# Supplementary material
Source: publisher figshare collection journal article supplement (https://geolsoc.figshare.com/ndownloader/files/16751270)
Supplement: Supplementary file 1 [file 16751270]

ID,Sample #,Reference,Type,y_i,x_i,Mg#,An%,H2O,P-T path,Melt loss,Pressure(kbar),Temperature(C),SiO2,TiO2,Al2O3,FeOt,MgO,CaO,Na2O,K2O,Plot Order,Symbol,Colour,Size,Mg number,Anorthite percentage,Water content,P-T path steepness,Melt threshold,Temp group,Si,Na,Mg,Al,K,Ca,Ti,Fe,MgO+FeOt,Na/Ca,A/CNK_manual,mg#
93BG1_1,93BG1,"Ayres, M. & Harris, N. 1997. REE fractionation and Nd-isotope disequilibrium during crustal anatexis: Constraints from Himalayan leucogranites. Chemical Geology, 139, 249–269, https://doi.org/10.1016/S0009-2541(97)00038-7.",Natural s-type granite,-1,-1,-1,-1,-1,-1,-1,-1,-1,75,0.03,15.07,0.44,0.08,0.49,5.08,3.82,2,20,47,0.5,Natural,Natural,Natural,Natural,Natural,Nat,1.248269367,0.163838759,0.002007542,0.295606186,0.081170454,0.00865726,0.000379915,0.006080351,0.52,18.93,1.17,24.82156923
93ZP3_2,93ZP3,"Ayres, M. & Harris, N. 1997. REE fractionation and Nd-isotope disequilibrium during crustal anatexis: Constraints from Himalayan leucogranites. Chemical Geology, 139, 249–269, https://doi.org/10.1016/S0009-2541(97)00038-7.",Natural s-type granite,-1,-1,-1,-1,-1,-1,-1,-1,-1,75.31,0.04,14.78,0.69,0.09,0.56,4.44,4.1,2,20,47,0.5,Natural,Natural,Natural,Natural,Natural,Nat,1.253494472,0.143296516,0.002253654,0.289826671,0.08699659,0.009898558,0.00050547,0.009606629,0.78,14.48,1.21,19.00168556
93G18_3,93G18,"Ayres, M. & Harris, N. 1997. REE fractionation and Nd-isotope disequilibrium during crustal anatexis: Constraints from Himalayan leucogranites. Chemical Geology, 139, 249–269, https://doi.org/10.1016/S0009-2541(97)00038-7.",Natural s-type granite,-1,-1,-1,-1,-1,-1,-1,-1,-1,75.08,0.06,14.82,0.74,0.11,0.54,4.73,3.9,2,20,47,0.5,Natural,Natural,Natural,Natural,Natural,Nat,1.249747952,0.152673279,0.002753243,0.290687464,0.082888522,0.009714271,0.000757868,0.010360447,0.86,15.72,1.19,20.99518179
MA97.3_4,MA97.3,"Ayres, M. & Harris, N. 1997. REE fractionation and Nd-isotope disequilibrium during crustal anatexis: Constraints from Himalayan leucogranites. Chemical Geology, 139, 249–269, https://doi.org/10.1016/S0009-2541(97)00038-7.",Natural s-type granite,-1,-1,-1,-1,-1,-1,-1,-1,-1,74.48,0.08,15.18,0.82,0.18,0.63,4.34,4.31,2,20,47,0.5,Natural,Natural,Natural,Natural,Natural,Nat,1.239609245,0.139932482,0.004503854,0.297715125,0.091426311,0.011149825,0.001010165,0.011367555,1,12.55,1.23,28.37715218
MN14_5,MN14,"Ayres, M. & Harris, N. 1997. REE fractionation and Nd-isotope disequilibrium during crustal anatexis: Constraints from Himalayan leucogranites. Chemical Geology, 139, 249–269, https://doi.org/10.1016/S0009-2541(97)00038-7.",Natural s-type granite,-1,-1,-1,-1,-1,-1,-1,-1,-1,75.05,0.14,14.04,1.15,0.19,0.79,2.48,6.15,2,20,47,0.5,Natural,Natural,Natural,Natural,Natural,Nat,1.249189406,0.079886829,0.00472491,0.275442331,0.130659155,0.014119899,0.001756946,0.016068031,1.34,5.66,1.23,22.72362449
MA88.1_6,MA88.1,"Ayres, M. & Harris, N. 1997. REE fractionation and Nd-isotope disequilibrium during crustal anatexis: Constraints from Himalayan leucogranites. Chemical Geology, 139, 249–269, https://doi.org/10.1016/S0009-2541(97)00038-7.",Natural s-type granite,-1,-1,-1,-1,-1,-1,-1,-1,-1,74.21,0.15,15.48,1.09,0.25,0.87,4.16,3.78,2,20,47,0.5,Natural,Natural,Natural,Natural,Natural,Nat,1.235208658,0.134128237,0.006273069,0.303716162,0.080305121,0.01550969,0.001899424,0.015199668,1.34,8.65,1.32,29.21411132
93G2_7,93G2,"Ayres, M. & Harris, N. 1997. REE fractionation and Nd-isotope disequilibrium during crustal anatexis: Constraints from Himalayan leucogranites. Chemical Geology, 139, 249–269, https://doi.org/10.1016/S0009-2541(97)00038-7.",Natural s-type granite,-1,-1,-1,-1,-1,-1,-1,-1,-1,73.95,0.13,15.34,1.37,0.29,0.65,4.11,4.15,2,20,47,0.5,Natural,Natural,Natural,Natural,Natural,Nat,1.230915717,0.132614153,0.00724752,0.300915067,0.088108979,0.011675335,0.001639552,0.019049392,1.66,11.36,1.29,27.56034512
93G8_8,93G8,"Ayres, M. & Harris, N. 1997. REE fractionation and Nd-isotope disequilibrium during crustal anatexis: Constraints from Himalayan leucogranites. Chemical Geology, 139, 249–269, https://doi.org/10.1016/S0009-2541(97)00038-7.",Natural s-type granite,-1,-1,-1,-1,-1,-1,-1,-1,-1,74.14,0.13,15.34,1.5,0.24,0.7,3.6,4.35,2,20,47,0.5,Natural,Natural,Natural,Natural,Natural,Nat,1.234002988,0.116151322,0.006037661,0.300918612,0.092352007,0.01247588,0.001650408,0.020826396,1.74,9.31,1.36,22.47486747
B-509_9,B-509,"Bea, F., Pereira, M.D., Corretgé, L.G. & Fershtater, G.B. 1994. Differentiation of strongly peraluminous, perphosphorus granites: The pedrobernardo pluton, central Spain. Geochimica et Cosmochimica Acta, 58, 2609–2627, https://doi.org/10.1016/0016-7037(94)90132-5.",Natural s-type granite,-1,-1,-1,-1,-1,-1,-1,-1,-1,77.29,0.04,13.57,0.62,0.07,0.14,4.1,4.17,2,20,47,0.5,Natural,Natural,Natural,Natural,Natural,Nat,1.286411414,0.132229993,0.001765975,0.266268941,0.088511974,0.002538512,0.000509257,0.008590254,0.69,52.09,1.19,17.05230143
B-507_10,B-507,"Bea, F., Pereira, M.D., Corretgé, L.G. & Fershtater, G.B. 1994. Differentiation of strongly peraluminous, perphosphorus granites: The pedrobernardo pluton, central Spain. Geochimica et Cosmochimica Acta, 58, 2609–2627, https://doi.org/10.1016/0016-7037(94)90132-5.",Natural s-type granite,-1,-1,-1,-1,-1,-1,-1,-1,-1,77.01,0.04,13.98,0.69,0.1,0.16,4.32,3.68,2,20,47,0.5,Natural,Natural,Natural,Natural,Natural,Nat,1.281852084,0.139385422,0.002539607,0.274264703,0.07823492,0.002920459,0.000512645,0.009644439,0.8,47.73,1.24,20.8437103
B-508_11,B-508,"Bea, F., Pereira, M.D., Corretgé, L.G. & Fershtater, G.B. 1994. Differentiation of strongly peraluminous, perphosphorus granites: The pedrobernardo pluton, central Spain. Geochimica et Cosmochimica Acta, 58, 2609–2627, https://doi.org/10.1016/0016-7037(94)90132-5.",Natural s-type granite,-1,-1,-1,-1,-1,-1,-1,-1,-1,76.06,0.06,14.42,0.78,0.12,0.3,4.14,4.13,2,20,47,0.5,Natural,Natural,Natural,Natural,Natural,Nat,1.265952207,0.133470133,0.003048215,0.282761124,0.087599376,0.005294525,0.000769141,0.010900591,0.91,25.21,1.25,21.85287627
B-505_12,B-505,"Bea, F., Pereira, M.D., Corretgé, L.G. & Fershtater, G.B. 1994. Differentiation of strongly peraluminous, perphosphorus granites: The pedrobernardo pluton, central Spain. Geochimica et Cosmochimica Acta, 58, 2609–2627, https://doi.org/10.1016/0016-7037(94)90132-5.",Natural s-type granite,-1,-1,-1,-1,-1,-1,-1,-1,-1,74.65,0.23,13.95,1.36,0.37,0.65,3.35,5.44,2,20,47,0.5,Natural,Natural,Natural,Natural,Natural,Nat,1.242433845,0.108025336,0.009088536,0.273641208,0.115578419,0.011612774,0.002930284,0.01894942,1.73,9.3,1.16,32.41511558
B-506_13,B-506,"Bea, F., Pereira, M.D., Corretgé, L.G. & Fershtater, G.B. 1994. Differentiation of strongly peraluminous, perphosphorus granites: The pedrobernardo pluton, central Spain. Geochimica et Cosmochimica Acta, 58, 2609–2627, https://doi.org/10.1016/0016-7037(94)90132-5.",Natural s-type granite,-1,-1,-1,-1,-1,-1,-1,-1,-1,74.43,0.28,13.93,1.74,0.45,0.73,3.31,5.13,2,20,47,0.5,Natural,Natural,Natural,Natural,Natural,Nat,1.238795682,0.106726771,0.011144042,0.273322465,0.109015835,0.013106512,0.003450995,0.024182591,2.19,8.14,1.19,31.54572269
B-504_14,B-504,"Bea, F., Pereira, M.D., Corretgé, L.G. & Fershtater, G.B. 1994. Differentiation of strongly peraluminous, perphosphorus granites: The pedrobernardo pluton, central Spain. Geochimica et Cosmochimica Acta, 58, 2609–2627, https://doi.org/10.1016/0016-7037(94)90132-5.",Natural s-type granite,-1,-1,-1,-1,-1,-1,-1,-1,-1,74.72,0.29,13.76,1.7,0.48,0.73,3.26,5.07,2,20,47,0.5,Natural,Natural,Natural,Natural,Natural,Nat,1.243617454,0.105113017,0.01187042,0.269958827,0.107628951,0.01306969,0.003568755,0.023632808,2.18,8.04,1.2,33.43476159
B-503_15,B-503,"Bea, F., Pereira, M.D., Corretgé, L.G. & Fershtater, G.B. 1994. Differentiation of strongly peraluminous, perphosphorus granites: The pedrobernardo pluton, central Spain. Geochimica et Cosmochimica Acta, 58, 2609–2627, https://doi.org/10.1016/0016-7037(94)90132-5.",Natural s-type granite,-1,-1,-1,-1,-1,-1,-1,-1,-1,73.87,0.33,14.25,1.75,0.52,0.78,3.15,5.36,2,20,47,0.5,Natural,Natural,Natural,Natural,Natural,Nat,1.229509104,0.101502757,0.012839497,0.279445789,0.113747879,0.013932631,0.004192589,0.024334192,2.27,7.29,1.22,34.53920616
B-510_16,B-510,"Bea, F., Pereira, M.D., Corretgé, L.G. & Fershtater, G.B. 1994. Differentiation of strongly peraluminous, perphosphorus granites: The pedrobernardo pluton, central Spain. Geochimica et Cosmochimica Acta, 58, 2609–2627, https://doi.org/10.1016/0016-7037(94)90132-5.",Natural s-type granite,-1,-1,-1,-1,-1,-1,-1,-1,-1,74.13,0.29,14.16,2.02,0.42,0.75,3.18,5.05,2,20,47,0.5,Natural,Natural,Natural,Natural,Natural,Nat,1.233898865,0.102677495,0.010374477,0.277667119,0.107181323,0.013457943,0.003575452,0.028163027,2.44,7.63,1.24,26.92046978
B-500_17,B-500,"Bea, F., Pereira, M.D., Corretgé, L.G. & Fershtater, G.B. 1994. Differentiation of strongly peraluminous, perphosphorus granites: The pedrobernardo pluton, central Spain. Geochimica et Cosmochimica Acta, 58, 2609–2627, https://doi.org/10.1016/0016-7037(94)90132-5.",Natural s-type granite,-1,-1,-1,-1,-1,-1,-1,-1,-1,73.32,0.33,14.55,1.99,0.57,0.94,3.1,5.19,2,20,47,0.5,Natural,Natural,Natural,Natural,Natural,Nat,1.220455709,0.100060039,0.014079556,0.285435508,0.110154551,0.016805385,0.004187023,0.02770114,2.56,5.95,1.26,33.69871061
B-502_18,B-502,"Bea, F., Pereira, M.D., Corretgé, L.G. & Fershtater, G.B. 1994. Differentiation of strongly peraluminous, perphosphorus granites: The pedrobernardo pluton, central Spain. Geochimica et Cosmochimica Acta, 58, 2609–2627, https://doi.org/10.1016/0016-7037(94)90132-5.",Natural s-type granite,-1,-1,-1,-1,-1,-1,-1,-1,-1,73.08,0.35,14.51,2.09,0.58,0.98,3.17,5.24,2,20,47,0.5,Natural,Natural,Natural,Natural,Natural,Nat,1.216356067,0.102400617,0.014430412,0.284613895,0.111352134,0.01746786,0.004343835,0.029029547,2.67,5.86,1.23,33.20392432
B-501_19,B-501,"Bea, F., Pereira, M.D., Corretgé, L.G. & Fershtater, G.B. 1994. Differentiation of strongly peraluminous, perphosphorus granites: The pedrobernardo pluton, central Spain. Geochimica et Cosmochimica Acta, 58, 2609–2627, https://doi.org/10.1016/0016-7037(94)90132-5.",Natural s-type granite,-1,-1,-1,-1,-1,-1,-1,-1,-1,72.8,0.38,14.66,2.06,0.6,1.03,3.19,5.29,2,20,47,0.5,Natural,Natural,Natural,Natural,Natural,Nat,1.211765169,0.102871254,0.014909511,0.287491367,0.112230344,0.01834414,0.004718496,0.028678887,2.66,5.61,1.23,34.20522819
RRG4_20,RRG4,"Birch, W.D. 1978. Petrogenesis of some palaeozoic rhyolites in Victoria. Australian Journal of Earth Sciences, 25, 75–87, https://doi.org/10.1080/00167617808729015.",Natural s-type granite,-1,-1,-1,-1,-1,-1,-1,-1,-1,75.84,0.04,14.32,1,0,0.37,4.43,4.01,2,20,47,0.5,Natural,Natural,Natural,Natural,Natural,Nat,1.262285337,0.142809567,0,0.280880675,0.085064571,0.006561425,0.000511896,0.013941809,1,21.77,1.2,0
RRA25_21,RRA25,"Birch, W.D. 1978. Petrogenesis of some palaeozoic rhyolites in Victoria. Australian Journal of Earth Sciences, 25, 75–87, https://doi.org/10.1080/00167617808729015.",Natural s-type granite,-1,-1,-1,-1,-1,-1,-1,-1,-1,75.32,0.1,14.74,0.88,0.52,0.32,3.93,4.19,2,20,47,0.5,Natural,Natural,Natural,Natural,Natural,Nat,1.253705969,0.126807725,0.012868103,0.289160016,0.088938954,0.005691487,0.001248825,0.012244519,1.4,22.28,1.31,51.24157505
RRD34_22,RRD34,"Birch, W.D. 1978. Petrogenesis of some palaeozoic rhyolites in Victoria. Australian Journal of Earth Sciences, 25, 75–87, https://doi.org/10.1080/00167617808729015.",Natural s-type granite,-1,-1,-1,-1,-1,-1,-1,-1,-1,75.03,0.4,13.08,2.49,0.8,1.19,2.38,4.64,2,20,47,0.5,Natural,Natural,Natural,Natural,Natural,Nat,1.248889516,0.076665785,0.01981846,0.256518575,0.098492928,0.021183508,0.005000696,0.034637259,3.29,3.62,1.31,36.39371575
RRA21_23,RRA21,"Birch, W.D. 1978. Petrogenesis of some palaeozoic rhyolites in Victoria. Australian Journal of Earth Sciences, 25, 75–87, https://doi.org/10.1080/00167617808729015.",Natural s-type granite,-1,-1,-1,-1,-1,-1,-1,-1,-1,76.58,0.09,12.94,1.5,0.57,0.59,3.07,4.66,2,20,47,0.5,Natural,Natural,Natural,Natural,Natural,Nat,1.274609265,0.099017357,0.014051395,0.253889453,0.099034499,0.010466373,0.001160352,0.020867964,2.07,9.46,1.22,40.23955565
J3_24,J3,"Birch, W.D. 1978. Petrogenesis of some palaeozoic rhyolites in Victoria. Australian Journal of Earth Sciences, 25, 75–87, https://doi.org/10.1080/00167617808729015.",Natural s-type granite,-1,-1,-1,-1,-1,-1,-1,-1,-1,76.4,0.05,13.1,1.03,0.03,0.59,4.16,4.64,2,20,47,0.5,Natural,Natural,Natural,Natural,Natural,Nat,1.271578743,0.134372934,0.00075049,0.256912489,0.098472014,0.010608159,0.000631225,0.014314809,1.06,12.67,1.06,4.981578063
J22_25,J22,"Birch, W.D. 1978. Petrogenesis of some palaeozoic rhyolites in Victoria. Australian Journal of Earth Sciences, 25, 75–87, https://doi.org/10.1080/00167617808729015.",Natural s-type granite,-1,-1,-1,-1,-1,-1,-1,-1,-1,76.41,0.1,12.81,1.18,0.09,0.83,3.85,4.73,2,20,47,0.5,Natural,Natural,Natural,Natural,Natural,Nat,1.271750207,0.124186463,0.002243777,0.251304339,0.100482315,0.014872359,0.001258136,0.016363831,1.27,8.35,1.05,12.05838458
T6_26,T6,"Birch, W.D. 1978. Petrogenesis of some palaeozoic rhyolites in Victoria. Australian Journal of Earth Sciences, 25, 75–87, https://doi.org/10.1080/00167617808729015.",Natural s-type granite,-1,-1,-1,-1,-1,-1,-1,-1,-1,78.57,0.08,12.21,0.96,0.1,0.17,2.8,5.11,2,20,47,0.5,Natural,Natural,Natural,Natural,Natural,Nat,1.307679292,0.090229751,0.002504561,0.239590547,0.108446053,0.003060167,0.001011142,0.013404234,1.06,29.49,1.19,15.7432494
BD13_27,BD13,"Bourne, J. & Danis, D. 1987. A proposed model for the formation of reversely zoned plutons based on study of the Lacorne Complex, Superior Province, Quebec. Canadian Journal of Earth Sciences, 24, 2506–2520.",Natural s-type granite,-1,-1,-1,-1,-1,-1,-1,-1,-1,75.81,0.1,14.08,0.62,0.08,0.57,4.96,3.78,2,20,47,0.5,Natural,Natural,Natural,Natural,Natural,Nat,1.261782204,0.160010185,0.002025177,0.276187973,0.080150516,0.010188862,0.001277508,0.00867608,0.7,15.7,1.1,18.92466659
BD14_28,BD14,"Bourne, J. & Danis, D. 1987. A proposed model for the formation of reversely zoned plutons based on study of the Lacorne Complex, Superior Province, Quebec. Canadian Journal of Earth Sciences, 24, 2506–2520.",Natural s-type granite,-1,-1,-1,-1,-1,-1,-1,-1,-1,76.49,0.1,13.27,0.65,0.1,0.54,4.37,4.47,2,20,47,0.5,Natural,Natural,Natural,Natural,Natural,Nat,1.273176912,0.14109419,0.002493915,0.260260417,0.094967089,0.00967921,0.001258555,0.009050925,0.75,14.58,1.06,21.60198554
BD15_29,BD15,"Bourne, J. & Danis, D. 1987. A proposed model for the formation of reversely zoned plutons based on study of the Lacorne Complex, Superior Province, Quebec. Canadian Journal of Earth Sciences, 24, 2506–2520.",Natural s-type granite,-1,-1,-1,-1,-1,-1,-1,-1,-1,76.24,0.06,14.57,0.78,0.14,0.66,4.98,2.57,2,20,47,0.5,Natural,Natural,Natural,Natural,Natural,Nat,1.26899412,0.160593628,0.003564317,0.285817775,0.05446529,0.011710969,0.000770886,0.010910732,0.93,13.71,1.26,24.62386711
BD18_30,BD18,"Bourne, J. & Danis, D. 1987. A proposed model for the formation of reversely zoned plutons based on study of the Lacorne Complex, Superior Province, Quebec. Canadian Journal of Earth Sciences, 24, 2506–2520.",Natural s-type granite,-1,-1,-1,-1,-1,-1,-1,-1,-1,74.46,0.1,13.97,1.04,0.17,0.94,4.45,4.87,2,20,47,0.5,Natural,Natural,Natural,Natural,Natural,Nat,1.239311596,0.143645597,0.004209864,0.27409418,0.103411902,0.016730603,0.001249711,0.014461086,1.21,8.59,1.04,22.5476687
BD17_31,BD17,"Bourne, J. & Danis, D. 1987. A proposed model for the formation of reversely zoned plutons based on study of the Lacorne Complex, Superior Province, Quebec. Canadian Journal of Earth Sciences, 24, 2506–2520.",Natural s-type granite,-1,-1,-1,-1,-1,-1,-1,-1,-1,74.3,0.1,14.03,1.07,0.2,0.79,4.1,5.41,2,20,47,0.5,Natural,Natural,Natural,Natural,Natural,Nat,1.236696346,0.13225956,0.005009481,0.275251793,0.114883873,0.014041772,0.001264018,0.014851356,1.27,9.42,1.05,25.22290965
BD16_32,BD16,"Bourne, J. & Danis, D. 1987. A proposed model for the formation of reversely zoned plutons based on study of the Lacorne Complex, Superior Province, Quebec. Canadian Journal of Earth Sciences, 24, 2506–2520.",Natural s-type granite,-1,-1,-1,-1,-1,-1,-1,-1,-1,74.49,0.1,13.65,1.32,0.22,0.84,4,5.38,2,20,47,0.5,Natural,Natural,Natural,Natural,Natural,Nat,1.239878898,0.129158425,0.005517114,0.267655173,0.114164855,0.014960012,0.001265551,0.018386257,1.54,8.63,1.04,23.08090221
VB221_33,VB221,"Chappell, B.W. & White, A.J.R. 1992. I-Type and S-Type granites in the Lachlan Fold Belt. Transactions of the Royal Society of Edinburgh-Earth Sciences, 83, 1–26, https://doi.org/Doi 10.1017/S0263593300007720.",Natural s-type granite,-1,-1,-1,-1,-1,-1,-1,-1,-1,70.08,0.75,15.28,4.79,2.08,1.08,1.42,4.51,2,20,47,0.5,Natural,Natural,Natural,Natural,Natural,Nat,1.166378903,0.045978698,0.051491474,0.299746151,0.095797078,0.019332729,0.009437406,0.066711331,6.87,2.38,1.86,43.56197309
CC1_34,CC1,"Chappell, B.W. & White, A.J.R. 1992. I-Type and S-Type granites in the Lachlan Fold Belt. Transactions of the Royal Society of Edinburgh-Earth Sciences, 83, 1–26, https://doi.org/Doi 10.1017/S0263593300007720.",Natural s-type granite,-1,-1,-1,-1,-1,-1,-1,-1,-1,73.32,0.55,13.97,4.08,1.79,0.97,1.52,3.8,2,20,47,0.5,Natural,Natural,Natural,Natural,Natural,Nat,1.220357734,0.048961724,0.044467713,0.274055717,0.080644083,0.01725124,0.006885198,0.056850541,5.88,2.84,1.87,43.88914236
BB11_35,BB11,"Chappell, B.W. & White, A.J.R. 1992. I-Type and S-Type granites in the Lachlan Fold Belt. Transactions of the Royal Society of Edinburgh-Earth Sciences, 83, 1–26, https://doi.org/Doi 10.1017/S0263593300007720.",Natural s-type granite,-1,-1,-1,-1,-1,-1,-1,-1,-1,72.41,0.36,14.22,2.97,1.02,2.36,2.61,4.05,2,20,47,0.5,Natural,Natural,Natural,Natural,Natural,Nat,1.205263042,0.084382542,0.025343951,0.278911352,0.085881786,0.042077594,0.004476441,0.041343787,3.99,2.01,1.31,38.00391497
VB140_36,VB140,"Chappell, B.W. & White, A.J.R. 1992. I-Type and S-Type granites in the Lachlan Fold Belt. Transactions of the Royal Society of Edinburgh-Earth Sciences, 83, 1–26, https://doi.org/Doi 10.1017/S0263593300007720.",Natural s-type granite,-1,-1,-1,-1,-1,-1,-1,-1,-1,74,0.26,14.8,1.62,0.48,0.67,2.86,5.31,2,20,47,0.5,Natural,Natural,Natural,Natural,Natural,Nat,1.231628219,0.092243389,0.011905202,0.290375213,0.112712947,0.012015655,0.003195725,0.02260768,2.1,7.68,1.34,34.49495134
KB 102_37,KB 102,"Chappell, B.W. & White, A.J.R. 1992. I-Type and S-Type granites in the Lachlan Fold Belt. Transactions of the Royal Society of Edinburgh-Earth Sciences, 83, 1–26, https://doi.org/Doi 10.1017/S0263593300007720.",Natural s-type granite,-1,-1,-1,-1,-1,-1,-1,-1,-1,74.68,0.3,13.38,2.23,0.61,1.7,3,4.1,2,20,47,0.5,Natural,Natural,Natural,Natural,Natural,Nat,1.242973444,0.096965864,0.015061747,0.262366386,0.086998284,0.030310841,0.003800458,0.031092952,2.84,3.2,1.22,32.63318237
SV51_38,SV51,"Chappell, B.W. & White, A.J.R. 1992. I-Type and S-Type granites in the Lachlan Fold Belt. Transactions of the Royal Society of Edinburgh-Earth Sciences, 83, 1–26, https://doi.org/Doi 10.1017/S0263593300007720.",Natural s-type granite,-1,-1,-1,-1,-1,-1,-1,-1,-1,69.61,0.62,14.74,4.44,2.1,2.74,2.08,3.66,2,20,47,0.5,Natural,Natural,Natural,Natural,Natural,Nat,1.158671157,0.067010658,0.052031146,0.28915196,0.077754245,0.048888748,0.007813217,0.061864204,6.54,1.37,1.49,45.68329273
KB32_39,KB32,"Chappell, B.W. & White, A.J.R. 1992. I-Type and S-Type granites in the Lachlan Fold Belt. Transactions of the Royal Society of Edinburgh-Earth Sciences, 83, 1–26, https://doi.org/Doi 10.1017/S0263593300007720.",Natural s-type granite,-1,-1,-1,-1,-1,-1,-1,-1,-1,69.3,0.66,15.05,4.75,2.27,2.31,1.97,3.69,2,20,47,0.5,Natural,Natural,Natural,Natural,Natural,Nat,1.153467565,0.063439834,0.056399529,0.295251739,0.078263011,0.0412663,0.008205272,0.066157259,7.03,1.54,1.61,46.0190983
TB83_40,TB83,"Chappell, B.W. & White, A.J.R. 1992. I-Type and S-Type granites in the Lachlan Fold Belt. Transactions of the Royal Society of Edinburgh-Earth Sciences, 83, 1–26, https://doi.org/Doi 10.1017/S0263593300007720.",Natural s-type granite,-1,-1,-1,-1,-1,-1,-1,-1,-1,74.74,0.01,15.37,0.69,0.02,0.3,4.71,4.17,2,20,47,0.5,Natural,Natural,Natural,Natural,Natural,Nat,1.244007794,0.151866622,0.000505489,0.301525409,0.088457957,0.005267986,0.000127548,0.009599067,0.71,28.83,1.23,5.002588705
ER62_41,ER62,"Chappell, B.W. & White, A.J.R. 1992. I-Type and S-Type granites in the Lachlan Fold Belt. Transactions of the Royal Society of Edinburgh-Earth Sciences, 83, 1–26, https://doi.org/Doi 10.1017/S0263593300007720.",Natural s-type granite,-1,-1,-1,-1,-1,-1,-1,-1,-1,66.4,0.75,15.13,5.58,3.34,4.06,1.77,2.97,2,20,47,0.5,Natural,Natural,Natural,Natural,Natural,Nat,1.105226702,0.056994469,0.0828316,0.29678991,0.063077263,0.072459605,0.00933172,0.077714928,8.92,0.79,1.54,51.59351698
BB2_42,BB2,"Chappell, B.W. & White, A.J.R. 1992. I-Type and S-Type granites in the Lachlan Fold Belt. Transactions of the Royal Society of Edinburgh-Earth Sciences, 83, 1–26, https://doi.org/Doi 10.1017/S0263593300007720.",Natural s-type granite,-1,-1,-1,-1,-1,-1,-1,-1,-1,74.49,0.22,13.59,1.89,0.72,1.72,2.67,4.69,2,20,47,0.5,Natural,Natural,Natural,Natural,Natural,Nat,1.239824208,0.086032489,0.017857752,0.266655064,0.099650842,0.030731371,0.002792426,0.026328285,2.61,2.8,1.23,40.41492078
CV115_43,CV115,"Chappell, B.W. & White, A.J.R. 1992. I-Type and S-Type granites in the Lachlan Fold Belt. Transactions of the Royal Society of Edinburgh-Earth Sciences, 83, 1–26, https://doi.org/Doi 10.1017/S0263593300007720.",Natural s-type granite,-1,-1,-1,-1,-1,-1,-1,-1,-1,74.78,0.37,13.28,2.45,0.62,1.22,2.62,4.67,2,20,47,0.5,Natural,Natural,Natural,Natural,Natural,Nat,1.244609713,0.08452709,0.015366244,0.260494328,0.099157892,0.021726198,0.004576473,0.034113922,3.07,3.89,1.27,31.05536111
M107_44,M107,"Chappell, B.W. 1978. Granitoids from the moonbi district, new england batholith, eastern Australia. Journal of the Geological Society of Australia, 25, 267–283, https://doi.org/10.1080/00167617808729035.",Natural s-type granite,-1,-1,-1,-1,-1,-1,-1,-1,-1,70.71,0.56,14.7,3.43,1.22,2.03,3.31,4.05,2,20,47,0.5,Natural,Natural,Natural,Natural,Natural,Nat,1.176895682,0.106666327,0.030282165,0.288287722,0.085944937,0.036274402,0.007004206,0.047708694,4.65,2.94,1.26,38.82783855
M118_45,M118,"Chappell, B.W. 1978. Granitoids from the moonbi district, new england batholith, eastern Australia. Journal of the Geological Society of Australia, 25, 267–283, https://doi.org/10.1080/00167617808729035.",Natural s-type granite,-1,-1,-1,-1,-1,-1,-1,-1,-1,74.72,0.26,13.64,1.71,0.36,1.46,3.08,4.76,2,20,47,0.5,Natural,Natural,Natural,Natural,Natural,Nat,1.243620285,0.099400618,0.009020974,0.267644863,0.100995819,0.026114609,0.003287871,0.023813668,2.07,3.81,1.18,27.47395276
M120_46,M120,"Chappell, B.W. 1978. Granitoids from the moonbi district, new england batholith, eastern Australia. Journal of the Geological Society of Australia, 25, 267–283, https://doi.org/10.1080/00167617808729035.",Natural s-type granite,-1,-1,-1,-1,-1,-1,-1,-1,-1,73.25,0.39,14.21,2.16,0.58,1.63,3.15,4.63,2,20,47,0.5,Natural,Natural,Natural,Natural,Natural,Nat,1.219264921,0.101581745,0.014315016,0.278764012,0.098212038,0.029060791,0.004942789,0.03006584,2.74,3.5,1.22,32.25493385
M122_47,M122,"Chappell, B.W. 1978. Granitoids from the moonbi district, new england batholith, eastern Australia. Journal of the Geological Society of Australia, 25, 267–283, https://doi.org/10.1080/00167617808729035.",Natural s-type granite,-1,-1,-1,-1,-1,-1,-1,-1,-1,74.48,0.27,13.97,1.67,0.35,1.49,3.14,4.63,2,20,47,0.5,Natural,Natural,Natural,Natural,Natural,Nat,1.239643547,0.101337175,0.008797045,0.27402216,0.098291631,0.02655527,0.003424704,0.023181021,2.02,3.82,1.21,27.50962276
M125_48,M125,"Chappell, B.W. 1978. Granitoids from the moonbi district, new england batholith, eastern Australia. Journal of the Geological Society of Australia, 25, 267–283, https://doi.org/10.1080/00167617808729035.",Natural s-type granite,-1,-1,-1,-1,-1,-1,-1,-1,-1,75.81,0.28,12.91,1.5,0.34,1.23,3.09,4.83,2,20,47,0.5,Natural,Natural,Natural,Natural,Natural,Nat,1.261894348,0.099595758,0.008536535,0.253282972,0.102483187,0.022015427,0.003547736,0.020846174,1.84,4.52,1.13,29.05291919
lag0490_49,lag0490,"Day, W. & Weiblen, P. 1986. Origin of late Archean granite: geochemical evidence from the Vermilion Granitic Complex of northern Minnesota. Contributions to Mineralogy and Petrology, 93, 283–296.",Natural s-type granite,-1,-1,-1,-1,-1,-1,-1,-1,-1,73.97,0.1,16.18,0.46,0.1,1.18,2.3,5.7,2,20,47,0.5,Natural,Natural,Natural,Natural,Natural,Nat,1.231273914,0.074139708,0.002556276,0.317292626,0.120966296,0.021128571,0.001290025,0.006451878,0.57,3.51,1.47,28.37735547
lag0494_50,lag0494,"Day, W. & Weiblen, P. 1986. Origin of late Archean granite: geochemical evidence from the Vermilion Granitic Complex of northern Minnesota. Contributions to Mineralogy and Petrology, 93, 283–296.",Natural s-type granite,-1,-1,-1,-1,-1,-1,-1,-1,-1,75.1,0.09,15.16,0.42,0.13,1.1,1.75,6.25,2,20,47,0.5,Natural,Natural,Natural,Natural,Natural,Nat,1.249934892,0.056423556,0.003260013,0.297385596,0.132616044,0.019645683,0.001138962,0.00590733,0.56,2.87,1.43,35.56115857
lag0493_51,lag0493,"Day, W. & Weiblen, P. 1986. Origin of late Archean granite: geochemical evidence from the Vermilion Granitic Complex of northern Minnesota. Contributions to Mineralogy and Petrology, 93, 283–296.",Natural s-type granite,-1,-1,-1,-1,-1,-1,-1,-1,-1,76.21,0.18,14.88,0.62,0.13,1.02,1.92,5.04,2,20,47,0.5,Natural,Natural,Natural,Natural,Natural,Nat,1.268424862,0.062049623,0.003264304,0.291821441,0.107006,0.018227756,0.002280921,0.008590985,0.75,3.4,1.56,27.53457873
lag0492_52,lag0492,"Day, W. & Weiblen, P. 1986. Origin of late Archean granite: geochemical evidence from the Vermilion Granitic Complex of northern Minnesota. Contributions to Mineralogy and Petrology, 93, 283–296.",Natural s-type granite,-1,-1,-1,-1,-1,-1,-1,-1,-1,74.5,0.13,16.58,0.65,0.13,0.9,2.3,4.8,2,20,47,0.5,Natural,Natural,Natural,Natural,Natural,Nat,1.24009249,0.074376752,0.003260674,0.325207483,0.101950466,0.016044222,0.0016455,0.009003471,0.78,4.64,1.69,26.58704893
lag0489_53,lag0489,"Day, W. & Weiblen, P. 1986. Origin of late Archean granite: geochemical evidence from the Vermilion Granitic Complex of northern Minnesota. Contributions to Mineralogy and Petrology, 93, 283–296.",Natural s-type granite,-1,-1,-1,-1,-1,-1,-1,-1,-1,73.57,0.18,15.77,0.94,0.16,0.98,1.88,6.52,2,20,47,0.5,Natural,Natural,Natural,Natural,Natural,Nat,1.2245783,0.060657415,0.004011923,0.309250116,0.138396119,0.017481109,0.002277696,0.01307921,1.1,3.47,1.43,23.47371102
lag0491_54,lag0491,"Day, W. & Weiblen, P. 1986. Origin of late Archean granite: geochemical evidence from the Vermilion Granitic Complex of northern Minnesota. Contributions to Mineralogy and Petrology, 93, 283–296.",Natural s-type granite,-1,-1,-1,-1,-1,-1,-1,-1,-1,75.31,0.22,15.96,1,0.28,1.45,2.01,3.76,2,20,47,0.5,Natural,Natural,Natural,Natural,Natural,Nat,1.25354024,0.064938318,0.007060827,0.313003949,0.079841891,0.025917802,0.002799695,0.013860839,1.28,2.51,1.83,33.74887496
DD01_55,DD01,"Downes, H. & Duthou, J.L. 1988. Isotopic and trace-element arguments for the lower-crustal origin of Hercynian granitoids and pre-Hercynian orthogneisses, Massif Central (France). Chemical Geology, 68, 291–308.",Natural s-type granite,-1,-1,-1,-1,-1,-1,-1,-1,-1,74.96,0.14,14.88,1.15,0.35,0.73,3.91,3.89,2,20,47,0.5,Natural,Natural,Natural,Natural,Natural,Nat,1.247593437,0.126137608,0.008632207,0.291850171,0.082557791,0.012955848,0.001793748,0.016020118,1.5,9.74,1.32,35.01579247
GLC1_56,GLC1,"Downes, H. & Duthou, J.L. 1988. Isotopic and trace-element arguments for the lower-crustal origin of Hercynian granitoids and pre-Hercynian orthogneisses, Massif Central (France). Chemical Geology, 68, 291–308.",Natural s-type granite,-1,-1,-1,-1,-1,-1,-1,-1,-1,71.97,0.22,16.26,1.19,0.64,0.93,4.66,4.13,2,20,47,0.5,Natural,Natural,Natural,Natural,Natural,Nat,1.19790649,0.150484281,0.01577798,0.318976744,0.087652784,0.016560112,0.002780507,0.016561319,1.83,9.09,1.25,48.7888747
DD-5312_57,DD-5312,"Downes, H. & Duthou, J.L. 1988. Isotopic and trace-element arguments for the lower-crustal origin of Hercynian granitoids and pre-Hercynian orthogneisses, Massif Central (France). Chemical Geology, 68, 291–308.",Natural s-type granite,-1,-1,-1,-1,-1,-1,-1,-1,-1,75.54,0.16,15.02,0.76,0.13,0.4,3.02,4.96,2,20,47,0.5,Natural,Natural,Natural,Natural,Natural,Nat,1.257373981,0.097429001,0.003290043,0.29472271,0.105250956,0.007093939,0.002043472,0.010603496,0.89,13.73,1.4,23.68038085
DD-6042_58,DD-6042,"Downes, H. & Duthou, J.L. 1988. Isotopic and trace-element arguments for the lower-crustal origin of Hercynian granitoids and pre-Hercynian orthogneisses, Massif Central (France). Chemical Geology, 68, 291–308.",Natural s-type granite,-1,-1,-1,-1,-1,-1,-1,-1,-1,74.53,0.19,14.82,1.17,0.28,0.69,3.35,4.96,2,20,47,0.5,Natural,Natural,Natural,Natural,Natural,Nat,1.24056491,0.108109726,0.006842525,0.290718488,0.105395103,0.012385858,0.002429947,0.016246847,1.44,8.73,1.29,29.63495353
DD-7189_59,DD-7189,"Downes, H. & Duthou, J.L. 1988. Isotopic and trace-element arguments for the lower-crustal origin of Hercynian granitoids and pre-Hercynian orthogneisses, Massif Central (France). Chemical Geology, 68, 291–308.",Natural s-type granite,-1,-1,-1,-1,-1,-1,-1,-1,-1,68.88,0.54,16.38,3.02,1.45,2.1,3.28,4.35,2,20,47,0.5,Natural,Natural,Natural,Natural,Natural,Nat,1.14640371,0.105961519,0.035928769,0.321256675,0.092451384,0.037461555,0.006767377,0.04202064,4.47,2.83,1.36,46.09242002
DD-202_60,DD-202,"Downes, H. & Duthou, J.L. 1988. Isotopic and trace-element arguments for the lower-crustal origin of Hercynian granitoids and pre-Hercynian orthogneisses, Massif Central (France). Chemical Geology, 68, 291–308.",Natural s-type granite,-1,-1,-1,-1,-1,-1,-1,-1,-1,68.82,0.48,16.14,2.81,1.4,2.66,3.61,4.08,2,20,47,0.5,Natural,Natural,Natural,Natural,Natural,Nat,1.145396295,0.116386746,0.034829169,0.316559781,0.086583906,0.047507315,0.006029911,0.039141292,4.22,2.45,1.26,47.08523992
DD-203_61,DD-203,"Downes, H. & Duthou, J.L. 1988. Isotopic and trace-element arguments for the lower-crustal origin of Hercynian granitoids and pre-Hercynian orthogneisses, Massif Central (France). Chemical Geology, 68, 291–308.",Natural s-type granite,-1,-1,-1,-1,-1,-1,-1,-1,-1,72.56,0.25,16.28,1.37,0.47,0.6,3.53,4.93,2,20,47,0.5,Natural,Natural,Natural,Natural,Natural,Nat,1.207774337,0.113986404,0.011753804,0.319378092,0.104734,0.01065156,0.003094727,0.019089524,1.85,10.7,1.39,38.1080926
DD-201_62,DD-201,"Downes, H. & Duthou, J.L. 1988. Isotopic and trace-element arguments for the lower-crustal origin of Hercynian granitoids and pre-Hercynian orthogneisses, Massif Central (France). Chemical Geology, 68, 291–308.",Natural s-type granite,-1,-1,-1,-1,-1,-1,-1,-1,-1,75.48,0.22,13.88,1.34,0.68,0.7,3.2,4.51,2,20,47,0.5,Natural,Natural,Natural,Natural,Natural,Nat,1.256264436,0.103372498,0.016813419,0.272296104,0.095699172,0.012450466,0.00269974,0.018646309,2.02,8.3,1.29,47.41553307
DD-5740_63,DD-5740,"Downes, H. & Duthou, J.L. 1988. Isotopic and trace-element arguments for the lower-crustal origin of Hercynian granitoids and pre-Hercynian orthogneisses, Massif Central (France). Chemical Geology, 68, 291–308.",Natural s-type granite,-1,-1,-1,-1,-1,-1,-1,-1,-1,70.48,0.43,14.9,3.12,1.67,2.03,3.26,4.11,2,20,47,0.5,Natural,Natural,Natural,Natural,Natural,Nat,1.173066408,0.105065823,0.041395318,0.292359625,0.087161535,0.036243317,0.005444102,0.043438436,4.79,2.9,1.28,48.79581124
DD-5584_64,DD-5584,"Downes, H. & Duthou, J.L. 1988. Isotopic and trace-element arguments for the lower-crustal origin of Hercynian granitoids and pre-Hercynian orthogneisses, Massif Central (France). Chemical Geology, 68, 291–308.",Natural s-type granite,-1,-1,-1,-1,-1,-1,-1,-1,-1,76.35,0.16,13.26,1.63,0.24,0.67,2.85,4.82,2,20,47,0.5,Natural,Natural,Natural,Natural,Natural,Nat,1.270836695,0.092028169,0.006043484,0.260198246,0.102353173,0.011944959,0.002033231,0.022753172,1.88,7.7,1.26,20.98675671
DD-5581_65,DD-5581,"Downes, H. & Duthou, J.L. 1988. Isotopic and trace-element arguments for the lower-crustal origin of Hercynian granitoids and pre-Hercynian orthogneisses, Massif Central (France). Chemical Geology, 68, 291–308.",Natural s-type granite,-1,-1,-1,-1,-1,-1,-1,-1,-1,75.86,0.15,13.52,1.63,0.25,0.74,3.3,4.54,2,20,47,0.5,Natural,Natural,Natural,Natural,Natural,Nat,1.262645427,0.106545324,0.006301628,0.26524268,0.096416597,0.013225137,0.001908071,0.022648816,1.88,8.06,1.23,21.76694675
DD-5329_66,DD-5329,"Downes, H. & Duthou, J.L. 1988. Isotopic and trace-element arguments for the lower-crustal origin of Hercynian granitoids and pre-Hercynian orthogneisses, Massif Central (France). Chemical Geology, 68, 291–308.",Natural s-type granite,-1,-1,-1,-1,-1,-1,-1,-1,-1,73.94,0.34,13.94,2.4,0.66,1.28,2.97,4.48,2,20,47,0.5,Natural,Natural,Natural,Natural,Natural,Nat,1.230734081,0.095690308,0.016322075,0.273368577,0.09519131,0.022740351,0.004308553,0.033337309,3.05,4.21,1.28,32.86805814
velay_67,velay,"Downes, H. & Duthou, J.L. 1988. Isotopic and trace-element arguments for the lower-crustal origin of Hercynian granitoids and pre-Hercynian orthogneisses, Massif Central (France). Chemical Geology, 68, 291–308.",Natural s-type granite,-1,-1,-1,-1,-1,-1,-1,-1,-1,75.45,0.12,14.95,1.09,0.3,0.47,3.19,4.43,2,20,47,0.5,Natural,Natural,Natural,Natural,Natural,Nat,1.255789765,0.103044296,0.007387938,0.293250836,0.093958068,0.008422629,0.001542755,0.015174697,1.39,12.23,1.43,32.74412788
DD-204_68,DD-204,"Downes, H. & Duthou, J.L. 1988. Isotopic and trace-element arguments for the lower-crustal origin of Hercynian granitoids and pre-Hercynian orthogneisses, Massif Central (France). Chemical Geology, 68, 291–308.",Natural s-type granite,-1,-1,-1,-1,-1,-1,-1,-1,-1,68.93,0.52,16.11,3.13,1.64,1.51,3.22,4.93,2,20,47,0.5,Natural,Natural,Natural,Natural,Natural,Nat,1.147336656,0.104029127,0.040757448,0.315982164,0.104630858,0.026913422,0.006556132,0.043591264,4.77,3.87,1.34,48.32017781
AS2_69,AS2,"Downes, H., Dupuy, C. & Leyreloup, A.F. 1990. Crustal evolution of the Hercynian belt of Western Europe: Evidence from lower-crustal granulitic xenoliths (French Massif Central). Chemical Geology, 83, 209–231, https://doi.org/10.1016/0009-2541(90)90281-B.",Natural s-type granite,-1,-1,-1,-1,-1,-1,-1,-1,-1,72.6,0.28,15.29,1.79,0.84,1.02,3.45,4.72,2,20,47,0.5,Natural,Natural,Natural,Natural,Natural,Nat,1.208355215,0.111384432,0.020845384,0.300019095,0.100149613,0.018231305,0.003523442,0.024975305,2.63,6.11,1.31,45.49338811
AS19_70,AS19,"Downes, H., Dupuy, C. & Leyreloup, A.F. 1990. Crustal evolution of the Hercynian belt of Western Europe: Evidence from lower-crustal granulitic xenoliths (French Massif Central). Chemical Geology, 83, 209–231, https://doi.org/10.1016/0009-2541(90)90281-B.",Natural s-type granite,-1,-1,-1,-1,-1,-1,-1,-1,-1,72.12,0.29,15.34,2.16,0.87,1.23,3.35,4.64,2,20,47,0.5,Natural,Natural,Natural,Natural,Natural,Nat,1.200323279,0.108161185,0.021542371,0.300819126,0.098601706,0.021964406,0.003640643,0.030094336,3.03,4.92,1.32,41.71910232
AS21_71,AS21,"Downes, H., Dupuy, C. & Leyreloup, A.F. 1990. Crustal evolution of the Hercynian belt of Western Europe: Evidence from lower-crustal granulitic xenoliths (French Massif Central). Chemical Geology, 83, 209–231, https://doi.org/10.1016/0009-2541(90)90281-B.",Natural s-type granite,-1,-1,-1,-1,-1,-1,-1,-1,-1,72.01,0.3,15.4,2.11,0.92,1.22,3.42,4.63,2,20,47,0.5,Natural,Natural,Natural,Natural,Natural,Nat,1.198629496,0.110210018,0.022929346,0.302063763,0.098318744,0.021674735,0.003697785,0.029313828,3.03,5.08,1.31,43.88964972
AS4_72,AS4,"Downes, H., Dupuy, C. & Leyreloup, A.F. 1990. Crustal evolution of the Hercynian belt of Western Europe: Evidence from lower-crustal granulitic xenoliths (French Massif Central). Chemical Geology, 83, 209–231, https://doi.org/10.1016/0009-2541(90)90281-B.",Natural s-type granite,-1,-1,-1,-1,-1,-1,-1,-1,-1,70.37,0.41,15.63,2.4,1.25,1.73,3.46,4.76,2,20,47,0.5,Natural,Natural,Natural,Natural,Natural,Nat,1.171275054,0.111624409,0.030937421,0.306525114,0.100984592,0.030842918,0.005174814,0.033374984,3.64,3.62,1.26,48.10490441
AS31_73,AS31,"Downes, H., Dupuy, C. & Leyreloup, A.F. 1990. Crustal evolution of the Hercynian belt of Western Europe: Evidence from lower-crustal granulitic xenoliths (French Massif Central). Chemical Geology, 83, 209–231, https://doi.org/10.1016/0009-2541(90)90281-B.",Natural s-type granite,-1,-1,-1,-1,-1,-1,-1,-1,-1,69.35,0.44,15.85,2.7,1.52,1.86,3.62,4.67,2,20,47,0.5,Natural,Natural,Natural,Natural,Natural,Nat,1.154310495,0.116657952,0.037622745,0.310837325,0.099142083,0.033129116,0.00553244,0.03760603,4.22,3.52,1.25,50.01110925
AS24_74,AS24,"Downes, H., Dupuy, C. & Leyreloup, A.F. 1990. Crustal evolution of the Hercynian belt of Western Europe: Evidence from lower-crustal granulitic xenoliths (French Massif Central). Chemical Geology, 83, 209–231, https://doi.org/10.1016/0009-2541(90)90281-B.",Natural s-type granite,-1,-1,-1,-1,-1,-1,-1,-1,-1,69.06,0.48,16.18,2.77,1.53,1.99,3.43,4.57,2,20,47,0.5,Natural,Natural,Natural,Natural,Natural,Nat,1.149454597,0.110693325,0.037937816,0.31729806,0.096965256,0.03551882,0.00597032,0.038553423,4.3,3.12,1.3,49.59759683
AS63_75,AS63,"Downes, H., Dupuy, C. & Leyreloup, A.F. 1990. Crustal evolution of the Hercynian belt of Western Europe: Evidence from lower-crustal granulitic xenoliths (French Massif Central). Chemical Geology, 83, 209–231, https://doi.org/10.1016/0009-2541(90)90281-B.",Natural s-type granite,-1,-1,-1,-1,-1,-1,-1,-1,-1,68.01,0.56,16.14,3.11,1.8,2.24,3.38,4.76,2,20,47,0.5,Natural,Natural,Natural,Natural,Natural,Nat,1.13203984,0.109005638,0.044650302,0.316518457,0.100963423,0.039979819,0.007061952,0.043315426,4.91,2.73,1.27,50.75874813
AS78_76,AS78,"Downes, H., Dupuy, C. & Leyreloup, A.F. 1990. Crustal evolution of the Hercynian belt of Western Europe: Evidence from lower-crustal granulitic xenoliths (French Massif Central). Chemical Geology, 83, 209–231, https://doi.org/10.1016/0009-2541(90)90281-B.",Natural s-type granite,-1,-1,-1,-1,-1,-1,-1,-1,-1,68.28,0.5,16.23,3.04,1.89,1.85,3.43,4.78,2,20,47,0.5,Natural,Natural,Natural,Natural,Natural,Nat,1.136513892,0.110673827,0.046802527,0.318373104,0.101516724,0.032918753,0.006302586,0.042323861,4.93,3.36,1.3,52.51253675
AS23_77,AS23,"Downes, H., Dupuy, C. & Leyreloup, A.F. 1990. Crustal evolution of the Hercynian belt of Western Europe: Evidence from lower-crustal granulitic xenoliths (French Massif Central). Chemical Geology, 83, 209–231, https://doi.org/10.1016/0009-2541(90)90281-B.",Natural s-type granite,-1,-1,-1,-1,-1,-1,-1,-1,-1,67.74,0.57,16.65,3.44,1.72,2.8,3.61,3.48,2,20,47,0.5,Natural,Natural,Natural,Natural,Natural,Nat,1.127469823,0.116348453,0.042599353,0.326683627,0.073978366,0.04988827,0.007106912,0.047814394,5.15,2.33,1.36,47.1160134
AS64_78,AS64,"Downes, H., Dupuy, C. & Leyreloup, A.F. 1990. Crustal evolution of the Hercynian belt of Western Europe: Evidence from lower-crustal granulitic xenoliths (French Massif Central). Chemical Geology, 83, 209–231, https://doi.org/10.1016/0009-2541(90)90281-B.",Natural s-type granite,-1,-1,-1,-1,-1,-1,-1,-1,-1,67.54,0.63,16.34,3.62,1.77,2.31,3.24,4.54,2,20,47,0.5,Natural,Natural,Natural,Natural,Natural,Nat,1.124109774,0.104628998,0.043971426,0.320574542,0.096419745,0.041120459,0.00794308,0.050446454,5.4,2.54,1.32,46.57107949
AS79_79,AS79,"Downes, H., Dupuy, C. & Leyreloup, A.F. 1990. Crustal evolution of the Hercynian belt of Western Europe: Evidence from lower-crustal granulitic xenoliths (French Massif Central). Chemical Geology, 83, 209–231, https://doi.org/10.1016/0009-2541(90)90281-B.",Natural s-type granite,-1,-1,-1,-1,-1,-1,-1,-1,-1,66.71,0.6,16.45,3.88,2.6,2.5,3.6,3.65,2,20,47,0.5,Natural,Natural,Natural,Natural,Natural,Nat,1.110404202,0.116242193,0.064522117,0.322736924,0.077555792,0.044569425,0.007513127,0.053988077,6.48,2.61,1.35,54.44436046
AS68_80,AS68,"Downes, H., Dupuy, C. & Leyreloup, A.F. 1990. Crustal evolution of the Hercynian belt of Western Europe: Evidence from lower-crustal granulitic xenoliths (French Massif Central). Chemical Geology, 83, 209–231, https://doi.org/10.1016/0009-2541(90)90281-B.",Natural s-type granite,-1,-1,-1,-1,-1,-1,-1,-1,-1,64.25,0.76,16.63,4.53,2.88,3.35,3.1,4.5,2,20,47,0.5,Natural,Natural,Natural,Natural,Natural,Nat,1.069404854,0.099877776,0.071524361,0.326184686,0.095565402,0.059703764,0.009536623,0.063088651,7.42,1.67,1.28,53.13331896
MG11_81,MG11,"Downes, H., Dupuy, C. & Leyreloup, A.F. 1990. Crustal evolution of the Hercynian belt of Western Europe: Evidence from lower-crustal granulitic xenoliths (French Massif Central). Chemical Geology, 83, 209–231, https://doi.org/10.1016/0009-2541(90)90281-B.",Natural s-type granite,-1,-1,-1,-1,-1,-1,-1,-1,-1,73.87,0.21,14.46,1.51,0.71,0.81,3.38,5.04,2,20,47,0.5,Natural,Natural,Natural,Natural,Natural,Nat,1.229564052,0.108958167,0.017702742,0.283658382,0.107106905,0.014515494,0.002604612,0.021018971,2.22,7.51,1.23,45.71786991
MG5_82,MG5,"Downes, H., Dupuy, C. & Leyreloup, A.F. 1990. Crustal evolution of the Hercynian belt of Western Europe: Evidence from lower-crustal granulitic xenoliths (French Massif Central). Chemical Geology, 83, 209–231, https://doi.org/10.1016/0009-2541(90)90281-B.",Natural s-type granite,-1,-1,-1,-1,-1,-1,-1,-1,-1,72.73,0.33,14.69,2.06,1.17,1.08,3.42,4.52,2,20,47,0.5,Natural,Natural,Natural,Natural,Natural,Nat,1.210633802,0.110302581,0.029099052,0.288060187,0.095984494,0.019305512,0.004116777,0.028624678,3.23,5.71,1.28,50.41090106
MG31_83,MG31,"Downes, H., Dupuy, C. & Leyreloup, A.F. 1990. Crustal evolution of the Hercynian belt of Western Europe: Evidence from lower-crustal granulitic xenoliths (French Massif Central). Chemical Geology, 83, 209–231, https://doi.org/10.1016/0009-2541(90)90281-B.",Natural s-type granite,-1,-1,-1,-1,-1,-1,-1,-1,-1,71.16,0.37,15.09,2.18,1.45,1.03,3.28,5.46,2,20,47,0.5,Natural,Natural,Natural,Natural,Natural,Nat,1.184355326,0.105741016,0.035912866,0.295951735,0.115882792,0.018283205,0.00461896,0.030340126,3.63,5.78,1.23,54.20565117
MG13_84,MG13,"Downes, H., Dupuy, C. & Leyreloup, A.F. 1990. Crustal evolution of the Hercynian belt of Western Europe: Evidence from lower-crustal granulitic xenoliths (French Massif Central). Chemical Geology, 83, 209–231, https://doi.org/10.1016/0009-2541(90)90281-B.",Natural s-type granite,-1,-1,-1,-1,-1,-1,-1,-1,-1,71.06,0.42,14.89,2.57,1.57,1.44,3,5.05,2,20,47,0.5,Natural,Natural,Natural,Natural,Natural,Nat,1.182761289,0.096747541,0.038941256,0.292078577,0.107231068,0.025655825,0.005278249,0.035786273,4.14,3.77,1.27,52.11099126
MG28_85,MG28,"Downes, H., Dupuy, C. & Leyreloup, A.F. 1990. Crustal evolution of the Hercynian belt of Western Europe: Evidence from lower-crustal granulitic xenoliths (French Massif Central). Chemical Geology, 83, 209–231, https://doi.org/10.1016/0009-2541(90)90281-B.",Natural s-type granite,-1,-1,-1,-1,-1,-1,-1,-1,-1,66.43,0.67,16.22,3.97,2.63,2.44,3.07,4.56,2,20,47,0.5,Natural,Natural,Natural,Natural,Natural,Nat,1.105755741,0.098942499,0.065279269,0.318191144,0.096896933,0.043489415,0.008451198,0.055258768,6.6,2.28,1.33,54.15657233
MG22_86,MG22,"Downes, H., Dupuy, C. & Leyreloup, A.F. 1990. Crustal evolution of the Hercynian belt of Western Europe: Evidence from lower-crustal granulitic xenoliths (French Massif Central). Chemical Geology, 83, 209–231, https://doi.org/10.1016/0009-2541(90)90281-B.",Natural s-type granite,-1,-1,-1,-1,-1,-1,-1,-1,-1,66.52,0.67,16.08,4.04,2.61,2.14,3.05,4.88,2,20,47,0.5,Natural,Natural,Natural,Natural,Natural,Nat,1.107233314,0.098546074,0.064803846,0.315479681,0.103656193,0.038156772,0.008339336,0.056240313,6.65,2.58,1.31,53.5373591
MI19_87,MI19,"Downes, H., Dupuy, C. & Leyreloup, A.F. 1990. Crustal evolution of the Hercynian belt of Western Europe: Evidence from lower-crustal granulitic xenoliths (French Massif Central). Chemical Geology, 83, 209–231, https://doi.org/10.1016/0009-2541(90)90281-B.",Natural s-type granite,-1,-1,-1,-1,-1,-1,-1,-1,-1,69.27,0.31,16.41,1.65,0.7,1.43,3.32,6.91,2,20,47,0.5,Natural,Natural,Natural,Natural,Natural,Nat,1.152899914,0.10714711,0.017475365,0.321910245,0.146762972,0.025478928,0.003867739,0.022935719,2.35,4.21,1.15,43.2439888
MI11_88,MI11,"Downes, H., Dupuy, C. & Leyreloup, A.F. 1990. Crustal evolution of the Hercynian belt of Western Europe: Evidence from lower-crustal granulitic xenoliths (French Massif Central). Chemical Geology, 83, 209–231, https://doi.org/10.1016/0009-2541(90)90281-B.",Natural s-type granite,-1,-1,-1,-1,-1,-1,-1,-1,-1,71.48,0.29,15.06,1.73,1.04,1.7,3.55,5.16,2,20,47,0.5,Natural,Natural,Natural,Natural,Natural,Nat,1.189682401,0.114578796,0.025881892,0.295322138,0.109460482,0.030228318,0.003642094,0.024119966,2.78,3.79,1.16,51.76186109
MI9_89,MI9,"Downes, H., Dupuy, C. & Leyreloup, A.F. 1990. Crustal evolution of the Hercynian belt of Western Europe: Evidence from lower-crustal granulitic xenoliths (French Massif Central). Chemical Geology, 83, 209–231, https://doi.org/10.1016/0009-2541(90)90281-B.",Natural s-type granite,-1,-1,-1,-1,-1,-1,-1,-1,-1,70.75,0.44,15.27,1.95,1.08,1.49,3.21,5.81,2,20,47,0.5,Natural,Natural,Natural,Natural,Natural,Nat,1.177523042,0.103545765,0.026788641,0.299473548,0.123401644,0.026631352,0.005521269,0.027171783,3.03,3.89,1.18,49.64497879
MI16_90,MI16,"Downes, H., Dupuy, C. & Leyreloup, A.F. 1990. Crustal evolution of the Hercynian belt of Western Europe: Evidence from lower-crustal granulitic xenoliths (French Massif Central). Chemical Geology, 83, 209–231, https://doi.org/10.1016/0009-2541(90)90281-B.",Natural s-type granite,-1,-1,-1,-1,-1,-1,-1,-1,-1,69.77,0.37,15.86,2.27,1.29,1.85,3.85,4.73,2,20,47,0.5,Natural,Natural,Natural,Natural,Natural,Nat,1.161287063,0.124299194,0.032108129,0.311157732,0.100457515,0.032992916,0.004683788,0.031529504,3.56,3.77,1.21,50.45462432
MI4_91,MI4,"Downes, H., Dupuy, C. & Leyreloup, A.F. 1990. Crustal evolution of the Hercynian belt of Western Europe: Evidence from lower-crustal granulitic xenoliths (French Massif Central). Chemical Geology, 83, 209–231, https://doi.org/10.1016/0009-2541(90)90281-B.",Natural s-type granite,-1,-1,-1,-1,-1,-1,-1,-1,-1,67.83,0.54,16.22,3.03,1.95,2.58,3.78,4.06,2,20,47,0.5,Natural,Natural,Natural,Natural,Natural,Nat,1.129042814,0.122131747,0.048459169,0.318203394,0.086157796,0.046017543,0.006715604,0.042206142,4.99,2.65,1.25,53.44841189
BL111_92,BL111,"Euzen, T. 1993. Pétrogenèse Des Granites de Collision Post-Épaississement?: Le Cas Des Granites Crustaux et Mantelliques Du Complexe de Pontivy-Rostrenen ( Massif Armoricain France ). Université de Rennes.",Natural s-type granite,-1,-1,-1,-1,-1,-1,-1,-1,-1,75.75,0.08,14.85,0.71,0.11,0.42,3.81,4.28,2,20,47,0.5,Natural,Natural,Natural,Natural,Natural,Nat,1.260751549,0.122869461,0.002778604,0.291368072,0.090785164,0.007443591,0.001019799,0.009821383,0.82,16.51,1.32,22.05243757
BL100_93,BL100,"Euzen, T. 1993. Pétrogenèse Des Granites de Collision Post-Épaississement?: Le Cas Des Granites Crustaux et Mantelliques Du Complexe de Pontivy-Rostrenen ( Massif Armoricain France ). Université de Rennes.",Natural s-type granite,-1,-1,-1,-1,-1,-1,-1,-1,-1,75.69,0.14,14.86,0.61,0.19,0.47,3.46,4.58,2,20,47,0.5,Natural,Natural,Natural,Natural,Natural,Nat,1.259794794,0.111541331,0.004806749,0.291413719,0.097202113,0.00836412,0.001787378,0.00855895,0.81,13.34,1.34,35.96331636
BL116_94,BL116,"Euzen, T. 1993. Pétrogenèse Des Granites de Collision Post-Épaississement?: Le Cas Des Granites Crustaux et Mantelliques Du Complexe de Pontivy-Rostrenen ( Massif Armoricain France ). Université de Rennes.",Natural s-type granite,-1,-1,-1,-1,-1,-1,-1,-1,-1,76.25,0.12,14.55,0.79,0.15,0.46,3.41,4.27,2,20,47,0.5,Natural,Natural,Natural,Natural,Natural,Nat,1.269143546,0.109935925,0.003807574,0.285370656,0.090578411,0.008209831,0.001537195,0.011023092,0.95,13.39,1.37,25.67365441
BL53_95,BL53,"Euzen, T. 1993. Pétrogenèse Des Granites de Collision Post-Épaississement?: Le Cas Des Granites Crustaux et Mantelliques Du Complexe de Pontivy-Rostrenen ( Massif Armoricain France ). Université de Rennes.",Natural s-type granite,-1,-1,-1,-1,-1,-1,-1,-1,-1,74.79,0.17,15.29,0.8,0.21,0.56,3.7,4.47,2,20,47,0.5,Natural,Natural,Natural,Natural,Natural,Nat,1.244795192,0.119523397,0.005091402,0.299879179,0.094978533,0.010063167,0.002183971,0.011183418,1.01,11.88,1.34,31.28392276
BL129_96,BL129,"Euzen, T. 1993. Pétrogenèse Des Granites de Collision Post-Épaississement?: Le Cas Des Granites Crustaux et Mantelliques Du Complexe de Pontivy-Rostrenen ( Massif Armoricain France ). Université de Rennes.",Natural s-type granite,-1,-1,-1,-1,-1,-1,-1,-1,-1,75.41,0.15,14.55,0.91,0.2,0.51,3.57,4.7,2,20,47,0.5,Natural,Natural,Natural,Natural,Natural,Nat,1.255191779,0.115164854,0.005016917,0.285377918,0.099813997,0.009014498,0.001898842,0.012666448,1.11,12.78,1.27,28.37082887
BL126_97,BL126,"Euzen, T. 1993. Pétrogenèse Des Granites de Collision Post-Épaississement?: Le Cas Des Granites Crustaux et Mantelliques Du Complexe de Pontivy-Rostrenen ( Massif Armoricain France ). Université de Rennes.",Natural s-type granite,-1,-1,-1,-1,-1,-1,-1,-1,-1,74.9,0.13,15.02,0.91,0.2,0.51,3.5,4.82,2,20,47,0.5,Natural,Natural,Natural,Natural,Natural,Nat,1.246659071,0.113060994,0.005083682,0.294601518,0.102229866,0.009134462,0.001667563,0.012706662,1.12,12.38,1.31,28.5755129
BL198_98,BL198,"Euzen, T. 1993. Pétrogenèse Des Granites de Collision Post-Épaississement?: Le Cas Des Granites Crustaux et Mantelliques Du Complexe de Pontivy-Rostrenen ( Massif Armoricain France ). Université de Rennes.",Natural s-type granite,-1,-1,-1,-1,-1,-1,-1,-1,-1,75.8,0.14,14.35,0.98,0.19,0.52,3.27,4.73,2,20,47,0.5,Natural,Natural,Natural,Natural,Natural,Nat,1.261666633,0.105661839,0.004808708,0.281527969,0.100490349,0.009277043,0.001788107,0.013674344,1.18,11.39,1.31,26.0168514
BL199_99,BL199,"Euzen, T. 1993. Pétrogenèse Des Granites de Collision Post-Épaississement?: Le Cas Des Granites Crustaux et Mantelliques Du Complexe de Pontivy-Rostrenen ( Massif Armoricain France ). Université de Rennes.",Natural s-type granite,-1,-1,-1,-1,-1,-1,-1,-1,-1,74.39,0.17,15.3,1.02,0.3,0.57,3.34,4.92,2,20,47,0.5,Natural,Natural,Natural,Natural,Natural,Nat,1.238128986,0.107618498,0.007383517,0.300120408,0.10435958,0.010247499,0.002184262,0.014141837,1.31,10.5,1.35,34.30148742
BL117_100,BL117,"Euzen, T. 1993. Pétrogenèse Des Granites de Collision Post-Épaississement?: Le Cas Des Granites Crustaux et Mantelliques Du Complexe de Pontivy-Rostrenen ( Massif Armoricain France ). Université de Rennes.",Natural s-type granite,-1,-1,-1,-1,-1,-1,-1,-1,-1,75.49,0.17,14.65,1.11,0.34,0.38,3.25,4.61,2,20,47,0.5,Natural,Natural,Natural,Natural,Natural,Nat,1.256466187,0.104940871,0.0083209,0.28745791,0.097958873,0.006705369,0.002163196,0.015405991,1.44,15.65,1.37,35.0694919
BL164_101,BL164,"Euzen, T. 1993. Pétrogenèse Des Granites de Collision Post-Épaississement?: Le Cas Des Granites Crustaux et Mantelliques Du Complexe de Pontivy-Rostrenen ( Massif Armoricain France ). Université de Rennes.",Natural s-type granite,-1,-1,-1,-1,-1,-1,-1,-1,-1,74.1,0.26,15.25,1.09,0.35,0.44,2.28,6.24,2,20,47,0.5,Natural,Natural,Natural,Natural,Natural,Nat,1.233316105,0.073412601,0.008683983,0.299052689,0.132447633,0.007893563,0.003222334,0.015218433,1.44,9.3,1.4,36.33098346
BL30_102,BL30,"Euzen, T. 1993. Pétrogenèse Des Granites de Collision Post-Épaississement?: Le Cas Des Granites Crustaux et Mantelliques Du Complexe de Pontivy-Rostrenen ( Massif Armoricain France ). Université de Rennes.",Natural s-type granite,-1,-1,-1,-1,-1,-1,-1,-1,-1,74.66,0.15,15.32,1.03,0.39,0.81,4.53,3.11,2,20,47,0.5,Natural,Natural,Natural,Natural,Natural,Nat,1.242645556,0.146169163,0.009662261,0.300530809,0.065927918,0.014437329,0.001924762,0.014380073,1.42,10.12,1.33,40.18853177
BL119_103,BL119,"Euzen, T. 1993. Pétrogenèse Des Granites de Collision Post-Épaississement?: Le Cas Des Granites Crustaux et Mantelliques Du Complexe de Pontivy-Rostrenen ( Massif Armoricain France ). Université de Rennes.",Natural s-type granite,-1,-1,-1,-1,-1,-1,-1,-1,-1,74.91,0.2,15.21,1.1,0.39,0.38,3.07,4.73,2,20,47,0.5,Natural,Natural,Natural,Natural,Natural,Nat,1.246787701,0.099013701,0.009798937,0.29835747,0.100406722,0.006862187,0.002535916,0.015351387,1.5,14.43,1.45,38.9614739
BL1931_104,BL1931,"Euzen, T. 1993. Pétrogenèse Des Granites de Collision Post-Épaississement?: Le Cas Des Granites Crustaux et Mantelliques Du Complexe de Pontivy-Rostrenen ( Massif Armoricain France ). Université de Rennes.",Natural s-type granite,-1,-1,-1,-1,-1,-1,-1,-1,-1,74.13,0.19,15.25,1.14,0.39,0.55,3.02,5.32,2,20,47,0.5,Natural,Natural,Natural,Natural,Natural,Nat,1.233812667,0.097478411,0.009654543,0.299085555,0.113053239,0.009860671,0.002436084,0.015908077,1.53,9.89,1.36,37.76820486
BL97_105,BL97,"Euzen, T. 1993. Pétrogenèse Des Granites de Collision Post-Épaississement?: Le Cas Des Granites Crustaux et Mantelliques Du Complexe de Pontivy-Rostrenen ( Massif Armoricain France ). Université de Rennes.",Natural s-type granite,-1,-1,-1,-1,-1,-1,-1,-1,-1,74.21,0.21,15,1.22,0.37,0.65,3.56,4.77,2,20,47,0.5,Natural,Natural,Natural,Natural,Natural,Nat,1.235174216,0.114896172,0.009138828,0.294221634,0.101229123,0.011677035,0.002690282,0.017048554,1.59,9.84,1.29,34.89783025
BL196_106,BL196,"Euzen, T. 1993. Pétrogenèse Des Granites de Collision Post-Épaississement?: Le Cas Des Granites Crustaux et Mantelliques Du Complexe de Pontivy-Rostrenen ( Massif Armoricain France ). Université de Rennes.",Natural s-type granite,-1,-1,-1,-1,-1,-1,-1,-1,-1,74.1,0.22,15.51,1.27,0.39,0.62,2.8,5.09,2,20,47,0.5,Natural,Natural,Natural,Natural,Natural,Nat,1.233417876,0.090436811,0.009714526,0.304177547,0.108067854,0.011024372,0.002709242,0.017685058,1.66,8.2,1.45,35.45501305
BL172_107,BL172,"Euzen, T. 1993. Pétrogenèse Des Granites de Collision Post-Épaississement?: Le Cas Des Granites Crustaux et Mantelliques Du Complexe de Pontivy-Rostrenen ( Massif Armoricain France ). Université de Rennes.",Natural s-type granite,-1,-1,-1,-1,-1,-1,-1,-1,-1,73.32,0.15,15.82,1.19,0.48,0.37,2.53,6.14,2,20,47,0.5,Natural,Natural,Natural,Natural,Natural,Nat,1.220387148,0.081483159,0.011969949,0.310277088,0.130324833,0.006589638,0.001927863,0.016589452,1.67,12.37,1.42,41.91246466
BL8_108,BL8,"Euzen, T. 1993. Pétrogenèse Des Granites de Collision Post-Épaississement?: Le Cas Des Granites Crustaux et Mantelliques Du Complexe de Pontivy-Rostrenen ( Massif Armoricain France ). Université de Rennes.",Natural s-type granite,-1,-1,-1,-1,-1,-1,-1,-1,-1,74.25,0.27,15.06,1.31,0.43,0.79,3.23,4.67,2,20,47,0.5,Natural,Natural,Natural,Natural,Natural,Nat,1.235917752,0.104221378,0.010650763,0.295315873,0.099169739,0.01403417,0.003327326,0.018208699,1.74,7.43,1.36,36.9056183
BL22_109,BL22,"Euzen, T. 1993. Pétrogenèse Des Granites de Collision Post-Épaississement?: Le Cas Des Granites Crustaux et Mantelliques Du Complexe de Pontivy-Rostrenen ( Massif Armoricain France ). Université de Rennes.",Natural s-type granite,-1,-1,-1,-1,-1,-1,-1,-1,-1,73.12,0.24,15.66,1.4,0.45,0.68,3.48,4.97,2,20,47,0.5,Natural,Natural,Natural,Natural,Natural,Nat,1.21701692,0.112339352,0.011244226,0.307095265,0.105622292,0.012122311,0.002966165,0.01948506,1.85,9.27,1.33,36.59123815
BL16_110,BL16,"Euzen, T. 1993. Pétrogenèse Des Granites de Collision Post-Épaississement?: Le Cas Des Granites Crustaux et Mantelliques Du Complexe de Pontivy-Rostrenen ( Massif Armoricain France ). Université de Rennes.",Natural s-type granite,-1,-1,-1,-1,-1,-1,-1,-1,-1,73.87,0.26,15.56,1.45,0.43,0.55,3.27,4.61,2,20,47,0.5,Natural,Natural,Natural,Natural,Natural,Nat,1.229595506,0.105538247,0.010650522,0.305132782,0.097865514,0.009841922,0.003199279,0.02023143,1.88,10.72,1.43,34.48785197
BL72_111,BL72,"Euzen, T. 1993. Pétrogenèse Des Granites de Collision Post-Épaississement?: Le Cas Des Granites Crustaux et Mantelliques Du Complexe de Pontivy-Rostrenen ( Massif Armoricain France ). Université de Rennes.",Natural s-type granite,-1,-1,-1,-1,-1,-1,-1,-1,-1,72.83,0.25,15.72,1.4,0.49,0.76,3.47,5.09,2,20,47,0.5,Natural,Natural,Natural,Natural,Natural,Nat,1.212201184,0.111973505,0.012190415,0.308404785,0.108010308,0.013507456,0.003075948,0.019441258,1.89,8.29,1.32,38.53863565
BL193_112,BL193,"Euzen, T. 1993. Pétrogenèse Des Granites de Collision Post-Épaississement?: Le Cas Des Granites Crustaux et Mantelliques Du Complexe de Pontivy-Rostrenen ( Massif Armoricain France ). Université de Rennes.",Natural s-type granite,-1,-1,-1,-1,-1,-1,-1,-1,-1,73.01,0.26,15.89,1.49,0.5,0.48,3.02,5.34,2,20,47,0.5,Natural,Natural,Natural,Natural,Natural,Nat,1.215172012,0.097594661,0.01250652,0.311760816,0.113354647,0.008621898,0.003220112,0.020749813,1.99,11.32,1.42,37.60643188
BL6_113,BL6,"Euzen, T. 1993. Pétrogenèse Des Granites de Collision Post-Épaississement?: Le Cas Des Granites Crustaux et Mantelliques Du Complexe de Pontivy-Rostrenen ( Massif Armoricain France ). Université de Rennes.",Natural s-type granite,-1,-1,-1,-1,-1,-1,-1,-1,-1,73.27,0.32,15.67,1.67,0.51,0.54,3.14,4.89,2,20,47,0.5,Natural,Natural,Natural,Natural,Natural,Nat,1.219562106,0.101235989,0.0125464,0.307289299,0.10385632,0.009569538,0.004005671,0.023272521,2.18,10.58,1.43,35.02729635
BL4_114,BL4,"Euzen, T. 1993. Pétrogenèse Des Granites de Collision Post-Épaississement?: Le Cas Des Granites Crustaux et Mantelliques Du Complexe de Pontivy-Rostrenen ( Massif Armoricain France ). Université de Rennes.",Natural s-type granite,-1,-1,-1,-1,-1,-1,-1,-1,-1,72.15,0.31,16.73,1.66,0.56,0.46,3.05,5.07,2,20,47,0.5,Natural,Natural,Natural,Natural,Natural,Nat,1.20096912,0.098564993,0.01391973,0.328107048,0.107643653,0.008151815,0.003902553,0.023168875,2.23,12.09,1.53,37.53101501
BL145_115,BL145,"Euzen, T. 1993. Pétrogenèse Des Granites de Collision Post-Épaississement?: Le Cas Des Granites Crustaux et Mantelliques Du Complexe de Pontivy-Rostrenen ( Massif Armoricain France ). Université de Rennes.",Natural s-type granite,-1,-1,-1,-1,-1,-1,-1,-1,-1,72.62,0.33,15.96,1.62,0.6,0.84,3.52,4.5,2,20,47,0.5,Natural,Natural,Natural,Natural,Natural,Nat,1.208793855,0.113480356,0.014835593,0.313102179,0.095536082,0.015000149,0.004187525,0.022600643,2.22,7.57,1.4,39.6289652
BL151_116,BL151,"Euzen, T. 1993. Pétrogenèse Des Granites de Collision Post-Épaississement?: Le Cas Des Granites Crustaux et Mantelliques Du Complexe de Pontivy-Rostrenen ( Massif Armoricain France ). Université de Rennes.",Natural s-type granite,-1,-1,-1,-1,-1,-1,-1,-1,-1,71.34,0.52,16,2.54,1.05,1.54,4.11,2.89,2,20,47,0.5,Natural,Natural,Natural,Natural,Natural,Nat,1.187436558,0.132750412,0.02596291,0.313928266,0.0614234,0.027441576,0.006551095,0.035345472,3.59,4.84,1.42,42.34805927
83-38_117,83-38,"Georget, Y. & Martineau, F. 1986. Age tardi-hercynien et origine crustale du granite de Brignogan (Finistère, France). Conséquences sur l’interprétation des granites Nordarmoricains. Comptes rendus de l’Académie des sciences. Série 2, Mécanique, Physique, Chimie, Sciences de l'univers, Sciences de la Terre, 302, 237–242.",Natural s-type granite,-1,-1,-1,-1,-1,-1,-1,-1,-1,77.36,0.08,13.19,0.73,0.13,0.51,2.47,5.53,2,20,47,0.5,Natural,Natural,Natural,Natural,Natural,Nat,1.287557789,0.079684046,0.003291251,0.258802729,0.117421747,0.009098133,0.001022111,0.010096191,0.86,8.76,1.26,24.5846163
83-63b_118,83-63b,"Georget, Y. & Martineau, F. 1986. Age tardi-hercynien et origine crustale du granite de Brignogan (Finistère, France). Conséquences sur l’interprétation des granites Nordarmoricains. Comptes rendus de l’Académie des sciences. Série 2, Mécanique, Physique, Chimie, Sciences de l'univers, Sciences de la Terre, 302, 237–242.",Natural s-type granite,-1,-1,-1,-1,-1,-1,-1,-1,-1,74.13,0.1,15.31,1.01,0.17,0.62,3.29,5.37,2,20,47,0.5,Natural,Natural,Natural,Natural,Natural,Nat,1.233795434,0.106005198,0.004276542,0.300312504,0.114090967,0.011029054,0.001269505,0.014095471,1.19,9.61,1.3,23.2774828
83-47_119,83-47,"Georget, Y. & Martineau, F. 1986. Age tardi-hercynien et origine crustale du granite de Brignogan (Finistère, France). Conséquences sur l’interprétation des granites Nordarmoricains. Comptes rendus de l’Académie des sciences. Série 2, Mécanique, Physique, Chimie, Sciences de l'univers, Sciences de la Terre, 302, 237–242.",Natural s-type granite,-1,-1,-1,-1,-1,-1,-1,-1,-1,74.43,0.13,14.4,1.04,0.31,0.81,3.03,5.84,2,20,47,0.5,Natural,Natural,Natural,Natural,Natural,Nat,1.238911259,0.097691397,0.007761729,0.282470668,0.124052886,0.014396315,0.001642596,0.014534743,1.36,6.79,1.2,34.81146514
83-65_120,83-65,"Georget, Y. & Martineau, F. 1986. Age tardi-hercynien et origine crustale du granite de Brignogan (Finistère, France). Conséquences sur l’interprétation des granites Nordarmoricains. Comptes rendus de l’Académie des sciences. Série 2, Mécanique, Physique, Chimie, Sciences de l'univers, Sciences de la Terre, 302, 237–242.",Natural s-type granite,-1,-1,-1,-1,-1,-1,-1,-1,-1,73.32,0.18,15.58,1.2,0.36,0.87,3.38,5.11,2,20,47,0.5,Natural,Natural,Natural,Natural,Natural,Nat,1.220387572,0.108964508,0.009003356,0.305677915,0.108502927,0.015458416,0.002271773,0.01666436,1.56,7.05,1.31,35.0765771
8324A_121,8324A,"Georget, Y. & Martineau, F. 1986. Age tardi-hercynien et origine crustale du granite de Brignogan (Finistère, France). Conséquences sur l’interprétation des granites Nordarmoricains. Comptes rendus de l’Académie des sciences. Série 2, Mécanique, Physique, Chimie, Sciences de l'univers, Sciences de la Terre, 302, 237–242.",Natural s-type granite,-1,-1,-1,-1,-1,-1,-1,-1,-1,74.4,0.16,14.92,1.26,0.37,0.66,3.38,4.86,2,20,47,0.5,Natural,Natural,Natural,Natural,Natural,Nat,1.238354052,0.108979677,0.009058692,0.292636351,0.103140691,0.011755495,0.002031765,0.017528907,1.62,9.27,1.31,34.07111642
83-64_122,83-64,"Georget, Y. & Martineau, F. 1986. Age tardi-hercynien et origine crustale du granite de Brignogan (Finistère, France). Conséquences sur l’interprétation des granites Nordarmoricains. Comptes rendus de l’Académie des sciences. Série 2, Mécanique, Physique, Chimie, Sciences de l'univers, Sciences de la Terre, 302, 237–242.",Natural s-type granite,-1,-1,-1,-1,-1,-1,-1,-1,-1,73.37,0.19,15.29,1.31,0.37,0.61,3.39,5.47,2,20,47,0.5,Natural,Natural,Natural,Natural,Natural,Nat,1.221230445,0.109545976,0.009275142,0.299854381,0.116050672,0.010810224,0.002403604,0.018221919,1.68,10.13,1.27,33.73139431
83-97_123,83-97,"Georget, Y. & Martineau, F. 1986. Age tardi-hercynien et origine crustale du granite de Brignogan (Finistère, France). Conséquences sur l’interprétation des granites Nordarmoricains. Comptes rendus de l’Académie des sciences. Série 2, Mécanique, Physique, Chimie, Sciences de l'univers, Sciences de la Terre, 302, 237–242.",Natural s-type granite,-1,-1,-1,-1,-1,-1,-1,-1,-1,73.26,0.22,15.71,1.34,0.4,0.93,3.28,4.87,2,20,47,0.5,Natural,Natural,Natural,Natural,Natural,Nat,1.219362824,0.105855913,0.010017364,0.308074443,0.103293274,0.016559448,0.002780396,0.018583331,1.74,6.39,1.36,35.02489673
83-20b_124,83-20b,"Georget, Y. & Martineau, F. 1986. Age tardi-hercynien et origine crustale du granite de Brignogan (Finistère, France). Conséquences sur l’interprétation des granites Nordarmoricains. Comptes rendus de l’Académie des sciences. Série 2, Mécanique, Physique, Chimie, Sciences de l'univers, Sciences de la Terre, 302, 237–242.",Natural s-type granite,-1,-1,-1,-1,-1,-1,-1,-1,-1,73.76,0.24,15.38,1.4,0.4,0.44,3.01,5.37,2,20,47,0.5,Natural,Natural,Natural,Natural,Natural,Nat,1.227770407,0.097001037,0.009860085,0.301618459,0.114014009,0.007813563,0.003062089,0.019526313,1.8,12.41,1.38,33.5532272
83-80A_125,83-80A,"Georget, Y. & Martineau, F. 1986. Age tardi-hercynien et origine crustale du granite de Brignogan (Finistère, France). Conséquences sur l’interprétation des granites Nordarmoricains. Comptes rendus de l’Académie des sciences. Série 2, Mécanique, Physique, Chimie, Sciences de l'univers, Sciences de la Terre, 302, 237–242.",Natural s-type granite,-1,-1,-1,-1,-1,-1,-1,-1,-1,72.83,0.22,15.51,1.41,0.39,1.28,3.44,4.92,2,20,47,0.5,Natural,Natural,Natural,Natural,Natural,Nat,1.212226023,0.111041965,0.009793423,0.304145438,0.104432995,0.022740764,0.002787938,0.01964782,1.81,4.88,1.28,33.2642984
83-81_126,83-81,"Georget, Y. & Martineau, F. 1986. Age tardi-hercynien et origine crustale du granite de Brignogan (Finistère, France). Conséquences sur l’interprétation des granites Nordarmoricains. Comptes rendus de l’Académie des sciences. Série 2, Mécanique, Physique, Chimie, Sciences de l'univers, Sciences de la Terre, 302, 237–242.",Natural s-type granite,-1,-1,-1,-1,-1,-1,-1,-1,-1,73.18,0.22,15.45,1.35,0.44,1.11,3.42,4.82,2,20,47,0.5,Natural,Natural,Natural,Natural,Natural,Nat,1.218122191,0.110199354,0.010811334,0.303133063,0.102411645,0.019877791,0.002791413,0.018783881,1.79,5.54,1.3,36.53068308
83-32_127,83-32,"Georget, Y. & Martineau, F. 1986. Age tardi-hercynien et origine crustale du granite de Brignogan (Finistère, France). Conséquences sur l’interprétation des granites Nordarmoricains. Comptes rendus de l’Académie des sciences. Série 2, Mécanique, Physique, Chimie, Sciences de l'univers, Sciences de la Terre, 302, 237–242.",Natural s-type granite,-1,-1,-1,-1,-1,-1,-1,-1,-1,72.91,0.25,15.24,1.43,0.39,0.91,3.63,5.23,2,20,47,0.5,Natural,Natural,Natural,Natural,Natural,Nat,1.213600277,0.117186019,0.009761119,0.298986845,0.110942079,0.016189822,0.003157661,0.019962036,1.83,7.24,1.22,32.84011617
83-60b_128,83-60b,"Georget, Y. & Martineau, F. 1986. Age tardi-hercynien et origine crustale du granite de Brignogan (Finistère, France). Conséquences sur l’interprétation des granites Nordarmoricains. Comptes rendus de l’Académie des sciences. Série 2, Mécanique, Physique, Chimie, Sciences de l'univers, Sciences de la Terre, 302, 237–242.",Natural s-type granite,-1,-1,-1,-1,-1,-1,-1,-1,-1,74.06,0.24,14.84,1.45,0.39,0.63,2.76,5.63,2,20,47,0.5,Natural,Natural,Natural,Natural,Natural,Nat,1.232716806,0.088995874,0.009739701,0.291025544,0.119460508,0.011308009,0.003024703,0.020170365,1.84,7.87,1.32,32.56328749
83-70_129,83-70,"Georget, Y. & Martineau, F. 1986. Age tardi-hercynien et origine crustale du granite de Brignogan (Finistère, France). Conséquences sur l’interprétation des granites Nordarmoricains. Comptes rendus de l’Académie des sciences. Série 2, Mécanique, Physique, Chimie, Sciences de l'univers, Sciences de la Terre, 302, 237–242.",Natural s-type granite,-1,-1,-1,-1,-1,-1,-1,-1,-1,73.54,0.22,15.26,1.36,0.45,0.85,3.21,5.11,2,20,47,0.5,Natural,Natural,Natural,Natural,Natural,Nat,1.224053107,0.103448696,0.011075218,0.299295433,0.10855797,0.015196497,0.002794556,0.018932095,1.81,6.81,1.32,36.90839781
83-44_130,83-44,"Georget, Y. & Martineau, F. 1986. Age tardi-hercynien et origine crustale du granite de Brignogan (Finistère, France). Conséquences sur l’interprétation des granites Nordarmoricains. Comptes rendus de l’Académie des sciences. Série 2, Mécanique, Physique, Chimie, Sciences de l'univers, Sciences de la Terre, 302, 237–242.",Natural s-type granite,-1,-1,-1,-1,-1,-1,-1,-1,-1,73.95,0.24,14.79,1.46,0.42,0.97,3.39,4.79,2,20,47,0.5,Natural,Natural,Natural,Natural,Natural,Nat,1.230845969,0.109302301,0.010347385,0.290110733,0.10171833,0.017231971,0.00305667,0.020256138,1.87,6.34,1.27,33.81109094
83-88_131,83-88,"Georget, Y. & Martineau, F. 1986. Age tardi-hercynien et origine crustale du granite de Brignogan (Finistère, France). Conséquences sur l’interprétation des granites Nordarmoricains. Comptes rendus de l’Académie des sciences. Série 2, Mécanique, Physique, Chimie, Sciences de l'univers, Sciences de la Terre, 302, 237–242.",Natural s-type granite,-1,-1,-1,-1,-1,-1,-1,-1,-1,72.94,0.24,15.34,1.43,0.44,1.1,3.33,5.18,2,20,47,0.5,Natural,Natural,Natural,Natural,Natural,Nat,1.214069171,0.107558244,0.010908279,0.300837297,0.110059441,0.019691379,0.002944463,0.019848709,1.87,5.46,1.27,35.46601902
83-22_132,83-22,"Georget, Y. & Martineau, F. 1986. Age tardi-hercynien et origine crustale du granite de Brignogan (Finistère, France). Conséquences sur l’interprétation des granites Nordarmoricains. Comptes rendus de l’Académie des sciences. Série 2, Mécanique, Physique, Chimie, Sciences de l'univers, Sciences de la Terre, 302, 237–242.",Natural s-type granite,-1,-1,-1,-1,-1,-1,-1,-1,-1,72.86,0.26,15.21,1.52,0.46,0.95,3.39,5.35,2,20,47,0.5,Natural,Natural,Natural,Natural,Natural,Nat,1.212734374,0.109416682,0.011517648,0.298312763,0.11355686,0.016916028,0.003285261,0.021107422,1.98,6.47,1.24,35.30305886
83-52_133,83-52,"Georget, Y. & Martineau, F. 1986. Age tardi-hercynien et origine crustale du granite de Brignogan (Finistère, France). Conséquences sur l’interprétation des granites Nordarmoricains. Comptes rendus de l’Académie des sciences. Série 2, Mécanique, Physique, Chimie, Sciences de l'univers, Sciences de la Terre, 302, 237–242.",Natural s-type granite,-1,-1,-1,-1,-1,-1,-1,-1,-1,72.63,0.27,15.51,1.54,0.47,0.81,3.14,5.63,2,20,47,0.5,Natural,Natural,Natural,Natural,Natural,Nat,1.208952225,0.101238024,0.011550519,0.304325567,0.119467562,0.014437707,0.003421353,0.021421167,2,7.01,1.29,35.03162901
83-16_134,83-16,"Georget, Y. & Martineau, F. 1986. Age tardi-hercynien et origine crustale du granite de Brignogan (Finistère, France). Conséquences sur l’interprétation des granites Nordarmoricains. Comptes rendus de l’Académie des sciences. Série 2, Mécanique, Physique, Chimie, Sciences de l'univers, Sciences de la Terre, 302, 237–242.",Natural s-type granite,-1,-1,-1,-1,-1,-1,-1,-1,-1,71.94,0.26,15.98,1.54,0.49,1.23,3.3,5.26,2,20,47,0.5,Natural,Natural,Natural,Natural,Natural,Nat,1.197394551,0.106502024,0.012094208,0.313540427,0.111685682,0.021912208,0.003305979,0.021367723,2.02,4.86,1.31,36.14318589
83-76_135,83-76,"Georget, Y. & Martineau, F. 1986. Age tardi-hercynien et origine crustale du granite de Brignogan (Finistère, France). Conséquences sur l’interprétation des granites Nordarmoricains. Comptes rendus de l’Académie des sciences. Série 2, Mécanique, Physique, Chimie, Sciences de l'univers, Sciences de la Terre, 302, 237–242.",Natural s-type granite,-1,-1,-1,-1,-1,-1,-1,-1,-1,71.96,0.27,15.89,1.5,0.53,1.3,3.27,5.28,2,20,47,0.5,Natural,Natural,Natural,Natural,Natural,Nat,1.197685366,0.105425867,0.013049975,0.311698822,0.11210072,0.023268085,0.003419484,0.020902732,2.03,4.53,1.29,38.43574243
83-53_136,83-53,"Georget, Y. & Martineau, F. 1986. Age tardi-hercynien et origine crustale du granite de Brignogan (Finistère, France). Conséquences sur l’interprétation des granites Nordarmoricains. Comptes rendus de l’Académie des sciences. Série 2, Mécanique, Physique, Chimie, Sciences de l'univers, Sciences de la Terre, 302, 237–242.",Natural s-type granite,-1,-1,-1,-1,-1,-1,-1,-1,-1,73.46,0.28,14.98,1.59,0.48,1.11,3.34,4.75,2,20,47,0.5,Natural,Natural,Natural,Natural,Natural,Nat,1.222784322,0.107830634,0.011808311,0.293772211,0.100831053,0.019863107,0.003550083,0.022194263,2.07,5.43,1.29,34.72769649
83-68_137,83-68,"Georget, Y. & Martineau, F. 1986. Age tardi-hercynien et origine crustale du granite de Brignogan (Finistère, France). Conséquences sur l’interprétation des granites Nordarmoricains. Comptes rendus de l’Académie des sciences. Série 2, Mécanique, Physique, Chimie, Sciences de l'univers, Sciences de la Terre, 302, 237–242.",Natural s-type granite,-1,-1,-1,-1,-1,-1,-1,-1,-1,72.76,0.29,15.3,1.57,0.5,1.15,3.38,5.06,2,20,47,0.5,Natural,Natural,Natural,Natural,Natural,Nat,1.210985704,0.109076166,0.012377973,0.300168474,0.107433917,0.02051618,0.003569456,0.021805314,2.07,5.32,1.27,36.2105997
83-60_138,83-60,"Georget, Y. & Martineau, F. 1986. Age tardi-hercynien et origine crustale du granite de Brignogan (Finistère, France). Conséquences sur l’interprétation des granites Nordarmoricains. Comptes rendus de l’Académie des sciences. Série 2, Mécanique, Physique, Chimie, Sciences de l'univers, Sciences de la Terre, 302, 237–242.",Natural s-type granite,-1,-1,-1,-1,-1,-1,-1,-1,-1,72.91,0.28,15.61,1.6,0.5,0.36,2.75,5.98,2,20,47,0.5,Natural,Natural,Natural,Natural,Natural,Nat,1.213540477,0.088725416,0.012519718,0.306231811,0.127029959,0.006427338,0.003481391,0.022312968,2.11,13.8,1.38,35.94244217
83-20_139,83-20,"Georget, Y. & Martineau, F. 1986. Age tardi-hercynien et origine crustale du granite de Brignogan (Finistère, France). Conséquences sur l’interprétation des granites Nordarmoricains. Comptes rendus de l’Académie des sciences. Série 2, Mécanique, Physique, Chimie, Sciences de l'univers, Sciences de la Terre, 302, 237–242.",Natural s-type granite,-1,-1,-1,-1,-1,-1,-1,-1,-1,72.27,0.28,15.52,1.58,0.53,1.09,3.12,5.6,2,20,47,0.5,Natural,Natural,Natural,Natural,Natural,Nat,1.202975828,0.100763594,0.013037977,0.304474344,0.118863408,0.019462347,0.003542872,0.022022615,2.11,5.18,1.27,37.18698474
83-63_140,83-63,"Georget, Y. & Martineau, F. 1986. Age tardi-hercynien et origine crustale du granite de Brignogan (Finistère, France). Conséquences sur l’interprétation des granites Nordarmoricains. Comptes rendus de l’Académie des sciences. Série 2, Mécanique, Physique, Chimie, Sciences de l'univers, Sciences de la Terre, 302, 237–242.",Natural s-type granite,-1,-1,-1,-1,-1,-1,-1,-1,-1,72.43,0.3,15.57,1.65,0.48,0.83,2.98,5.75,2,20,47,0.5,Natural,Natural,Natural,Natural,Natural,Nat,1.205567411,0.096176886,0.012032382,0.305397622,0.122054614,0.014773685,0.003795091,0.023030032,2.14,6.51,1.31,34.3170386
83-0_141,83-0,"Georget, Y. & Martineau, F. 1986. Age tardi-hercynien et origine crustale du granite de Brignogan (Finistère, France). Conséquences sur l’interprétation des granites Nordarmoricains. Comptes rendus de l’Académie des sciences. Série 2, Mécanique, Physique, Chimie, Sciences de l'univers, Sciences de la Terre, 302, 237–242.",Natural s-type granite,-1,-1,-1,-1,-1,-1,-1,-1,-1,71.96,0.3,15.44,1.65,0.52,1.33,3.39,5.41,2,20,47,0.5,Natural,Natural,Natural,Natural,Natural,Nat,1.197744224,0.109471096,0.012814053,0.302927582,0.114812495,0.023656595,0.003803892,0.022956607,2.17,4.63,1.22,35.82280353
83-3_142,83-3,"Georget, Y. & Martineau, F. 1986. Age tardi-hercynien et origine crustale du granite de Brignogan (Finistère, France). Conséquences sur l’interprétation des granites Nordarmoricains. Comptes rendus de l’Académie des sciences. Série 2, Mécanique, Physique, Chimie, Sciences de l'univers, Sciences de la Terre, 302, 237–242.",Natural s-type granite,-1,-1,-1,-1,-1,-1,-1,-1,-1,71.7,0.31,15.71,1.69,0.51,1.32,3.15,5.61,2,20,47,0.5,Natural,Natural,Natural,Natural,Natural,Nat,1.193365141,0.101754244,0.012538039,0.308079834,0.119092432,0.023609974,0.003922942,0.023544276,2.2,4.31,1.26,34.7484335
83-99_143,83-99,"Georget, Y. & Martineau, F. 1986. Age tardi-hercynien et origine crustale du granite de Brignogan (Finistère, France). Conséquences sur l’interprétation des granites Nordarmoricains. Comptes rendus de l’Académie des sciences. Série 2, Mécanique, Physique, Chimie, Sciences de l'univers, Sciences de la Terre, 302, 237–242.",Natural s-type granite,-1,-1,-1,-1,-1,-1,-1,-1,-1,71.91,0.31,15.56,1.75,0.53,1.5,3.48,4.97,2,20,47,0.5,Natural,Natural,Natural,Natural,Natural,Nat,1.196876003,0.112220079,0.01304299,0.305186321,0.105601593,0.026680878,0.003923973,0.02431016,2.27,4.21,1.25,34.9180457
83-78_144,83-78,"Georget, Y. & Martineau, F. 1986. Age tardi-hercynien et origine crustale du granite de Brignogan (Finistère, France). Conséquences sur l’interprétation des granites Nordarmoricains. Comptes rendus de l’Académie des sciences. Série 2, Mécanique, Physique, Chimie, Sciences de l'univers, Sciences de la Terre, 302, 237–242.",Natural s-type granite,-1,-1,-1,-1,-1,-1,-1,-1,-1,72.2,0.3,15.36,1.65,0.58,1.58,3.33,5,2,20,47,0.5,Natural,Natural,Natural,Natural,Natural,Nat,1.201667413,0.107340034,0.014461836,0.301211402,0.106256699,0.028135826,0.003774915,0.023033466,2.24,3.82,1.25,38.5697277
8309B_145,8309B,"Georget, Y. & Martineau, F. 1986. Age tardi-hercynien et origine crustale du granite de Brignogan (Finistère, France). Conséquences sur l’interprétation des granites Nordarmoricains. Comptes rendus de l’Académie des sciences. Série 2, Mécanique, Physique, Chimie, Sciences de l'univers, Sciences de la Terre, 302, 237–242.",Natural s-type granite,-1,-1,-1,-1,-1,-1,-1,-1,-1,72.08,0.3,15.78,1.72,0.57,1.15,3.29,5.11,2,20,47,0.5,Natural,Natural,Natural,Natural,Natural,Nat,1.199741668,0.106217513,0.014115648,0.309483066,0.108495655,0.020471791,0.003816143,0.023921226,2.29,5.19,1.32,37.11043242
83-37_146,83-37,"Georget, Y. & Martineau, F. 1986. Age tardi-hercynien et origine crustale du granite de Brignogan (Finistère, France). Conséquences sur l’interprétation des granites Nordarmoricains. Comptes rendus de l’Académie des sciences. Série 2, Mécanique, Physique, Chimie, Sciences de l'univers, Sciences de la Terre, 302, 237–242.",Natural s-type granite,-1,-1,-1,-1,-1,-1,-1,-1,-1,71.83,0.31,15.72,1.71,0.6,1.09,3.02,5.72,2,20,47,0.5,Natural,Natural,Natural,Natural,Natural,Nat,1.195654761,0.097538969,0.014795189,0.308356163,0.12136651,0.019434035,0.003861929,0.023821934,2.31,5.02,1.29,38.31250935
83-03_147,83-03,"Georget, Y. & Martineau, F. 1986. Age tardi-hercynien et origine crustale du granite de Brignogan (Finistère, France). Conséquences sur l’interprétation des granites Nordarmoricains. Comptes rendus de l’Académie des sciences. Série 2, Mécanique, Physique, Chimie, Sciences de l'univers, Sciences de la Terre, 302, 237–242.",Natural s-type granite,-1,-1,-1,-1,-1,-1,-1,-1,-1,72.08,0.33,15.74,1.78,0.56,1.08,2.97,5.45,2,20,47,0.5,Natural,Natural,Natural,Natural,Natural,Nat,1.199797851,0.095998872,0.013950749,0.308821963,0.115689406,0.019324367,0.004096145,0.02471183,2.34,4.97,1.34,36.0833374
83-42_148,83-42,"Georget, Y. & Martineau, F. 1986. Age tardi-hercynien et origine crustale du granite de Brignogan (Finistère, France). Conséquences sur l’interprétation des granites Nordarmoricains. Comptes rendus de l’Académie des sciences. Série 2, Mécanique, Physique, Chimie, Sciences de l'univers, Sciences de la Terre, 302, 237–242.",Natural s-type granite,-1,-1,-1,-1,-1,-1,-1,-1,-1,71.75,0.33,15.52,1.78,0.61,1.27,3.14,5.6,2,20,47,0.5,Natural,Natural,Natural,Natural,Natural,Nat,1.194201407,0.101343217,0.01512289,0.30437246,0.118881324,0.022659613,0.004139266,0.024842585,2.39,4.47,1.25,37.8398857
83-06_149,83-06,"Georget, Y. & Martineau, F. 1986. Age tardi-hercynien et origine crustale du granite de Brignogan (Finistère, France). Conséquences sur l’interprétation des granites Nordarmoricains. Comptes rendus de l’Académie des sciences. Série 2, Mécanique, Physique, Chimie, Sciences de l'univers, Sciences de la Terre, 302, 237–242.",Natural s-type granite,-1,-1,-1,-1,-1,-1,-1,-1,-1,71.92,0.33,15.54,1.84,0.61,1.65,3.42,4.68,2,20,47,0.5,Natural,Natural,Natural,Natural,Natural,Nat,1.197020255,0.110259804,0.015093858,0.304890426,0.099454063,0.029471429,0.004189416,0.025651522,2.45,3.74,1.27,37.04434156
83-74_150,83-74,"Georget, Y. & Martineau, F. 1986. Age tardi-hercynien et origine crustale du granite de Brignogan (Finistère, France). Conséquences sur l’interprétation des granites Nordarmoricains. Comptes rendus de l’Académie des sciences. Série 2, Mécanique, Physique, Chimie, Sciences de l'univers, Sciences de la Terre, 302, 237–242.",Natural s-type granite,-1,-1,-1,-1,-1,-1,-1,-1,-1,72.15,0.3,15.48,1.83,0.62,1.47,3.48,4.65,2,20,47,0.5,Natural,Natural,Natural,Natural,Natural,Nat,1.200944415,0.112375913,0.015277267,0.303734284,0.098798035,0.026280479,0.003791644,0.025537593,2.45,4.28,1.28,37.4306483
83-05_151,83-05,"Georget, Y. & Martineau, F. 1986. Age tardi-hercynien et origine crustale du granite de Brignogan (Finistère, France). Conséquences sur l’interprétation des granites Nordarmoricains. Comptes rendus de l’Académie des sciences. Série 2, Mécanique, Physique, Chimie, Sciences de l'univers, Sciences de la Terre, 302, 237–242.",Natural s-type granite,-1,-1,-1,-1,-1,-1,-1,-1,-1,71.64,0.36,15.68,1.85,0.64,1.32,3.06,5.44,2,20,47,0.5,Natural,Natural,Natural,Natural,Natural,Nat,1.192465111,0.098833542,0.015998249,0.307506775,0.11550952,0.023535767,0.004541355,0.025741592,2.49,4.2,1.29,38.32848495
83-4_152,83-4,"Georget, Y. & Martineau, F. 1986. Age tardi-hercynien et origine crustale du granite de Brignogan (Finistère, France). Conséquences sur l’interprétation des granites Nordarmoricains. Comptes rendus de l’Académie des sciences. Série 2, Mécanique, Physique, Chimie, Sciences de l'univers, Sciences de la Terre, 302, 237–242.",Natural s-type granite,-1,-1,-1,-1,-1,-1,-1,-1,-1,71.6,0.34,15.52,1.81,0.67,1.42,3.13,5.51,2,20,47,0.5,Natural,Natural,Natural,Natural,Natural,Nat,1.191680993,0.101023701,0.016499732,0.304440024,0.117080308,0.025359631,0.004227348,0.025243091,2.48,3.98,1.25,39.52711114
83-06b_153,83-06b,"Georget, Y. & Martineau, F. 1986. Age tardi-hercynien et origine crustale du granite de Brignogan (Finistère, France). Conséquences sur l’interprétation des granites Nordarmoricains. Comptes rendus de l’Académie des sciences. Série 2, Mécanique, Physique, Chimie, Sciences de l'univers, Sciences de la Terre, 302, 237–242.",Natural s-type granite,-1,-1,-1,-1,-1,-1,-1,-1,-1,72.42,0.38,15.22,2.01,0.62,1.28,3.12,4.95,2,20,47,0.5,Natural,Natural,Natural,Natural,Natural,Nat,1.205422656,0.100658912,0.01527866,0.298613482,0.105022675,0.022862502,0.004803188,0.027942193,2.62,4.4,1.31,35.35020528
82-243_154,82-243,"Georget, Y. & Martineau, F. 1986. Age tardi-hercynien et origine crustale du granite de Brignogan (Finistère, France). Conséquences sur l’interprétation des granites Nordarmoricains. Comptes rendus de l’Académie des sciences. Série 2, Mécanique, Physique, Chimie, Sciences de l'univers, Sciences de la Terre, 302, 237–242.",Natural s-type granite,-1,-1,-1,-1,-1,-1,-1,-1,-1,76.2,0.03,14.75,0.43,0.1,0.43,4.5,3.57,2,20,47,0.5,Natural,Natural,Natural,Natural,Natural,Nat,1.268274084,0.145061911,0.002523439,0.289276693,0.075793416,0.007617399,0.000382036,0.00598692,0.53,19.04,1.27,29.65138204
82-26_155,82-26,"Georget, Y. & Martineau, F. 1986. Age tardi-hercynien et origine crustale du granite de Brignogan (Finistère, France). Conséquences sur l’interprétation des granites Nordarmoricains. Comptes rendus de l’Académie des sciences. Série 2, Mécanique, Physique, Chimie, Sciences de l'univers, Sciences de la Terre, 302, 237–242.",Natural s-type granite,-1,-1,-1,-1,-1,-1,-1,-1,-1,75.62,0.06,15.25,0.63,0.18,0.45,3.79,4.02,2,20,47,0.5,Natural,Natural,Natural,Natural,Natural,Nat,1.258651046,0.122419042,0.004542285,0.299058461,0.085296357,0.007980298,0.000764088,0.00878949,0.81,15.34,1.39,34.07111642
82-26B_156,82-26B,"Georget, Y. & Martineau, F. 1986. Age tardi-hercynien et origine crustale du granite de Brignogan (Finistère, France). Conséquences sur l’interprétation des granites Nordarmoricains. Comptes rendus de l’Académie des sciences. Série 2, Mécanique, Physique, Chimie, Sciences de l'univers, Sciences de la Terre, 302, 237–242.",Natural s-type granite,-1,-1,-1,-1,-1,-1,-1,-1,-1,75.07,0.06,14.95,0.66,0.18,0.57,4.22,4.29,2,20,47,0.5,Natural,Natural,Natural,Natural,Natural,Nat,1.249499842,0.136212924,0.004520812,0.29327637,0.091125801,0.010108729,0.000760476,0.009128286,0.84,13.47,1.24,33.121692
82-27S_157,82-27S,"Georget, Y. & Martineau, F. 1986. Age tardi-hercynien et origine crustale du granite de Brignogan (Finistère, France). Conséquences sur l’interprétation des granites Nordarmoricains. Comptes rendus de l’Académie des sciences. Série 2, Mécanique, Physique, Chimie, Sciences de l'univers, Sciences de la Terre, 302, 237–242.",Natural s-type granite,-1,-1,-1,-1,-1,-1,-1,-1,-1,75.13,0.08,15.28,0.74,0.19,0.5,3.95,4.12,2,20,47,0.5,Natural,Natural,Natural,Natural,Natural,Nat,1.250562704,0.127430329,0.004592781,0.299760709,0.087554646,0.008985949,0.00103011,0.010304004,0.93,14.18,1.34,30.83068733
82-233_158,82-233,"Georget, Y. & Martineau, F. 1986. Age tardi-hercynien et origine crustale du granite de Brignogan (Finistère, France). Conséquences sur l’interprétation des granites Nordarmoricains. Comptes rendus de l’Académie des sciences. Série 2, Mécanique, Physique, Chimie, Sciences de l'univers, Sciences de la Terre, 302, 237–242.",Natural s-type granite,-1,-1,-1,-1,-1,-1,-1,-1,-1,75.17,0.12,14.75,0.73,0.29,0.58,3.72,4.65,2,20,47,0.5,Natural,Natural,Natural,Natural,Natural,Nat,1.251128798,0.119928766,0.007093192,0.289403746,0.098633994,0.010378226,0.001534106,0.010102376,1.01,11.56,1.26,41.25011644
82-24b_159,82-24b,"Georget, Y. & Martineau, F. 1986. Age tardi-hercynien et origine crustale du granite de Brignogan (Finistère, France). Conséquences sur l’interprétation des granites Nordarmoricains. Comptes rendus de l’Académie des sciences. Série 2, Mécanique, Physique, Chimie, Sciences de l'univers, Sciences de la Terre, 302, 237–242.",Natural s-type granite,-1,-1,-1,-1,-1,-1,-1,-1,-1,74.53,0.19,15,1.01,0.42,0.59,4.03,4.24,2,20,47,0.5,Natural,Natural,Natural,Natural,Natural,Nat,1.240429637,0.130044853,0.010300437,0.294157192,0.090077715,0.010472838,0.002408884,0.014076916,1.43,12.42,1.28,42.25412276
82-01_160,82-01,"Georget, Y. & Martineau, F. 1986. Age tardi-hercynien et origine crustale du granite de Brignogan (Finistère, France). Conséquences sur l’interprétation des granites Nordarmoricains. Comptes rendus de l’Académie des sciences. Série 2, Mécanique, Physique, Chimie, Sciences de l'univers, Sciences de la Terre, 302, 237–242.",Natural s-type granite,-1,-1,-1,-1,-1,-1,-1,-1,-1,74.06,0.19,15.17,1.09,0.42,0.8,3.5,4.77,2,20,47,0.5,Natural,Natural,Natural,Natural,Natural,Nat,1.232627321,0.113018611,0.010297206,0.297638988,0.101225054,0.014260253,0.002408129,0.015213515,1.51,7.93,1.3,40.3642299
82-260_161,82-260,"Georget, Y. & Martineau, F. 1986. Age tardi-hercynien et origine crustale du granite de Brignogan (Finistère, France). Conséquences sur l’interprétation des granites Nordarmoricains. Comptes rendus de l’Académie des sciences. Série 2, Mécanique, Physique, Chimie, Sciences de l'univers, Sciences de la Terre, 302, 237–242.",Natural s-type granite,-1,-1,-1,-1,-1,-1,-1,-1,-1,73.72,0.19,15.58,1.25,0.34,0.65,3.89,4.38,2,20,47,0.5,Natural,Natural,Natural,Natural,Natural,Nat,1.22695238,0.12562406,0.008507973,0.30565276,0.092932687,0.011510436,0.002399337,0.017431673,1.6,10.91,1.33,32.79911125
82-38_162,82-38,"Georget, Y. & Martineau, F. 1986. Age tardi-hercynien et origine crustale du granite de Brignogan (Finistère, France). Conséquences sur l’interprétation des granites Nordarmoricains. Comptes rendus de l’Académie des sciences. Série 2, Mécanique, Physique, Chimie, Sciences de l'univers, Sciences de la Terre, 302, 237–242.",Natural s-type granite,-1,-1,-1,-1,-1,-1,-1,-1,-1,74.28,0.17,14.76,1.18,0.42,0.85,4.18,4.17,2,20,47,0.5,Natural,Natural,Natural,Natural,Natural,Nat,1.236327305,0.134808934,0.010390607,0.289519307,0.088480745,0.015118188,0.002174185,0.016374943,1.6,8.92,1.21,38.82082343
82-8H_163,82-8H,"Georget, Y. & Martineau, F. 1986. Age tardi-hercynien et origine crustale du granite de Brignogan (Finistère, France). Conséquences sur l’interprétation des granites Nordarmoricains. Comptes rendus de l’Académie des sciences. Série 2, Mécanique, Physique, Chimie, Sciences de l'univers, Sciences de la Terre, 302, 237–242.",Natural s-type granite,-1,-1,-1,-1,-1,-1,-1,-1,-1,74.93,0.21,14.64,1.2,0.41,0.68,3.41,4.53,2,20,47,0.5,Natural,Natural,Natural,Natural,Natural,Nat,1.247144457,0.110143632,0.010172714,0.287116191,0.096190165,0.012063835,0.002566832,0.016689102,1.61,9.13,1.31,37.87053722
82-61_164,82-61,"Georget, Y. & Martineau, F. 1986. Age tardi-hercynien et origine crustale du granite de Brignogan (Finistère, France). Conséquences sur l’interprétation des granites Nordarmoricains. Comptes rendus de l’Académie des sciences. Série 2, Mécanique, Physique, Chimie, Sciences de l'univers, Sciences de la Terre, 302, 237–242.",Natural s-type granite,-1,-1,-1,-1,-1,-1,-1,-1,-1,73.93,0.2,15.32,1.16,0.44,0.8,3.74,4.42,2,20,47,0.5,Natural,Natural,Natural,Natural,Natural,Nat,1.230471155,0.120602441,0.010954306,0.30049542,0.093738158,0.014281558,0.002442646,0.01620316,1.61,8.44,1.31,40.33625915
82-02_165,82-02,"Georget, Y. & Martineau, F. 1986. Age tardi-hercynien et origine crustale du granite de Brignogan (Finistère, France). Conséquences sur l’interprétation des granites Nordarmoricains. Comptes rendus de l’Académie des sciences. Série 2, Mécanique, Physique, Chimie, Sciences de l'univers, Sciences de la Terre, 302, 237–242.",Natural s-type granite,-1,-1,-1,-1,-1,-1,-1,-1,-1,73.71,0.19,15.33,1.3,0.49,0.88,3.59,4.51,2,20,47,0.5,Natural,Natural,Natural,Natural,Natural,Nat,1.226936756,0.115825022,0.012144025,0.300630491,0.095691913,0.015638117,0.002425859,0.018135208,1.79,7.41,1.32,40.10677934
82-68_166,82-68,"Georget, Y. & Martineau, F. 1986. Age tardi-hercynien et origine crustale du granite de Brignogan (Finistère, France). Conséquences sur l’interprétation des granites Nordarmoricains. Comptes rendus de l’Académie des sciences. Série 2, Mécanique, Physique, Chimie, Sciences de l'univers, Sciences de la Terre, 302, 237–242.",Natural s-type granite,-1,-1,-1,-1,-1,-1,-1,-1,-1,74.18,0.19,15.21,1.26,0.56,0.7,3.78,4.11,2,20,47,0.5,Natural,Natural,Natural,Natural,Natural,Nat,1.234639481,0.122127025,0.013883316,0.298348836,0.087265673,0.012518267,0.00242033,0.017584191,1.82,9.76,1.34,44.11953026
82-56_167,82-56,"Georget, Y. & Martineau, F. 1986. Age tardi-hercynien et origine crustale du granite de Brignogan (Finistère, France). Conséquences sur l’interprétation des granites Nordarmoricains. Comptes rendus de l’Académie des sciences. Série 2, Mécanique, Physique, Chimie, Sciences de l'univers, Sciences de la Terre, 302, 237–242.",Natural s-type granite,-1,-1,-1,-1,-1,-1,-1,-1,-1,71.93,0.22,15.75,1.41,0.52,0.91,3.68,5.56,2,20,47,0.5,Natural,Natural,Natural,Natural,Natural,Nat,1.197313351,0.118861631,0.012911192,0.309026766,0.118065831,0.016193875,0.002810667,0.019680207,1.93,7.34,1.22,39.61533567
82-208_168,82-208,"Georget, Y. & Martineau, F. 1986. Age tardi-hercynien et origine crustale du granite de Brignogan (Finistère, France). Conséquences sur l’interprétation des granites Nordarmoricains. Comptes rendus de l’Académie des sciences. Série 2, Mécanique, Physique, Chimie, Sciences de l'univers, Sciences de la Terre, 302, 237–242.",Natural s-type granite,-1,-1,-1,-1,-1,-1,-1,-1,-1,73.98,0.19,14.69,1.51,0.61,0.93,3.69,4.4,2,20,47,0.5,Natural,Natural,Natural,Natural,Natural,Nat,1.231296996,0.119193016,0.015148064,0.288221049,0.09332998,0.016512463,0.00242075,0.021028224,2.12,7.22,1.26,41.87290846
82-28_169,82-28,"Georget, Y. & Martineau, F. 1986. Age tardi-hercynien et origine crustale du granite de Brignogan (Finistère, France). Conséquences sur l’interprétation des granites Nordarmoricains. Comptes rendus de l’Académie des sciences. Série 2, Mécanique, Physique, Chimie, Sciences de l'univers, Sciences de la Terre, 302, 237–242.",Natural s-type granite,-1,-1,-1,-1,-1,-1,-1,-1,-1,73.53,0.27,15.31,1.44,0.66,0.85,3.56,4.38,2,20,47,0.5,Natural,Natural,Natural,Natural,Natural,Nat,1.223830132,0.114759443,0.016450943,0.300320138,0.092996135,0.015227562,0.003396262,0.020005838,2.1,7.54,1.35,45.12450726
82-95_170,82-95,"Georget, Y. & Martineau, F. 1986. Age tardi-hercynien et origine crustale du granite de Brignogan (Finistère, France). Conséquences sur l’interprétation des granites Nordarmoricains. Comptes rendus de l’Académie des sciences. Série 2, Mécanique, Physique, Chimie, Sciences de l'univers, Sciences de la Terre, 302, 237–242.",Natural s-type granite,-1,-1,-1,-1,-1,-1,-1,-1,-1,74.39,0.24,15.15,1.58,0.6,0.36,3.05,4.63,2,20,47,0.5,Natural,Natural,Natural,Natural,Natural,Nat,1.238125452,0.098261266,0.01490475,0.297230704,0.098295988,0.006464417,0.002982738,0.022052529,2.19,15.2,1.46,40.32967399
82-74_171,82-74,"Georget, Y. & Martineau, F. 1986. Age tardi-hercynien et origine crustale du granite de Brignogan (Finistère, France). Conséquences sur l’interprétation des granites Nordarmoricains. Comptes rendus de l’Académie des sciences. Série 2, Mécanique, Physique, Chimie, Sciences de l'univers, Sciences de la Terre, 302, 237–242.",Natural s-type granite,-1,-1,-1,-1,-1,-1,-1,-1,-1,73.42,0.24,15.08,1.59,0.62,0.92,3.83,4.3,2,20,47,0.5,Natural,Natural,Natural,Natural,Natural,Nat,1.222020423,0.123588028,0.015367932,0.295846901,0.091396968,0.016383956,0.002972915,0.022109202,2.21,7.54,1.28,41.00615624
82-05_172,82-05,"Georget, Y. & Martineau, F. 1986. Age tardi-hercynien et origine crustale du granite de Brignogan (Finistère, France). Conséquences sur l’interprétation des granites Nordarmoricains. Comptes rendus de l’Académie des sciences. Série 2, Mécanique, Physique, Chimie, Sciences de l'univers, Sciences de la Terre, 302, 237–242.",Natural s-type granite,-1,-1,-1,-1,-1,-1,-1,-1,-1,72.06,0.27,16.06,1.56,0.64,1.13,3.78,4.5,2,20,47,0.5,Natural,Natural,Natural,Natural,Natural,Nat,1.199479346,0.121858075,0.015867686,0.315015679,0.095479105,0.020093733,0.003431843,0.021741122,2.2,6.06,1.33,42.19141028
82-3_173,82-3,"Georget, Y. & Martineau, F. 1986. Age tardi-hercynien et origine crustale du granite de Brignogan (Finistère, France). Conséquences sur l’interprétation des granites Nordarmoricains. Comptes rendus de l’Académie des sciences. Série 2, Mécanique, Physique, Chimie, Sciences de l'univers, Sciences de la Terre, 302, 237–242.",Natural s-type granite,-1,-1,-1,-1,-1,-1,-1,-1,-1,73.55,0.27,15.36,1.52,0.68,0.93,3.54,4.15,2,20,47,0.5,Natural,Natural,Natural,Natural,Natural,Nat,1.224146197,0.114259246,0.016806523,0.301375801,0.088033276,0.01665482,0.003341164,0.021209511,2.2,6.86,1.38,44.20903829
82-87_174,82-87,"Georget, Y. & Martineau, F. 1986. Age tardi-hercynien et origine crustale du granite de Brignogan (Finistère, France). Conséquences sur l’interprétation des granites Nordarmoricains. Comptes rendus de l’Académie des sciences. Série 2, Mécanique, Physique, Chimie, Sciences de l'univers, Sciences de la Terre, 302, 237–242.",Natural s-type granite,-1,-1,-1,-1,-1,-1,-1,-1,-1,74,0.22,14.74,1.66,0.62,0.95,3.84,3.96,2,20,47,0.5,Natural,Natural,Natural,Natural,Natural,Nat,1.231756614,0.123985244,0.015465846,0.28904252,0.084179652,0.016946944,0.002814862,0.02303717,2.28,7.32,1.28,40.16788214
82-86_175,82-86,"Georget, Y. & Martineau, F. 1986. Age tardi-hercynien et origine crustale du granite de Brignogan (Finistère, France). Conséquences sur l’interprétation des granites Nordarmoricains. Comptes rendus de l’Académie des sciences. Série 2, Mécanique, Physique, Chimie, Sciences de l'univers, Sciences de la Terre, 302, 237–242.",Natural s-type granite,-1,-1,-1,-1,-1,-1,-1,-1,-1,71.85,0.28,16.06,1.57,0.67,1.13,3.83,4.61,2,20,47,0.5,Natural,Natural,Natural,Natural,Natural,Nat,1.195897083,0.123517896,0.016714918,0.314950032,0.097955831,0.020204489,0.003450759,0.021860958,2.24,6.11,1.3,43.3299761
82-9_176,82-9,"Georget, Y. & Martineau, F. 1986. Age tardi-hercynien et origine crustale du granite de Brignogan (Finistère, France). Conséquences sur l’interprétation des granites Nordarmoricains. Comptes rendus de l’Académie des sciences. Série 2, Mécanique, Physique, Chimie, Sciences de l'univers, Sciences de la Terre, 302, 237–242.",Natural s-type granite,-1,-1,-1,-1,-1,-1,-1,-1,-1,72.34,0.28,15.42,1.6,0.74,1.3,3.83,4.49,2,20,47,0.5,Natural,Natural,Natural,Natural,Natural,Nat,1.204105927,0.123531905,0.018246522,0.302541566,0.095394567,0.023174562,0.003531879,0.022206631,2.33,5.33,1.25,45.10531489
82-24_177,82-24,"Georget, Y. & Martineau, F. 1986. Age tardi-hercynien et origine crustale du granite de Brignogan (Finistère, France). Conséquences sur l’interprétation des granites Nordarmoricains. Comptes rendus de l’Académie des sciences. Série 2, Mécanique, Physique, Chimie, Sciences de l'univers, Sciences de la Terre, 302, 237–242.",Natural s-type granite,-1,-1,-1,-1,-1,-1,-1,-1,-1,73.34,0.19,14.89,1.76,0.69,1.07,3.69,4.36,2,20,47,0.5,Natural,Natural,Natural,Natural,Natural,Nat,1.2207251,0.118991628,0.017233751,0.292133288,0.092604123,0.019126028,0.002430049,0.024435264,2.45,6.22,1.27,41.35867118
82-53_178,82-53,"Georget, Y. & Martineau, F. 1986. Age tardi-hercynien et origine crustale du granite de Brignogan (Finistère, France). Conséquences sur l’interprétation des granites Nordarmoricains. Comptes rendus de l’Académie des sciences. Série 2, Mécanique, Physique, Chimie, Sciences de l'univers, Sciences de la Terre, 302, 237–242.",Natural s-type granite,-1,-1,-1,-1,-1,-1,-1,-1,-1,72.59,0.29,15.52,1.82,0.73,0.99,3.88,4.18,2,20,47,0.5,Natural,Natural,Natural,Natural,Natural,Nat,1.208304728,0.125099811,0.018019282,0.304380862,0.08882475,0.01769357,0.003586144,0.025366298,2.55,7.07,1.31,41.53288231
82-228_179,82-228,"Georget, Y. & Martineau, F. 1986. Age tardi-hercynien et origine crustale du granite de Brignogan (Finistère, France). Conséquences sur l’interprétation des granites Nordarmoricains. Comptes rendus de l’Académie des sciences. Série 2, Mécanique, Physique, Chimie, Sciences de l'univers, Sciences de la Terre, 302, 237–242.",Natural s-type granite,-1,-1,-1,-1,-1,-1,-1,-1,-1,71.93,0.33,15.61,1.79,0.78,1.27,3.88,4.42,2,20,47,0.5,Natural,Natural,Natural,Natural,Natural,Nat,1.197305692,0.12516997,0.019248276,0.306152883,0.093842094,0.022571713,0.004089957,0.024930192,2.57,5.55,1.27,43.56936026
8273N_180,8273N,"Georget, Y. & Martineau, F. 1986. Age tardi-hercynien et origine crustale du granite de Brignogan (Finistère, France). Conséquences sur l’interprétation des granites Nordarmoricains. Comptes rendus de l’Académie des sciences. Série 2, Mécanique, Physique, Chimie, Sciences de l'univers, Sciences de la Terre, 302, 237–242.",Natural s-type granite,-1,-1,-1,-1,-1,-1,-1,-1,-1,72.58,0.32,15.21,1.74,0.8,1.22,3.82,4.31,2,20,47,0.5,Natural,Natural,Natural,Natural,Natural,Nat,1.208046503,0.123214836,0.019958161,0.298398511,0.091446133,0.021789098,0.003952261,0.024230356,2.55,5.65,1.26,45.16594391
82-230_181,82-230,"Georget, Y. & Martineau, F. 1986. Age tardi-hercynien et origine crustale du granite de Brignogan (Finistère, France). Conséquences sur l’interprétation des granites Nordarmoricains. Comptes rendus de l’Académie des sciences. Série 2, Mécanique, Physique, Chimie, Sciences de l'univers, Sciences de la Terre, 302, 237–242.",Natural s-type granite,-1,-1,-1,-1,-1,-1,-1,-1,-1,71.55,0.33,15.95,1.81,0.8,1.22,3.5,4.84,2,20,47,0.5,Natural,Natural,Natural,Natural,Natural,Nat,1.190942124,0.113081223,0.019829907,0.312944498,0.102683256,0.021743909,0.004105505,0.025153297,2.61,5.2,1.32,44.08291377
82-7_182,82-7,"Georget, Y. & Martineau, F. 1986. Age tardi-hercynien et origine crustale du granite de Brignogan (Finistère, France). Conséquences sur l’interprétation des granites Nordarmoricains. Comptes rendus de l’Académie des sciences. Série 2, Mécanique, Physique, Chimie, Sciences de l'univers, Sciences de la Terre, 302, 237–242.",Natural s-type granite,-1,-1,-1,-1,-1,-1,-1,-1,-1,71.82,0.35,16.18,1.8,0.8,1.11,3.71,4.23,2,20,47,0.5,Natural,Natural,Natural,Natural,Natural,Nat,1.195339179,0.119804213,0.019903121,0.317327659,0.089742869,0.019806828,0.004378204,0.025117358,2.61,6.05,1.38,44.20903829
82-20_183,82-20,"Georget, Y. & Martineau, F. 1986. Age tardi-hercynien et origine crustale du granite de Brignogan (Finistère, France). Conséquences sur l’interprétation des granites Nordarmoricains. Comptes rendus de l’Académie des sciences. Série 2, Mécanique, Physique, Chimie, Sciences de l'univers, Sciences de la Terre, 302, 237–242.",Natural s-type granite,-1,-1,-1,-1,-1,-1,-1,-1,-1,72.14,0.32,15.34,1.77,0.85,1.41,3.65,4.52,2,20,47,0.5,Natural,Natural,Natural,Natural,Natural,Nat,1.200734987,0.117663551,0.021033595,0.300924803,0.09606622,0.025135012,0.003964493,0.024689114,2.62,4.68,1.26,46.00251321
82-221_184,82-221,"Georget, Y. & Martineau, F. 1986. Age tardi-hercynien et origine crustale du granite de Brignogan (Finistère, France). Conséquences sur l’interprétation des granites Nordarmoricains. Comptes rendus de l’Académie des sciences. Série 2, Mécanique, Physique, Chimie, Sciences de l'univers, Sciences de la Terre, 302, 237–242.",Natural s-type granite,-1,-1,-1,-1,-1,-1,-1,-1,-1,72.27,0.31,15.43,1.93,0.78,1.15,4.07,4.07,2,20,47,0.5,Natural,Natural,Natural,Natural,Natural,Nat,1.202935626,0.131301179,0.019229634,0.302655782,0.08638968,0.020549462,0.003830621,0.026821897,2.7,6.39,1.27,41.7567745
82-206_185,82-206,"Georget, Y. & Martineau, F. 1986. Age tardi-hercynien et origine crustale du granite de Brignogan (Finistère, France). Conséquences sur l’interprétation des granites Nordarmoricains. Comptes rendus de l’Académie des sciences. Série 2, Mécanique, Physique, Chimie, Sciences de l'univers, Sciences de la Terre, 302, 237–242.",Natural s-type granite,-1,-1,-1,-1,-1,-1,-1,-1,-1,72.63,0.3,15.33,1.86,0.82,1.07,3.75,4.26,2,20,47,0.5,Natural,Natural,Natural,Natural,Natural,Nat,1.208806095,0.120933531,0.020269001,0.300660017,0.090408646,0.019120368,0.003707924,0.025834883,2.67,6.32,1.3,43.96376025
82-90_186,82-90,"Georget, Y. & Martineau, F. 1986. Age tardi-hercynien et origine crustale du granite de Brignogan (Finistère, France). Conséquences sur l’interprétation des granites Nordarmoricains. Comptes rendus de l’Académie des sciences. Série 2, Mécanique, Physique, Chimie, Sciences de l'univers, Sciences de la Terre, 302, 237–242.",Natural s-type granite,-1,-1,-1,-1,-1,-1,-1,-1,-1,71.59,0.38,15.67,2.09,0.72,1.23,3.74,4.59,2,20,47,0.5,Natural,Natural,Natural,Natural,Natural,Nat,1.191532587,0.120567055,0.017837021,0.307459247,0.097385372,0.021848113,0.004817682,0.029041044,2.81,5.52,1.28,38.0498233
82-318_187,82-318,"Georget, Y. & Martineau, F. 1986. Age tardi-hercynien et origine crustale du granite de Brignogan (Finistère, France). Conséquences sur l’interprétation des granites Nordarmoricains. Comptes rendus de l’Académie des sciences. Série 2, Mécanique, Physique, Chimie, Sciences de l'univers, Sciences de la Terre, 302, 237–242.",Natural s-type granite,-1,-1,-1,-1,-1,-1,-1,-1,-1,71.63,0.34,16.19,1.93,0.81,1.09,3.79,4.23,2,20,47,0.5,Natural,Natural,Natural,Natural,Natural,Nat,1.192239948,0.122222967,0.020155597,0.317502116,0.089902814,0.01937555,0.004195755,0.026834957,2.74,6.31,1.37,42.89286936
82-229_188,82-229,"Georget, Y. & Martineau, F. 1986. Age tardi-hercynien et origine crustale du granite de Brignogan (Finistère, France). Conséquences sur l’interprétation des granites Nordarmoricains. Comptes rendus de l’Académie des sciences. Série 2, Mécanique, Physique, Chimie, Sciences de l'univers, Sciences de la Terre, 302, 237–242.",Natural s-type granite,-1,-1,-1,-1,-1,-1,-1,-1,-1,72.41,0.34,15.24,1.89,0.84,1.51,3.55,4.21,2,20,47,0.5,Natural,Natural,Natural,Natural,Natural,Nat,1.205171466,0.114674538,0.020790461,0.299030578,0.089382733,0.027004856,0.004297892,0.026300386,2.73,4.25,1.29,44.1496852
82-73_189,82-73,"Georget, Y. & Martineau, F. 1986. Age tardi-hercynien et origine crustale du granite de Brignogan (Finistère, France). Conséquences sur l’interprétation des granites Nordarmoricains. Comptes rendus de l’Académie des sciences. Série 2, Mécanique, Physique, Chimie, Sciences de l'univers, Sciences de la Terre, 302, 237–242.",Natural s-type granite,-1,-1,-1,-1,-1,-1,-1,-1,-1,72.31,0.34,15.4,1.89,0.87,1.33,3.78,4.09,2,20,47,0.5,Natural,Natural,Natural,Natural,Natural,Nat,1.203566923,0.12184682,0.021600585,0.302029178,0.086832034,0.023648464,0.004309595,0.026245217,2.76,5.15,1.3,45.14624857
82-214_190,82-214,"Georget, Y. & Martineau, F. 1986. Age tardi-hercynien et origine crustale du granite de Brignogan (Finistère, France). Conséquences sur l’interprétation des granites Nordarmoricains. Comptes rendus de l’Académie des sciences. Série 2, Mécanique, Physique, Chimie, Sciences de l'univers, Sciences de la Terre, 302, 237–242.",Natural s-type granite,-1,-1,-1,-1,-1,-1,-1,-1,-1,72.62,0.21,15.2,2.04,0.81,1.19,3.73,4.2,2,20,47,0.5,Natural,Natural,Natural,Natural,Natural,Nat,1.208741884,0.120317297,0.020056418,0.29810129,0.0892459,0.021262288,0.002656888,0.028348115,2.85,5.66,1.29,41.43500009
82-30_191,82-30,"Georget, Y. & Martineau, F. 1986. Age tardi-hercynien et origine crustale du granite de Brignogan (Finistère, France). Conséquences sur l’interprétation des granites Nordarmoricains. Comptes rendus de l’Académie des sciences. Série 2, Mécanique, Physique, Chimie, Sciences de l'univers, Sciences de la Terre, 302, 237–242.",Natural s-type granite,-1,-1,-1,-1,-1,-1,-1,-1,-1,71.4,0.41,15.63,2.32,0.78,1.52,3.86,4.08,2,20,47,0.5,Natural,Natural,Natural,Natural,Natural,Nat,1.188396207,0.124610636,0.019366117,0.306617006,0.086566731,0.027105365,0.005143746,0.03228609,3.1,4.6,1.29,37.4933002
82-33_192,82-33,"Georget, Y. & Martineau, F. 1986. Age tardi-hercynien et origine crustale du granite de Brignogan (Finistère, France). Conséquences sur l’interprétation des granites Nordarmoricains. Comptes rendus de l’Académie des sciences. Série 2, Mécanique, Physique, Chimie, Sciences de l'univers, Sciences de la Terre, 302, 237–242.",Natural s-type granite,-1,-1,-1,-1,-1,-1,-1,-1,-1,72.23,0.32,15.93,1.96,1.07,0.91,3.36,4.23,2,20,47,0.5,Natural,Natural,Natural,Natural,Natural,Nat,1.202187754,0.108296917,0.026564003,0.312394318,0.089832515,0.016155018,0.00399588,0.027334354,3.03,6.7,1.46,49.28536695
82-287_193,82-287,"Georget, Y. & Martineau, F. 1986. Age tardi-hercynien et origine crustale du granite de Brignogan (Finistère, France). Conséquences sur l’interprétation des granites Nordarmoricains. Comptes rendus de l’Académie des sciences. Série 2, Mécanique, Physique, Chimie, Sciences de l'univers, Sciences de la Terre, 302, 237–242.",Natural s-type granite,-1,-1,-1,-1,-1,-1,-1,-1,-1,70.37,0.44,16.13,2.35,0.91,1.31,3.84,4.65,2,20,47,0.5,Natural,Natural,Natural,Natural,Natural,Nat,1.171335553,0.123831276,0.022669542,0.316429352,0.098718209,0.023353638,0.005465869,0.032677297,3.26,5.3,1.29,40.95905425
82-284_194,82-284,"Georget, Y. & Martineau, F. 1986. Age tardi-hercynien et origine crustale du granite de Brignogan (Finistère, France). Conséquences sur l’interprétation des granites Nordarmoricains. Comptes rendus de l’Académie des sciences. Série 2, Mécanique, Physique, Chimie, Sciences de l'univers, Sciences de la Terre, 302, 237–242.",Natural s-type granite,-1,-1,-1,-1,-1,-1,-1,-1,-1,71.42,0.41,15.71,2.41,0.89,1.31,3.51,4.34,2,20,47,0.5,Natural,Natural,Natural,Natural,Natural,Nat,1.18877544,0.113221753,0.022080896,0.308206141,0.092086264,0.0233492,0.005123278,0.033566921,3.3,4.85,1.35,39.67971668
82-276_195,82-276,"Georget, Y. & Martineau, F. 1986. Age tardi-hercynien et origine crustale du granite de Brignogan (Finistère, France). Conséquences sur l’interprétation des granites Nordarmoricains. Comptes rendus de l’Académie des sciences. Série 2, Mécanique, Physique, Chimie, Sciences de l'univers, Sciences de la Terre, 302, 237–242.",Natural s-type granite,-1,-1,-1,-1,-1,-1,-1,-1,-1,71.35,0.39,15.52,2.23,1.1,1.63,3.73,4.05,2,20,47,0.5,Natural,Natural,Natural,Natural,Natural,Nat,1.187563118,0.120318562,0.027327157,0.30444707,0.086028803,0.029010714,0.004934272,0.031006076,3.33,4.15,1.29,46.84663528
82-309_196,82-309,"Georget, Y. & Martineau, F. 1986. Age tardi-hercynien et origine crustale du granite de Brignogan (Finistère, France). Conséquences sur l’interprétation des granites Nordarmoricains. Comptes rendus de l’Académie des sciences. Série 2, Mécanique, Physique, Chimie, Sciences de l'univers, Sciences de la Terre, 302, 237–242.",Natural s-type granite,-1,-1,-1,-1,-1,-1,-1,-1,-1,72.12,0.37,14.96,2.13,1.21,1.3,3.73,4.18,2,20,47,0.5,Natural,Natural,Natural,Natural,Natural,Nat,1.200417636,0.120223502,0.030055014,0.293521515,0.088826664,0.023235099,0.004588418,0.029578131,3.34,5.17,1.26,50.39984718
82-23_197,82-23,"Georget, Y. & Martineau, F. 1986. Age tardi-hercynien et origine crustale du granite de Brignogan (Finistère, France). Conséquences sur l’interprétation des granites Nordarmoricains. Comptes rendus de l’Académie des sciences. Série 2, Mécanique, Physique, Chimie, Sciences de l'univers, Sciences de la Terre, 302, 237–242.",Natural s-type granite,-1,-1,-1,-1,-1,-1,-1,-1,-1,70.36,0.46,15.87,2.69,1.4,1.75,3.71,3.77,2,20,47,0.5,Natural,Natural,Natural,Natural,Natural,Nat,1.17118253,0.119627275,0.034651625,0.311218789,0.080017009,0.031131368,0.005786124,0.037427469,4.09,3.84,1.35,48.07444591
82-51_198,82-51,"Georget, Y. & Martineau, F. 1986. Age tardi-hercynien et origine crustale du granite de Brignogan (Finistère, France). Conséquences sur l’interprétation des granites Nordarmoricains. Comptes rendus de l’Académie des sciences. Série 2, Mécanique, Physique, Chimie, Sciences de l'univers, Sciences de la Terre, 302, 237–242.",Natural s-type granite,-1,-1,-1,-1,-1,-1,-1,-1,-1,70.35,0.48,15.76,2.68,1.53,1.71,3.73,3.75,2,20,47,0.5,Natural,Natural,Natural,Natural,Natural,Nat,1.170954828,0.120339271,0.038084369,0.30917513,0.079614731,0.030495318,0.00606246,0.037288173,4.21,3.95,1.34,50.52817347
GLW-38A_199,GLW-38A,"Goad, B.E. & Cerny, P. 1981. Peraluminous pegmatitic granites and their pegmatite aureoles in the Winnipeg River district, southeastern Manitoba. Canadian Mineralogist, 19, 177–194.",Natural s-type granite,-1,-1,-1,-1,-1,-1,-1,-1,-1,76.36,0.01,13.56,0.58,0.03,0.31,3.7,5.44,2,20,47,0.5,Natural,Natural,Natural,Natural,Natural,Nat,1.271006011,0.119472905,0.000748867,0.266027059,0.115561218,0.005561726,0.000125972,0.008051242,0.61,21.48,1.11,8.509744563
GLW-6aP_200,GLW-6aP,"Goad, B.E. & Cerny, P. 1981. Peraluminous pegmatitic granites and their pegmatite aureoles in the Winnipeg River district, southeastern Manitoba. Canadian Mineralogist, 19, 177–194.",Natural s-type granite,-1,-1,-1,-1,-1,-1,-1,-1,-1,76.25,0.04,15.15,0.71,0.05,0.18,2.93,4.69,2,20,47,0.5,Natural,Natural,Natural,Natural,Natural,Nat,1.269116471,0.094445394,0.001252029,0.297151411,0.099638913,0.003239527,0.00050547,0.009888114,0.76,29.15,1.51,11.23889771
TNL-31_201,TNL-31,"Goad, B.E. & Cerny, P. 1981. Peraluminous pegmatitic granites and their pegmatite aureoles in the Winnipeg River district, southeastern Manitoba. Canadian Mineralogist, 19, 177–194.",Natural s-type granite,-1,-1,-1,-1,-1,-1,-1,-1,-1,77.52,0.03,12.35,0.96,0.2,0.42,3.25,5.27,2,20,47,0.5,Natural,Natural,Natural,Natural,Natural,Nat,1.290270069,0.10479596,0.004989232,0.242189162,0.111857871,0.007530392,0.000377673,0.013420157,1.17,13.92,1.08,27.10156233
PG37_202,PG37,"Goad, B.E. & Cerny, P. 1981. Peraluminous pegmatitic granites and their pegmatite aureoles in the Winnipeg River district, southeastern Manitoba. Canadian Mineralogist, 19, 177–194.",Natural s-type granite,-1,-1,-1,-1,-1,-1,-1,-1,-1,78,0.06,11.57,1.35,0.05,0.34,3.67,4.96,2,20,47,0.5,Natural,Natural,Natural,Natural,Natural,Nat,1.298290621,0.118486367,0.001244569,0.226898133,0.105222227,0.006082645,0.000753687,0.018821079,1.4,19.48,0.99,6.202486155
TL006_203,TL006,"Goad, B.E. & Cerny, P. 1981. Peraluminous pegmatitic granites and their pegmatite aureoles in the Winnipeg River district, southeastern Manitoba. Canadian Mineralogist, 19, 177–194.",Natural s-type granite,-1,-1,-1,-1,-1,-1,-1,-1,-1,74.02,0.03,14.5,1.31,0.09,0.36,4.01,5.67,2,20,47,0.5,Natural,Natural,Natural,Natural,Natural,Nat,1.232080753,0.129345309,0.002248909,0.284475205,0.120384132,0.006465415,0.000378304,0.018264421,1.4,20.01,1.11,10.96315749
GLW-6aA_204,GLW-6aA,"Goad, B.E. & Cerny, P. 1981. Peraluminous pegmatitic granites and their pegmatite aureoles in the Winnipeg River district, southeastern Manitoba. Canadian Mineralogist, 19, 177–194.",Natural s-type granite,-1,-1,-1,-1,-1,-1,-1,-1,-1,78.17,0.06,12.9,1.5,0.03,0.4,6.27,0.67,2,20,47,0.5,Natural,Natural,Natural,Natural,Natural,Nat,1.301085912,0.202446574,0.000750763,0.253049165,0.014133744,0.007194594,0.000757746,0.020832209,1.53,28.14,1.13,3.478497784
SR-95_205,SR-95,"Goad, B.E. & Cerny, P. 1981. Peraluminous pegmatitic granites and their pegmatite aureoles in the Winnipeg River district, southeastern Manitoba. Canadian Mineralogist, 19, 177–194.",Natural s-type granite,-1,-1,-1,-1,-1,-1,-1,-1,-1,76.97,0.1,12.21,1.64,0.04,0.32,3.51,5.22,2,20,47,0.5,Natural,Natural,Natural,Natural,Natural,Nat,1.28106977,0.113277398,0.001001119,0.239421809,0.110725539,0.005756258,0.001263037,0.022799478,1.68,19.68,1.04,4.206276759
GL003_206,GL003,"Goad, B.E. & Cerny, P. 1981. Peraluminous pegmatitic granites and their pegmatite aureoles in the Winnipeg River district, southeastern Manitoba. Canadian Mineralogist, 19, 177–194.",Natural s-type granite,-1,-1,-1,-1,-1,-1,-1,-1,-1,76.09,0.04,14.45,1.71,0.03,0.21,5.25,2.21,2,20,47,0.5,Natural,Natural,Natural,Natural,Natural,Nat,1.266451401,0.169555808,0.000752129,0.283439049,0.046983643,0.003784033,0.000506083,0.023823441,1.74,44.81,1.29,3.060473886
PL39_207,PL39,"Holtz, F. & Johannes, W. 1991. Genesis of peraluminous granites I. Experimental investigation of melt compositions at 3 and 5 kb and various H2O activities. Journal of Petrology, 32, 935–958.",Natural s-type granite,-1,-1,-1,-1,-1,-1,-1,-1,-1,74.93,0.16,15.14,1.02,0.2,0.26,3.4,4.88,2,20,47,0.5,Natural,Natural,Natural,Natural,Natural,Nat,1.247163984,0.109800199,0.005055316,0.296954415,0.103606121,0.004723417,0.002040934,0.014162962,1.22,23.25,1.36,26.3047305
PL33_208,PL33,"Holtz, F. & Johannes, W. 1991. Genesis of peraluminous granites I. Experimental investigation of melt compositions at 3 and 5 kb and various H2O activities. Journal of Petrology, 32, 935–958.",Natural s-type granite,-1,-1,-1,-1,-1,-1,-1,-1,-1,74.61,0.26,15.23,1.3,0.22,0.22,3.09,5.08,2,20,47,0.5,Natural,Natural,Natural,Natural,Natural,Nat,1.241894943,0.099612483,0.005379273,0.298709419,0.107845226,0.003866234,0.003231728,0.018102772,1.52,25.76,1.41,22.90802545
PB339_209,PB339,"Holtz, F. & Johannes, W. 1991. Genesis of peraluminous granites I. Experimental investigation of melt compositions at 3 and 5 kb and various H2O activities. Journal of Petrology, 32, 935–958.",Natural s-type granite,-1,-1,-1,-1,-1,-1,-1,-1,-1,74.71,0,15.29,1.5,0.3,0.02,2.6,5.59,2,20,47,0.5,Natural,Natural,Natural,Natural,Natural,Nat,1.243456499,0.083744556,0.007380669,0.300004675,0.118693191,0.000365841,0,0.020812562,1.79,228.91,1.48,26.17887018
PL38_210,PL38,"Holtz, F. & Johannes, W. 1991. Genesis of peraluminous granites I. Experimental investigation of melt compositions at 3 and 5 kb and various H2O activities. Journal of Petrology, 32, 935–958.",Natural s-type granite,-1,-1,-1,-1,-1,-1,-1,-1,-1,73.71,0.3,15.21,1.53,0.3,0.36,2.65,5.95,2,20,47,0.5,Natural,Natural,Natural,Natural,Natural,Nat,1.226928141,0.08550466,0.007332906,0.298263135,0.126363756,0.006360786,0.003700553,0.021316081,1.83,13.44,1.37,25.59569032
PB65_211,PB65,"Holtz, F. & Johannes, W. 1991. Genesis of peraluminous granites I. Experimental investigation of melt compositions at 3 and 5 kb and various H2O activities. Journal of Petrology, 32, 935–958.",Natural s-type granite,-1,-1,-1,-1,-1,-1,-1,-1,-1,73.64,0.32,14.81,1.62,0.41,0.91,3.72,4.58,2,20,47,0.5,Natural,Natural,Natural,Natural,Natural,Nat,1.225674576,0.119938674,0.010189957,0.290422494,0.097225184,0.016295473,0.003985333,0.022504179,2.03,7.36,1.24,31.16753687
PB64_212,PB64,"Holtz, F. & Johannes, W. 1991. Genesis of peraluminous granites I. Experimental investigation of melt compositions at 3 and 5 kb and various H2O activities. Journal of Petrology, 32, 935–958.",Natural s-type granite,-1,-1,-1,-1,-1,-1,-1,-1,-1,72.43,0.33,15.44,1.64,0.56,0.69,3.3,5.61,2,20,47,0.5,Natural,Natural,Natural,Natural,Natural,Nat,1.205632585,0.106484658,0.01394148,0.302805179,0.119083092,0.012388528,0.004093424,0.02277608,2.2,8.6,1.27,37.96951732
PB349_213,PB349,"Holtz, F. & Johannes, W. 1991. Genesis of peraluminous granites I. Experimental investigation of melt compositions at 3 and 5 kb and various H2O activities. Journal of Petrology, 32, 935–958.",Natural s-type granite,-1,-1,-1,-1,-1,-1,-1,-1,-1,76.66,0.08,14.14,0.97,0.03,0.28,3.71,4.12,2,20,47,0.5,Natural,Natural,Natural,Natural,Natural,Nat,1.276015461,0.119717922,0.000760739,0.277461643,0.087448192,0.004920878,0.001023752,0.013568532,1.01,24.33,1.31,5.308983744
PL22_214,PL22,"Holtz, F. & Johannes, W. 1991. Genesis of peraluminous granites I. Experimental investigation of melt compositions at 3 and 5 kb and various H2O activities. Journal of Petrology, 32, 935–958.",Natural s-type granite,-1,-1,-1,-1,-1,-1,-1,-1,-1,74.87,0.14,14.97,1.05,0,0.45,3.59,4.93,2,20,47,0.5,Natural,Natural,Natural,Natural,Natural,Nat,1.24613315,0.115876384,0,0.293593518,0.10469552,0.00802725,0.001793362,0.014607205,1.05,14.44,1.28,0
PB331_215,PB331,"Holtz, F. & Johannes, W. 1991. Genesis of peraluminous granites I. Experimental investigation of melt compositions at 3 and 5 kb and various H2O activities. Journal of Petrology, 32, 935–958.",Natural s-type granite,-1,-1,-1,-1,-1,-1,-1,-1,-1,74.76,0.14,14.6,1.13,0.19,0.41,3.68,5.09,2,20,47,0.5,Natural,Natural,Natural,Natural,Natural,Nat,1.244377514,0.118680406,0.004600923,0.286348541,0.108051549,0.007348473,0.001805889,0.015741463,1.32,16.15,1.22,22.61742183
PL28_216,PL28,"Holtz, F. & Johannes, W. 1991. Genesis of peraluminous granites I. Experimental investigation of melt compositions at 3 and 5 kb and various H2O activities. Journal of Petrology, 32, 935–958.",Natural s-type granite,-1,-1,-1,-1,-1,-1,-1,-1,-1,74.07,0.27,14.85,1.78,0.54,0.49,2.89,5.11,2,20,47,0.5,Natural,Natural,Natural,Natural,Natural,Nat,1.232884793,0.093129798,0.01336312,0.291229158,0.108525438,0.008698369,0.003435471,0.024818721,2.32,10.71,1.38,34.99862751
PL23_217,PL23,"Holtz, F. & Johannes, W. 1991. Genesis of peraluminous granites I. Experimental investigation of melt compositions at 3 and 5 kb and various H2O activities. Journal of Petrology, 32, 935–958.",Natural s-type granite,-1,-1,-1,-1,-1,-1,-1,-1,-1,73.34,0.31,15.23,1.89,0.59,0.64,2.7,5.3,2,20,47,0.5,Natural,Natural,Natural,Natural,Natural,Nat,1.220663008,0.087210373,0.014676144,0.298673296,0.112594935,0.01145748,0.003830855,0.026312611,2.48,7.61,1.41,35.80529251
PH101_218,PH101,"Holtz, F. & Johannes, W. 1991. Genesis of peraluminous granites I. Experimental investigation of melt compositions at 3 and 5 kb and various H2O activities. Journal of Petrology, 32, 935–958.",Natural s-type granite,-1,-1,-1,-1,-1,-1,-1,-1,-1,74.1,0.28,14.78,1.36,0.19,0.31,2.91,6.08,2,20,47,0.5,Natural,Natural,Natural,Natural,Natural,Nat,1.233420232,0.093904578,0.004830407,0.289833115,0.129007916,0.005481709,0.003464052,0.018865148,1.55,17.13,1.27,20.38528694
PH338_219,PH338,"Holtz, F. & Johannes, W. 1991. Genesis of peraluminous granites I. Experimental investigation of melt compositions at 3 and 5 kb and various H2O activities. Journal of Petrology, 32, 935–958.",Natural s-type granite,-1,-1,-1,-1,-1,-1,-1,-1,-1,72.71,0.45,14.04,3.35,1.04,1.37,3.32,3.72,2,20,47,0.5,Natural,Natural,Natural,Natural,Natural,Nat,1.210211788,0.107159574,0.025684377,0.275436096,0.078992496,0.024491594,0.00564665,0.046597976,4.38,4.38,1.31,35.53339886
PH 102_220,PH 102,"Holtz, F. & Johannes, W. 1991. Genesis of peraluminous granites I. Experimental investigation of melt compositions at 3 and 5 kb and various H2O activities. Journal of Petrology, 32, 935–958.",Natural s-type granite,-1,-1,-1,-1,-1,-1,-1,-1,-1,66.96,0.77,16.33,4.98,2.04,1.81,3.71,3.41,2,20,47,0.5,Natural,Natural,Natural,Natural,Natural,Nat,1.114521875,0.119560571,0.050701453,0.320268575,0.072310391,0.032207563,0.009691857,0.069283972,7.02,3.71,1.43,42.25634328
KG215_221,KG215,"Inger, S. & Harris, N. 1993. Geochemical constraints on leucogranite magmatism in the Langtang Valley, Nepal Himalaya. Journal of Petrology, 34, 345–368.",Natural s-type granite,-1,-1,-1,-1,-1,-1,-1,-1,-1,74.11,0.05,15.46,0.63,0.29,0.8,3.57,5.1,2,20,47,0.5,Natural,Natural,Natural,Natural,Natural,Nat,1.233486107,0.115070876,0.007268594,0.303177148,0.108311691,0.014231284,0.000632431,0.00873,0.92,8.09,1.28,45.43270308
SKG15_222,SKG15,"Inger, S. & Harris, N. 1993. Geochemical constraints on leucogranite magmatism in the Langtang Valley, Nepal Himalaya. Journal of Petrology, 34, 345–368.",Natural s-type granite,-1,-1,-1,-1,-1,-1,-1,-1,-1,73.19,0.11,14.61,0.79,0.35,0.99,3.16,6.8,2,20,47,0.5,Natural,Natural,Natural,Natural,Natural,Nat,1.218257118,0.102027189,0.008659759,0.286539449,0.144283422,0.01757368,0.001413872,0.01105702,1.14,5.81,1.09,43.92075814
KG211_223,KG211,"Inger, S. & Harris, N. 1993. Geochemical constraints on leucogranite magmatism in the Langtang Valley, Nepal Himalaya. Journal of Petrology, 34, 345–368.",Natural s-type granite,-1,-1,-1,-1,-1,-1,-1,-1,-1,74.12,0.08,14.94,0.96,0.31,0.65,3.73,5.2,2,20,47,0.5,Natural,Natural,Natural,Natural,Natural,Nat,1.233691131,0.120396217,0.007693561,0.293135843,0.110433439,0.011594276,0.00100195,0.013404859,1.27,10.38,1.21,36.46510461
SKG12_224,SKG12,"Inger, S. & Harris, N. 1993. Geochemical constraints on leucogranite magmatism in the Langtang Valley, Nepal Himalaya. Journal of Petrology, 34, 345–368.",Natural s-type granite,-1,-1,-1,-1,-1,-1,-1,-1,-1,74.8,0.12,14.82,0.95,0.39,0.86,3.33,4.73,2,20,47,0.5,Natural,Natural,Natural,Natural,Natural,Nat,1.245088182,0.107326197,0.009578395,0.290671587,0.100458711,0.015357198,0.001487305,0.013265533,1.34,6.99,1.3,41.92972088
KG208_225,KG208,"Inger, S. & Harris, N. 1993. Geochemical constraints on leucogranite magmatism in the Langtang Valley, Nepal Himalaya. Journal of Petrology, 34, 345–368.",Natural s-type granite,-1,-1,-1,-1,-1,-1,-1,-1,-1,75.33,0.15,15.05,1.18,0.37,0.77,3.26,3.87,2,20,47,0.5,Natural,Natural,Natural,Natural,Natural,Nat,1.253909468,0.105328561,0.0092199,0.2953104,0.08209501,0.013790493,0.00188628,0.016478154,1.56,7.64,1.47,35.87781413
KG210_226,KG210,"Inger, S. & Harris, N. 1993. Geochemical constraints on leucogranite magmatism in the Langtang Valley, Nepal Himalaya. Journal of Petrology, 34, 345–368.",Natural s-type granite,-1,-1,-1,-1,-1,-1,-1,-1,-1,74.22,0.01,14.97,1.81,0.23,0.89,3.43,4.44,2,20,47,0.5,Natural,Natural,Natural,Natural,Natural,Nat,1.235340085,0.110527583,0.005782871,0.293595089,0.094236973,0.015902409,0.000126884,0.025256985,2.05,6.95,1.33,18.63046945
KG214_227,KG214,"Inger, S. & Harris, N. 1993. Geochemical constraints on leucogranite magmatism in the Langtang Valley, Nepal Himalaya. Journal of Petrology, 34, 345–368.",Natural s-type granite,-1,-1,-1,-1,-1,-1,-1,-1,-1,72.91,0.18,15.68,1.43,0.54,1.04,3.74,4.47,2,20,47,0.5,Natural,Natural,Natural,Natural,Natural,Nat,1.213595716,0.120814699,0.013376545,0.307665651,0.094964167,0.018516041,0.002250159,0.019882001,1.97,6.52,1.31,40.21987313
SKG9_228,SKG9,"Inger, S. & Harris, N. 1993. Geochemical constraints on leucogranite magmatism in the Langtang Valley, Nepal Himalaya. Journal of Petrology, 34, 345–368.",Natural s-type granite,-1,-1,-1,-1,-1,-1,-1,-1,-1,73.11,0.28,15.69,2.07,0.72,1.85,4.57,1.7,2,20,47,0.5,Natural,Natural,Natural,Natural,Natural,Nat,1.216906073,0.147352201,0.017810878,0.30782947,0.03619766,0.033069709,0.003495436,0.028845468,2.79,4.46,1.42,38.17461004
Nab-2A_229,Nab-2A,"Nabelek, P.I., Russ-Nabelek, C. & Haeussler, G.T. 1992. Stable isotope evidence for the petrogenesis and fluid evolution in the Proterozoic Harney Peak leucogranite, Black Hills, South Dakota. Geochimica et Cosmochimica Acta, 56, 403–417, https://doi.org/10.1016/0016-7037(92)90141-5.",Natural s-type granite,-1,-1,-1,-1,-1,-1,-1,-1,-1,75.21,0,14.78,0.16,0.02,0.21,4.61,5,2,20,47,0.5,Natural,Natural,Natural,Natural,Natural,Nat,1.251897864,0.148650627,0.000505731,0.289874913,0.106243665,0.003816576,0,0.002269718,0.18,38.95,1.12,18.2216054
Nab9_230,Nab9,"Nabelek, P.I., Russ-Nabelek, C. & Haeussler, G.T. 1992. Stable isotope evidence for the petrogenesis and fluid evolution in the Proterozoic Harney Peak leucogranite, Black Hills, South Dakota. Geochimica et Cosmochimica Acta, 56, 403–417, https://doi.org/10.1016/0016-7037(92)90141-5.",Natural s-type granite,-1,-1,-1,-1,-1,-1,-1,-1,-1,76.56,0.01,15.45,0.14,0.04,1.63,5.58,0.59,2,20,47,0.5,Natural,Natural,Natural,Natural,Natural,Nat,1.274226205,0.180110767,0.001008995,0.30312743,0.012519546,0.02900772,0.000127297,0.001981158,0.18,6.21,1.37,33.74393052
Nab7_231,Nab7,"Nabelek, P.I., Russ-Nabelek, C. & Haeussler, G.T. 1992. Stable isotope evidence for the petrogenesis and fluid evolution in the Proterozoic Harney Peak leucogranite, Black Hills, South Dakota. Geochimica et Cosmochimica Acta, 56, 403–417, https://doi.org/10.1016/0016-7037(92)90141-5.",Natural s-type granite,-1,-1,-1,-1,-1,-1,-1,-1,-1,76.68,0.01,15.15,0.22,0.03,1.37,6.09,0.44,2,20,47,0.5,Natural,Natural,Natural,Natural,Natural,Nat,1.27630768,0.196574253,0.000756977,0.297235309,0.009284564,0.024482731,0.000127336,0.003114197,0.25,8.03,1.29,19.55419782
Nab-46A_232,Nab-46A,"Nabelek, P.I., Russ-Nabelek, C. & Haeussler, G.T. 1992. Stable isotope evidence for the petrogenesis and fluid evolution in the Proterozoic Harney Peak leucogranite, Black Hills, South Dakota. Geochimica et Cosmochimica Acta, 56, 403–417, https://doi.org/10.1016/0016-7037(92)90141-5.",Natural s-type granite,-1,-1,-1,-1,-1,-1,-1,-1,-1,78.44,0.01,14.67,0.24,0.05,0.26,5.39,0.94,2,20,47,0.5,Natural,Natural,Natural,Natural,Natural,Nat,1.305515433,0.173885245,0.001263685,0.287729155,0.019897024,0.004722878,0.000127544,0.003402843,0.3,36.82,1.45,27.07976386
Nab-20A_233,Nab-20A,"Nabelek, P.I., Russ-Nabelek, C. & Haeussler, G.T. 1992. Stable isotope evidence for the petrogenesis and fluid evolution in the Proterozoic Harney Peak leucogranite, Black Hills, South Dakota. Geochimica et Cosmochimica Acta, 56, 403–417, https://doi.org/10.1016/0016-7037(92)90141-5.",Natural s-type granite,-1,-1,-1,-1,-1,-1,-1,-1,-1,75.39,0.03,15.26,0.21,0.07,0.77,4.13,4.13,2,20,47,0.5,Natural,Natural,Natural,Natural,Natural,Nat,1.254812825,0.133291529,0.001766999,0.299351951,0.087699232,0.01378848,0.000382164,0.002973853,0.28,9.67,1.28,37.2717595
Nab-3_234,Nab-3,"Nabelek, P.I., Russ-Nabelek, C. & Haeussler, G.T. 1992. Stable isotope evidence for the petrogenesis and fluid evolution in the Proterozoic Harney Peak leucogranite, Black Hills, South Dakota. Geochimica et Cosmochimica Acta, 56, 403–417, https://doi.org/10.1016/0016-7037(92)90141-5.",Natural s-type granite,-1,-1,-1,-1,-1,-1,-1,-1,-1,75.29,0,15.49,0.38,0.04,0.29,5.44,3.08,2,20,47,0.5,Natural,Natural,Natural,Natural,Natural,Nat,1.253211035,0.175564541,0.001011154,0.303775996,0.065327454,0.005087212,0,0.005247119,0.42,34.51,1.23,16.15707472
Nab3A_235,Nab3A,"Nabelek, P.I., Russ-Nabelek, C. & Haeussler, G.T. 1992. Stable isotope evidence for the petrogenesis and fluid evolution in the Proterozoic Harney Peak leucogranite, Black Hills, South Dakota. Geochimica et Cosmochimica Acta, 56, 403–417, https://doi.org/10.1016/0016-7037(92)90141-5.",Natural s-type granite,-1,-1,-1,-1,-1,-1,-1,-1,-1,75.56,0.02,15.44,0.38,0.08,0.56,4.31,3.66,2,20,47,0.5,Natural,Natural,Natural,Natural,Natural,Nat,1.257717721,0.138960663,0.00201594,0.302819561,0.077628601,0.009961276,0.000254336,0.005230599,0.46,13.95,1.34,27.81935541
Nab6C_236,Nab6C,"Nabelek, P.I., Russ-Nabelek, C. & Haeussler, G.T. 1992. Stable isotope evidence for the petrogenesis and fluid evolution in the Proterozoic Harney Peak leucogranite, Black Hills, South Dakota. Geochimica et Cosmochimica Acta, 56, 403–417, https://doi.org/10.1016/0016-7037(92)90141-5.",Natural s-type granite,-1,-1,-1,-1,-1,-1,-1,-1,-1,75.87,0.03,15.46,0.41,0.07,0.82,4.13,3.2,2,20,47,0.5,Natural,Natural,Natural,Natural,Natural,Nat,1.262894389,0.133250858,0.00176646,0.303250752,0.068021746,0.014691133,0.000382048,0.005662753,0.48,9.07,1.4,23.77721169
Nab-7B_237,Nab-7B,"Nabelek, P.I., Russ-Nabelek, C. & Haeussler, G.T. 1992. Stable isotope evidence for the petrogenesis and fluid evolution in the Proterozoic Harney Peak leucogranite, Black Hills, South Dakota. Geochimica et Cosmochimica Acta, 56, 403–417, https://doi.org/10.1016/0016-7037(92)90141-5.",Natural s-type granite,-1,-1,-1,-1,-1,-1,-1,-1,-1,74.58,0.06,14.75,0.45,0.08,0.48,2.94,6.66,2,20,47,0.5,Natural,Natural,Natural,Natural,Natural,Nat,1.241265588,0.094879931,0.002019427,0.289373553,0.141485215,0.008527086,0.000764328,0.006230929,0.53,11.13,1.18,24.47684675
Nab-23A_238,Nab-23A,"Nabelek, P.I., Russ-Nabelek, C. & Haeussler, G.T. 1992. Stable isotope evidence for the petrogenesis and fluid evolution in the Proterozoic Harney Peak leucogranite, Black Hills, South Dakota. Geochimica et Cosmochimica Acta, 56, 403–417, https://doi.org/10.1016/0016-7037(92)90141-5.",Natural s-type granite,-1,-1,-1,-1,-1,-1,-1,-1,-1,74.37,0.03,15.48,0.47,0.1,0.63,2.89,6.02,2,20,47,0.5,Natural,Natural,Natural,Natural,Natural,Nat,1.237822539,0.093361891,0.002527627,0.303745049,0.127829775,0.011263394,0.00038267,0.006522781,0.57,8.29,1.31,27.92832213
Nab3C_239,Nab3C,"Nabelek, P.I., Russ-Nabelek, C. & Haeussler, G.T. 1992. Stable isotope evidence for the petrogenesis and fluid evolution in the Proterozoic Harney Peak leucogranite, Black Hills, South Dakota. Geochimica et Cosmochimica Acta, 56, 403–417, https://doi.org/10.1016/0016-7037(92)90141-5.",Natural s-type granite,-1,-1,-1,-1,-1,-1,-1,-1,-1,75.68,0.02,14.95,0.53,0.08,0.68,5.46,2.59,2,20,47,0.5,Natural,Natural,Natural,Natural,Natural,Nat,1.259636729,0.176263521,0.002019016,0.29330523,0.055070824,0.012153161,0.000254724,0.007362328,0.61,14.5,1.2,21.52161058
Nab-22_240,Nab-22,"Nabelek, P.I., Russ-Nabelek, C. & Haeussler, G.T. 1992. Stable isotope evidence for the petrogenesis and fluid evolution in the Proterozoic Harney Peak leucogranite, Black Hills, South Dakota. Geochimica et Cosmochimica Acta, 56, 403–417, https://doi.org/10.1016/0016-7037(92)90141-5.",Natural s-type granite,-1,-1,-1,-1,-1,-1,-1,-1,-1,76.45,0.05,13.83,0.53,0.09,0.5,3.1,5.45,2,20,47,0.5,Natural,Natural,Natural,Natural,Natural,Nat,1.272534005,0.100061537,0.002270239,0.271219279,0.11569787,0.008883614,0.000636487,0.007358585,0.62,11.26,1.21,23.57752891
Nab4A_241,Nab4A,"Nabelek, P.I., Russ-Nabelek, C. & Haeussler, G.T. 1992. Stable isotope evidence for the petrogenesis and fluid evolution in the Proterozoic Harney Peak leucogranite, Black Hills, South Dakota. Geochimica et Cosmochimica Acta, 56, 403–417, https://doi.org/10.1016/0016-7037(92)90141-5.",Natural s-type granite,-1,-1,-1,-1,-1,-1,-1,-1,-1,74.14,0.01,15.86,0.61,0.06,0.98,6.09,2.25,2,20,47,0.5,Natural,Natural,Natural,Natural,Natural,Nat,1.233989787,0.196574253,0.001513954,0.311199384,0.04771834,0.017409942,0.000127336,0.008493266,0.67,11.29,1.19,15.1286198
Nab0D_242,Nab0D,"Nabelek, P.I., Russ-Nabelek, C. & Haeussler, G.T. 1992. Stable isotope evidence for the petrogenesis and fluid evolution in the Proterozoic Harney Peak leucogranite, Black Hills, South Dakota. Geochimica et Cosmochimica Acta, 56, 403–417, https://doi.org/10.1016/0016-7037(92)90141-5.",Natural s-type granite,-1,-1,-1,-1,-1,-1,-1,-1,-1,73.77,0.02,15.36,0.56,0.1,0.24,2.84,7.1,2,20,47,0.5,Natural,Natural,Natural,Natural,Natural,Nat,1.227843272,0.091606208,0.002524541,0.301378293,0.150788898,0.0043547,0.000254802,0.007789454,0.66,21.04,1.22,24.47684675
Nab-38A_243,Nab-38A,"Nabelek, P.I., Russ-Nabelek, C. & Haeussler, G.T. 1992. Stable isotope evidence for the petrogenesis and fluid evolution in the Proterozoic Harney Peak leucogranite, Black Hills, South Dakota. Geochimica et Cosmochimica Acta, 56, 403–417, https://doi.org/10.1016/0016-7037(92)90141-5.",Natural s-type granite,-1,-1,-1,-1,-1,-1,-1,-1,-1,75.1,0.01,14.13,0.58,0.09,0.27,3.33,6.48,2,20,47,0.5,Natural,Natural,Natural,Natural,Natural,Nat,1.250027064,0.107563419,0.002269316,0.277089373,0.13765902,0.004893063,0.000127246,0.008062862,0.67,21.98,1.11,21.96357624
Nab-34A_244,Nab-34A,"Nabelek, P.I., Russ-Nabelek, C. & Haeussler, G.T. 1992. Stable isotope evidence for the petrogenesis and fluid evolution in the Proterozoic Harney Peak leucogranite, Black Hills, South Dakota. Geochimica et Cosmochimica Acta, 56, 403–417, https://doi.org/10.1016/0016-7037(92)90141-5.",Natural s-type granite,-1,-1,-1,-1,-1,-1,-1,-1,-1,73.46,0.02,15.84,0.6,0.09,0.41,3.71,5.87,2,20,47,0.5,Natural,Natural,Natural,Natural,Natural,Nat,1.222658033,0.119673644,0.002281372,0.310626073,0.124724846,0.007287493,0.000255843,0.008390108,0.69,16.42,1.23,21.37821503
Nab-24B_245,Nab-24B,"Nabelek, P.I., Russ-Nabelek, C. & Haeussler, G.T. 1992. Stable isotope evidence for the petrogenesis and fluid evolution in the Proterozoic Harney Peak leucogranite, Black Hills, South Dakota. Geochimica et Cosmochimica Acta, 56, 403–417, https://doi.org/10.1016/0016-7037(92)90141-5.",Natural s-type granite,-1,-1,-1,-1,-1,-1,-1,-1,-1,74.39,0.05,15.37,0.53,0.13,0.68,3.05,5.8,2,20,47,0.5,Natural,Natural,Natural,Natural,Natural,Nat,1.238130713,0.098511323,0.003282237,0.301408961,0.123149596,0.012158107,0.00063707,0.007365324,0.66,8.1,1.29,30.82618501
Nab-44A_246,Nab-44A,"Nabelek, P.I., Russ-Nabelek, C. & Haeussler, G.T. 1992. Stable isotope evidence for the petrogenesis and fluid evolution in the Proterozoic Harney Peak leucogranite, Black Hills, South Dakota. Geochimica et Cosmochimica Acta, 56, 403–417, https://doi.org/10.1016/0016-7037(92)90141-5.",Natural s-type granite,-1,-1,-1,-1,-1,-1,-1,-1,-1,73.87,0.04,15.14,0.63,0.09,0.86,3.73,5.64,2,20,47,0.5,Natural,Natural,Natural,Natural,Natural,Nat,1.229479031,0.120328514,0.002268855,0.296963502,0.119726067,0.015400957,0.000508879,0.008768349,0.72,7.81,1.16,20.55642707
Nab-CP12A_247,Nab-CP12A,"Nabelek, P.I., Russ-Nabelek, C. & Haeussler, G.T. 1992. Stable isotope evidence for the petrogenesis and fluid evolution in the Proterozoic Harney Peak leucogranite, Black Hills, South Dakota. Geochimica et Cosmochimica Acta, 56, 403–417, https://doi.org/10.1016/0016-7037(92)90141-5.",Natural s-type granite,-1,-1,-1,-1,-1,-1,-1,-1,-1,73.85,0.02,16.16,0.52,0.17,0.5,5.54,3.24,2,20,47,0.5,Natural,Natural,Natural,Natural,Natural,Nat,1.229249396,0.178656557,0.004261368,0.317082813,0.068855189,0.008827968,0.000253,0.007171867,0.69,20.24,1.24,37.2717595
Nab-CP5B_248,Nab-CP5B,"Nabelek, P.I., Russ-Nabelek, C. & Haeussler, G.T. 1992. Stable isotope evidence for the petrogenesis and fluid evolution in the Proterozoic Harney Peak leucogranite, Black Hills, South Dakota. Geochimica et Cosmochimica Acta, 56, 403–417, https://doi.org/10.1016/0016-7037(92)90141-5.",Natural s-type granite,-1,-1,-1,-1,-1,-1,-1,-1,-1,76.5,0.01,15.04,0.74,0.07,0.62,6.5,0.52,2,20,47,0.5,Natural,Natural,Natural,Natural,Natural,Nat,1.273320019,0.209815873,0.001764486,0.294940491,0.011000737,0.011051328,0.000127207,0.010322975,0.81,18.99,1.27,14.59765283
Nab8A_249,Nab8A,"Nabelek, P.I., Russ-Nabelek, C. & Haeussler, G.T. 1992. Stable isotope evidence for the petrogenesis and fluid evolution in the Proterozoic Harney Peak leucogranite, Black Hills, South Dakota. Geochimica et Cosmochimica Acta, 56, 403–417, https://doi.org/10.1016/0016-7037(92)90141-5.",Natural s-type granite,-1,-1,-1,-1,-1,-1,-1,-1,-1,74.33,0.03,15.8,0.69,0.12,1.03,3.88,4.11,2,20,47,0.5,Natural,Natural,Natural,Natural,Natural,Nat,1.237135152,0.125351741,0.003035626,0.309992659,0.087237595,0.018363398,0.000382982,0.009650236,0.82,6.83,1.34,23.9292076
Nab-45B_250,Nab-45B,"Nabelek, P.I., Russ-Nabelek, C. & Haeussler, G.T. 1992. Stable isotope evidence for the petrogenesis and fluid evolution in the Proterozoic Harney Peak leucogranite, Black Hills, South Dakota. Geochimica et Cosmochimica Acta, 56, 403–417, https://doi.org/10.1016/0016-7037(92)90141-5.",Natural s-type granite,-1,-1,-1,-1,-1,-1,-1,-1,-1,75.67,0.01,15.7,0.74,0.11,0.5,4.82,2.44,2,20,47,0.5,Natural,Natural,Natural,Natural,Natural,Nat,1.259453369,0.155652143,0.002783225,0.308055524,0.051746991,0.008910792,0.000127687,0.010361926,0.86,17.47,1.42,21.17301806
Nab-31A_251,Nab-31A,"Nabelek, P.I., Russ-Nabelek, C. & Haeussler, G.T. 1992. Stable isotope evidence for the petrogenesis and fluid evolution in the Proterozoic Harney Peak leucogranite, Black Hills, South Dakota. Geochimica et Cosmochimica Acta, 56, 403–417, https://doi.org/10.1016/0016-7037(92)90141-5.",Natural s-type granite,-1,-1,-1,-1,-1,-1,-1,-1,-1,74.98,0.06,15.46,0.76,0.12,0.91,4.79,2.91,2,20,47,0.5,Natural,Natural,Natural,Natural,Natural,Nat,1.248039207,0.154631306,0.003029141,0.30334331,0.061778277,0.016147036,0.000764328,0.010620903,0.89,9.58,1.3,22.19143682
Nab-26_252,Nab-26,"Nabelek, P.I., Russ-Nabelek, C. & Haeussler, G.T. 1992. Stable isotope evidence for the petrogenesis and fluid evolution in the Proterozoic Harney Peak leucogranite, Black Hills, South Dakota. Geochimica et Cosmochimica Acta, 56, 403–417, https://doi.org/10.1016/0016-7037(92)90141-5.",Natural s-type granite,-1,-1,-1,-1,-1,-1,-1,-1,-1,73.66,0.09,15.18,0.67,0.17,0.57,2.92,6.73,2,20,47,0.5,Natural,Natural,Natural,Natural,Natural,Nat,1.225953008,0.094348109,0.004296966,0.29775008,0.142970357,0.010173388,0.001148011,0.009358772,0.85,9.27,1.2,31.46637597
Nab-6B_253,Nab-6B,"Nabelek, P.I., Russ-Nabelek, C. & Haeussler, G.T. 1992. Stable isotope evidence for the petrogenesis and fluid evolution in the Proterozoic Harney Peak leucogranite, Black Hills, South Dakota. Geochimica et Cosmochimica Acta, 56, 403–417, https://doi.org/10.1016/0016-7037(92)90141-5.",Natural s-type granite,-1,-1,-1,-1,-1,-1,-1,-1,-1,74.65,0.09,14.54,0.69,0.17,0.53,2.64,6.67,2,20,47,0.5,Natural,Natural,Natural,Natural,Natural,Nat,1.242579734,0.085333062,0.004289973,0.285295116,0.141657986,0.009431344,0.001146143,0.00962668,0.86,9.05,1.21,30.82618501
Nab0B_254,Nab0B,"Nabelek, P.I., Russ-Nabelek, C. & Haeussler, G.T. 1992. Stable isotope evidence for the petrogenesis and fluid evolution in the Proterozoic Harney Peak leucogranite, Black Hills, South Dakota. Geochimica et Cosmochimica Acta, 56, 403–417, https://doi.org/10.1016/0016-7037(92)90141-5.",Natural s-type granite,-1,-1,-1,-1,-1,-1,-1,-1,-1,76,0.02,15.28,0.84,0.1,0.49,4.21,3.07,2,20,47,0.5,Natural,Natural,Natural,Natural,Natural,Nat,1.264952896,0.135769229,0.002527627,0.299748403,0.065104505,0.008720047,0.000255114,0.011627566,0.94,15.57,1.43,17.85653569
Nab-25_255,Nab-25,"Nabelek, P.I., Russ-Nabelek, C. & Haeussler, G.T. 1992. Stable isotope evidence for the petrogenesis and fluid evolution in the Proterozoic Harney Peak leucogranite, Black Hills, South Dakota. Geochimica et Cosmochimica Acta, 56, 403–417, https://doi.org/10.1016/0016-7037(92)90141-5.",Natural s-type granite,-1,-1,-1,-1,-1,-1,-1,-1,-1,76.1,0.06,14.14,0.79,0.13,0.76,3.06,4.94,2,20,47,0.5,Natural,Natural,Natural,Natural,Natural,Nat,1.266666658,0.098819582,0.003281569,0.277399475,0.104979869,0.013607052,0.000764328,0.011045739,0.93,7.26,1.28,22.90429699
Nab-27B_256,Nab-27B,"Nabelek, P.I., Russ-Nabelek, C. & Haeussler, G.T. 1992. Stable isotope evidence for the petrogenesis and fluid evolution in the Proterozoic Harney Peak leucogranite, Black Hills, South Dakota. Geochimica et Cosmochimica Acta, 56, 403–417, https://doi.org/10.1016/0016-7037(92)90141-5.",Natural s-type granite,-1,-1,-1,-1,-1,-1,-1,-1,-1,74.04,0.08,14.56,0.73,0.19,0.57,2.92,6.89,2,20,47,0.5,Natural,Natural,Natural,Natural,Natural,Nat,1.232358959,0.094319282,0.004801024,0.285672836,0.146386323,0.01017028,0.001020142,0.01020645,0.93,9.27,1.14,31.99088586
Nab-39A_257,Nab-39A,"Nabelek, P.I., Russ-Nabelek, C. & Haeussler, G.T. 1992. Stable isotope evidence for the petrogenesis and fluid evolution in the Proterozoic Harney Peak leucogranite, Black Hills, South Dakota. Geochimica et Cosmochimica Acta, 56, 403–417, https://doi.org/10.1016/0016-7037(92)90141-5.",Natural s-type granite,-1,-1,-1,-1,-1,-1,-1,-1,-1,73.64,0.01,16.62,1,0.13,0.41,7.14,1.05,2,20,47,0.5,Natural,Natural,Natural,Natural,Natural,Nat,1.225630826,0.230375501,0.003289602,0.326092023,0.022303279,0.007274858,0.0001277,0.013911949,1.13,31.67,1.25,19.12386642
Nab-35A_258,Nab-35A,"Nabelek, P.I., Russ-Nabelek, C. & Haeussler, G.T. 1992. Stable isotope evidence for the petrogenesis and fluid evolution in the Proterozoic Harney Peak leucogranite, Black Hills, South Dakota. Geochimica et Cosmochimica Acta, 56, 403–417, https://doi.org/10.1016/0016-7037(92)90141-5.",Natural s-type granite,-1,-1,-1,-1,-1,-1,-1,-1,-1,72.93,0.02,15.58,0.99,0.23,0.56,3.56,6.12,2,20,47,0.5,Natural,Natural,Natural,Natural,Natural,Nat,1.213836159,0.115035231,0.005812358,0.305681089,0.129966235,0.009989685,0.000255062,0.013751757,1.22,11.52,1.2,29.70928051
Nab-49A_259,Nab-49A,"Nabelek, P.I., Russ-Nabelek, C. & Haeussler, G.T. 1992. Stable isotope evidence for the petrogenesis and fluid evolution in the Proterozoic Harney Peak leucogranite, Black Hills, South Dakota. Geochimica et Cosmochimica Acta, 56, 403–417, https://doi.org/10.1016/0016-7037(92)90141-5.",Natural s-type granite,-1,-1,-1,-1,-1,-1,-1,-1,-1,73.9,0.02,16.43,1.34,0.15,0.58,7.46,0.11,2,20,47,0.5,Natural,Natural,Natural,Natural,Natural,Nat,1.230029519,0.240774295,0.003798794,0.322353906,0.002383849,0.010375138,0.000255608,0.01861177,1.49,23.21,1.27,16.9509057
Nab-32_260,Nab-32,"Nabelek, P.I., Russ-Nabelek, C. & Haeussler, G.T. 1992. Stable isotope evidence for the petrogenesis and fluid evolution in the Proterozoic Harney Peak leucogranite, Black Hills, South Dakota. Geochimica et Cosmochimica Acta, 56, 403–417, https://doi.org/10.1016/0016-7037(92)90141-5.",Natural s-type granite,-1,-1,-1,-1,-1,-1,-1,-1,-1,74.48,0.14,14.43,1.22,0.23,0.93,3.63,4.94,2,20,47,0.5,Natural,Natural,Natural,Natural,Natural,Nat,1.239626038,0.117049808,0.005798184,0.283012197,0.104841204,0.016669271,0.001781077,0.016970998,1.45,7.02,1.19,25.46505284
Nab-43A_261,Nab-43A,"Nabelek, P.I., Russ-Nabelek, C. & Haeussler, G.T. 1992. Stable isotope evidence for the petrogenesis and fluid evolution in the Proterozoic Harney Peak leucogranite, Black Hills, South Dakota. Geochimica et Cosmochimica Acta, 56, 403–417, https://doi.org/10.1016/0016-7037(92)90141-5.",Natural s-type granite,-1,-1,-1,-1,-1,-1,-1,-1,-1,73.97,0.02,15.28,1.61,0.13,0.92,4,4.07,2,20,47,0.5,Natural,Natural,Natural,Natural,Natural,Nat,1.231165374,0.129207611,0.00328625,0.299778943,0.086310113,0.016351754,0.00025514,0.022406616,1.74,7.9,1.29,12.79051499
Nab-30A_262,Nab-30A,"Nabelek, P.I., Russ-Nabelek, C. & Haeussler, G.T. 1992. Stable isotope evidence for the petrogenesis and fluid evolution in the Proterozoic Harney Peak leucogranite, Black Hills, South Dakota. Geochimica et Cosmochimica Acta, 56, 403–417, https://doi.org/10.1016/0016-7037(92)90141-5.",Natural s-type granite,-1,-1,-1,-1,-1,-1,-1,-1,-1,70.99,0.16,16.07,1.48,0.38,0.76,3.79,6.37,2,20,47,0.5,Natural,Natural,Natural,Natural,Natural,Nat,1.181515598,0.122407674,0.009336051,0.315189119,0.135165977,0.013601517,0.00203738,0.020666946,1.86,9,1.16,31.11706148
Nab-21C_263,Nab-21C,"Nabelek, P.I., Russ-Nabelek, C. & Haeussler, G.T. 1992. Stable isotope evidence for the petrogenesis and fluid evolution in the Proterozoic Harney Peak leucogranite, Black Hills, South Dakota. Geochimica et Cosmochimica Acta, 56, 403–417, https://doi.org/10.1016/0016-7037(92)90141-5.",Natural s-type granite,-1,-1,-1,-1,-1,-1,-1,-1,-1,76.46,0.16,13.74,1.55,0.42,0.77,2.86,4.03,2,20,47,0.5,Natural,Natural,Natural,Natural,Natural,Nat,1.272653227,0.092319244,0.01035694,0.269608765,0.085600115,0.013798307,0.002039662,0.02154037,1.96,6.69,1.41,32.46963516
Nab-CPl_264,Nab-CPl,"Nabelek, P.I., Russ-Nabelek, C. & Haeussler, G.T. 1992. Stable isotope evidence for the petrogenesis and fluid evolution in the Proterozoic Harney Peak leucogranite, Black Hills, South Dakota. Geochimica et Cosmochimica Acta, 56, 403–417, https://doi.org/10.1016/0016-7037(92)90141-5.",Natural s-type granite,-1,-1,-1,-1,-1,-1,-1,-1,-1,74.37,0.04,16.21,1.67,0.46,0.78,5.64,0.82,2,20,47,0.5,Natural,Natural,Natural,Natural,Natural,Nat,1.23791995,0.182067748,0.011453666,0.317937486,0.017424229,0.013903054,0.000513786,0.023274565,2.13,13.1,1.49,32.98085124
GL80_265,GL80,"Scaillet, B., France-Lanord, C. & Le Fort, P. 1990. Badrinath-Gangotri plutons (Garhwal, India): petrological and geochemical evidence for fractionation processes in a high Himalayan leucogranite. Journal of Volcanology and Geothermal Research, 44, 163–188, https://doi.org/10.1016/0377-0273(90)90017-A.",Natural s-type granite,-1,-1,-1,-1,-1,-1,-1,-1,-1,75.51,0.02,14.79,0.37,0.05,0.43,5.05,3.79,2,20,47,0.5,Natural,Natural,Natural,Natural,Natural,Nat,1.256752274,0.162828509,0.001267171,0.290125817,0.080458262,0.007650311,0.000255791,0.005117265,0.42,21.28,1.16,19.84781149
GB22_266,GB22,"Scaillet, B., France-Lanord, C. & Le Fort, P. 1990. Badrinath-Gangotri plutons (Garhwal, India): petrological and geochemical evidence for fractionation processes in a high Himalayan leucogranite. Journal of Volcanology and Geothermal Research, 44, 163–188, https://doi.org/10.1016/0377-0273(90)90017-A.",Natural s-type granite,-1,-1,-1,-1,-1,-1,-1,-1,-1,72.88,0.05,16.53,0.51,0.07,0.46,5,4.49,2,20,47,0.5,Natural,Natural,Natural,Natural,Natural,Nat,1.212997991,0.161437177,0.00176603,0.324319686,0.095423197,0.008159757,0.000636591,0.007131829,0.58,19.78,1.22,19.84781149
GL7_267,GL7,"Scaillet, B., France-Lanord, C. & Le Fort, P. 1990. Badrinath-Gangotri plutons (Garhwal, India): petrological and geochemical evidence for fractionation processes in a high Himalayan leucogranite. Journal of Volcanology and Geothermal Research, 44, 163–188, https://doi.org/10.1016/0377-0273(90)90017-A.",Natural s-type granite,-1,-1,-1,-1,-1,-1,-1,-1,-1,74.19,0.05,15.62,0.7,0.07,0.41,4.77,4.18,2,20,47,0.5,Natural,Natural,Natural,Natural,Natural,Nat,1.23486044,0.154032119,0.001763897,0.306396702,0.088839047,0.007244355,0.000635822,0.009794418,0.77,21.26,1.23,15.26084771
GB110_268,GB110,"Scaillet, B., France-Lanord, C. & Le Fort, P. 1990. Badrinath-Gangotri plutons (Garhwal, India): petrological and geochemical evidence for fractionation processes in a high Himalayan leucogranite. Journal of Volcanology and Geothermal Research, 44, 163–188, https://doi.org/10.1016/0377-0273(90)90017-A.",Natural s-type granite,-1,-1,-1,-1,-1,-1,-1,-1,-1,74.46,0.06,15.21,0.66,0.11,0.51,4.52,4.46,2,20,47,0.5,Natural,Natural,Natural,Natural,Natural,Nat,1.23927774,0.145999116,0.002762467,0.298411807,0.094770797,0.009024829,0.000760407,0.009254224,0.78,16.18,1.19,22.98858159
GL29_269,GL29,"Scaillet, B., France-Lanord, C. & Le Fort, P. 1990. Badrinath-Gangotri plutons (Garhwal, India): petrological and geochemical evidence for fractionation processes in a high Himalayan leucogranite. Journal of Volcanology and Geothermal Research, 44, 163–188, https://doi.org/10.1016/0377-0273(90)90017-A.",Natural s-type granite,-1,-1,-1,-1,-1,-1,-1,-1,-1,74.32,0.07,15.23,0.71,0.12,0.6,4.42,4.53,2,20,47,0.5,Natural,Natural,Natural,Natural,Natural,Nat,1.236986453,0.142682383,0.003012533,0.298703104,0.09624101,0.010645528,0.000886828,0.009884575,0.83,13.4,1.2,23.35820804
GL11_270,GL11,"Scaillet, B., France-Lanord, C. & Le Fort, P. 1990. Badrinath-Gangotri plutons (Garhwal, India): petrological and geochemical evidence for fractionation processes in a high Himalayan leucogranite. Journal of Volcanology and Geothermal Research, 44, 163–188, https://doi.org/10.1016/0377-0273(90)90017-A.",Natural s-type granite,-1,-1,-1,-1,-1,-1,-1,-1,-1,74.28,0.08,15.24,0.76,0.12,0.48,4.65,4.4,2,20,47,0.5,Natural,Natural,Natural,Natural,Natural,Nat,1.2362937,0.150169205,0.003012076,0.298856249,0.093434131,0.00847905,0.001013363,0.010516606,0.88,17.71,1.19,22.26437375
GL89_271,GL89,"Scaillet, B., France-Lanord, C. & Le Fort, P. 1990. Badrinath-Gangotri plutons (Garhwal, India): petrological and geochemical evidence for fractionation processes in a high Himalayan leucogranite. Journal of Volcanology and Geothermal Research, 44, 163–188, https://doi.org/10.1016/0377-0273(90)90017-A.",Natural s-type granite,-1,-1,-1,-1,-1,-1,-1,-1,-1,73.98,0.09,15.39,0.79,0.11,0.58,4.17,4.89,2,20,47,0.5,Natural,Natural,Natural,Natural,Natural,Nat,1.231331494,0.134532239,0.002768464,0.301845321,0.103806567,0.010310641,0.001143087,0.011052951,0.91,13.05,1.21,20.03025109
GB113_272,GB113,"Scaillet, B., France-Lanord, C. & Le Fort, P. 1990. Badrinath-Gangotri plutons (Garhwal, India): petrological and geochemical evidence for fractionation processes in a high Himalayan leucogranite. Journal of Volcanology and Geothermal Research, 44, 163–188, https://doi.org/10.1016/0377-0273(90)90017-A.",Natural s-type granite,-1,-1,-1,-1,-1,-1,-1,-1,-1,73.5,0.1,15.55,0.83,0.15,0.67,4.06,5.13,2,20,47,0.5,Natural,Natural,Natural,Natural,Natural,Nat,1.223425654,0.131043289,0.003778398,0.305089931,0.108852752,0.01194882,0.00127118,0.011570993,0.98,10.97,1.21,24.6159483
GL15_273,GL15,"Scaillet, B., France-Lanord, C. & Le Fort, P. 1990. Badrinath-Gangotri plutons (Garhwal, India): petrological and geochemical evidence for fractionation processes in a high Himalayan leucogranite. Journal of Volcanology and Geothermal Research, 44, 163–188, https://doi.org/10.1016/0377-0273(90)90017-A.",Natural s-type granite,-1,-1,-1,-1,-1,-1,-1,-1,-1,73.28,0.1,15.95,0.82,0.17,0.71,4.02,4.95,2,20,47,0.5,Natural,Natural,Natural,Natural,Natural,Nat,1.219788399,0.129637981,0.004268275,0.312832802,0.105061562,0.012631824,0.001267051,0.011406666,0.99,10.26,1.26,27.22992581
GL14_274,GL14,"Scaillet, B., France-Lanord, C. & Le Fort, P. 1990. Badrinath-Gangotri plutons (Garhwal, India): petrological and geochemical evidence for fractionation processes in a high Himalayan leucogranite. Journal of Volcanology and Geothermal Research, 44, 163–188, https://doi.org/10.1016/0377-0273(90)90017-A.",Natural s-type granite,-1,-1,-1,-1,-1,-1,-1,-1,-1,73.29,0.12,15.73,0.87,0.2,0.77,3.81,5.21,2,20,47,0.5,Natural,Natural,Natural,Natural,Natural,Nat,1.219931278,0.122897124,0.005080313,0.308463877,0.110639398,0.013692613,0.001538269,0.012053165,1.07,8.98,1.25,29.65138204
Fab89_275,Fab89,"Solgadi, F., Moyen, J.F., Vanderhaeghe, O., Sawyer, E.W. & Reisberg, L. 2007. The role of crustal anatexis and mantle-derived magmas in the genesis of synorogenic Hercynian granites of the Livradois area, French massif central. Canadian Mineralogist, 45, 581–606, https://doi.org/10.2113/gscanmin.45.3.581.",Natural s-type granite,-1,-1,-1,-1,-1,-1,-1,-1,-1,77.99,0.05,14.08,0.44,0.11,0.14,3.11,4.08,2,20,47,0.5,Natural,Natural,Natural,Natural,Natural,Nat,1.298145321,0.100314558,0.002781753,0.276103634,0.086560022,0.002544594,0.000638096,0.006127451,0.55,39.42,1.46,31.22335975
F132_276,F132,"Solgadi, F., Moyen, J.F., Vanderhaeghe, O., Sawyer, E.W. & Reisberg, L. 2007. The role of crustal anatexis and mantle-derived magmas in the genesis of synorogenic Hercynian granites of the Livradois area, French massif central. Canadian Mineralogist, 45, 581–606, https://doi.org/10.2113/gscanmin.45.3.581.",Natural s-type granite,-1,-1,-1,-1,-1,-1,-1,-1,-1,75.92,0,14.7,0.67,0.1,0.49,3.68,4.45,2,20,47,0.5,Natural,Natural,Natural,Natural,Natural,Nat,1.263674687,0.118644725,0.002520006,0.288285443,0.094451143,0.008693755,0,0.009286182,0.77,13.65,1.3,21.34478911
32B_277,32B,"Solgadi, F., Moyen, J.F., Vanderhaeghe, O., Sawyer, E.W. & Reisberg, L. 2007. The role of crustal anatexis and mantle-derived magmas in the genesis of synorogenic Hercynian granites of the Livradois area, French massif central. Canadian Mineralogist, 45, 581–606, https://doi.org/10.2113/gscanmin.45.3.581.",Natural s-type granite,-1,-1,-1,-1,-1,-1,-1,-1,-1,76.22,0.03,14.89,0.65,0.16,0.45,3.56,4.05,2,20,47,0.5,Natural,Natural,Natural,Natural,Natural,Nat,1.268586187,0.114729782,0.004055819,0.291991894,0.085898455,0.008016335,0.000383769,0.0090851,0.82,14.31,1.4,30.86404427
Fab36_278,Fab36,"Solgadi, F., Moyen, J.F., Vanderhaeghe, O., Sawyer, E.W. & Reisberg, L. 2007. The role of crustal anatexis and mantle-derived magmas in the genesis of synorogenic Hercynian granites of the Livradois area, French massif central. Canadian Mineralogist, 45, 581–606, https://doi.org/10.2113/gscanmin.45.3.581.",Natural s-type granite,-1,-1,-1,-1,-1,-1,-1,-1,-1,76.66,0,14.36,0.72,0.13,0.36,3.45,4.32,2,20,47,0.5,Natural,Natural,Natural,Natural,Natural,Nat,1.275941058,0.111350825,0.003283211,0.281731282,0.091633197,0.006353135,0,0.010071526,0.86,17.53,1.35,24.5846163
F161_279,F161,"Solgadi, F., Moyen, J.F., Vanderhaeghe, O., Sawyer, E.W. & Reisberg, L. 2007. The role of crustal anatexis and mantle-derived magmas in the genesis of synorogenic Hercynian granites of the Livradois area, French massif central. Canadian Mineralogist, 45, 581–606, https://doi.org/10.2113/gscanmin.45.3.581.",Natural s-type granite,-1,-1,-1,-1,-1,-1,-1,-1,-1,76.09,0,14.57,0.74,0.16,0.48,3.8,4.16,2,20,47,0.5,Natural,Natural,Natural,Natural,Natural,Nat,1.266434863,0.122550335,0.004031109,0.285830862,0.088393432,0.008510734,0,0.010301545,0.9,14.4,1.3,28.12534998
SGL2K23a_280,SGL2K23a,"Solgadi, F., Moyen, J.F., Vanderhaeghe, O., Sawyer, E.W. & Reisberg, L. 2007. The role of crustal anatexis and mantle-derived magmas in the genesis of synorogenic Hercynian granites of the Livradois area, French massif central. Canadian Mineralogist, 45, 581–606, https://doi.org/10.2113/gscanmin.45.3.581.",Natural s-type granite,-1,-1,-1,-1,-1,-1,-1,-1,-1,75.96,0,14.29,0.86,0.12,0.29,3.5,4.97,2,20,47,0.5,Natural,Natural,Natural,Natural,Natural,Nat,1.264364255,0.113074206,0.003024039,0.280319214,0.105449992,0.005252532,0,0.011957676,0.98,21.53,1.25,20.1848659
SGL2K12_281,SGL2K12,"Solgadi, F., Moyen, J.F., Vanderhaeghe, O., Sawyer, E.W. & Reisberg, L. 2007. The role of crustal anatexis and mantle-derived magmas in the genesis of synorogenic Hercynian granites of the Livradois area, French massif central. Canadian Mineralogist, 45, 581–606, https://doi.org/10.2113/gscanmin.45.3.581.",Natural s-type granite,-1,-1,-1,-1,-1,-1,-1,-1,-1,76.69,0.11,14.01,0.98,0.14,0.2,3.66,4.21,2,20,47,0.5,Natural,Natural,Natural,Natural,Natural,Nat,1.276474987,0.117953877,0.003536776,0.274821385,0.089281415,0.0036314,0.00140237,0.013645078,1.12,32.48,1.3,20.58436595
SGL2K3a_282,SGL2K3a,"Solgadi, F., Moyen, J.F., Vanderhaeghe, O., Sawyer, E.W. & Reisberg, L. 2007. The role of crustal anatexis and mantle-derived magmas in the genesis of synorogenic Hercynian granites of the Livradois area, French massif central. Canadian Mineralogist, 45, 581–606, https://doi.org/10.2113/gscanmin.45.3.581.",Natural s-type granite,-1,-1,-1,-1,-1,-1,-1,-1,-1,73.37,0.15,15.55,0.81,0.27,0.77,3.69,5.38,2,20,47,0.5,Natural,Natural,Natural,Natural,Natural,Nat,1.221271655,0.119123746,0.006812667,0.305009608,0.114219599,0.013782614,0.001910008,0.011208535,1.08,8.64,1.23,37.80362215
SGL2K20b_283,SGL2K20b,"Solgadi, F., Moyen, J.F., Vanderhaeghe, O., Sawyer, E.W. & Reisberg, L. 2007. The role of crustal anatexis and mantle-derived magmas in the genesis of synorogenic Hercynian granites of the Livradois area, French massif central. Canadian Mineralogist, 45, 581–606, https://doi.org/10.2113/gscanmin.45.3.581.",Natural s-type granite,-1,-1,-1,-1,-1,-1,-1,-1,-1,76.06,0.09,15.18,1.02,0.2,0.62,2.19,4.64,2,20,47,0.5,Natural,Natural,Natural,Natural,Natural,Nat,1.2659238,0.070600651,0.005049658,0.297819676,0.098520891,0.011069458,0.00114674,0.014147109,1.22,6.38,1.65,26.3047305
Fab152_284,Fab152,"Solgadi, F., Moyen, J.F., Vanderhaeghe, O., Sawyer, E.W. & Reisberg, L. 2007. The role of crustal anatexis and mantle-derived magmas in the genesis of synorogenic Hercynian granites of the Livradois area, French massif central. Canadian Mineralogist, 45, 581–606, https://doi.org/10.2113/gscanmin.45.3.581.",Natural s-type granite,-1,-1,-1,-1,-1,-1,-1,-1,-1,74.21,0.17,15.59,1.07,0.19,0.49,3.49,4.78,2,20,47,0.5,Natural,Natural,Natural,Natural,Natural,Nat,1.235173566,0.112666603,0.004812651,0.305789416,0.101439755,0.008738494,0.002173053,0.014959925,1.27,12.89,1.37,24.34003099
F165B_285,F165B,"Solgadi, F., Moyen, J.F., Vanderhaeghe, O., Sawyer, E.W. & Reisberg, L. 2007. The role of crustal anatexis and mantle-derived magmas in the genesis of synorogenic Hercynian granites of the Livradois area, French massif central. Canadian Mineralogist, 45, 581–606, https://doi.org/10.2113/gscanmin.45.3.581.",Natural s-type granite,-1,-1,-1,-1,-1,-1,-1,-1,-1,75.18,0.12,14.62,1,0.25,0.63,3.2,5,2,20,47,0.5,Natural,Natural,Natural,Natural,Natural,Nat,1.251367725,0.103215488,0.006298484,0.286821118,0.106070022,0.011226704,0.001525695,0.013862299,1.25,9.19,1.3,31.24126533
SGL2K25a_286,SGL2K25a,"Solgadi, F., Moyen, J.F., Vanderhaeghe, O., Sawyer, E.W. & Reisberg, L. 2007. The role of crustal anatexis and mantle-derived magmas in the genesis of synorogenic Hercynian granites of the Livradois area, French massif central. Canadian Mineralogist, 45, 581–606, https://doi.org/10.2113/gscanmin.45.3.581.",Natural s-type granite,-1,-1,-1,-1,-1,-1,-1,-1,-1,74.72,0.12,15.09,1.19,0.27,0.85,3.54,4.22,2,20,47,0.5,Natural,Natural,Natural,Natural,Natural,Nat,1.243645206,0.114110853,0.006807273,0.295997798,0.089534219,0.015221354,0.001526797,0.016544952,1.46,7.5,1.35,29.15042494
Fab8_287,Fab8,"Solgadi, F., Moyen, J.F., Vanderhaeghe, O., Sawyer, E.W. & Reisberg, L. 2007. The role of crustal anatexis and mantle-derived magmas in the genesis of synorogenic Hercynian granites of the Livradois area, French massif central. Canadian Mineralogist, 45, 581–606, https://doi.org/10.2113/gscanmin.45.3.581.",Natural s-type granite,-1,-1,-1,-1,-1,-1,-1,-1,-1,74.13,0.24,15.77,1.2,0.33,0.4,3.28,4.66,2,20,47,0.5,Natural,Natural,Natural,Natural,Natural,Nat,1.233780955,0.105941463,0.008145686,0.309317272,0.098892893,0.007135212,0.002954582,0.016704512,1.53,14.85,1.46,32.77915846
SGL2K14_288,SGL2K14,"Solgadi, F., Moyen, J.F., Vanderhaeghe, O., Sawyer, E.W. & Reisberg, L. 2007. The role of crustal anatexis and mantle-derived magmas in the genesis of synorogenic Hercynian granites of the Livradois area, French massif central. Canadian Mineralogist, 45, 581–606, https://doi.org/10.2113/gscanmin.45.3.581.",Natural s-type granite,-1,-1,-1,-1,-1,-1,-1,-1,-1,73.34,0.23,15.9,1.56,0.52,0.51,3.65,4.29,2,20,47,0.5,Natural,Natural,Natural,Natural,Natural,Nat,1.220779301,0.117875392,0.012947526,0.311903514,0.091025317,0.009123285,0.002818577,0.021657888,2.08,12.92,1.43,37.41474157
SGL2K19_289,SGL2K19,"Solgadi, F., Moyen, J.F., Vanderhaeghe, O., Sawyer, E.W. & Reisberg, L. 2007. The role of crustal anatexis and mantle-derived magmas in the genesis of synorogenic Hercynian granites of the Livradois area, French massif central. Canadian Mineralogist, 45, 581–606, https://doi.org/10.2113/gscanmin.45.3.581.",Natural s-type granite,-1,-1,-1,-1,-1,-1,-1,-1,-1,72.96,0.25,16.06,1.78,0.6,0.54,3.58,4.23,2,20,47,0.5,Natural,Natural,Natural,Natural,Natural,Nat,1.214403856,0.11555707,0.014977598,0.315095678,0.089716386,0.009670092,0.003074623,0.024732057,2.38,11.95,1.47,37.71777418
SGE01-54_290,SGE01-54,"Solgadi, F., Moyen, J.F., Vanderhaeghe, O., Sawyer, E.W. & Reisberg, L. 2007. The role of crustal anatexis and mantle-derived magmas in the genesis of synorogenic Hercynian granites of the Livradois area, French massif central. Canadian Mineralogist, 45, 581–606, https://doi.org/10.2113/gscanmin.45.3.581.",Natural s-type granite,-1,-1,-1,-1,-1,-1,-1,-1,-1,71.97,0.32,15.66,1.97,0.82,1.59,3.45,4.22,2,20,47,0.5,Natural,Natural,Natural,Natural,Natural,Nat,1.197837924,0.111335252,0.020454068,0.307245785,0.089675609,0.028312869,0.003950453,0.027406017,2.79,3.93,1.34,42.73721703
SGL2K28_291,SGL2K28,"Solgadi, F., Moyen, J.F., Vanderhaeghe, O., Sawyer, E.W. & Reisberg, L. 2007. The role of crustal anatexis and mantle-derived magmas in the genesis of synorogenic Hercynian granites of the Livradois area, French massif central. Canadian Mineralogist, 45, 581–606, https://doi.org/10.2113/gscanmin.45.3.581.",Natural s-type granite,-1,-1,-1,-1,-1,-1,-1,-1,-1,72.09,0.3,16.17,2.2,0.8,1.28,3.59,3.57,2,20,47,0.5,Natural,Natural,Natural,Natural,Natural,Nat,1.199963187,0.115706471,0.019883302,0.317213212,0.075692864,0.022901742,0.003730632,0.030625532,3,5.05,1.48,39.3659893
F82A_292,F82A,"Solgadi, F., Moyen, J.F., Vanderhaeghe, O., Sawyer, E.W. & Reisberg, L. 2007. The role of crustal anatexis and mantle-derived magmas in the genesis of synorogenic Hercynian granites of the Livradois area, French massif central. Canadian Mineralogist, 45, 581–606, https://doi.org/10.2113/gscanmin.45.3.581.",Natural s-type granite,-1,-1,-1,-1,-1,-1,-1,-1,-1,72.38,0.25,16.06,1.88,0.66,0.71,3.29,4.78,2,20,47,0.5,Natural,Natural,Natural,Natural,Natural,Nat,1.204808427,0.106157235,0.016273697,0.315012567,0.101396677,0.012610141,0.003079697,0.026184796,2.54,8.42,1.43,38.32848495
F84_293,F84,"Solgadi, F., Moyen, J.F., Vanderhaeghe, O., Sawyer, E.W. & Reisberg, L. 2007. The role of crustal anatexis and mantle-derived magmas in the genesis of synorogenic Hercynian granites of the Livradois area, French massif central. Canadian Mineralogist, 45, 581–606, https://doi.org/10.2113/gscanmin.45.3.581.",Natural s-type granite,-1,-1,-1,-1,-1,-1,-1,-1,-1,69.43,0.56,16.27,4.23,1.76,1.13,2.66,3.96,2,20,47,0.5,Natural,Natural,Natural,Natural,Natural,Nat,1.155693575,0.085920576,0.043616942,0.319221879,0.084033294,0.020165843,0.006950938,0.058842088,5.99,4.26,1.68,42.57012975
MA 089_294,MA 089,"Villaros, A. 2004. Fusion Partielle D’une Croute Hétérogène (Metapelites et Orthogneiss) À Moyenne to Haute Pression. Grenoble University.",Natural s-type granite,-1,-1,-1,-1,-1,-1,-1,-1,-1,77.02,0.09,14.14,0.45,0.17,0.21,3.88,4.05,2,20,47,0.5,Natural,Natural,Natural,Natural,Natural,Nat,1.281964929,0.125046238,0.00423442,0.27726835,0.085897715,0.00375949,0.001131301,0.006286773,0.62,33.26,1.29,40.24657619
MA 018_295,MA 018,"Villaros, A. 2004. Fusion Partielle D’une Croute Hétérogène (Metapelites et Orthogneiss) À Moyenne to Haute Pression. Grenoble University.",Natural s-type granite,-1,-1,-1,-1,-1,-1,-1,-1,-1,76.36,0.09,14.15,0.87,0.21,0.36,3.63,4.33,2,20,47,0.5,Natural,Natural,Natural,Natural,Natural,Nat,1.270944296,0.11702503,0.005234227,0.277649483,0.091926785,0.006449118,0.001132052,0.012078618,1.08,18.15,1.29,30.23319887
MA 155_296,MA 155,"Villaros, A. 2004. Fusion Partielle D’une Croute Hétérogène (Metapelites et Orthogneiss) À Moyenne to Haute Pression. Grenoble University.",Natural s-type granite,-1,-1,-1,-1,-1,-1,-1,-1,-1,75.58,0.1,14.58,0.93,0.19,0.28,3.77,4.57,2,20,47,0.5,Natural,Natural,Natural,Natural,Natural,Nat,1.258013079,0.121686656,0.004753206,0.285992052,0.096975672,0.005034492,0.001262477,0.012880893,1.12,24.17,1.28,26.95462892
MA 224a_297,MA 224a,"Villaros, A. 2004. Fusion Partielle D’une Croute Hétérogène (Metapelites et Orthogneiss) À Moyenne to Haute Pression. Grenoble University.",Natural s-type granite,-1,-1,-1,-1,-1,-1,-1,-1,-1,73.89,0.09,15.35,0.87,0.32,0.57,4.14,4.77,2,20,47,0.5,Natural,Natural,Natural,Natural,Natural,Nat,1.229853777,0.133698583,0.008042946,0.301044326,0.101301912,0.010116209,0.001141559,0.012053178,1.19,13.22,1.23,40.02237551
MA 042_298,MA 042,"Villaros, A. 2004. Fusion Partielle D’une Croute Hétérogène (Metapelites et Orthogneiss) À Moyenne to Haute Pression. Grenoble University.",Natural s-type granite,-1,-1,-1,-1,-1,-1,-1,-1,-1,75.09,0.11,14.41,1.1,0.51,0.58,2.73,5.46,2,20,47,0.5,Natural,Natural,Natural,Natural,Natural,Nat,1.249870043,0.087943506,0.012725251,0.28267994,0.115938467,0.010401327,0.001385094,0.015366281,1.62,8.46,1.32,45.29924106
MA 033_299,MA 033,"Villaros, A. 2004. Fusion Partielle D’une Croute Hétérogène (Metapelites et Orthogneiss) À Moyenne to Haute Pression. Grenoble University.",Natural s-type granite,-1,-1,-1,-1,-1,-1,-1,-1,-1,74.83,0.17,14.42,1.36,0.38,0.49,2.46,5.88,2,20,47,0.5,Natural,Natural,Natural,Natural,Natural,Nat,1.245534628,0.079528558,0.009484235,0.282759712,0.124941332,0.008789808,0.002141205,0.0188983,1.74,9.05,1.33,33.41574309
MA 035c_300,MA 035c,"Villaros, A. 2004. Fusion Partielle D’une Croute Hétérogène (Metapelites et Orthogneiss) À Moyenne to Haute Pression. Grenoble University.",Natural s-type granite,-1,-1,-1,-1,-1,-1,-1,-1,-1,75.66,0.2,13.85,1.47,0.38,0.52,2.82,5.09,2,20,47,0.5,Natural,Natural,Natural,Natural,Natural,Nat,1.259383859,0.090997252,0.009529483,0.271618258,0.108155312,0.009192223,0.002531082,0.020507539,1.86,9.9,1.3,31.72579244
MA 319_301,MA 319,"Villaros, A. 2004. Fusion Partielle D’une Croute Hétérogène (Metapelites et Orthogneiss) À Moyenne to Haute Pression. Grenoble University.",Natural s-type granite,-1,-1,-1,-1,-1,-1,-1,-1,-1,75.1,0.21,14.22,1.58,0.41,0.3,2.37,5.8,2,20,47,0.5,Natural,Natural,Natural,Natural,Natural,Nat,1.250026899,0.07648565,0.010260243,0.278962311,0.123132639,0.005395847,0.002652062,0.021980411,1.99,14.17,1.36,31.82392946
MA 10_302,MA 10,"Villaros, A. 2004. Fusion Partielle D’une Croute Hétérogène (Metapelites et Orthogneiss) À Moyenne to Haute Pression. Grenoble University.",Natural s-type granite,-1,-1,-1,-1,-1,-1,-1,-1,-1,72.51,0.42,15.05,2.86,1.36,0.86,3.32,3.63,2,20,47,0.5,Natural,Natural,Natural,Natural,Natural,Nat,1.206960485,0.107005444,0.033669436,0.295208494,0.077119775,0.015283685,0.005237917,0.039742699,4.21,7,1.48,45.86358352
AS46_303,AS46,"Williamson, B.J., Shaw, A., Downes, H. & Thirlwall, M.F. 1996. Geochemical constraints on the genesis of Hercynian two-mica leucogranites from the Massif Central, France. Chemical Geology, 127, 25–42, https://doi.org/10.1016/0009-2541(95)00105-0.",Natural s-type granite,-1,-1,-1,-1,-1,-1,-1,-1,-1,71.49,0.37,15.43,2.27,1.17,1.15,3.28,4.82,2,20,47,0.5,Natural,Natural,Natural,Natural,Natural,Nat,1.189977961,0.105976997,0.029083584,0.302678521,0.102338694,0.020542788,0.004681469,0.031640455,3.45,5.16,1.32,47.89468003
AS17_304,AS17,"Williamson, B.J., Shaw, A., Downes, H. & Thirlwall, M.F. 1996. Geochemical constraints on the genesis of Hercynian two-mica leucogranites from the Massif Central, France. Chemical Geology, 127, 25–42, https://doi.org/10.1016/0009-2541(95)00105-0.",Natural s-type granite,-1,-1,-1,-1,-1,-1,-1,-1,-1,70.6,0.38,15.65,2.52,1.3,1.46,3.52,4.56,2,20,47,0.5,Natural,Natural,Natural,Natural,Natural,Nat,1.175133453,0.113571226,0.032277084,0.307007455,0.096777537,0.026075772,0.004798204,0.035112532,3.82,4.36,1.3,47.89622772
MG25_305,MG25,"Williamson, B.J., Shaw, A., Downes, H. & Thirlwall, M.F. 1996. Geochemical constraints on the genesis of Hercynian two-mica leucogranites from the Massif Central, France. Chemical Geology, 127, 25–42, https://doi.org/10.1016/0009-2541(95)00105-0.",Natural s-type granite,-1,-1,-1,-1,-1,-1,-1,-1,-1,76.57,0.06,13.89,0.48,0.09,0.4,4.05,4.46,2,20,47,0.5,Natural,Natural,Natural,Natural,Natural,Nat,1.274480429,0.130675389,0.002238291,0.272514731,0.094703426,0.007149879,0.000715384,0.006653693,0.57,18.28,1.17,25.17201227
MG26_306,MG26,"Williamson, B.J., Shaw, A., Downes, H. & Thirlwall, M.F. 1996. Geochemical constraints on the genesis of Hercynian two-mica leucogranites from the Massif Central, France. Chemical Geology, 127, 25–42, https://doi.org/10.1016/0009-2541(95)00105-0.",Natural s-type granite,-1,-1,-1,-1,-1,-1,-1,-1,-1,76.82,0.06,13.98,0.53,0.11,0.37,3.94,4.19,2,20,47,0.5,Natural,Natural,Natural,Natural,Natural,Nat,1.278655089,0.127167754,0.002750772,0.274214882,0.089019841,0.006650101,0.000694089,0.007321544,0.64,19.12,1.23,27.31022347
MI18_307,MI18,"Williamson, B.J., Shaw, A., Downes, H. & Thirlwall, M.F. 1996. Geochemical constraints on the genesis of Hercynian two-mica leucogranites from the Massif Central, France. Chemical Geology, 127, 25–42, https://doi.org/10.1016/0009-2541(95)00105-0.",Natural s-type granite,-1,-1,-1,-1,-1,-1,-1,-1,-1,74.47,0.14,14.76,1.14,0.23,0.59,3.62,5.05,2,20,47,0.5,Natural,Natural,Natural,Natural,Natural,Nat,1.239559607,0.116699188,0.005716763,0.289452762,0.10719744,0.010539959,0.001743523,0.015934514,1.38,11.07,1.23,26.40381343
MI17_308,MI17,"Williamson, B.J., Shaw, A., Downes, H. & Thirlwall, M.F. 1996. Geochemical constraints on the genesis of Hercynian two-mica leucogranites from the Massif Central, France. Chemical Geology, 127, 25–42, https://doi.org/10.1016/0009-2541(95)00105-0.",Natural s-type granite,-1,-1,-1,-1,-1,-1,-1,-1,-1,73.93,0.18,15.04,1.38,0.3,0.48,3.53,5.15,2,20,47,0.5,Natural,Natural,Natural,Natural,Natural,Nat,1.230453806,0.113874551,0.007504842,0.295081358,0.109388779,0.008630305,0.002310266,0.019194495,1.68,13.19,1.27,28.10872196
BW19_309,BW19,"Williamson, B.J., Shaw, A., Downes, H. & Thirlwall, M.F. 1996. Geochemical constraints on the genesis of Hercynian two-mica leucogranites from the Massif Central, France. Chemical Geology, 127, 25–42, https://doi.org/10.1016/0009-2541(95)00105-0.",Natural s-type granite,-1,-1,-1,-1,-1,-1,-1,-1,-1,74.53,0.05,15.34,0.76,0.12,0.46,4.43,4.32,2,20,47,0.5,Natural,Natural,Natural,Natural,Natural,Nat,1.240438612,0.142853761,0.002988794,0.300878226,0.091646268,0.008234499,0.000641026,0.010561044,0.88,17.35,1.24,22.0577863
BW55_310,BW55,"Williamson, B.J., Shaw, A., Downes, H. & Thirlwall, M.F. 1996. Geochemical constraints on the genesis of Hercynian two-mica leucogranites from the Massif Central, France. Chemical Geology, 127, 25–42, https://doi.org/10.1016/0009-2541(95)00105-0.",Natural s-type granite,-1,-1,-1,-1,-1,-1,-1,-1,-1,76.36,0.09,14.07,0.87,0.18,0.47,3.41,4.55,2,20,47,0.5,Natural,Natural,Natural,Natural,Natural,Nat,1.271019098,0.11009361,0.004481438,0.275959612,0.096510516,0.00841022,0.001155908,0.012065043,1.05,13.09,1.28,27.08393323
BW28_311,BW28,"Williamson, B.J., Shaw, A., Downes, H. & Thirlwall, M.F. 1996. Geochemical constraints on the genesis of Hercynian two-mica leucogranites from the Massif Central, France. Chemical Geology, 127, 25–42, https://doi.org/10.1016/0009-2541(95)00105-0.",Natural s-type granite,-1,-1,-1,-1,-1,-1,-1,-1,-1,74.57,0.08,15.1,1.08,0.17,0.5,3.9,4.59,2,20,47,0.5,Natural,Natural,Natural,Natural,Natural,Nat,1.241228764,0.125882177,0.004251712,0.296196151,0.097377342,0.008987721,0.001060193,0.015023624,1.25,14.01,1.28,22.0577863
HI 32_312,HI 32,"Williamson, B.J., Downes, H., Thirlwall, M.F. & Beard, A. 1997. Geochemical constraints on restite composition and unmixing in the Velay anatectic granite, French Massif Central. Lithos, 40, 295–319, https://doi.org/10.1016/S0024-4937(97)00033-9.",Natural s-type granite,-1,-1,-1,-1,-1,-1,-1,-1,-1,75.93,0.05,13.94,0.38,0.05,0.46,3.45,5.74,2,20,47,0.5,Natural,Natural,Natural,Natural,Natural,Nat,1.263766941,0.111485422,0.001242312,0.273434014,0.121827926,0.008214537,0.000639472,0.005267721,0.43,13.57,1.13,19.08303787
H21_313,H21,"Williamson, B.J., Downes, H., Thirlwall, M.F. & Beard, A. 1997. Geochemical constraints on restite composition and unmixing in the Velay anatectic granite, French Massif Central. Lithos, 40, 295–319, https://doi.org/10.1016/S0024-4937(97)00033-9.",Natural s-type granite,-1,-1,-1,-1,-1,-1,-1,-1,-1,74.32,0.17,14.85,0.96,0.32,1.14,3.35,4.9,2,20,47,0.5,Natural,Natural,Natural,Natural,Natural,Nat,1.236972705,0.10799562,0.007931823,0.291202072,0.103932328,0.020309184,0.002189029,0.013388119,1.28,5.32,1.25,37.20377268
H35_314,H35,"Williamson, B.J., Downes, H., Thirlwall, M.F. & Beard, A. 1997. Geochemical constraints on restite composition and unmixing in the Velay anatectic granite, French Massif Central. Lithos, 40, 295–319, https://doi.org/10.1016/S0024-4937(97)00033-9.",Natural s-type granite,-1,-1,-1,-1,-1,-1,-1,-1,-1,77.97,0.11,13.71,1.32,0.18,0.57,2.73,3.4,2,20,47,0.5,Natural,Natural,Natural,Natural,Natural,Nat,1.297825178,0.08809821,0.004466205,0.268940501,0.072189926,0.010164958,0.00141493,0.018411799,1.5,8.67,1.58,19.52182872
Hill_315,Hill,"Williamson, B.J., Downes, H., Thirlwall, M.F. & Beard, A. 1997. Geochemical constraints on restite composition and unmixing in the Velay anatectic granite, French Massif Central. Lithos, 40, 295–319, https://doi.org/10.1016/S0024-4937(97)00033-9.",Natural s-type granite,-1,-1,-1,-1,-1,-1,-1,-1,-1,73.1,0.25,14.99,1.45,0.47,1.49,3.85,4.4,2,20,47,0.5,Natural,Natural,Natural,Natural,Natural,Nat,1.21674516,0.124256762,0.011724135,0.294044607,0.093495048,0.026534399,0.00307159,0.020147247,1.92,4.68,1.2,36.78577562
H95_316,H95,"Williamson, B.J., Downes, H., Thirlwall, M.F. & Beard, A. 1997. Geochemical constraints on restite composition and unmixing in the Velay anatectic granite, French Massif Central. Lithos, 40, 295–319, https://doi.org/10.1016/S0024-4937(97)00033-9.",Natural s-type granite,-1,-1,-1,-1,-1,-1,-1,-1,-1,74.44,0.22,13.4,2.17,0.45,0.84,2.89,5.59,2,20,47,0.5,Natural,Natural,Natural,Natural,Natural,Nat,1.238966197,0.093108798,0.011224914,0.262877424,0.118679814,0.015059633,0.002731623,0.030220004,2.62,6.18,1.16,27.08393323
HI_317,HI,"Williamson, B.J., Downes, H., Thirlwall, M.F. & Beard, A. 1997. Geochemical constraints on restite composition and unmixing in the Velay anatectic granite, French Massif Central. Lithos, 40, 295–319, https://doi.org/10.1016/S0024-4937(97)00033-9.",Natural s-type granite,-1,-1,-1,-1,-1,-1,-1,-1,-1,73.23,0.3,14.46,2.21,0.75,1.04,3.02,4.99,2,20,47,0.5,Natural,Natural,Natural,Natural,Natural,Nat,1.218951745,0.097385021,0.018719483,0.283558059,0.10593655,0.018477126,0.003791313,0.030742218,2.96,5.27,1.28,37.84642052
H32_318,H32,"Williamson, B.J., Downes, H., Thirlwall, M.F. & Beard, A. 1997. Geochemical constraints on restite composition and unmixing in the Velay anatectic granite, French Massif Central. Lithos, 40, 295–319, https://doi.org/10.1016/S0024-4937(97)00033-9.",Natural s-type granite,-1,-1,-1,-1,-1,-1,-1,-1,-1,70.86,0.6,15.68,2.74,0.81,1.11,2.67,5.55,2,20,47,0.5,Natural,Natural,Natural,Natural,Natural,Nat,1.179357,0.086103219,0.019985968,0.307522179,0.117792694,0.019751154,0.007526621,0.038085084,3.54,4.36,1.38,34.41640437
H36_319,H36,"Williamson, B.J., Downes, H., Thirlwall, M.F. & Beard, A. 1997. Geochemical constraints on restite composition and unmixing in the Velay anatectic granite, French Massif Central. Lithos, 40, 295–319, https://doi.org/10.1016/S0024-4937(97)00033-9.",Natural s-type granite,-1,-1,-1,-1,-1,-1,-1,-1,-1,69.12,0.54,15.86,3.06,1.33,1.76,3.76,4.57,2,20,47,0.5,Natural,Natural,Natural,Natural,Natural,Nat,1.15042816,0.121218837,0.032983512,0.311140221,0.097075665,0.031428641,0.006721105,0.042633643,4.39,3.86,1.25,43.61908659
H9_320,H9,"Williamson, B.J., Downes, H., Thirlwall, M.F. & Beard, A. 1997. Geochemical constraints on restite composition and unmixing in the Velay anatectic granite, French Massif Central. Lithos, 40, 295–319, https://doi.org/10.1016/S0024-4937(97)00033-9.",Natural s-type granite,-1,-1,-1,-1,-1,-1,-1,-1,-1,68.77,0.7,15.62,3.37,1.28,1.73,3.41,5.12,2,20,47,0.5,Natural,Natural,Natural,Natural,Natural,Nat,1.144627233,0.109918185,0.031661775,0.306488765,0.108801095,0.030819428,0.008743934,0.046941087,4.65,3.57,1.23,40.28068986
H70_321,H70,"Williamson, B.J., Downes, H., Thirlwall, M.F. & Beard, A. 1997. Geochemical constraints on restite composition and unmixing in the Velay anatectic granite, French Massif Central. Lithos, 40, 295–319, https://doi.org/10.1016/S0024-4937(97)00033-9.",Natural s-type granite,-1,-1,-1,-1,-1,-1,-1,-1,-1,70.06,0.6,15.49,3.41,1.34,1.47,3.46,4.16,2,20,47,0.5,Natural,Natural,Natural,Natural,Natural,Nat,1.166109583,0.111762278,0.033280177,0.303755239,0.088410881,0.026239935,0.007520083,0.047515228,4.76,4.26,1.34,41.19068073
H24_322,H24,"Williamson, B.J., Downes, H., Thirlwall, M.F. & Beard, A. 1997. Geochemical constraints on restite composition and unmixing in the Velay anatectic granite, French Massif Central. Lithos, 40, 295–319, https://doi.org/10.1016/S0024-4937(97)00033-9.",Natural s-type granite,-1,-1,-1,-1,-1,-1,-1,-1,-1,64.46,0.84,18.38,6.34,2.39,0.93,2.44,4.22,2,20,47,0.5,Natural,Natural,Natural,Natural,Natural,Nat,1.07293092,0.078752824,0.059300834,0.360621617,0.089499435,0.016544928,0.010480478,0.088288148,8.73,4.76,1.95,40.17971636
KB42_323,KB42,"Hine, R., Williams, I.S., Chappell, B.W. & White, A.J.R. 1978. Contrasts between i- and s-type granitoids of the kosciusko batholith. Journal of the Geological Society of Australia, 25, 219–234, https://doi.org/10.1080/00167617808729029.",Natural s-type granite,-1,-1,-1,-1,-1,-1,-1,-1,-1,76.02,0.13,13.2,1.24,0.44,0.97,2.83,5.17,2,20,47,0.5,Natural,Natural,Natural,Natural,Natural,Nat,1.265248203,0.091443275,0.010797517,0.258872341,0.109801402,0.017325719,0.001647363,0.017298791,1.68,5.28,1.18,38.43037603
KB43_324,KB43,"Hine, R., Williams, I.S., Chappell, B.W. & White, A.J.R. 1978. Contrasts between i- and s-type granitoids of the kosciusko batholith. Journal of the Geological Society of Australia, 25, 219–234, https://doi.org/10.1080/00167617808729029.",Natural s-type granite,-1,-1,-1,-1,-1,-1,-1,-1,-1,76.94,0.23,12.27,1.74,0.72,1.28,2.67,4.14,2,20,47,0.5,Natural,Natural,Natural,Natural,Natural,Nat,1.280630902,0.086066503,0.017932998,0.240621389,0.087967149,0.022873345,0.002931655,0.024258295,2.47,3.76,1.22,42.50402595
KB45_325,KB45,"Hine, R., Williams, I.S., Chappell, B.W. & White, A.J.R. 1978. Contrasts between i- and s-type granitoids of the kosciusko batholith. Journal of the Geological Society of Australia, 25, 219–234, https://doi.org/10.1080/00167617808729029.",Natural s-type granite,-1,-1,-1,-1,-1,-1,-1,-1,-1,74.92,0.24,13.6,1.95,0.76,1.28,2.65,4.6,2,20,47,0.5,Natural,Natural,Natural,Natural,Natural,Nat,1.246949865,0.0855082,0.018892534,0.266861777,0.097646954,0.022812038,0.003050919,0.027076119,2.71,3.75,1.3,41.09873332
KB55_326,KB55,"Hine, R., Williams, I.S., Chappell, B.W. & White, A.J.R. 1978. Contrasts between i- and s-type granitoids of the kosciusko batholith. Journal of the Geological Society of Australia, 25, 219–234, https://doi.org/10.1080/00167617808729029.",Natural s-type granite,-1,-1,-1,-1,-1,-1,-1,-1,-1,73.91,0.24,13.7,2.97,0.67,2.2,2.51,3.79,2,20,47,0.5,Natural,Natural,Natural,Natural,Natural,Nat,1.230198018,0.080881343,0.016684718,0.268812741,0.080472859,0.039245808,0.003061799,0.041354656,3.64,2.06,1.34,28.74723984
KB57_327,KB57,"Hine, R., Williams, I.S., Chappell, B.W. & White, A.J.R. 1978. Contrasts between i- and s-type granitoids of the kosciusko batholith. Journal of the Geological Society of Australia, 25, 219–234, https://doi.org/10.1080/00167617808729029.",Natural s-type granite,-1,-1,-1,-1,-1,-1,-1,-1,-1,74.24,0.35,13.49,2.54,0.93,1.85,2.68,3.92,2,20,47,0.5,Natural,Natural,Natural,Natural,Natural,Nat,1.235731768,0.086338971,0.023057311,0.264620028,0.08325878,0.032961763,0.004347471,0.035422341,3.47,2.62,1.31,39.42792103
KB10_328,KB10,"Hine, R., Williams, I.S., Chappell, B.W. & White, A.J.R. 1978. Contrasts between i- and s-type granitoids of the kosciusko batholith. Journal of the Geological Society of Australia, 25, 219–234, https://doi.org/10.1080/00167617808729029.",Natural s-type granite,-1,-1,-1,-1,-1,-1,-1,-1,-1,73.16,0.37,13.97,2.63,1.1,1.99,2.6,4.18,2,20,47,0.5,Natural,Natural,Natural,Natural,Natural,Nat,1.217772612,0.083778956,0.027282252,0.274007969,0.088844353,0.035404271,0.004589332,0.036676061,3.73,2.37,1.32,42.6563032
KB44_329,KB44,"Hine, R., Williams, I.S., Chappell, B.W. & White, A.J.R. 1978. Contrasts between i- and s-type granitoids of the kosciusko batholith. Journal of the Geological Society of Australia, 25, 219–234, https://doi.org/10.1080/00167617808729029.",Natural s-type granite,-1,-1,-1,-1,-1,-1,-1,-1,-1,72.55,0.44,14.13,3,1.22,1.89,2.6,4.18,2,20,47,0.5,Natural,Natural,Natural,Natural,Natural,Nat,1.20750159,0.08374885,0.030168505,0.277192602,0.088728203,0.033708789,0.005501306,0.041785016,4.22,2.48,1.34,41.92776736
KB31_330,KB31,"Hine, R., Williams, I.S., Chappell, B.W. & White, A.J.R. 1978. Contrasts between i- and s-type granitoids of the kosciusko batholith. Journal of the Geological Society of Australia, 25, 219–234, https://doi.org/10.1080/00167617808729029.",Natural s-type granite,-1,-1,-1,-1,-1,-1,-1,-1,-1,72.6,0.43,14.09,3,1.28,2.09,2.5,4.01,2,20,47,0.5,Natural,Natural,Natural,Natural,Natural,Nat,1.208469312,0.080664333,0.031643693,0.276390721,0.08513365,0.037298864,0.005365584,0.04175288,4.28,2.16,1.36,43.11331137
KB13_331,KB13,"Hine, R., Williams, I.S., Chappell, B.W. & White, A.J.R. 1978. Contrasts between i- and s-type granitoids of the kosciusko batholith. Journal of the Geological Society of Australia, 25, 219–234, https://doi.org/10.1080/00167617808729029.",Natural s-type granite,-1,-1,-1,-1,-1,-1,-1,-1,-1,72.18,0.47,14.21,3.26,1.37,2.22,2.51,3.78,2,20,47,0.5,Natural,Natural,Natural,Natural,Natural,Nat,1.201355867,0.080960533,0.0339082,0.278678643,0.080335112,0.039647976,0.005874194,0.045426772,4.63,2.04,1.39,42.74054603
KB51_332,KB51,"Hine, R., Williams, I.S., Chappell, B.W. & White, A.J.R. 1978. Contrasts between i- and s-type granitoids of the kosciusko batholith. Journal of the Geological Society of Australia, 25, 219–234, https://doi.org/10.1080/00167617808729029.",Natural s-type granite,-1,-1,-1,-1,-1,-1,-1,-1,-1,70.93,0.49,14.52,3.65,1.76,2.75,2.22,3.67,2,20,47,0.5,Natural,Natural,Natural,Natural,Natural,Nat,1.180648025,0.071488303,0.043769478,0.284877931,0.077957428,0.049016501,0.006164171,0.050822366,5.42,1.46,1.44,46.2719368
KB12_333,KB12,"Hine, R., Williams, I.S., Chappell, B.W. & White, A.J.R. 1978. Contrasts between i- and s-type granitoids of the kosciusko batholith. Journal of the Geological Society of Australia, 25, 219–234, https://doi.org/10.1080/00167617808729029.",Natural s-type granite,-1,-1,-1,-1,-1,-1,-1,-1,-1,70.54,0.6,14.44,4.06,1.95,2.52,2.27,3.61,2,20,47,0.5,Natural,Natural,Natural,Natural,Natural,Nat,1.174170681,0.073304174,0.048492077,0.283215527,0.076690872,0.044888709,0.007559272,0.056487465,6.01,1.63,1.45,46.19193045
KB46_334,KB46,"Hine, R., Williams, I.S., Chappell, B.W. & White, A.J.R. 1978. Contrasts between i- and s-type granitoids of the kosciusko batholith. Journal of the Geological Society of Australia, 25, 219–234, https://doi.org/10.1080/00167617808729029.",Natural s-type granite,-1,-1,-1,-1,-1,-1,-1,-1,-1,70.48,0.63,14.61,4.19,1.89,2.24,2.27,3.68,2,20,47,0.5,Natural,Natural,Natural,Natural,Natural,Nat,1.173124434,0.073398271,0.046861096,0.286624244,0.078044019,0.040018091,0.007882822,0.058372932,6.08,1.83,1.5,44.53036441
KB47_335,KB47,"Hine, R., Williams, I.S., Chappell, B.W. & White, A.J.R. 1978. Contrasts between i- and s-type granitoids of the kosciusko batholith. Journal of the Geological Society of Australia, 25, 219–234, https://doi.org/10.1080/00167617808729029.",Natural s-type granite,-1,-1,-1,-1,-1,-1,-1,-1,-1,70.48,0.58,14.73,4.11,2,2.02,2.04,4.04,2,20,47,0.5,Natural,Natural,Natural,Natural,Natural,Nat,1.173040423,0.065856505,0.049618302,0.288877928,0.085789684,0.03602783,0.007319353,0.057213295,6.11,1.83,1.54,46.44534357
KB61_336,KB61,"Hine, R., Williams, I.S., Chappell, B.W. & White, A.J.R. 1978. Contrasts between i- and s-type granitoids of the kosciusko batholith. Journal of the Geological Society of Australia, 25, 219–234, https://doi.org/10.1080/00167617808729029.",Natural s-type granite,-1,-1,-1,-1,-1,-1,-1,-1,-1,70.12,0.59,14.6,4.22,2.08,2.36,2.08,3.94,2,20,47,0.5,Natural,Natural,Natural,Natural,Natural,Nat,1.167084759,0.06712243,0.051609465,0.286418334,0.083757866,0.042026744,0.007441352,0.058789974,6.3,1.6,1.48,46.74794166
KB56_337,KB56,"Hine, R., Williams, I.S., Chappell, B.W. & White, A.J.R. 1978. Contrasts between i- and s-type granitoids of the kosciusko batholith. Journal of the Geological Society of Australia, 25, 219–234, https://doi.org/10.1080/00167617808729029.",Natural s-type granite,-1,-1,-1,-1,-1,-1,-1,-1,-1,69.29,0.57,14.49,4.39,2.16,3.49,2.21,3.39,2,20,47,0.5,Natural,Natural,Natural,Natural,Natural,Nat,1.153337751,0.071382876,0.053614768,0.28425692,0.071971661,0.062276034,0.007180927,0.061067958,6.55,1.15,1.38,46.75051784
KB27_338,KB27,"Hine, R., Williams, I.S., Chappell, B.W. & White, A.J.R. 1978. Contrasts between i- and s-type granitoids of the kosciusko batholith. Journal of the Geological Society of Australia, 25, 219–234, https://doi.org/10.1080/00167617808729029.",Natural s-type granite,-1,-1,-1,-1,-1,-1,-1,-1,-1,69.71,0.57,14.8,4.15,2.31,2.51,1.88,4.06,2,20,47,0.5,Natural,Natural,Natural,Natural,Natural,Nat,1.160351195,0.060755369,0.057376885,0.290234778,0.086248309,0.04470532,0.007174755,0.057796631,6.46,1.36,1.51,49.81777654
KB52_339,KB52,"Hine, R., Williams, I.S., Chappell, B.W. & White, A.J.R. 1978. Contrasts between i- and s-type granitoids of the kosciusko batholith. Journal of the Geological Society of Australia, 25, 219–234, https://doi.org/10.1080/00167617808729029.",Natural s-type granite,-1,-1,-1,-1,-1,-1,-1,-1,-1,69.09,0.7,15.09,4.43,2.19,2.64,2.19,3.69,2,20,47,0.5,Natural,Natural,Natural,Natural,Natural,Nat,1.149901406,0.070594679,0.054279227,0.295977616,0.078353542,0.047033162,0.008704009,0.061612628,6.61,1.5,1.51,46.83610165
KB19_340,KB19,"Hine, R., Williams, I.S., Chappell, B.W. & White, A.J.R. 1978. Contrasts between i- and s-type granitoids of the kosciusko batholith. Journal of the Geological Society of Australia, 25, 219–234, https://doi.org/10.1080/00167617808729029.",Natural s-type granite,-1,-1,-1,-1,-1,-1,-1,-1,-1,69.43,0.72,14.98,4.69,2.19,2.72,2.13,3.14,2,20,47,0.5,Natural,Natural,Natural,Natural,Natural,Nat,1.155581556,0.068882977,0.054236277,0.293910938,0.066675034,0.048497654,0.008994952,0.065281244,6.88,1.42,1.6,45.37935231
KB32_341,KB32,"Hine, R., Williams, I.S., Chappell, B.W. & White, A.J.R. 1978. Contrasts between i- and s-type granitoids of the kosciusko batholith. Journal of the Geological Society of Australia, 25, 219–234, https://doi.org/10.1080/00167617808729029.",Natural s-type granite,-1,-1,-1,-1,-1,-1,-1,-1,-1,69.35,0.66,15.06,4.69,2.27,2.32,1.97,3.69,2,20,47,0.5,Natural,Natural,Natural,Natural,Natural,Nat,1.154269732,0.063483953,0.056438751,0.295457069,0.078317439,0.041294998,0.008210979,0.065235281,6.96,1.54,1.61,46.38520658
KB19_342,KB19,"Hine, R., Williams, I.S., Chappell, B.W. & White, A.J.R. 1978. Contrasts between i- and s-type granitoids of the kosciusko batholith. Journal of the Geological Society of Australia, 25, 219–234, https://doi.org/10.1080/00167617808729029.",Natural s-type granite,-1,-1,-1,-1,-1,-1,-1,-1,-1,69.43,0.72,14.98,4.69,2.19,2.72,2.13,3.14,2,20,47,0.5,Natural,Natural,Natural,Natural,Natural,Nat,1.155581556,0.068882977,0.054236277,0.293910938,0.066675034,0.048497654,0.008994952,0.065281244,6.88,1.42,1.6,45.37935231
KB32_343,KB32,"Hine, R., Williams, I.S., Chappell, B.W. & White, A.J.R. 1978. Contrasts between i- and s-type granitoids of the kosciusko batholith. Journal of the Geological Society of Australia, 25, 219–234, https://doi.org/10.1080/00167617808729029.",Natural s-type granite,-1,-1,-1,-1,-1,-1,-1,-1,-1,69.35,0.66,15.06,4.69,2.27,2.32,1.97,3.69,2,20,47,0.5,Natural,Natural,Natural,Natural,Natural,Nat,1.154269732,0.063483953,0.056438751,0.295457069,0.078317439,0.041294998,0.008210979,0.065235281,6.96,1.54,1.61,46.38520658
KB33_344,KB33,"Hine, R., Williams, I.S., Chappell, B.W. & White, A.J.R. 1978. Contrasts between i- and s-type granitoids of the kosciusko batholith. Journal of the Geological Society of Australia, 25, 219–234, https://doi.org/10.1080/00167617808729029.",Natural s-type granite,-1,-1,-1,-1,-1,-1,-1,-1,-1,67.65,0.69,15.28,5.26,2.63,2.94,2.04,3.52,2,20,47,0.5,Natural,Natural,Natural,Natural,Natural,Nat,1.125918582,0.065865962,0.065149279,0.299784068,0.074695652,0.052494782,0.008604685,0.073154446,7.88,1.25,1.55,47.10594672
KB33_345,KB33,"Hine, R., Williams, I.S., Chappell, B.W. & White, A.J.R. 1978. Contrasts between i- and s-type granitoids of the kosciusko batholith. Journal of the Geological Society of Australia, 25, 219–234, https://doi.org/10.1080/00167617808729029.",Natural s-type granite,-1,-1,-1,-1,-1,-1,-1,-1,-1,67.65,0.69,15.28,5.26,2.63,2.94,2.04,3.52,2,20,47,0.5,Natural,Natural,Natural,Natural,Natural,Nat,1.125918582,0.065865962,0.065149279,0.299784068,0.074695652,0.052494782,0.008604685,0.073154446,7.88,1.25,1.55,47.10594672
B21_346,B21,"Maas, R., Nicholls, I.A. & Legg, C. 1997. Igneous and metamorphic enclaves in the S-type Deddick Granodiorite, Lachlan fold Belt, SE Australia: Petrographic, geochemical and Nd-Sr isotopic evidence for crustal melting and magma mixing. Journal of Petrology, 38, 815–841, https://doi.org/10.1093/petroj/38.7.815.",Natural s-type granite,-1,-1,-1,-1,-1,-1,-1,-1,-1,69.35,0.62,14.89,4.65,2.05,2.2,2.12,4.11,2,20,47,0.5,Natural,Natural,Natural,Natural,Natural,Nat,1.154347934,0.068492525,0.050924042,0.292033453,0.087365986,0.039278625,0.00777233,0.064661972,6.7,1.74,1.5,44.05726987
F7_347,F7,"Maas, R., Nicholls, I.A. & Legg, C. 1997. Igneous and metamorphic enclaves in the S-type Deddick Granodiorite, Lachlan fold Belt, SE Australia: Petrographic, geochemical and Nd-Sr isotopic evidence for crustal melting and magma mixing. Journal of Petrology, 38, 815–841, https://doi.org/10.1093/petroj/38.7.815.",Natural s-type granite,-1,-1,-1,-1,-1,-1,-1,-1,-1,68.85,0.68,14.93,5.04,2.25,2.41,2.04,3.79,2,20,47,0.5,Natural,Natural,Natural,Natural,Natural,Nat,1.145952877,0.065894707,0.055881052,0.292956746,0.080547639,0.043019334,0.008522784,0.070082888,7.29,1.53,1.55,44.3627371
L1_348,L1,"Maas, R., Nicholls, I.A. & Legg, C. 1997. Igneous and metamorphic enclaves in the S-type Deddick Granodiorite, Lachlan fold Belt, SE Australia: Petrographic, geochemical and Nd-Sr isotopic evidence for crustal melting and magma mixing. Journal of Petrology, 38, 815–841, https://doi.org/10.1093/petroj/38.7.815.",Natural s-type granite,-1,-1,-1,-1,-1,-1,-1,-1,-1,69.79,0.6,15.23,4.37,1.99,2.13,1.93,3.95,2,20,47,0.5,Natural,Natural,Natural,Natural,Natural,Nat,1.161598738,0.062322845,0.049408848,0.298757581,0.083922865,0.038009823,0.007517846,0.060868843,6.36,1.64,1.62,44.80402851
K3_349,K3,"Maas, R., Nicholls, I.A. & Legg, C. 1997. Igneous and metamorphic enclaves in the S-type Deddick Granodiorite, Lachlan fold Belt, SE Australia: Petrographic, geochemical and Nd-Sr isotopic evidence for crustal melting and magma mixing. Journal of Petrology, 38, 815–841, https://doi.org/10.1093/petroj/38.7.815.",Natural s-type granite,-1,-1,-1,-1,-1,-1,-1,-1,-1,67.64,0.7,15.69,5.11,2.29,2.94,2.09,3.52,2,20,47,0.5,Natural,Natural,Natural,Natural,Natural,Nat,1.125900721,0.06749626,0.056863108,0.307817851,0.074794443,0.052469513,0.008771698,0.071183276,7.41,1.29,1.58,44.40821092
M13_350,M13,"Maas, R., Nicholls, I.A. & Legg, C. 1997. Igneous and metamorphic enclaves in the S-type Deddick Granodiorite, Lachlan fold Belt, SE Australia: Petrographic, geochemical and Nd-Sr isotopic evidence for crustal melting and magma mixing. Journal of Petrology, 38, 815–841, https://doi.org/10.1093/petroj/38.7.815.",Natural s-type granite,-1,-1,-1,-1,-1,-1,-1,-1,-1,68.65,0.61,15.42,4.9,2.07,2.02,1.79,4.54,2,20,47,0.5,Natural,Natural,Natural,Natural,Natural,Nat,1.142600849,0.05778467,0.051379709,0.302396361,0.09642923,0.036036056,0.00764085,0.068230622,6.97,1.6,1.59,42.95591237
B11_351,B11,"Maas, R., Nicholls, I.A. & Legg, C. 1997. Igneous and metamorphic enclaves in the S-type Deddick Granodiorite, Lachlan fold Belt, SE Australia: Petrographic, geochemical and Nd-Sr isotopic evidence for crustal melting and magma mixing. Journal of Petrology, 38, 815–841, https://doi.org/10.1093/petroj/38.7.815.",Natural s-type granite,-1,-1,-1,-1,-1,-1,-1,-1,-1,67.33,0.72,16.5,5.22,2.18,1.75,1.9,4.38,2,20,47,0.5,Natural,Natural,Natural,Natural,Natural,Nat,1.120685024,0.06140998,0.054103094,0.32371758,0.093015053,0.03128508,0.009059679,0.072706291,7.4,1.96,1.74,42.66489728
B21B_352,B21B,"Maas, R., Nicholls, I.A. & Legg, C. 1997. Igneous and metamorphic enclaves in the S-type Deddick Granodiorite, Lachlan fold Belt, SE Australia: Petrographic, geochemical and Nd-Sr isotopic evidence for crustal melting and magma mixing. Journal of Petrology, 38, 815–841, https://doi.org/10.1093/petroj/38.7.815.",Natural s-type granite,-1,-1,-1,-1,-1,-1,-1,-1,-1,67.38,0.72,15.99,5.53,2.57,2.9,2.18,2.72,2,20,47,0.5,Natural,Natural,Natural,Natural,Natural,Nat,1.121464562,0.070438045,0.063847752,0.31366787,0.057824641,0.051781554,0.009026835,0.076933152,8.1,1.36,1.74,45.35256598
B22_353,B22,"Maas, R., Nicholls, I.A. & Legg, C. 1997. Igneous and metamorphic enclaves in the S-type Deddick Granodiorite, Lachlan fold Belt, SE Australia: Petrographic, geochemical and Nd-Sr isotopic evidence for crustal melting and magma mixing. Journal of Petrology, 38, 815–841, https://doi.org/10.1093/petroj/38.7.815.",Natural s-type granite,-1,-1,-1,-1,-1,-1,-1,-1,-1,67.12,0.94,16.09,4.89,1.78,3.62,2.73,2.82,2,20,47,0.5,Natural,Natural,Natural,Natural,Natural,Nat,1.117197525,0.088009375,0.044283478,0.315681685,0.059821816,0.064549594,0.011801579,0.068108842,6.68,1.36,1.49,39.40080413
M1_354,M1,"Maas, R., Nicholls, I.A. & Legg, C. 1997. Igneous and metamorphic enclaves in the S-type Deddick Granodiorite, Lachlan fold Belt, SE Australia: Petrographic, geochemical and Nd-Sr isotopic evidence for crustal melting and magma mixing. Journal of Petrology, 38, 815–841, https://doi.org/10.1093/petroj/38.7.815.",Natural s-type granite,-1,-1,-1,-1,-1,-1,-1,-1,-1,69.36,0.98,15.2,4.61,1.48,3.24,2.43,2.7,2,20,47,0.5,Natural,Natural,Natural,Natural,Natural,Nat,1.154520333,0.07838892,0.036611569,0.298112033,0.057330382,0.057818672,0.012317359,0.064132127,6.08,1.36,1.54,36.34129999
K2_355,K2,"Maas, R., Nicholls, I.A. & Legg, C. 1997. Igneous and metamorphic enclaves in the S-type Deddick Granodiorite, Lachlan fold Belt, SE Australia: Petrographic, geochemical and Nd-Sr isotopic evidence for crustal melting and magma mixing. Journal of Petrology, 38, 815–841, https://doi.org/10.1093/petroj/38.7.815.",Natural s-type granite,-1,-1,-1,-1,-1,-1,-1,-1,-1,67.8,1.04,15.22,5.73,1.55,3.21,2.15,3.29,2,20,47,0.5,Natural,Natural,Natural,Natural,Natural,Nat,1.128453033,0.069427004,0.038484279,0.298561288,0.06990031,0.057282409,0.013030933,0.079812007,7.29,1.21,1.52,32.53211082
F12_356,F12,"Maas, R., Nicholls, I.A. & Legg, C. 1997. Igneous and metamorphic enclaves in the S-type Deddick Granodiorite, Lachlan fold Belt, SE Australia: Petrographic, geochemical and Nd-Sr isotopic evidence for crustal melting and magma mixing. Journal of Petrology, 38, 815–841, https://doi.org/10.1093/petroj/38.7.815.",Natural s-type granite,-1,-1,-1,-1,-1,-1,-1,-1,-1,70.25,0.98,14.43,4.59,1,3.41,2.12,3.21,2,20,47,0.5,Natural,Natural,Natural,Natural,Natural,Nat,1.169246799,0.068506243,0.024845971,0.283056145,0.068248414,0.060894062,0.012287756,0.063838609,5.59,1.13,1.43,28.01611205
M8_357,M8,"Maas, R., Nicholls, I.A. & Legg, C. 1997. Igneous and metamorphic enclaves in the S-type Deddick Granodiorite, Lachlan fold Belt, SE Australia: Petrographic, geochemical and Nd-Sr isotopic evidence for crustal melting and magma mixing. Journal of Petrology, 38, 815–841, https://doi.org/10.1093/petroj/38.7.815.",Natural s-type granite,-1,-1,-1,-1,-1,-1,-1,-1,-1,67.5,1.16,15.28,5.41,1.53,2.47,2.34,4.3,2,20,47,0.5,Natural,Natural,Natural,Natural,Natural,Nat,1.123531186,0.075668424,0.038041002,0.299766426,0.091274479,0.043960256,0.014554894,0.075321027,6.94,1.72,1.42,33.55709345
B15_358,B15,"Maas, R., Nicholls, I.A. & Legg, C. 1997. Igneous and metamorphic enclaves in the S-type Deddick Granodiorite, Lachlan fold Belt, SE Australia: Petrographic, geochemical and Nd-Sr isotopic evidence for crustal melting and magma mixing. Journal of Petrology, 38, 815–841, https://doi.org/10.1093/petroj/38.7.815.",Natural s-type granite,-1,-1,-1,-1,-1,-1,-1,-1,-1,67.96,0.98,15.44,5.05,1.49,2.71,2.04,4.33,2,20,47,0.5,Natural,Natural,Natural,Natural,Natural,Nat,1.131083961,0.065940912,0.037031622,0.302790145,0.091875934,0.048408358,0.012291449,0.070271457,6.54,1.36,1.47,34.51123892
8499B_359,8499B,"Maas, R., Nicholls, I.A. & Legg, C. 1997. Igneous and metamorphic enclaves in the S-type Deddick Granodiorite, Lachlan fold Belt, SE Australia: Petrographic, geochemical and Nd-Sr isotopic evidence for crustal melting and magma mixing. Journal of Petrology, 38, 815–841, https://doi.org/10.1093/petroj/38.7.815.",Natural s-type granite,-1,-1,-1,-1,-1,-1,-1,-1,-1,65.07,0.49,14.37,7.23,4.88,4.15,2.12,1.68,2,20,47,0.5,Natural,Natural,Natural,Natural,Natural,Nat,1.083124477,0.068519966,0.121024119,0.281934029,0.035725951,0.073944844,0.006145109,0.100656569,12.11,0.93,1.58,54.59389366
D1_360,D1,"Maas, R., Nicholls, I.A. & Legg, C. 1997. Igneous and metamorphic enclaves in the S-type Deddick Granodiorite, Lachlan fold Belt, SE Australia: Petrographic, geochemical and Nd-Sr isotopic evidence for crustal melting and magma mixing. Journal of Petrology, 38, 815–841, https://doi.org/10.1093/petroj/38.7.815.",Natural s-type granite,-1,-1,-1,-1,-1,-1,-1,-1,-1,64.67,0.63,14.63,7,5.61,3.86,1.9,1.7,2,20,47,0.5,Natural,Natural,Natural,Natural,Natural,Nat,1.076465984,0.061390957,0.139123507,0.286956017,0.036140401,0.068744477,0.007898481,0.097420784,12.61,0.89,1.73,58.81499242
60450a_361,60450a,"Maas, R., Nicholls, I.A. & Legg, C. 1997. Igneous and metamorphic enclaves in the S-type Deddick Granodiorite, Lachlan fold Belt, SE Australia: Petrographic, geochemical and Nd-Sr isotopic evidence for crustal melting and magma mixing. Journal of Petrology, 38, 815–841, https://doi.org/10.1093/petroj/38.7.815.",Natural s-type granite,-1,-1,-1,-1,-1,-1,-1,-1,-1,62.3,0.55,15.71,7.28,4.98,6.31,1.71,1.16,2,20,47,0.5,Natural,Natural,Natural,Natural,Natural,Nat,1.036967232,0.055251861,0.123472112,0.308168371,0.024660509,0.112490962,0.006895499,0.101323191,12.26,0.49,1.6,54.92646457
60540c_362,60540c,"Maas, R., Nicholls, I.A. & Legg, C. 1997. Igneous and metamorphic enclaves in the S-type Deddick Granodiorite, Lachlan fold Belt, SE Australia: Petrographic, geochemical and Nd-Sr isotopic evidence for crustal melting and magma mixing. Journal of Petrology, 38, 815–841, https://doi.org/10.1093/petroj/38.7.815.",Natural s-type granite,-1,-1,-1,-1,-1,-1,-1,-1,-1,61.94,0.5,15.87,8.94,4.03,5.69,1.74,1.29,2,20,47,0.5,Natural,Natural,Natural,Natural,Natural,Nat,1.0309836,0.056249353,0.099920829,0.311270369,0.027437923,0.101471224,0.006271776,0.124381785,12.96,0.55,1.68,44.54733144
A6_363,A6,"Maas, R., Nicholls, I.A. & Legg, C. 1997. Igneous and metamorphic enclaves in the S-type Deddick Granodiorite, Lachlan fold Belt, SE Australia: Petrographic, geochemical and Nd-Sr isotopic evidence for crustal melting and magma mixing. Journal of Petrology, 38, 815–841, https://doi.org/10.1093/petroj/38.7.815.",Natural s-type granite,-1,-1,-1,-1,-1,-1,-1,-1,-1,61.92,0.64,16.69,7.03,4.36,5.41,1.21,2.74,2,20,47,0.5,Natural,Natural,Natural,Natural,Natural,Nat,1.03054687,0.039112011,0.108112454,0.327351319,0.058273162,0.096459458,0.008027068,0.097878101,11.39,0.41,1.69,52.48418005
A4A_364,A4A,"Maas, R., Nicholls, I.A. & Legg, C. 1997. Igneous and metamorphic enclaves in the S-type Deddick Granodiorite, Lachlan fold Belt, SE Australia: Petrographic, geochemical and Nd-Sr isotopic evidence for crustal melting and magma mixing. Journal of Petrology, 38, 815–841, https://doi.org/10.1093/petroj/38.7.815.",Natural s-type granite,-1,-1,-1,-1,-1,-1,-1,-1,-1,56.54,1.19,17.53,8.76,5.98,7.97,0.53,1.49,2,20,47,0.5,Natural,Natural,Natural,Natural,Natural,Nat,0.941006752,0.017143729,0.148479136,0.343901079,0.031710926,0.142109404,0.014935803,0.121945138,14.75,0.12,1.8,54.90599414
Z4B_365,Z4B,"Maas, R., Nicholls, I.A. & Legg, C. 1997. Igneous and metamorphic enclaves in the S-type Deddick Granodiorite, Lachlan fold Belt, SE Australia: Petrographic, geochemical and Nd-Sr isotopic evidence for crustal melting and magma mixing. Journal of Petrology, 38, 815–841, https://doi.org/10.1093/petroj/38.7.815.",Natural s-type granite,-1,-1,-1,-1,-1,-1,-1,-1,-1,62.47,0.94,16.62,7.21,3.65,5.53,1.95,1.64,2,20,47,0.5,Natural,Natural,Natural,Natural,Natural,Nat,1.039801242,0.062905728,0.090533672,0.325912426,0.03480909,0.098584127,0.011766184,0.10032623,10.86,0.64,1.66,47.4346215
J2_366,J2,"Maas, R., Nicholls, I.A. & Legg, C. 1997. Igneous and metamorphic enclaves in the S-type Deddick Granodiorite, Lachlan fold Belt, SE Australia: Petrographic, geochemical and Nd-Sr isotopic evidence for crustal melting and magma mixing. Journal of Petrology, 38, 815–841, https://doi.org/10.1093/petroj/38.7.815.",Natural s-type granite,-1,-1,-1,-1,-1,-1,-1,-1,-1,58.41,1.77,18.11,9.1,2.95,5.58,2.05,2.05,2,20,47,0.5,Natural,Natural,Natural,Natural,Natural,Nat,0.972124095,0.066026893,0.073164383,0.355322539,0.043442429,0.099447018,0.022103221,0.126625632,12.05,0.66,1.7,36.62064036
A8952_367,A8952,"Castro, A., Patiño Douce, A.E., Corretgé, L.G., De La Rosa, J.D., El-Biad, M. & El-Hmidi, H.H. 1999. Origin of peraluminous granites and granodiorites, Iberian massif, Spain: An experimental test of granite petrogenesis. Contributions to Mineralogy and Petrology, 135, 255–276, https://doi.org/10.1007/s004100050511.",Natural s-type granite,-1,-1,-1,-1,-1,-1,-1,-1,-1,66.57,0.68,17.1,3.94,1.86,3.55,3.73,2.56,2,20,47,0.5,Natural,Natural,Natural,Natural,Natural,Nat,1.108090504,0.120303714,0.046249893,0.335512296,0.054363937,0.063377252,0.008463964,0.054823329,5.8,1.9,1.41,45.75879914
A8956_368,A8956,"Castro, A., Patiño Douce, A.E., Corretgé, L.G., De La Rosa, J.D., El-Biad, M. & El-Hmidi, H.H. 1999. Origin of peraluminous granites and granodiorites, Iberian massif, Spain: An experimental test of granite petrogenesis. Contributions to Mineralogy and Petrology, 135, 255–276, https://doi.org/10.1007/s004100050511.",Natural s-type granite,-1,-1,-1,-1,-1,-1,-1,-1,-1,73.23,0.24,14.95,2.17,0.79,1.83,3.85,2.92,2,20,47,0.5,Natural,Natural,Natural,Natural,Natural,Nat,1.218899138,0.124391372,0.019683727,0.293280171,0.061976377,0.032647493,0.00305643,0.03027357,2.97,3.81,1.34,39.40110523
GC29069606_369,GC29069606,"Castro, A., Patiño Douce, A.E., Corretgé, L.G., De La Rosa, J.D., El-Biad, M. & El-Hmidi, H.H. 1999. Origin of peraluminous granites and granodiorites, Iberian massif, Spain: An experimental test of granite petrogenesis. Contributions to Mineralogy and Petrology, 135, 255–276, https://doi.org/10.1007/s004100050511.",Natural s-type granite,-1,-1,-1,-1,-1,-1,-1,-1,-1,68.98,0.52,16.38,3.31,1.53,2.81,3.86,2.61,2,20,47,0.5,Natural,Natural,Natural,Natural,Natural,Nat,1.14817506,0.124432378,0.0378658,0.321317504,0.055516305,0.050075991,0.006497056,0.046110755,4.84,2.48,1.4,45.09091872
A8954_370,A8954,"Castro, A., Patiño Douce, A.E., Corretgé, L.G., De La Rosa, J.D., El-Biad, M. & El-Hmidi, H.H. 1999. Origin of peraluminous granites and granodiorites, Iberian massif, Spain: An experimental test of granite petrogenesis. Contributions to Mineralogy and Petrology, 135, 255–276, https://doi.org/10.1007/s004100050511.",Natural s-type granite,-1,-1,-1,-1,-1,-1,-1,-1,-1,73.96,0.2,14.83,1.61,0.73,0.67,3.69,4.31,2,20,47,0.5,Natural,Natural,Natural,Natural,Natural,Nat,1.230995093,0.119000104,0.018148256,0.290942986,0.091453392,0.011956689,0.002544034,0.022398531,2.34,9.95,1.31,44.75880187
GC30069610_371,GC30069610,"Castro, A., Patiño Douce, A.E., Corretgé, L.G., De La Rosa, J.D., El-Biad, M. & El-Hmidi, H.H. 1999. Origin of peraluminous granites and granodiorites, Iberian massif, Spain: An experimental test of granite petrogenesis. Contributions to Mineralogy and Petrology, 135, 255–276, https://doi.org/10.1007/s004100050511.",Natural s-type granite,-1,-1,-1,-1,-1,-1,-1,-1,-1,72.71,0.26,15.31,1.79,0.42,0.96,3.83,4.71,2,20,47,0.5,Natural,Natural,Natural,Natural,Natural,Nat,1.210245727,0.1236978,0.010316104,0.300373381,0.09990366,0.017179877,0.003301382,0.024967356,2.21,7.2,1.25,29.23779079
A8958_372,A8958,"Castro, A., Patiño Douce, A.E., Corretgé, L.G., De La Rosa, J.D., El-Biad, M. & El-Hmidi, H.H. 1999. Origin of peraluminous granites and granodiorites, Iberian massif, Spain: An experimental test of granite petrogenesis. Contributions to Mineralogy and Petrology, 135, 255–276, https://doi.org/10.1007/s004100050511.",Natural s-type granite,-1,-1,-1,-1,-1,-1,-1,-1,-1,73.21,0.3,14.99,2,0.5,1.03,3.59,4.38,2,20,47,0.5,Natural,Natural,Natural,Natural,Natural,Nat,1.218490128,0.115991949,0.012309978,0.293951395,0.093085199,0.018417299,0.003803408,0.027781381,2.49,6.3,1.29,30.70481534
GC28069601_373,GC28069601,"Castro, A., Patiño Douce, A.E., Corretgé, L.G., De La Rosa, J.D., El-Biad, M. & El-Hmidi, H.H. 1999. Origin of peraluminous granites and granodiorites, Iberian massif, Spain: An experimental test of granite petrogenesis. Contributions to Mineralogy and Petrology, 135, 255–276, https://doi.org/10.1007/s004100050511.",Natural s-type granite,-1,-1,-1,-1,-1,-1,-1,-1,-1,74.12,0.28,14.58,1.87,0.46,0.84,3.33,4.52,2,20,47,0.5,Natural,Natural,Natural,Natural,Natural,Nat,1.233698029,0.107500247,0.011305448,0.28601603,0.095883011,0.014987111,0.003549963,0.026045888,2.33,7.17,1.31,30.26785357
GC28069602_374,GC28069602,"Castro, A., Patiño Douce, A.E., Corretgé, L.G., De La Rosa, J.D., El-Biad, M. & El-Hmidi, H.H. 1999. Origin of peraluminous granites and granodiorites, Iberian massif, Spain: An experimental test of granite petrogenesis. Contributions to Mineralogy and Petrology, 135, 255–276, https://doi.org/10.1007/s004100050511.",Natural s-type granite,-1,-1,-1,-1,-1,-1,-1,-1,-1,71.41,0.45,15.28,2.42,0.75,0.86,3.58,5.26,2,20,47,0.5,Natural,Natural,Natural,Natural,Natural,Nat,1.188576116,0.115380355,0.018703297,0.299730082,0.111600901,0.015259149,0.005612155,0.033689521,3.17,7.56,1.24,35.69820736
GC28069603_375,GC28069603,"Castro, A., Patiño Douce, A.E., Corretgé, L.G., De La Rosa, J.D., El-Biad, M. & El-Hmidi, H.H. 1999. Origin of peraluminous granites and granodiorites, Iberian massif, Spain: An experimental test of granite petrogenesis. Contributions to Mineralogy and Petrology, 135, 255–276, https://doi.org/10.1007/s004100050511.",Natural s-type granite,-1,-1,-1,-1,-1,-1,-1,-1,-1,72.18,0.44,14.7,2.43,0.58,1.24,3.54,4.89,2,20,47,0.5,Natural,Natural,Natural,Natural,Natural,Nat,1.201333997,0.114311416,0.014437655,0.288361276,0.103821879,0.022027833,0.005496431,0.033887204,3.02,5.19,1.2,29.87624925
A8955_376,A8955,"Castro, A., Patiño Douce, A.E., Corretgé, L.G., De La Rosa, J.D., El-Biad, M. & El-Hmidi, H.H. 1999. Origin of peraluminous granites and granodiorites, Iberian massif, Spain: An experimental test of granite petrogenesis. Contributions to Mineralogy and Petrology, 135, 255–276, https://doi.org/10.1007/s004100050511.",Natural s-type granite,-1,-1,-1,-1,-1,-1,-1,-1,-1,74.51,0.09,15.12,1.09,0.21,0.49,3.95,4.54,2,20,47,0.5,Natural,Natural,Natural,Natural,Natural,Nat,1.240137802,0.127420488,0.005288964,0.296681351,0.096336403,0.008688748,0.00114389,0.01516896,1.3,14.67,1.28,25.85288849
A8957_377,A8957,"Castro, A., Patiño Douce, A.E., Corretgé, L.G., De La Rosa, J.D., El-Biad, M. & El-Hmidi, H.H. 1999. Origin of peraluminous granites and granodiorites, Iberian massif, Spain: An experimental test of granite petrogenesis. Contributions to Mineralogy and Petrology, 135, 255–276, https://doi.org/10.1007/s004100050511.",Natural s-type granite,-1,-1,-1,-1,-1,-1,-1,-1,-1,75.06,0.09,14.97,0.97,0.14,0.51,4.15,4.11,2,20,47,0.5,Natural,Natural,Natural,Natural,Natural,Nat,1.249305163,0.133755371,0.003537582,0.293662488,0.087355736,0.00908057,0.001147656,0.01347246,1.11,14.73,1.28,20.79702245
Ma8915bb_378,Ma8915bb,"Sandeman, H.A. & Clark, A.H. 2003. Glass-rich, Cordierite–Biotite Rhyodacite, Valle Ninahuisa, Puno, SE Peru: Petrological Evidence for Hybridization of ‘Lachlan S-type’ and Potassic Mafic Magmas. Journal of Petrology, 44, 355–385, https://doi.org/10.1093/petrology/44.2.355.",Natural s-type granite,-1,-1,-1,-1,-1,-1,-1,-1,-1,70.63,0.33,15.86,2.18,1.13,1.9,3.22,4.74,2,20,47,0.5,Natural,Natural,Natural,Natural,Natural,Nat,1.175562102,0.103855529,0.028000407,0.311146553,0.100722849,0.033913809,0.004186789,0.030382269,3.31,3.06,1.3,47.96013005
Ma8915a_379,Ma8915a,"Sandeman, H.A. & Clark, A.H. 2003. Glass-rich, Cordierite–Biotite Rhyodacite, Valle Ninahuisa, Puno, SE Peru: Petrological Evidence for Hybridization of ‘Lachlan S-type’ and Potassic Mafic Magmas. Journal of Petrology, 44, 355–385, https://doi.org/10.1093/petrology/44.2.355.",Natural s-type granite,-1,-1,-1,-1,-1,-1,-1,-1,-1,71.53,0.36,15.6,2.06,1.12,1.68,2.79,4.85,2,20,47,0.5,Natural,Natural,Natural,Natural,Natural,Nat,1.190630185,0.090143863,0.027777033,0.305980335,0.103000542,0.030041267,0.004539061,0.028625014,3.18,3,1.37,49.24827099
MAC2_380,MAC2,"Sandeman, H.A. & Clark, A.H. 2003. Glass-rich, Cordierite–Biotite Rhyodacite, Valle Ninahuisa, Puno, SE Peru: Petrological Evidence for Hybridization of ‘Lachlan S-type’ and Potassic Mafic Magmas. Journal of Petrology, 44, 355–385, https://doi.org/10.1093/petrology/44.2.355.",Natural s-type granite,-1,-1,-1,-1,-1,-1,-1,-1,-1,71.23,0.38,16.07,1.77,1.18,1.7,3.15,4.52,2,20,47,0.5,Natural,Natural,Natural,Natural,Natural,Nat,1.185537475,0.101700391,0.029193158,0.315287764,0.095909818,0.03034888,0.004735394,0.024690284,2.95,3.35,1.38,54.17834719
MAC2a_381,MAC2a,"Sandeman, H.A. & Clark, A.H. 2003. Glass-rich, Cordierite–Biotite Rhyodacite, Valle Ninahuisa, Puno, SE Peru: Petrological Evidence for Hybridization of ‘Lachlan S-type’ and Potassic Mafic Magmas. Journal of Petrology, 44, 355–385, https://doi.org/10.1093/petrology/44.2.355.",Natural s-type granite,-1,-1,-1,-1,-1,-1,-1,-1,-1,70.78,0.39,16.02,1.94,1.27,1.66,3.05,4.9,2,20,47,0.5,Natural,Natural,Natural,Natural,Natural,Nat,1.178023166,0.098314121,0.031431852,0.314216263,0.104030816,0.029685633,0.004850392,0.027005076,3.21,3.31,1.35,53.78765239
MAC116_382,MAC116,"Sandeman, H.A. & Clark, A.H. 2003. Glass-rich, Cordierite–Biotite Rhyodacite, Valle Ninahuisa, Puno, SE Peru: Petrological Evidence for Hybridization of ‘Lachlan S-type’ and Potassic Mafic Magmas. Journal of Petrology, 44, 355–385, https://doi.org/10.1093/petrology/44.2.355.",Natural s-type granite,-1,-1,-1,-1,-1,-1,-1,-1,-1,70.94,0.4,16.15,1.8,1.15,1.77,3.09,4.69,2,20,47,0.5,Natural,Natural,Natural,Natural,Natural,Nat,1.180768201,0.099811084,0.028549555,0.316823144,0.099514729,0.031626178,0.005022812,0.025085294,2.95,3.16,1.37,53.22948657
MAC137_383,MAC137,"Sandeman, H.A. & Clark, A.H. 2003. Glass-rich, Cordierite–Biotite Rhyodacite, Valle Ninahuisa, Puno, SE Peru: Petrological Evidence for Hybridization of ‘Lachlan S-type’ and Potassic Mafic Magmas. Journal of Petrology, 44, 355–385, https://doi.org/10.1093/petrology/44.2.355.",Natural s-type granite,-1,-1,-1,-1,-1,-1,-1,-1,-1,70.14,0.41,16.16,2.15,1.49,1.82,3.34,4.49,2,20,47,0.5,Natural,Natural,Natural,Natural,Natural,Nat,1.167367737,0.107644207,0.037013399,0.317010545,0.095239242,0.03251425,0.005188562,0.029957079,3.64,3.31,1.35,55.26823173
MAC175_384,MAC175,"Sandeman, H.A. & Clark, A.H. 2003. Glass-rich, Cordierite–Biotite Rhyodacite, Valle Ninahuisa, Puno, SE Peru: Petrological Evidence for Hybridization of ‘Lachlan S-type’ and Potassic Mafic Magmas. Journal of Petrology, 44, 355–385, https://doi.org/10.1093/petrology/44.2.355.",Natural s-type granite,-1,-1,-1,-1,-1,-1,-1,-1,-1,70.03,0.39,16.28,2.25,1.43,1.8,3.32,4.51,2,20,47,0.5,Natural,Natural,Natural,Natural,Natural,Nat,1.165580631,0.107093398,0.035474627,0.319355568,0.095722177,0.032010341,0.004834922,0.031358228,3.68,3.35,1.36,53.07962202
Ma8915a_385,Ma8915a,"Sandeman, H.A. & Clark, A.H. 2003. Glass-rich, Cordierite–Biotite Rhyodacite, Valle Ninahuisa, Puno, SE Peru: Petrological Evidence for Hybridization of ‘Lachlan S-type’ and Potassic Mafic Magmas. Journal of Petrology, 44, 355–385, https://doi.org/10.1093/petrology/44.2.355.",Natural s-type granite,-1,-1,-1,-1,-1,-1,-1,-1,-1,76.72,0.13,13.81,0.8,0.17,0.65,2.26,5.46,2,20,47,0.5,Natural,Natural,Natural,Natural,Natural,Nat,1.276885251,0.072992757,0.004255778,0.270849161,0.115853281,0.011661473,0.00161076,0.011191343,0.98,6.26,1.35,27.55062274
Ma8915c_386,Ma8915c,"Sandeman, H.A. & Clark, A.H. 2003. Glass-rich, Cordierite–Biotite Rhyodacite, Valle Ninahuisa, Puno, SE Peru: Petrological Evidence for Hybridization of ‘Lachlan S-type’ and Potassic Mafic Magmas. Journal of Petrology, 44, 355–385, https://doi.org/10.1093/petrology/44.2.355.",Natural s-type granite,-1,-1,-1,-1,-1,-1,-1,-1,-1,77.26,0.12,13.44,0.72,0.25,0.6,2.08,5.53,2,20,47,0.5,Natural,Natural,Natural,Natural,Natural,Nat,1.285947946,0.067205815,0.006295258,0.263572742,0.117391204,0.010745874,0.001456081,0.010006292,0.97,6.25,1.35,38.61754313
MAC2_387,MAC2,"Sandeman, H.A. & Clark, A.H. 2003. Glass-rich, Cordierite–Biotite Rhyodacite, Valle Ninahuisa, Puno, SE Peru: Petrological Evidence for Hybridization of ‘Lachlan S-type’ and Potassic Mafic Magmas. Journal of Petrology, 44, 355–385, https://doi.org/10.1093/petrology/44.2.355.",Natural s-type granite,-1,-1,-1,-1,-1,-1,-1,-1,-1,76.8,0.12,13.77,0.61,0.11,0.63,2.49,5.49,2,20,47,0.5,Natural,Natural,Natural,Natural,Natural,Nat,1.278345106,0.080201296,0.002635283,0.270013107,0.116586781,0.011174904,0.001462886,0.008426826,0.71,7.18,1.3,23.82260732
MAC137_388,MAC137,"Sandeman, H.A. & Clark, A.H. 2003. Glass-rich, Cordierite–Biotite Rhyodacite, Valle Ninahuisa, Puno, SE Peru: Petrological Evidence for Hybridization of ‘Lachlan S-type’ and Potassic Mafic Magmas. Journal of Petrology, 44, 355–385, https://doi.org/10.1093/petrology/44.2.355.",Natural s-type granite,-1,-1,-1,-1,-1,-1,-1,-1,-1,77.03,0.15,13.34,0.89,0.26,0.6,2.6,5.13,2,20,47,0.5,Natural,Natural,Natural,Natural,Natural,Nat,1.28213437,0.084039302,0.006355732,0.261707966,0.109001112,0.010658766,0.001870996,0.012330888,1.14,7.88,1.28,34.01220612
cbs001_389,cbs001,"Scheepers, R. 1990. Magmatic Association and Radioelement Geochemistry of Selected Cape Granites with Special Reference to Subalkaline and Leucogranitic Phases. Stellenbosch University.",Natural s-type granite,-1,-1,-1,-1,-1,-1,-1,-1,-1,75.01,0.25,14.5,0,0.42,1.79,2.89,5.14,2,20,47,0.5,Natural,Natural,Natural,Natural,Natural,Nat,1.248421225,0.093345647,0.010472088,0.284520172,0.10906403,0.031942086,0.003093508,0,0.42,2.92,1.21,100
cbs002_390,cbs002,"Scheepers, R. 1990. Magmatic Association and Radioelement Geochemistry of Selected Cape Granites with Special Reference to Subalkaline and Leucogranitic Phases. Stellenbosch University.",Natural s-type granite,-1,-1,-1,-1,-1,-1,-1,-1,-1,74.77,0.23,14.63,0,0.44,1.77,3.06,5.09,2,20,47,0.5,Natural,Natural,Natural,Natural,Natural,Nat,1.244562073,0.098762372,0.01099424,0.287036896,0.108082468,0.031607474,0.002838638,0,0.44,3.12,1.2,100
4/2_391,04 Feb,"Scheepers, R. 1990. Magmatic Association and Radioelement Geochemistry of Selected Cape Granites with Special Reference to Subalkaline and Leucogranitic Phases. Stellenbosch University.",Natural s-type granite,-1,-1,-1,-1,-1,-1,-1,-1,-1,74.69,0.37,14.52,0,0.79,1.81,2.71,5.11,2,20,47,0.5,Natural,Natural,Natural,Natural,Natural,Nat,1.243149281,0.087476274,0.019585066,0.284820509,0.108494598,0.032227402,0.00468171,0,0.79,2.71,1.25,100
cbs003_392,cbs003,"Scheepers, R. 1990. Magmatic Association and Radioelement Geochemistry of Selected Cape Granites with Special Reference to Subalkaline and Leucogranitic Phases. Stellenbosch University.",Natural s-type granite,-1,-1,-1,-1,-1,-1,-1,-1,-1,75.15,0.39,14.45,0,0.84,1.54,2.57,5.08,2,20,47,0.5,Natural,Natural,Natural,Natural,Natural,Nat,1.250768955,0.08289662,0.020727809,0.283499385,0.10775346,0.027374445,0.004837886,0,0.84,3.03,1.3,100
4/1_393,04 Jan,"Scheepers, R. 1990. Magmatic Association and Radioelement Geochemistry of Selected Cape Granites with Special Reference to Subalkaline and Leucogranitic Phases. Stellenbosch University.",Natural s-type granite,-1,-1,-1,-1,-1,-1,-1,-1,-1,74.76,0.39,14.5,0,0.89,1.77,2.45,5.23,2,20,47,0.5,Natural,Natural,Natural,Natural,Natural,Nat,1.244319112,0.079039855,0.022145948,0.284409996,0.111060062,0.031648747,0.004938214,0,0.89,2.5,1.28,100
cbs004_394,cbs004,"Scheepers, R. 1990. Magmatic Association and Radioelement Geochemistry of Selected Cape Granites with Special Reference to Subalkaline and Leucogranitic Phases. Stellenbosch University.",Natural s-type granite,-1,-1,-1,-1,-1,-1,-1,-1,-1,74.84,0.37,14.66,0,0.9,1.66,2.44,5.12,2,20,47,0.5,Natural,Natural,Natural,Natural,Natural,Nat,1.245754811,0.078696667,0.02242996,0.287645033,0.108690242,0.029617727,0.004606686,0,0.9,2.66,1.33,100
11/2_395,11 Feb,"Scheepers, R. 1990. Magmatic Association and Radioelement Geochemistry of Selected Cape Granites with Special Reference to Subalkaline and Leucogranitic Phases. Stellenbosch University.",Natural s-type granite,-1,-1,-1,-1,-1,-1,-1,-1,-1,74.72,0.41,14.46,0,0.91,1.87,2.38,5.26,2,20,47,0.5,Natural,Natural,Natural,Natural,Natural,Nat,1.243658192,0.076910979,0.022466416,0.283575966,0.111593135,0.03340809,0.00508241,0,0.91,2.3,1.28,100
5/1_396,05 Jan,"Scheepers, R. 1990. Magmatic Association and Radioelement Geochemistry of Selected Cape Granites with Special Reference to Subalkaline and Leucogranitic Phases. Stellenbosch University.",Natural s-type granite,-1,-1,-1,-1,-1,-1,-1,-1,-1,74.8,0.4,14.5,0,0.92,1.84,2.41,5.14,2,20,47,0.5,Natural,Natural,Natural,Natural,Natural,Nat,1.244952529,0.077695903,0.022757812,0.284398685,0.109100389,0.032899226,0.004959318,0,0.92,2.36,1.29,100
4/7_397,04 Jul,"Scheepers, R. 1990. Magmatic Association and Radioelement Geochemistry of Selected Cape Granites with Special Reference to Subalkaline and Leucogranitic Phases. Stellenbosch University.",Natural s-type granite,-1,-1,-1,-1,-1,-1,-1,-1,-1,74.56,0.39,14.57,0,0.92,1.87,2.47,5.21,2,20,47,0.5,Natural,Natural,Natural,Natural,Natural,Nat,1.240983753,0.079817378,0.022949445,0.28581356,0.110548147,0.033359481,0.004944886,0,0.92,2.39,1.28,100
5/3_398,05 Mar,"Scheepers, R. 1990. Magmatic Association and Radioelement Geochemistry of Selected Cape Granites with Special Reference to Subalkaline and Leucogranitic Phases. Stellenbosch University.",Natural s-type granite,-1,-1,-1,-1,-1,-1,-1,-1,-1,74.66,0.39,14.55,0,0.94,1.86,2.42,5.18,2,20,47,0.5,Natural,Natural,Natural,Natural,Natural,Nat,1.242704224,0.077934769,0.023245959,0.285472815,0.110069211,0.033229406,0.004822777,0,0.94,2.35,1.29,100
11/1_399,11 Jan,"Scheepers, R. 1990. Magmatic Association and Radioelement Geochemistry of Selected Cape Granites with Special Reference to Subalkaline and Leucogranitic Phases. Stellenbosch University.",Natural s-type granite,-1,-1,-1,-1,-1,-1,-1,-1,-1,74.44,0.39,14.5,0,0.95,1.83,2.58,5.31,2,20,47,0.5,Natural,Natural,Natural,Natural,Natural,Nat,1.238958753,0.083200716,0.023664375,0.284333776,0.112821834,0.032708173,0.004855633,0,0.95,2.54,1.24,100
6/2_400,06 Feb,"Scheepers, R. 1990. Magmatic Association and Radioelement Geochemistry of Selected Cape Granites with Special Reference to Subalkaline and Leucogranitic Phases. Stellenbosch University.",Natural s-type granite,-1,-1,-1,-1,-1,-1,-1,-1,-1,74.78,0.39,14.47,0,0.96,1.71,2.49,5.2,2,20,47,0.5,Natural,Natural,Natural,Natural,Natural,Nat,1.244729135,0.080239735,0.02380768,0.283749286,0.110406902,0.030542657,0.004909172,0,0.96,2.63,1.28,100
4/3_401,04 Mar,"Scheepers, R. 1990. Magmatic Association and Radioelement Geochemistry of Selected Cape Granites with Special Reference to Subalkaline and Leucogranitic Phases. Stellenbosch University.",Natural s-type granite,-1,-1,-1,-1,-1,-1,-1,-1,-1,75.07,0.42,14.18,0,0.97,1.74,2.45,5.18,2,20,47,0.5,Natural,Natural,Natural,Natural,Natural,Nat,1.249460413,0.07917956,0.023990854,0.278182475,0.109931882,0.030963057,0.005207308,0,0.97,2.56,1.26,100
9/3_402,09 Mar,"Scheepers, R. 1990. Magmatic Association and Radioelement Geochemistry of Selected Cape Granites with Special Reference to Subalkaline and Leucogranitic Phases. Stellenbosch University.",Natural s-type granite,-1,-1,-1,-1,-1,-1,-1,-1,-1,74.95,0.39,14.5,0,0.97,1.79,2.42,4.99,2,20,47,0.5,Natural,Natural,Natural,Natural,Natural,Nat,1.247465754,0.078244293,0.024116225,0.284351461,0.105846452,0.031870368,0.004841931,0,0.97,2.46,1.32,100
6/1_403,06 Jan,"Scheepers, R. 1990. Magmatic Association and Radioelement Geochemistry of Selected Cape Granites with Special Reference to Subalkaline and Leucogranitic Phases. Stellenbosch University.",Natural s-type granite,-1,-1,-1,-1,-1,-1,-1,-1,-1,74.39,0.41,14.67,0,0.98,1.79,2.58,5.19,2,20,47,0.5,Natural,Natural,Natural,Natural,Natural,Nat,1.238163256,0.083248916,0.024261433,0.287713566,0.110209922,0.031906681,0.005079766,0,0.98,2.61,1.28,100
4/6_404,04 Jun,"Scheepers, R. 1990. Magmatic Association and Radioelement Geochemistry of Selected Cape Granites with Special Reference to Subalkaline and Leucogranitic Phases. Stellenbosch University.",Natural s-type granite,-1,-1,-1,-1,-1,-1,-1,-1,-1,74.89,0.43,14.28,0,0.98,1.84,2.47,5.12,2,20,47,0.5,Natural,Natural,Natural,Natural,Natural,Nat,1.246427578,0.079697364,0.024304414,0.280046724,0.108635144,0.032892369,0.005349728,0,0.98,2.42,1.27,100
257_405,257,"Scheepers, R. 1990. Magmatic Association and Radioelement Geochemistry of Selected Cape Granites with Special Reference to Subalkaline and Leucogranitic Phases. Stellenbosch University.",Natural s-type granite,-1,-1,-1,-1,-1,-1,-1,-1,-1,74.19,0.31,15,0.22,0.88,1.51,2.7,5.2,2,20,47,0.5,Natural,Natural,Natural,Natural,Natural,Nat,1.234829338,0.087060323,0.021800195,0.294212756,0.110392863,0.026912801,0.003882873,0.003021501,1.1,3.23,1.31,87.82717844
5/2_406,05 Feb,"Scheepers, R. 1990. Magmatic Association and Radioelement Geochemistry of Selected Cape Granites with Special Reference to Subalkaline and Leucogranitic Phases. Stellenbosch University.",Natural s-type granite,-1,-1,-1,-1,-1,-1,-1,-1,-1,74.8,0.41,14.56,0,1,1.74,2.37,5.13,2,20,47,0.5,Natural,Natural,Natural,Natural,Natural,Nat,1.244951118,0.076382365,0.024837059,0.285540016,0.108924503,0.03105346,0.005091949,0,1,2.46,1.32,100
4/5_407,04 May,"Scheepers, R. 1990. Magmatic Association and Radioelement Geochemistry of Selected Cape Granites with Special Reference to Subalkaline and Leucogranitic Phases. Stellenbosch University.",Natural s-type granite,-1,-1,-1,-1,-1,-1,-1,-1,-1,74.52,0.4,14.48,0,1,1.9,2.37,5.31,2,20,47,0.5,Natural,Natural,Natural,Natural,Natural,Nat,1.240415415,0.076606032,0.024909788,0.284119605,0.112796095,0.033941793,0.004975915,0,1,2.26,1.27,100
4/4_408,04 Apr,"Scheepers, R. 1990. Magmatic Association and Radioelement Geochemistry of Selected Cape Granites with Special Reference to Subalkaline and Leucogranitic Phases. Stellenbosch University.",Natural s-type granite,-1,-1,-1,-1,-1,-1,-1,-1,-1,75.44,0.48,13.92,0,1.21,1.68,2.14,5.14,2,20,47,0.5,Natural,Natural,Natural,Natural,Natural,Nat,1.255663308,0.069002948,0.029908663,0.273054834,0.109050283,0.02990775,0.006037366,0,1.21,2.31,1.31,100
252_409,252,"Scheepers, R. 1990. Magmatic Association and Radioelement Geochemistry of Selected Cape Granites with Special Reference to Subalkaline and Leucogranitic Phases. Stellenbosch University.",Natural s-type granite,-1,-1,-1,-1,-1,-1,-1,-1,-1,75.91,0.23,14.74,1.8,0.38,1.44,0.03,5.47,2,20,47,0.5,Natural,Natural,Natural,Natural,Natural,Nat,1.263560218,0.001011991,0.009337265,0.28912717,0.116078131,0.025725323,0.002879588,0.025026929,2.17,0.04,2.02,27.1714931
9/2_410,09 Feb,"Scheepers, R. 1990. Magmatic Association and Radioelement Geochemistry of Selected Cape Granites with Special Reference to Subalkaline and Leucogranitic Phases. Stellenbosch University.",Natural s-type granite,-1,-1,-1,-1,-1,-1,-1,-1,-1,74.43,0.45,14.93,0,1.42,1.76,2.26,4.74,2,20,47,0.5,Natural,Natural,Natural,Natural,Natural,Nat,1.238850521,0.07287433,0.035347301,0.292908218,0.100600556,0.031427045,0.005681741,0,1.42,2.32,1.43,100
256_411,256,"Scheepers, R. 1990. Magmatic Association and Radioelement Geochemistry of Selected Cape Granites with Special Reference to Subalkaline and Leucogranitic Phases. Stellenbosch University.",Natural s-type granite,-1,-1,-1,-1,-1,-1,-1,-1,-1,72.7,0.3,14.7,2.22,0.86,1.48,2.64,5.1,2,20,47,0.5,Natural,Natural,Natural,Natural,Natural,Nat,1.210062704,0.085314178,0.021362955,0.288311811,0.108178743,0.026373019,0.003804996,0.03087795,3.08,3.23,1.31,40.8931558
153_412,153,"Scheepers, R. 1990. Magmatic Association and Radioelement Geochemistry of Selected Cape Granites with Special Reference to Subalkaline and Leucogranitic Phases. Stellenbosch University.",Natural s-type granite,-1,-1,-1,-1,-1,-1,-1,-1,-1,70.87,0.6,14.26,3.78,1.2,1.8,2.73,4.77,2,20,47,0.5,Natural,Natural,Natural,Natural,Natural,Nat,1.17956684,0.087955901,0.029665823,0.279654053,0.101327389,0.03216318,0.007485433,0.052607199,4.98,2.73,1.26,36.05777709
G18_413,G18,"Scheepers, R. & Armstrong, R. 2002. New U-Pb SHRIMP zircon ages of the Cape Granite Suite: implications for the magmatic evolution of the Saldania Belt. South African Journal of Geology, 105, 241–256.",Natural s-type granite,-1,-1,-1,-1,-1,-1,-1,-1,-1,71.89,0.56,14.79,3.83,0.96,1.75,1.35,4.87,2,20,47,0.5,Natural,Natural,Natural,Natural,Natural,Nat,1.196641945,0.043420844,0.023746137,0.290153046,0.103410889,0.031261364,0.00700026,0.053286221,4.79,1.39,1.63,30.82618501
G17_414,G17,"Scheepers, R. & Armstrong, R. 2002. New U-Pb SHRIMP zircon ages of the Cape Granite Suite: implications for the magmatic evolution of the Saldania Belt. South African Journal of Geology, 105, 241–256.",Natural s-type granite,-1,-1,-1,-1,-1,-1,-1,-1,-1,71.81,0.55,14.77,3.85,1,1.81,1.32,4.89,2,20,47,0.5,Natural,Natural,Natural,Natural,Natural,Nat,1.195177973,0.04250753,0.02492405,0.289808755,0.103823105,0.032278305,0.006882263,0.053555089,4.85,1.32,1.62,31.75882228
G11_415,G11,"Scheepers, R. & Armstrong, R. 2002. New U-Pb SHRIMP zircon ages of the Cape Granite Suite: implications for the magmatic evolution of the Saldania Belt. South African Journal of Geology, 105, 241–256.",Natural s-type granite,-1,-1,-1,-1,-1,-1,-1,-1,-1,72.26,0.53,14.95,3.81,1.05,1.65,1.32,4.44,2,20,47,0.5,Natural,Natural,Natural,Natural,Natural,Nat,1.202705277,0.042516508,0.02599782,0.293246049,0.094273771,0.02941557,0.006624853,0.05299606,4.86,1.45,1.76,32.91118269
G12_416,G12,"Scheepers, R. & Armstrong, R. 2002. New U-Pb SHRIMP zircon ages of the Cape Granite Suite: implications for the magmatic evolution of the Saldania Belt. South African Journal of Geology, 105, 241–256.",Natural s-type granite,-1,-1,-1,-1,-1,-1,-1,-1,-1,72.12,0.54,14.94,3.93,1.05,1.64,1.32,4.46,2,20,47,0.5,Natural,Natural,Natural,Natural,Natural,Nat,1.200434355,0.042693679,0.026106156,0.293037586,0.09466662,0.029166599,0.0067829,0.054666951,4.98,1.46,1.76,32.32035586
G13_417,G13,"Scheepers, R. & Armstrong, R. 2002. New U-Pb SHRIMP zircon ages of the Cape Granite Suite: implications for the magmatic evolution of the Saldania Belt. South African Journal of Geology, 105, 241–256.",Natural s-type granite,-1,-1,-1,-1,-1,-1,-1,-1,-1,71.17,0.58,14.84,4.11,1.12,1.66,1.96,4.56,2,20,47,0.5,Natural,Natural,Natural,Natural,Natural,Nat,1.184665581,0.063344507,0.027684763,0.291020859,0.096735792,0.029662484,0.007244286,0.057235052,5.23,2.14,1.53,32.60106367
G14_418,G14,"Scheepers, R. & Armstrong, R. 2002. New U-Pb SHRIMP zircon ages of the Cape Granite Suite: implications for the magmatic evolution of the Saldania Belt. South African Journal of Geology, 105, 241–256.",Natural s-type granite,-1,-1,-1,-1,-1,-1,-1,-1,-1,71.46,0.58,14.93,4.13,1.15,1.64,1.46,4.63,2,20,47,0.5,Natural,Natural,Natural,Natural,Natural,Nat,1.18943427,0.04725239,0.028601534,0.292939454,0.09834058,0.029260924,0.007281903,0.057532253,5.29,1.61,1.68,33.20594072
G4_419,G4,"Scheepers, R. & Armstrong, R. 2002. New U-Pb SHRIMP zircon ages of the Cape Granite Suite: implications for the magmatic evolution of the Saldania Belt. South African Journal of Geology, 105, 241–256.",Natural s-type granite,-1,-1,-1,-1,-1,-1,-1,-1,-1,71.8,0.6,15,4.27,1.11,1.66,1.08,4.49,2,20,47,0.5,Natural,Natural,Natural,Natural,Natural,Nat,1.194992331,0.035005514,0.027432834,0.294222802,0.095228035,0.029575121,0.007575012,0.059381351,5.37,1.18,1.84,31.59948341
G2_420,G2,"Scheepers, R. & Armstrong, R. 2002. New U-Pb SHRIMP zircon ages of the Cape Granite Suite: implications for the magmatic evolution of the Saldania Belt. South African Journal of Geology, 105, 241–256.",Natural s-type granite,-1,-1,-1,-1,-1,-1,-1,-1,-1,69.95,0.67,14.89,4.12,1.2,1.81,2.74,4.63,2,20,47,0.5,Natural,Natural,Natural,Natural,Natural,Nat,1.164300761,0.088268943,0.029771406,0.292018954,0.098233651,0.032277652,0.008403337,0.057323713,5.32,2.73,1.33,34.18263405
G3_421,G3,"Scheepers, R. & Armstrong, R. 2002. New U-Pb SHRIMP zircon ages of the Cape Granite Suite: implications for the magmatic evolution of the Saldania Belt. South African Journal of Geology, 105, 241–256.",Natural s-type granite,-1,-1,-1,-1,-1,-1,-1,-1,-1,71.76,0.6,14.9,4.26,1.17,1.7,1.16,4.45,2,20,47,0.5,Natural,Natural,Natural,Natural,Natural,Nat,1.194450879,0.037557532,0.0291376,0.292268805,0.094391561,0.030291122,0.007483438,0.059254829,5.43,1.24,1.8,32.96390942
G15_422,G15,"Scheepers, R. & Armstrong, R. 2002. New U-Pb SHRIMP zircon ages of the Cape Granite Suite: implications for the magmatic evolution of the Saldania Belt. South African Journal of Geology, 105, 241–256.",Natural s-type granite,-1,-1,-1,-1,-1,-1,-1,-1,-1,69.96,0.57,15.59,4.32,1.15,1.65,1.77,5,2,20,47,0.5,Natural,Natural,Natural,Natural,Natural,Nat,1.164402547,0.057125214,0.028420604,0.305784199,0.106123949,0.029340147,0.007171233,0.060152082,5.47,1.95,1.59,32.08732281
G10_423,G10,"Scheepers, R. & Armstrong, R. 2002. New U-Pb SHRIMP zircon ages of the Cape Granite Suite: implications for the magmatic evolution of the Saldania Belt. South African Journal of Geology, 105, 241–256.",Natural s-type granite,-1,-1,-1,-1,-1,-1,-1,-1,-1,71.2,0.62,15.12,4.37,1.19,1.77,1.34,4.4,2,20,47,0.5,Natural,Natural,Natural,Natural,Natural,Nat,1.185164461,0.043155734,0.029552558,0.296559188,0.093390752,0.031487742,0.007718497,0.060789485,5.56,1.37,1.76,32.71185484
G9_424,G9,"Scheepers, R. & Armstrong, R. 2002. New U-Pb SHRIMP zircon ages of the Cape Granite Suite: implications for the magmatic evolution of the Saldania Belt. South African Journal of Geology, 105, 241–256.",Natural s-type granite,-1,-1,-1,-1,-1,-1,-1,-1,-1,71.39,0.62,15.03,4.32,1.23,1.8,1.26,4.35,2,20,47,0.5,Natural,Natural,Natural,Natural,Natural,Nat,1.188219874,0.040816978,0.030605478,0.294868702,0.092329832,0.032063446,0.007722532,0.060093731,5.55,1.27,1.78,33.74393052
G16_425,G16,"Scheepers, R. & Armstrong, R. 2002. New U-Pb SHRIMP zircon ages of the Cape Granite Suite: implications for the magmatic evolution of the Saldania Belt. South African Journal of Geology, 105, 241–256.",Natural s-type granite,-1,-1,-1,-1,-1,-1,-1,-1,-1,69.84,0.58,15.69,4.39,1.2,1.65,1.71,4.94,2,20,47,0.5,Natural,Natural,Natural,Natural,Natural,Nat,1.162418363,0.05531833,0.029773424,0.307683685,0.104943888,0.02938116,0.007274089,0.061111244,5.59,1.88,1.62,32.75956762
G8_426,G8,"Scheepers, R. & Armstrong, R. 2002. New U-Pb SHRIMP zircon ages of the Cape Granite Suite: implications for the magmatic evolution of the Saldania Belt. South African Journal of Geology, 105, 241–256.",Natural s-type granite,-1,-1,-1,-1,-1,-1,-1,-1,-1,70.53,0.65,15.19,4.39,1.2,1.8,1.65,4.6,2,20,47,0.5,Natural,Natural,Natural,Natural,Natural,Nat,1.174014343,0.053253667,0.029802449,0.297900445,0.097574952,0.032036654,0.008108422,0.061061204,5.59,1.66,1.63,32.79908763
G7_427,G7,"Scheepers, R. & Armstrong, R. 2002. New U-Pb SHRIMP zircon ages of the Cape Granite Suite: implications for the magmatic evolution of the Saldania Belt. South African Journal of Geology, 105, 241–256.",Natural s-type granite,-1,-1,-1,-1,-1,-1,-1,-1,-1,71.05,0.64,14.99,4.49,1.23,1.78,1.39,4.44,2,20,47,0.5,Natural,Natural,Natural,Natural,Natural,Nat,1.182587969,0.044790027,0.030554373,0.293966907,0.094169845,0.031823803,0.00797098,0.062462848,5.72,1.41,1.72,32.84808205
G6_428,G6,"Scheepers, R. & Armstrong, R. 2002. New U-Pb SHRIMP zircon ages of the Cape Granite Suite: implications for the magmatic evolution of the Saldania Belt. South African Journal of Geology, 105, 241–256.",Natural s-type granite,-1,-1,-1,-1,-1,-1,-1,-1,-1,69.53,0.76,15.42,4.77,1.27,1.88,2.11,4.26,2,20,47,0.5,Natural,Natural,Natural,Natural,Natural,Nat,1.157319204,0.068164539,0.031498073,0.302499725,0.090360581,0.033586699,0.009511249,0.066336352,6.04,2.03,1.57,32.19528588
174_429,174,"Scheepers, R. 1990. Magmatic Association and Radioelement Geochemistry of Selected Cape Granites with Special Reference to Subalkaline and Leucogranitic Phases. Stellenbosch University.",Natural s-type granite,-1,-1,-1,-1,-1,-1,-1,-1,-1,76.81,0.17,12.38,1.64,0.15,0.76,2.54,5.55,2,20,47,0.5,Natural,Natural,Natural,Natural,Natural,Nat,1.278534848,0.082081301,0.003756615,0.242743984,0.117869006,0.013499921,0.002148547,0.022760529,1.79,6.08,1.14,14.16673923
184_430,184,"Scheepers, R. 1990. Magmatic Association and Radioelement Geochemistry of Selected Cape Granites with Special Reference to Subalkaline and Leucogranitic Phases. Stellenbosch University.",Natural s-type granite,-1,-1,-1,-1,-1,-1,-1,-1,-1,77,0.17,12.21,1.69,0.16,0.69,2.3,5.78,2,20,47,0.5,Natural,Natural,Natural,Natural,Natural,Nat,1.281574012,0.074065408,0.004013943,0.239591172,0.122794476,0.012260968,0.00215224,0.023503345,1.85,6.04,1.15,14.58698705
166_431,166,"Scheepers, R. 1990. Magmatic Association and Radioelement Geochemistry of Selected Cape Granites with Special Reference to Subalkaline and Leucogranitic Phases. Stellenbosch University.",Natural s-type granite,-1,-1,-1,-1,-1,-1,-1,-1,-1,75.9,0.18,12.7,1.92,0.25,0.65,2.81,5.58,2,20,47,0.5,Natural,Natural,Natural,Natural,Natural,Nat,1.263316428,0.090833769,0.006326157,0.249070288,0.11844557,0.011639773,0.002298598,0.026688228,2.17,7.8,1.13,19.16181908
165_432,165,"Scheepers, R. 1990. Magmatic Association and Radioelement Geochemistry of Selected Cape Granites with Special Reference to Subalkaline and Leucogranitic Phases. Stellenbosch University.",Natural s-type granite,-1,-1,-1,-1,-1,-1,-1,-1,-1,76.55,0.17,12.49,1.76,0.39,0.7,2.56,5.37,2,20,47,0.5,Natural,Natural,Natural,Natural,Natural,Nat,1.274119899,0.08254714,0.009608898,0.245094237,0.114033425,0.012540177,0.002169349,0.024541328,2.15,6.58,1.17,28.13714387
179_433,179,"Scheepers, R. 1990. Magmatic Association and Radioelement Geochemistry of Selected Cape Granites with Special Reference to Subalkaline and Leucogranitic Phases. Stellenbosch University.",Natural s-type granite,-1,-1,-1,-1,-1,-1,-1,-1,-1,75.67,0.19,12.85,1.87,0.34,0.54,2.88,5.65,2,20,47,0.5,Natural,Natural,Natural,Natural,Natural,Nat,1.259498906,0.09284862,0.008383874,0.25207349,0.120005583,0.00967768,0.002435987,0.026082179,2.21,9.59,1.13,24.32502012
180_434,180,"Scheepers, R. 1990. Magmatic Association and Radioelement Geochemistry of Selected Cape Granites with Special Reference to Subalkaline and Leucogranitic Phases. Stellenbosch University.",Natural s-type granite,-1,-1,-1,-1,-1,-1,-1,-1,-1,74.54,0.25,13.45,2.1,0.25,0.83,2.61,5.98,2,20,47,0.5,Natural,Natural,Natural,Natural,Natural,Nat,1.240608432,0.084090823,0.006109249,0.263834688,0.126992093,0.014819249,0.003083034,0.029274696,2.35,5.67,1.17,17.26559576
164_435,164,"Scheepers, R. 1990. Magmatic Association and Radioelement Geochemistry of Selected Cape Granites with Special Reference to Subalkaline and Leucogranitic Phases. Stellenbosch University.",Natural s-type granite,-1,-1,-1,-1,-1,-1,-1,-1,-1,75.56,0.2,12.87,2.02,0.34,0.57,2.95,5.49,2,20,47,0.5,Natural,Natural,Natural,Natural,Natural,Nat,1.257623764,0.095274822,0.008559054,0.252358959,0.116540174,0.0101321,0.002540782,0.028103595,2.36,9.4,1.14,23.34543242
182_436,182,"Scheepers, R. 1990. Magmatic Association and Radioelement Geochemistry of Selected Cape Granites with Special Reference to Subalkaline and Leucogranitic Phases. Stellenbosch University.",Natural s-type granite,-1,-1,-1,-1,-1,-1,-1,-1,-1,75.07,0.21,13.26,2.17,0.28,0.51,2.79,5.71,2,20,47,0.5,Natural,Natural,Natural,Natural,Natural,Nat,1.249578445,0.090070099,0.006899805,0.26001848,0.121147472,0.009183487,0.002579251,0.030249448,2.45,9.81,1.18,18.57319948
163_437,163,"Scheepers, R. 1990. Magmatic Association and Radioelement Geochemistry of Selected Cape Granites with Special Reference to Subalkaline and Leucogranitic Phases. Stellenbosch University.",Natural s-type granite,-1,-1,-1,-1,-1,-1,-1,-1,-1,75.12,0.21,13.41,2,0.38,0.48,2.86,5.55,2,20,47,0.5,Natural,Natural,Natural,Natural,Natural,Nat,1.250288332,0.092178404,0.009365578,0.262954638,0.117832012,0.008550574,0.002682518,0.027832414,2.38,10.78,1.2,25.17764344
172_438,172,"Scheepers, R. 1990. Magmatic Association and Radioelement Geochemistry of Selected Cape Granites with Special Reference to Subalkaline and Leucogranitic Phases. Stellenbosch University.",Natural s-type granite,-1,-1,-1,-1,-1,-1,-1,-1,-1,74.57,0.26,13.67,1.85,0.54,0.88,2.59,5.63,2,20,47,0.5,Natural,Natural,Natural,Natural,Natural,Nat,1.24118819,0.083632498,0.013365107,0.268146105,0.119546784,0.015768138,0.003308723,0.025747195,2.39,5.3,1.22,34.17110851
N10_439,N10,"Scheepers, R. & Armstrong, R. 2002. New U-Pb SHRIMP zircon ages of the Cape Granite Suite: implications for the magmatic evolution of the Saldania Belt. South African Journal of Geology, 105, 241–256.",Natural s-type granite,-1,-1,-1,-1,-1,-1,-1,-1,-1,74.93,0.35,14.06,2.63,0.47,1.15,1.16,5.25,2,20,47,0.5,Natural,Natural,Natural,Natural,Natural,Nat,1.24712743,0.037475434,0.011577182,0.275805331,0.111396721,0.020524751,0.004414279,0.036659456,3.1,1.83,1.63,24.00080604
N9_440,N9,"Scheepers, R. & Armstrong, R. 2002. New U-Pb SHRIMP zircon ages of the Cape Granite Suite: implications for the magmatic evolution of the Saldania Belt. South African Journal of Geology, 105, 241–256.",Natural s-type granite,-1,-1,-1,-1,-1,-1,-1,-1,-1,74.97,0.36,13.88,2.64,0.48,1.19,1.23,5.24,2,20,47,0.5,Natural,Natural,Natural,Natural,Natural,Nat,1.247860982,0.03981352,0.011833225,0.272319358,0.111165043,0.021262177,0.00454364,0.036799968,3.12,1.87,1.58,24.3315821
N14_441,N14,"Scheepers, R. & Armstrong, R. 2002. New U-Pb SHRIMP zircon ages of the Cape Granite Suite: implications for the magmatic evolution of the Saldania Belt. South African Journal of Geology, 105, 241–256.",Natural s-type granite,-1,-1,-1,-1,-1,-1,-1,-1,-1,74.82,0.35,13.94,2.72,0.5,1.13,1.3,5.23,2,20,47,0.5,Natural,Natural,Natural,Natural,Natural,Nat,1.245341942,0.042056388,0.012417235,0.273443551,0.111126828,0.020080383,0.004438672,0.037877919,3.22,2.09,1.58,24.68872979
N13_442,N13,"Scheepers, R. & Armstrong, R. 2002. New U-Pb SHRIMP zircon ages of the Cape Granite Suite: implications for the magmatic evolution of the Saldania Belt. South African Journal of Geology, 105, 241–256.",Natural s-type granite,-1,-1,-1,-1,-1,-1,-1,-1,-1,74.5,0.37,14.08,2.74,0.49,1.14,1.49,5.2,2,20,47,0.5,Natural,Natural,Natural,Natural,Natural,Nat,1.239999422,0.048147649,0.012167423,0.276099305,0.110321874,0.020281115,0.004572559,0.038196049,3.23,2.37,1.54,24.1592215
N12_443,N12,"Scheepers, R. & Armstrong, R. 2002. New U-Pb SHRIMP zircon ages of the Cape Granite Suite: implications for the magmatic evolution of the Saldania Belt. South African Journal of Geology, 105, 241–256.",Natural s-type granite,-1,-1,-1,-1,-1,-1,-1,-1,-1,74.77,0.37,13.91,2.72,0.51,1.25,1.25,5.23,2,20,47,0.5,Natural,Natural,Natural,Natural,Natural,Nat,1.244443423,0.040244056,0.012635088,0.272766436,0.110989457,0.022239654,0.004684629,0.037900543,3.23,1.81,1.57,25.00233521
N11_444,N11,"Scheepers, R. & Armstrong, R. 2002. New U-Pb SHRIMP zircon ages of the Cape Granite Suite: implications for the magmatic evolution of the Saldania Belt. South African Journal of Geology, 105, 241–256.",Natural s-type granite,-1,-1,-1,-1,-1,-1,-1,-1,-1,74.47,0.37,14.02,2.75,0.5,1.2,1.41,5.27,2,20,47,0.5,Natural,Natural,Natural,Natural,Natural,Nat,1.239437998,0.045553119,0.012361812,0.275073578,0.11195311,0.021471554,0.004678794,0.03828677,3.25,2.12,1.54,24.40702495
N16_445,N16,"Scheepers, R. & Armstrong, R. 2002. New U-Pb SHRIMP zircon ages of the Cape Granite Suite: implications for the magmatic evolution of the Saldania Belt. South African Journal of Geology, 105, 241–256.",Natural s-type granite,-1,-1,-1,-1,-1,-1,-1,-1,-1,73.96,0.39,14.22,2.82,0.55,1.25,1.52,5.29,2,20,47,0.5,Natural,Natural,Natural,Natural,Natural,Nat,1.230972363,0.048902613,0.013649501,0.278942118,0.11239387,0.022211952,0.004938727,0.039298118,3.37,2.2,1.52,25.77925308
N15_446,N15,"Scheepers, R. & Armstrong, R. 2002. New U-Pb SHRIMP zircon ages of the Cape Granite Suite: implications for the magmatic evolution of the Saldania Belt. South African Journal of Geology, 105, 241–256.",Natural s-type granite,-1,-1,-1,-1,-1,-1,-1,-1,-1,73.98,0.4,14.19,2.84,0.56,1.22,1.6,5.22,2,20,47,0.5,Natural,Natural,Natural,Natural,Natural,Nat,1.23128959,0.051668018,0.013930174,0.278386421,0.110814869,0.02169268,0.004946943,0.039508212,3.4,2.38,1.51,26.06772927
N6_447,N6,"Scheepers, R. & Armstrong, R. 2002. New U-Pb SHRIMP zircon ages of the Cape Granite Suite: implications for the magmatic evolution of the Saldania Belt. South African Journal of Geology, 105, 241–256.",Natural s-type granite,-1,-1,-1,-1,-1,-1,-1,-1,-1,73.66,0.4,14.35,2.89,0.65,1.39,1.73,4.93,2,20,47,0.5,Natural,Natural,Natural,Natural,Natural,Nat,1.226070146,0.055763671,0.016013883,0.281388798,0.104764671,0.024875645,0.004953123,0.040282063,3.54,2.24,1.52,28.44588979
N5_448,N5,"Scheepers, R. & Armstrong, R. 2002. New U-Pb SHRIMP zircon ages of the Cape Granite Suite: implications for the magmatic evolution of the Saldania Belt. South African Journal of Geology, 105, 241–256.",Natural s-type granite,-1,-1,-1,-1,-1,-1,-1,-1,-1,73.81,0.42,14.39,2.93,0.64,1.39,1.5,4.92,2,20,47,0.5,Natural,Natural,Natural,Natural,Natural,Nat,1.228549693,0.048560348,0.015816516,0.28227184,0.104504128,0.024785473,0.005233973,0.04072874,3.56,1.96,1.59,27.97142864
N7_449,N7,"Scheepers, R. & Armstrong, R. 2002. New U-Pb SHRIMP zircon ages of the Cape Granite Suite: implications for the magmatic evolution of the Saldania Belt. South African Journal of Geology, 105, 241–256.",Natural s-type granite,-1,-1,-1,-1,-1,-1,-1,-1,-1,73.77,0.42,14.27,3.01,0.62,1.36,1.35,5.22,2,20,47,0.5,Natural,Natural,Natural,Natural,Natural,Nat,1.227879579,0.043447493,0.015278781,0.279870964,0.110799616,0.024196059,0.005227418,0.041839949,3.62,1.8,1.57,26.74916129
N8_450,N8,"Scheepers, R. & Armstrong, R. 2002. New U-Pb SHRIMP zircon ages of the Cape Granite Suite: implications for the magmatic evolution of the Saldania Belt. South African Journal of Geology, 105, 241–256.",Natural s-type granite,-1,-1,-1,-1,-1,-1,-1,-1,-1,74.06,0.41,14.01,2.97,0.65,1.32,1.42,5.16,2,20,47,0.5,Natural,Natural,Natural,Natural,Natural,Nat,1.232756853,0.045766894,0.016042273,0.274727961,0.109600106,0.023617968,0.00509248,0.041369573,3.62,1.94,1.53,27.94244456
N3_451,N3,"Scheepers, R. & Armstrong, R. 2002. New U-Pb SHRIMP zircon ages of the Cape Granite Suite: implications for the magmatic evolution of the Saldania Belt. South African Journal of Geology, 105, 241–256.",Natural s-type granite,-1,-1,-1,-1,-1,-1,-1,-1,-1,73.66,0.43,14.25,3.11,0.66,1.36,1.52,5.01,2,20,47,0.5,Natural,Natural,Natural,Natural,Natural,Nat,1.226100568,0.048932812,0.0163804,0.279441454,0.106441833,0.024281921,0.005424808,0.043218827,3.77,2.02,1.56,27.48424885
N4_452,N4,"Scheepers, R. & Armstrong, R. 2002. New U-Pb SHRIMP zircon ages of the Cape Granite Suite: implications for the magmatic evolution of the Saldania Belt. South African Journal of Geology, 105, 241–256.",Natural s-type granite,-1,-1,-1,-1,-1,-1,-1,-1,-1,73.41,0.43,14.36,3.11,0.72,1.39,1.56,5.01,2,20,47,0.5,Natural,Natural,Natural,Natural,Natural,Nat,1.221833805,0.050378648,0.017956814,0.281699533,0.106464433,0.024705898,0.005437147,0.043317133,3.84,2.04,1.55,29.30579004
N1_453,N1,"Scheepers, R. & Armstrong, R. 2002. New U-Pb SHRIMP zircon ages of the Cape Granite Suite: implications for the magmatic evolution of the Saldania Belt. South African Journal of Geology, 105, 241–256.",Natural s-type granite,-1,-1,-1,-1,-1,-1,-1,-1,-1,73.34,0.45,14.37,3.22,0.72,1.34,1.6,4.97,2,20,47,0.5,Natural,Natural,Natural,Natural,Natural,Nat,1.220699051,0.051557654,0.017877735,0.281860661,0.105536311,0.023836252,0.005622408,0.044768864,3.94,2.16,1.56,28.5374389
N2_454,N2,"Scheepers, R. & Armstrong, R. 2002. New U-Pb SHRIMP zircon ages of the Cape Granite Suite: implications for the magmatic evolution of the Saldania Belt. South African Journal of Geology, 105, 241–256.",Natural s-type granite,-1,-1,-1,-1,-1,-1,-1,-1,-1,73.33,0.45,14.4,3.21,0.73,1.33,1.57,4.98,2,20,47,0.5,Natural,Natural,Natural,Natural,Natural,Nat,1.220502274,0.050767065,0.01809526,0.282440822,0.10573682,0.023781616,0.005609521,0.044666247,3.94,2.13,1.57,28.83178074
194_455,194,"Scheepers, R. 1990. Magmatic Association and Radioelement Geochemistry of Selected Cape Granites with Special Reference to Subalkaline and Leucogranitic Phases. Stellenbosch University.",Natural s-type granite,-1,-1,-1,-1,-1,-1,-1,-1,-1,73.3,0.28,13.93,3.03,0.51,0.93,2.79,5.22,2,20,47,0.5,Natural,Natural,Natural,Natural,Natural,Nat,1.220104761,0.090032006,0.012699423,0.273247323,0.110802285,0.01664414,0.003518539,0.042187396,3.54,5.41,1.26,23.13747344
193_456,193,"Scheepers, R. 1990. Magmatic Association and Radioelement Geochemistry of Selected Cape Granites with Special Reference to Subalkaline and Leucogranitic Phases. Stellenbosch University.",Natural s-type granite,-1,-1,-1,-1,-1,-1,-1,-1,-1,72.03,0.24,13.41,4.61,0.63,0.93,3.35,4.8,2,20,47,0.5,Natural,Natural,Natural,Natural,Natural,Nat,1.198875876,0.108016181,0.015665512,0.263034541,0.101922744,0.016620787,0.003011659,0.064168787,5.24,6.5,1.16,19.62253334
205_457,205,"Scheepers, R. 1990. Magmatic Association and Radioelement Geochemistry of Selected Cape Granites with Special Reference to Subalkaline and Leucogranitic Phases. Stellenbosch University.",Natural s-type granite,-1,-1,-1,-1,-1,-1,-1,-1,-1,76.66,0.2,12.43,1.74,0.26,1.02,2.43,5.26,2,20,47,0.5,Natural,Natural,Natural,Natural,Natural,Nat,1.276042758,0.078458789,0.006508181,0.243808916,0.111597772,0.018170723,0.002526427,0.02415331,2,4.32,1.17,21.22591082
204_458,204,"Scheepers, R. 1990. Magmatic Association and Radioelement Geochemistry of Selected Cape Granites with Special Reference to Subalkaline and Leucogranitic Phases. Stellenbosch University.",Natural s-type granite,-1,-1,-1,-1,-1,-1,-1,-1,-1,68.62,0.56,13.52,7.59,1.32,1.55,2.68,4.16,2,20,47,0.5,Natural,Natural,Natural,Natural,Natural,Nat,1.142064455,0.086497586,0.03263984,0.265226875,0.088411759,0.027692402,0.007059302,0.105597516,8.9,3.12,1.31,23.61144705
I14_459,I14,"Scheepers, R. & Armstrong, R. 2002. New U-Pb SHRIMP zircon ages of the Cape Granite Suite: implications for the magmatic evolution of the Saldania Belt. South African Journal of Geology, 105, 241–256.",Natural s-type granite,-1,-1,-1,-1,-1,-1,-1,-1,-1,77.16,0.18,13.25,1.77,0.31,0.75,1.7,4.89,2,20,47,0.5,Natural,Natural,Natural,Natural,Natural,Nat,1.284248941,0.054897512,0.007721324,0.259844801,0.10373444,0.013318877,0.002208055,0.024690425,2.09,4.12,1.51,23.82260732
I13_460,I13,"Scheepers, R. & Armstrong, R. 2002. New U-Pb SHRIMP zircon ages of the Cape Granite Suite: implications for the magmatic evolution of the Saldania Belt. South African Journal of Geology, 105, 241–256.",Natural s-type granite,-1,-1,-1,-1,-1,-1,-1,-1,-1,76.63,0.16,13.62,1.8,0.34,0.75,1.75,4.95,2,20,47,0.5,Natural,Natural,Natural,Natural,Natural,Nat,1.275420262,0.056408579,0.00841922,0.267255368,0.105010943,0.013385832,0.002060006,0.025047128,2.14,4.21,1.53,25.15727195
I10_461,I10,"Scheepers, R. & Armstrong, R. 2002. New U-Pb SHRIMP zircon ages of the Cape Granite Suite: implications for the magmatic evolution of the Saldania Belt. South African Journal of Geology, 105, 241–256.",Natural s-type granite,-1,-1,-1,-1,-1,-1,-1,-1,-1,75.51,0.24,14.04,2.01,0.39,0.9,1.78,5.13,2,20,47,0.5,Natural,Natural,Natural,Natural,Natural,Nat,1.256799714,0.05735095,0.009685896,0.275471924,0.108839941,0.016121426,0.00295852,0.028026846,2.4,3.56,1.51,25.68335103
I9_462,I9,"Scheepers, R. & Armstrong, R. 2002. New U-Pb SHRIMP zircon ages of the Cape Granite Suite: implications for the magmatic evolution of the Saldania Belt. South African Journal of Geology, 105, 241–256.",Natural s-type granite,-1,-1,-1,-1,-1,-1,-1,-1,-1,75.6,0.24,14.11,2.07,0.4,0.89,1.52,5.16,2,20,47,0.5,Natural,Natural,Natural,Natural,Natural,Nat,1.258349863,0.049206917,0.010037721,0.276733696,0.109460757,0.015908658,0.002987369,0.028877691,2.48,3.09,1.59,25.79369069
I11_463,I11,"Scheepers, R. & Armstrong, R. 2002. New U-Pb SHRIMP zircon ages of the Cape Granite Suite: implications for the magmatic evolution of the Saldania Belt. South African Journal of Geology, 105, 241–256.",Natural s-type granite,-1,-1,-1,-1,-1,-1,-1,-1,-1,76.18,0.23,13.76,2.08,0.42,0.94,1.76,4.62,2,20,47,0.5,Natural,Natural,Natural,Natural,Natural,Nat,1.267953301,0.056841098,0.010540448,0.269914321,0.098116407,0.016814394,0.002854226,0.028989,2.51,3.38,1.57,26.6647997
I12_464,I12,"Scheepers, R. & Armstrong, R. 2002. New U-Pb SHRIMP zircon ages of the Cape Granite Suite: implications for the magmatic evolution of the Saldania Belt. South African Journal of Geology, 105, 241–256.",Natural s-type granite,-1,-1,-1,-1,-1,-1,-1,-1,-1,76.28,0.23,13.71,2.09,0.44,0.98,1.62,4.66,2,20,47,0.5,Natural,Natural,Natural,Natural,Natural,Nat,1.269596742,0.052155359,0.010866213,0.26897215,0.098961896,0.017479193,0.002872382,0.029028252,2.52,2.98,1.6,27.23739539
I8_465,I8,"Scheepers, R. & Armstrong, R. 2002. New U-Pb SHRIMP zircon ages of the Cape Granite Suite: implications for the magmatic evolution of the Saldania Belt. South African Journal of Geology, 105, 241–256.",Natural s-type granite,-1,-1,-1,-1,-1,-1,-1,-1,-1,75.84,0.24,13.93,2.15,0.48,0.92,1.78,4.67,2,20,47,0.5,Natural,Natural,Natural,Natural,Natural,Nat,1.262238948,0.057414631,0.011806296,0.273322916,0.099052152,0.016417628,0.002979025,0.029948916,2.63,3.5,1.58,28.2750226
I7_466,I7,"Scheepers, R. & Armstrong, R. 2002. New U-Pb SHRIMP zircon ages of the Cape Granite Suite: implications for the magmatic evolution of the Saldania Belt. South African Journal of Geology, 105, 241–256.",Natural s-type granite,-1,-1,-1,-1,-1,-1,-1,-1,-1,75.63,0.24,14.01,2.2,0.48,0.9,1.92,4.63,2,20,47,0.5,Natural,Natural,Natural,Natural,Natural,Nat,1.258780606,0.061842524,0.011887455,0.274793201,0.098406239,0.01597328,0.002999504,0.030589719,2.68,3.87,1.56,27.98551389
I5_467,I5,"Scheepers, R. & Armstrong, R. 2002. New U-Pb SHRIMP zircon ages of the Cape Granite Suite: implications for the magmatic evolution of the Saldania Belt. South African Journal of Geology, 105, 241–256.",Natural s-type granite,-1,-1,-1,-1,-1,-1,-1,-1,-1,73.21,0.28,13.91,3.16,0.51,0.93,2.79,5.21,2,20,47,0.5,Natural,Natural,Natural,Natural,Natural,Nat,1.218514968,0.089914695,0.012682876,0.272891283,0.11065791,0.016622453,0.003513954,0.043946073,3.67,5.41,1.26,22.3964528
101_468,101,"Scheepers, R. 1990. Magmatic Association and Radioelement Geochemistry of Selected Cape Granites with Special Reference to Subalkaline and Leucogranitic Phases. Stellenbosch University.",Natural s-type granite,-1,-1,-1,-1,-1,-1,-1,-1,-1,76.39,0.1,14.12,0,0.07,0.87,3.34,5.1,2,20,47,0.5,Natural,Natural,Natural,Natural,Natural,Nat,1.271462538,0.107878063,0.001814441,0.277060217,0.108242104,0.015462778,0.001308083,0,0.07,6.98,1.2,100
97_469,97,"Scheepers, R. 1990. Magmatic Association and Radioelement Geochemistry of Selected Cape Granites with Special Reference to Subalkaline and Leucogranitic Phases. Stellenbosch University.",Natural s-type granite,-1,-1,-1,-1,-1,-1,-1,-1,-1,76.12,0.1,14.12,0,0.16,1.17,3.44,4.89,2,20,47,0.5,Natural,Natural,Natural,Natural,Natural,Nat,1.266941654,0.111145518,0.003861062,0.276965907,0.103745202,0.020905405,0.001298991,0,0.16,5.32,1.17,100
107_470,107,"Scheepers, R. 1990. Magmatic Association and Radioelement Geochemistry of Selected Cape Granites with Special Reference to Subalkaline and Leucogranitic Phases. Stellenbosch University.",Natural s-type granite,-1,-1,-1,-1,-1,-1,-1,-1,-1,76.6,0.08,12.99,1.32,0.3,0.73,3.5,4.48,2,20,47,0.5,Natural,Natural,Natural,Natural,Natural,Nat,1.27502952,0.112883996,0.007338342,0.254871925,0.095059607,0.013094744,0.001021599,0.018312667,1.61,8.62,1.15,28.60839423
96_471,96,"Scheepers, R. 1990. Magmatic Association and Radioelement Geochemistry of Selected Cape Granites with Special Reference to Subalkaline and Leucogranitic Phases. Stellenbosch University.",Natural s-type granite,-1,-1,-1,-1,-1,-1,-1,-1,-1,74.4,0.2,14.58,1.78,0.15,1.26,3.77,3.86,2,20,47,0.5,Natural,Natural,Natural,Natural,Natural,Nat,1.238333887,0.12178859,0.003806564,0.285896881,0.081868122,0.022434254,0.002561312,0.024771547,1.93,5.43,1.26,13.31985996
98_472,98,"Scheepers, R. 1990. Magmatic Association and Radioelement Geochemistry of Selected Cape Granites with Special Reference to Subalkaline and Leucogranitic Phases. Stellenbosch University.",Natural s-type granite,-1,-1,-1,-1,-1,-1,-1,-1,-1,76.81,0.08,12.71,1.32,0.51,0.75,3.29,4.54,2,20,47,0.5,Natural,Natural,Natural,Natural,Natural,Nat,1.278493462,0.106008625,0.012539769,0.249234086,0.096360141,0.013338772,0.001012512,0.018431165,1.83,7.95,1.16,40.48883078
93_473,93,"Scheepers, R. 1990. Magmatic Association and Radioelement Geochemistry of Selected Cape Granites with Special Reference to Subalkaline and Leucogranitic Phases. Stellenbosch University.",Natural s-type granite,-1,-1,-1,-1,-1,-1,-1,-1,-1,74.6,0.21,15.06,1.89,0.54,0.24,3.62,3.84,2,20,47,0.5,Natural,Natural,Natural,Natural,Natural,Nat,1.241634531,0.116671386,0.013404485,0.295506769,0.081616897,0.004261272,0.002601761,0.026319652,2.43,27.38,1.46,33.74393052
K10_474,K10,"Scheepers, R. & Armstrong, R. 2002. New U-Pb SHRIMP zircon ages of the Cape Granite Suite: implications for the magmatic evolution of the Saldania Belt. South African Journal of Geology, 105, 241–256.",Natural s-type granite,-1,-1,-1,-1,-1,-1,-1,-1,-1,78.13,0.03,13.08,0.79,0.09,0.48,1.92,5.49,2,20,47,0.5,Natural,Natural,Natural,Natural,Natural,Nat,1.300371072,0.061798859,0.002311601,0.256667048,0.116487101,0.008491665,0.00038885,0.010950803,0.88,7.28,1.37,17.4297302
K11_475,K11,"Scheepers, R. & Armstrong, R. 2002. New U-Pb SHRIMP zircon ages of the Cape Granite Suite: implications for the magmatic evolution of the Saldania Belt. South African Journal of Geology, 105, 241–256.",Natural s-type granite,-1,-1,-1,-1,-1,-1,-1,-1,-1,78.08,0.03,13.27,0.79,0.09,0.46,1.75,5.52,2,20,47,0.5,Natural,Natural,Natural,Natural,Natural,Nat,1.299667845,0.056388561,0.002322662,0.260343492,0.117265294,0.008161325,0.000390711,0.011003199,0.88,6.91,1.43,17.4297302
K18_476,K18,"Scheepers, R. & Armstrong, R. 2002. New U-Pb SHRIMP zircon ages of the Cape Granite Suite: implications for the magmatic evolution of the Saldania Belt. South African Journal of Geology, 105, 241–256.",Natural s-type granite,-1,-1,-1,-1,-1,-1,-1,-1,-1,72.29,0.52,14.75,3.81,1.04,1.51,1.51,4.57,2,20,47,0.5,Natural,Natural,Natural,Natural,Natural,Nat,1.203265503,0.048769308,0.025779886,0.289250917,0.096931872,0.026950875,0.00657062,0.053029114,4.85,1.81,1.68,32.71185484
K19_477,K19,"Scheepers, R. & Armstrong, R. 2002. New U-Pb SHRIMP zircon ages of the Cape Granite Suite: implications for the magmatic evolution of the Saldania Belt. South African Journal of Geology, 105, 241–256.",Natural s-type granite,-1,-1,-1,-1,-1,-1,-1,-1,-1,72.06,0.52,14.79,3.85,1.11,1.49,1.59,4.59,2,20,47,0.5,Natural,Natural,Natural,Natural,Natural,Nat,1.199411942,0.0513064,0.027510312,0.290129364,0.097495758,0.026487598,0.006548626,0.053579594,4.96,1.94,1.66,33.92569195
K16_478,K16,"Scheepers, R. & Armstrong, R. 2002. New U-Pb SHRIMP zircon ages of the Cape Granite Suite: implications for the magmatic evolution of the Saldania Belt. South African Journal of Geology, 105, 241–256.",Natural s-type granite,-1,-1,-1,-1,-1,-1,-1,-1,-1,71.43,0.58,14.79,3.97,1.1,1.95,1.55,4.63,2,20,47,0.5,Natural,Natural,Natural,Natural,Natural,Nat,1.188841409,0.050141671,0.027168366,0.290070178,0.098307974,0.034776063,0.007312279,0.055304587,5.07,1.44,1.58,32.94215264
K17_479,K17,"Scheepers, R. & Armstrong, R. 2002. New U-Pb SHRIMP zircon ages of the Cape Granite Suite: implications for the magmatic evolution of the Saldania Belt. South African Journal of Geology, 105, 241–256.",Natural s-type granite,-1,-1,-1,-1,-1,-1,-1,-1,-1,71.61,0.59,14.62,4.01,1.14,1.94,1.5,4.59,2,20,47,0.5,Natural,Natural,Natural,Natural,Natural,Nat,1.19184783,0.048487137,0.028282182,0.286813685,0.09746653,0.034556235,0.007395808,0.055820426,5.15,1.4,1.59,33.62818654
K15_480,K15,"Scheepers, R. & Armstrong, R. 2002. New U-Pb SHRIMP zircon ages of the Cape Granite Suite: implications for the magmatic evolution of the Saldania Belt. South African Journal of Geology, 105, 241–256.",Natural s-type granite,-1,-1,-1,-1,-1,-1,-1,-1,-1,71.33,0.61,14.84,4.09,1.17,1.88,1.43,4.65,2,20,47,0.5,Natural,Natural,Natural,Natural,Natural,Nat,1.187300014,0.046219096,0.029052305,0.291003083,0.098776613,0.033558278,0.007592435,0.05689856,5.26,1.38,1.63,33.80106127
K14_481,K14,"Scheepers, R. & Armstrong, R. 2002. New U-Pb SHRIMP zircon ages of the Cape Granite Suite: implications for the magmatic evolution of the Saldania Belt. South African Journal of Geology, 105, 241–256.",Natural s-type granite,-1,-1,-1,-1,-1,-1,-1,-1,-1,71.26,0.62,14.76,4.09,1.17,1.83,1.63,4.64,2,20,47,0.5,Natural,Natural,Natural,Natural,Natural,Nat,1.186159917,0.052563099,0.029015902,0.289614359,0.098431154,0.032585223,0.007713662,0.056972605,5.26,1.61,1.58,33.74393052
K6_482,K6,"Scheepers, R. & Armstrong, R. 2002. New U-Pb SHRIMP zircon ages of the Cape Granite Suite: implications for the magmatic evolution of the Saldania Belt. South African Journal of Geology, 105, 241–256.",Natural s-type granite,-1,-1,-1,-1,-1,-1,-1,-1,-1,70.3,0.62,14.45,4.2,1.2,1.82,2.64,4.77,2,20,47,0.5,Natural,Natural,Natural,Natural,Natural,Nat,1.170073678,0.085123688,0.029727459,0.283410123,0.101325959,0.032497802,0.007816153,0.058439816,5.4,2.62,1.29,33.71711223
K13_483,K13,"Scheepers, R. & Armstrong, R. 2002. New U-Pb SHRIMP zircon ages of the Cape Granite Suite: implications for the magmatic evolution of the Saldania Belt. South African Journal of Geology, 105, 241–256.",Natural s-type granite,-1,-1,-1,-1,-1,-1,-1,-1,-1,71.46,0.64,14.62,4.36,1.2,1.8,1.61,4.31,2,20,47,0.5,Natural,Natural,Natural,Natural,Natural,Nat,1.189358392,0.052079123,0.029775478,0.286744793,0.091594281,0.032100706,0.008031247,0.06062403,5.56,1.62,1.63,32.93765482
K12_484,K12,"Scheepers, R. & Armstrong, R. 2002. New U-Pb SHRIMP zircon ages of the Cape Granite Suite: implications for the magmatic evolution of the Saldania Belt. South African Journal of Geology, 105, 241–256.",Natural s-type granite,-1,-1,-1,-1,-1,-1,-1,-1,-1,71.46,0.63,14.66,4.37,1.22,1.79,1.5,4.37,2,20,47,0.5,Natural,Natural,Natural,Natural,Natural,Nat,1.18943427,0.04825776,0.030147563,0.287642913,0.092828216,0.031853664,0.007932073,0.060856981,5.59,1.51,1.66,33.12753604
K4_485,K4,"Scheepers, R. & Armstrong, R. 2002. New U-Pb SHRIMP zircon ages of the Cape Granite Suite: implications for the magmatic evolution of the Saldania Belt. South African Journal of Geology, 105, 241–256.",Natural s-type granite,-1,-1,-1,-1,-1,-1,-1,-1,-1,70.54,0.65,14.13,4.4,1.3,1.86,2.65,4.47,2,20,47,0.5,Natural,Natural,Natural,Natural,Natural,Nat,1.174098459,0.085480862,0.032364583,0.277128978,0.094802157,0.033102666,0.008166398,0.06131308,5.71,2.58,1.3,34.54887924
K5_486,K5,"Scheepers, R. & Armstrong, R. 2002. New U-Pb SHRIMP zircon ages of the Cape Granite Suite: implications for the magmatic evolution of the Saldania Belt. South African Journal of Geology, 105, 241–256.",Natural s-type granite,-1,-1,-1,-1,-1,-1,-1,-1,-1,70.15,0.63,14.31,4.6,1.42,1.8,2.49,4.6,2,20,47,0.5,Natural,Natural,Natural,Natural,Natural,Nat,1.167692423,0.080201744,0.035202026,0.280673088,0.097632925,0.032119307,0.007937425,0.064006887,6.02,2.5,1.34,35.48272537
K2_487,K2,"Scheepers, R. & Armstrong, R. 2002. New U-Pb SHRIMP zircon ages of the Cape Granite Suite: implications for the magmatic evolution of the Saldania Belt. South African Journal of Geology, 105, 241–256.",Natural s-type granite,-1,-1,-1,-1,-1,-1,-1,-1,-1,68.35,0.56,13.47,7.94,1.31,1.55,2.67,4.15,2,20,47,0.5,Natural,Natural,Natural,Natural,Natural,Nat,1.137675794,0.086165198,0.032514414,0.264207676,0.088072016,0.027585987,0.007032175,0.110540464,9.25,3.12,1.31,22.72862986
K8_488,K8,"Scheepers, R. & Armstrong, R. 2002. New U-Pb SHRIMP zircon ages of the Cape Granite Suite: implications for the magmatic evolution of the Saldania Belt. South African Journal of Geology, 105, 241–256.",Natural s-type granite,-1,-1,-1,-1,-1,-1,-1,-1,-1,66.86,0.88,14.66,6.98,2.06,1.47,1.93,5.16,2,20,47,0.5,Natural,Natural,Natural,Natural,Natural,Nat,1.112899271,0.062350773,0.05101701,0.287605341,0.109469723,0.026164646,0.010996928,0.097223348,9.04,2.38,1.45,34.41506098
K9_489,K9,"Scheepers, R. & Armstrong, R. 2002. New U-Pb SHRIMP zircon ages of the Cape Granite Suite: implications for the magmatic evolution of the Saldania Belt. South African Journal of Geology, 105, 241–256.",Natural s-type granite,-1,-1,-1,-1,-1,-1,-1,-1,-1,67.45,0.88,14.59,7.05,2.12,1.47,1.26,5.17,2,20,47,0.5,Natural,Natural,Natural,Natural,Natural,Nat,1.12273158,0.04061319,0.052646995,0.286255422,0.109756782,0.026153338,0.011070134,0.098160118,9.17,1.55,1.62,34.91015383
A37_490,A37,"Scheepers, R. & Poujol, M. 2002. U-Pb zircon age of Cape Granite Suite ignimbrites: characteristics of the last phases of the Saldanian magmatism. South African Journal of Geology, 105, 163–178, https://doi.org/10.2113/105.2.163.",Natural s-type granite,-1,-1,-1,-1,-1,-1,-1,-1,-1,79.06,0.16,12.53,0.56,0.05,0.34,1.86,5.43,2,20,47,0.5,Natural,Natural,Natural,Natural,Natural,Nat,1.315983548,0.060124515,0.001270024,0.245796637,0.11519916,0.006024492,0.002050937,0.007837301,0.61,9.98,1.36,13.94508149
A24_491,A24,"Scheepers, R. & Poujol, M. 2002. U-Pb zircon age of Cape Granite Suite ignimbrites: characteristics of the last phases of the Saldanian magmatism. South African Journal of Geology, 105, 163–178, https://doi.org/10.2113/105.2.163.",Natural s-type granite,-1,-1,-1,-1,-1,-1,-1,-1,-1,78.48,0.16,12.26,1.42,0.08,0.58,1.78,5.24,2,20,47,0.5,Natural,Natural,Natural,Natural,Natural,Nat,1.30627736,0.057503858,0.00205646,0.240418343,0.111304391,0.010346247,0.001945862,0.019756625,1.5,5.56,1.34,9.427643095
A10_492,A10,"Scheepers, R. & Poujol, M. 2002. U-Pb zircon age of Cape Granite Suite ignimbrites: characteristics of the last phases of the Saldanian magmatism. South African Journal of Geology, 105, 163–178, https://doi.org/10.2113/105.2.163.",Natural s-type granite,-1,-1,-1,-1,-1,-1,-1,-1,-1,78.03,0.17,12.66,1.39,0.1,0.38,1.82,5.45,2,20,47,0.5,Natural,Natural,Natural,Natural,Natural,Nat,1.298764295,0.058610749,0.002546043,0.248389644,0.115688921,0.006770676,0.002184264,0.019282415,1.49,8.66,1.37,11.66386938
A23_493,A23,"Scheepers, R. & Poujol, M. 2002. U-Pb zircon age of Cape Granite Suite ignimbrites: characteristics of the last phases of the Saldanian magmatism. South African Journal of Geology, 105, 163–178, https://doi.org/10.2113/105.2.163.",Natural s-type granite,-1,-1,-1,-1,-1,-1,-1,-1,-1,78.61,0.18,12.11,1.49,0.09,0.44,1.75,5.33,2,20,47,0.5,Natural,Natural,Natural,Natural,Natural,Nat,1.30839205,0.056472456,0.002298751,0.23747035,0.113216768,0.007893734,0.002191235,0.020776835,1.59,7.15,1.34,9.961831744
A40_494,A40,"Scheepers, R. & Poujol, M. 2002. U-Pb zircon age of Cape Granite Suite ignimbrites: characteristics of the last phases of the Saldanian magmatism. South African Journal of Geology, 105, 163–178, https://doi.org/10.2113/105.2.163.",Natural s-type granite,-1,-1,-1,-1,-1,-1,-1,-1,-1,78.29,0.15,12.23,1.61,0.07,0.71,1.64,5.29,2,20,47,0.5,Natural,Natural,Natural,Natural,Natural,Nat,1.303157514,0.053018809,0.001772408,0.239814384,0.112234686,0.012738797,0.001916671,0.022443202,1.68,4.16,1.35,7.319280538
A6_495,A6,"Scheepers, R. & Poujol, M. 2002. U-Pb zircon age of Cape Granite Suite ignimbrites: characteristics of the last phases of the Saldanian magmatism. South African Journal of Geology, 105, 163–178, https://doi.org/10.2113/105.2.163.",Natural s-type granite,-1,-1,-1,-1,-1,-1,-1,-1,-1,78.02,0.16,11.94,1.5,0.13,0.37,2.46,5.41,2,20,47,0.5,Natural,Natural,Natural,Natural,Natural,Nat,1.298657244,0.079236404,0.003300035,0.234206363,0.114911219,0.006568138,0.002049678,0.02093411,1.64,12.06,1.17,13.61729541
A7_496,A7,"Scheepers, R. & Poujol, M. 2002. U-Pb zircon age of Cape Granite Suite ignimbrites: characteristics of the last phases of the Saldanian magmatism. South African Journal of Geology, 105, 163–178, https://doi.org/10.2113/105.2.163.",Natural s-type granite,-1,-1,-1,-1,-1,-1,-1,-1,-1,77.72,0.16,12.5,1.56,0.1,0.42,2.15,5.38,2,20,47,0.5,Natural,Natural,Natural,Natural,Natural,Nat,1.293542766,0.069385045,0.002552591,0.245194194,0.114239033,0.007521938,0.002061065,0.021766411,1.67,9.22,1.28,10.49628291
A26_497,A26,"Scheepers, R. & Poujol, M. 2002. U-Pb zircon age of Cape Granite Suite ignimbrites: characteristics of the last phases of the Saldanian magmatism. South African Journal of Geology, 105, 163–178, https://doi.org/10.2113/105.2.163.",Natural s-type granite,-1,-1,-1,-1,-1,-1,-1,-1,-1,78.22,0.17,12.27,1.58,0.1,0.66,1.79,5.22,2,20,47,0.5,Natural,Natural,Natural,Natural,Natural,Nat,1.301875709,0.05788016,0.00257244,0.24059283,0.110724785,0.011832864,0.002077092,0.021935667,1.68,4.89,1.33,10.49628291
A13_498,A13,"Scheepers, R. & Poujol, M. 2002. U-Pb zircon age of Cape Granite Suite ignimbrites: characteristics of the last phases of the Saldanian magmatism. South African Journal of Geology, 105, 163–178, https://doi.org/10.2113/105.2.163.",Natural s-type granite,-1,-1,-1,-1,-1,-1,-1,-1,-1,78.22,0.18,12.28,1.63,0.08,0.37,1.87,5.37,2,20,47,0.5,Natural,Natural,Natural,Natural,Natural,Nat,1.301923436,0.06031905,0.002049876,0.240864109,0.11401776,0.006629865,0.00219825,0.022712066,1.71,9.1,1.33,8.278332843
A9_499,A9,"Scheepers, R. & Poujol, M. 2002. U-Pb zircon age of Cape Granite Suite ignimbrites: characteristics of the last phases of the Saldanian magmatism. South African Journal of Geology, 105, 163–178, https://doi.org/10.2113/105.2.163.",Natural s-type granite,-1,-1,-1,-1,-1,-1,-1,-1,-1,77.85,0.16,12.31,1.59,0.11,0.62,2.08,5.27,2,20,47,0.5,Natural,Natural,Natural,Natural,Natural,Nat,1.295725595,0.067089433,0.002795197,0.241477608,0.111984664,0.011140744,0.002051778,0.022095988,1.7,6.02,1.27,11.22966704
A12_500,A12,"Scheepers, R. & Poujol, M. 2002. U-Pb zircon age of Cape Granite Suite ignimbrites: characteristics of the last phases of the Saldanian magmatism. South African Journal of Geology, 105, 163–178, https://doi.org/10.2113/105.2.163.",Natural s-type granite,-1,-1,-1,-1,-1,-1,-1,-1,-1,77.58,0.17,12.64,1.64,0.09,0.6,1.89,5.38,2,20,47,0.5,Natural,Natural,Natural,Natural,Natural,Nat,1.291298477,0.061092817,0.002310166,0.247984527,0.114218288,0.010700235,0.00207258,0.022896011,1.74,5.71,1.33,9.165080131
A8_501,A8,"Scheepers, R. & Poujol, M. 2002. U-Pb zircon age of Cape Granite Suite ignimbrites: characteristics of the last phases of the Saldanian magmatism. South African Journal of Geology, 105, 163–178, https://doi.org/10.2113/105.2.163.",Natural s-type granite,-1,-1,-1,-1,-1,-1,-1,-1,-1,78.45,0.17,12.03,1.62,0.11,0.41,1.75,5.45,2,20,47,0.5,Natural,Natural,Natural,Natural,Natural,Nat,1.305829492,0.056606484,0.002816253,0.236009848,0.115676309,0.007360436,0.002067233,0.022549689,1.73,7.69,1.31,11.10249642
A38_502,A38,"Scheepers, R. & Poujol, M. 2002. U-Pb zircon age of Cape Granite Suite ignimbrites: characteristics of the last phases of the Saldanian magmatism. South African Journal of Geology, 105, 163–178, https://doi.org/10.2113/105.2.163.",Natural s-type granite,-1,-1,-1,-1,-1,-1,-1,-1,-1,78.26,0.15,12.18,1.63,0.11,0.6,1.72,5.34,2,20,47,0.5,Natural,Natural,Natural,Natural,Natural,Nat,1.302522317,0.055369179,0.002787489,0.239008619,0.113410622,0.010745759,0.001918237,0.022745863,1.75,5.15,1.33,10.91705084
A27_503,A27,"Scheepers, R. & Poujol, M. 2002. U-Pb zircon age of Cape Granite Suite ignimbrites: characteristics of the last phases of the Saldanian magmatism. South African Journal of Geology, 105, 163–178, https://doi.org/10.2113/105.2.163.",Natural s-type granite,-1,-1,-1,-1,-1,-1,-1,-1,-1,78.03,0.16,12.13,1.65,0.11,0.72,2.05,5.15,2,20,47,0.5,Natural,Natural,Natural,Natural,Natural,Nat,1.298848209,0.066057371,0.002793481,0.237916168,0.109308142,0.012776609,0.002050518,0.022937221,1.76,5.17,1.26,10.85660469
All_504,All,"Scheepers, R. & Poujol, M. 2002. U-Pb zircon age of Cape Granite Suite ignimbrites: characteristics of the last phases of the Saldanian magmatism. South African Journal of Geology, 105, 163–178, https://doi.org/10.2113/105.2.163.",Natural s-type granite,-1,-1,-1,-1,-1,-1,-1,-1,-1,77.44,0.16,12.59,1.67,0.1,0.69,2.01,5.34,2,20,47,0.5,Natural,Natural,Natural,Natural,Natural,Nat,1.288897356,0.064770561,0.002553905,0.246935666,0.113423657,0.012298273,0.002062126,0.023210351,1.77,5.27,1.3,9.912589734
A25_505,A25,"Scheepers, R. & Poujol, M. 2002. U-Pb zircon age of Cape Granite Suite ignimbrites: characteristics of the last phases of the Saldanian magmatism. South African Journal of Geology, 105, 163–178, https://doi.org/10.2113/105.2.163.",Natural s-type granite,-1,-1,-1,-1,-1,-1,-1,-1,-1,77.88,0.17,12.3,1.68,0.1,0.75,1.91,5.21,2,20,47,0.5,Natural,Natural,Natural,Natural,Natural,Nat,1.296193141,0.061632973,0.002561551,0.241194536,0.110694491,0.013439729,0.0020683,0.023423546,1.79,4.59,1.3,9.857771149
A28_506,A28,"Scheepers, R. & Poujol, M. 2002. U-Pb zircon age of Cape Granite Suite ignimbrites: characteristics of the last phases of the Saldanian magmatism. South African Journal of Geology, 105, 163–178, https://doi.org/10.2113/105.2.163.",Natural s-type granite,-1,-1,-1,-1,-1,-1,-1,-1,-1,77.93,0.16,12.26,1.69,0.1,0.72,1.94,5.2,2,20,47,0.5,Natural,Natural,Natural,Natural,Natural,Nat,1.29705171,0.062468973,0.002541349,0.240497757,0.110473857,0.01278577,0.002051988,0.023523945,1.79,4.89,1.29,9.749933027
A20_507,A20,"Scheepers, R. & Poujol, M. 2002. U-Pb zircon age of Cape Granite Suite ignimbrites: characteristics of the last phases of the Saldanian magmatism. South African Journal of Geology, 105, 163–178, https://doi.org/10.2113/105.2.163.",Natural s-type granite,-1,-1,-1,-1,-1,-1,-1,-1,-1,77.44,0.19,12.73,1.62,0.14,0.69,1.83,5.36,2,20,47,0.5,Natural,Natural,Natural,Natural,Natural,Nat,1.288898294,0.058979941,0.003586913,0.249751707,0.113786744,0.012337642,0.002327318,0.022565989,1.77,4.78,1.35,13.71516128
A29_508,A29,"Scheepers, R. & Poujol, M. 2002. U-Pb zircon age of Cape Granite Suite ignimbrites: characteristics of the last phases of the Saldanian magmatism. South African Journal of Geology, 105, 163–178, https://doi.org/10.2113/105.2.163.",Natural s-type granite,-1,-1,-1,-1,-1,-1,-1,-1,-1,77.83,0.17,12.41,1.68,0.11,0.72,1.82,5.26,2,20,47,0.5,Natural,Natural,Natural,Natural,Natural,Nat,1.295431986,0.058810692,0.002826168,0.243340701,0.111686472,0.012926113,0.002074511,0.023349752,1.79,4.55,1.33,10.79682422
A14_509,A14,"Scheepers, R. & Poujol, M. 2002. U-Pb zircon age of Cape Granite Suite ignimbrites: characteristics of the last phases of the Saldanian magmatism. South African Journal of Geology, 105, 163–178, https://doi.org/10.2113/105.2.163.",Natural s-type granite,-1,-1,-1,-1,-1,-1,-1,-1,-1,77.64,0.16,12.55,1.7,0.12,0.62,1.91,5.29,2,20,47,0.5,Natural,Natural,Natural,Natural,Natural,Nat,1.292307899,0.061698589,0.00306059,0.246202394,0.112399081,0.010998661,0.00205937,0.023608581,1.82,5.61,1.33,11.47613651
A39_510,A39,"Scheepers, R. & Poujol, M. 2002. U-Pb zircon age of Cape Granite Suite ignimbrites: characteristics of the last phases of the Saldanian magmatism. South African Journal of Geology, 105, 163–178, https://doi.org/10.2113/105.2.163.",Natural s-type granite,-1,-1,-1,-1,-1,-1,-1,-1,-1,77.42,0.17,12.57,1.72,0.11,0.77,1.87,5.37,2,20,47,0.5,Natural,Natural,Natural,Natural,Natural,Nat,1.288560409,0.06020464,0.002797776,0.246526361,0.114046801,0.013710274,0.002182025,0.023971295,1.83,4.39,1.31,10.45152452
A31_511,A31,"Scheepers, R. & Poujol, M. 2002. U-Pb zircon age of Cape Granite Suite ignimbrites: characteristics of the last phases of the Saldanian magmatism. South African Journal of Geology, 105, 163–178, https://doi.org/10.2113/105.2.163.",Natural s-type granite,-1,-1,-1,-1,-1,-1,-1,-1,-1,76.39,0.16,13.17,1.74,0.1,0.68,2.25,5.49,2,20,47,0.5,Natural,Natural,Natural,Natural,Natural,Nat,1.271541048,0.072514664,0.002557591,0.258413095,0.116651358,0.0121322,0.002065102,0.024248211,1.85,5.98,1.28,9.541183346
A22_512,A22,"Scheepers, R. & Poujol, M. 2002. U-Pb zircon age of Cape Granite Suite ignimbrites: characteristics of the last phases of the Saldanian magmatism. South African Journal of Geology, 105, 163–178, https://doi.org/10.2113/105.2.163.",Natural s-type granite,-1,-1,-1,-1,-1,-1,-1,-1,-1,76.77,0.17,13.09,1.81,0.11,0.59,1.91,5.54,2,20,47,0.5,Natural,Natural,Natural,Natural,Natural,Nat,1.27777643,0.061758901,0.002778408,0.256801167,0.117580106,0.010529215,0.00216692,0.025222339,1.92,5.87,1.35,9.922622319
A32_513,A32,"Scheepers, R. & Poujol, M. 2002. U-Pb zircon age of Cape Granite Suite ignimbrites: characteristics of the last phases of the Saldanian magmatism. South African Journal of Geology, 105, 163–178, https://doi.org/10.2113/105.2.163.",Natural s-type granite,-1,-1,-1,-1,-1,-1,-1,-1,-1,76.96,0.17,12.66,1.82,0.12,0.72,2.25,5.29,2,20,47,0.5,Natural,Natural,Natural,Natural,Natural,Nat,1.280923141,0.072630181,0.003059961,0.24836937,0.112375977,0.012829134,0.002187631,0.025320363,1.94,5.66,1.26,10.78198183
A30_514,A30,"Scheepers, R. & Poujol, M. 2002. U-Pb zircon age of Cape Granite Suite ignimbrites: characteristics of the last phases of the Saldanian magmatism. South African Journal of Geology, 105, 163–178, https://doi.org/10.2113/105.2.163.",Natural s-type granite,-1,-1,-1,-1,-1,-1,-1,-1,-1,76.47,0.16,13.02,1.85,0.11,0.66,2.3,5.43,2,20,47,0.5,Natural,Natural,Natural,Natural,Natural,Nat,1.272802673,0.074174056,0.002800647,0.255434731,0.115253181,0.011711439,0.002055778,0.025709886,1.96,6.33,1.27,9.823201173
A4_515,A4,"Scheepers, R. & Poujol, M. 2002. U-Pb zircon age of Cape Granite Suite ignimbrites: characteristics of the last phases of the Saldanian magmatism. South African Journal of Geology, 105, 163–178, https://doi.org/10.2113/105.2.163.",Natural s-type granite,-1,-1,-1,-1,-1,-1,-1,-1,-1,76.96,0.17,12.39,1.74,0.17,0.79,2.54,5.23,2,20,47,0.5,Natural,Natural,Natural,Natural,Natural,Nat,1.280938044,0.081998532,0.004253203,0.2430926,0.111113323,0.014025761,0.00214638,0.024281487,1.92,5.85,1.17,14.90537746
A18_516,A18,"Scheepers, R. & Poujol, M. 2002. U-Pb zircon age of Cape Granite Suite ignimbrites: characteristics of the last phases of the Saldanian magmatism. South African Journal of Geology, 105, 163–178, https://doi.org/10.2113/105.2.163.",Natural s-type granite,-1,-1,-1,-1,-1,-1,-1,-1,-1,77.11,0.16,12.7,1.87,0.1,0.67,2.04,5.34,2,20,47,0.5,Natural,Natural,Natural,Natural,Natural,Nat,1.283522269,0.065807674,0.002555483,0.249108613,0.113275073,0.011938534,0.002063401,0.026091941,1.98,5.51,1.3,8.920464383
A16_517,A16,"Scheepers, R. & Poujol, M. 2002. U-Pb zircon age of Cape Granite Suite ignimbrites: characteristics of the last phases of the Saldanian magmatism. South African Journal of Geology, 105, 163–178, https://doi.org/10.2113/105.2.163.",Natural s-type granite,-1,-1,-1,-1,-1,-1,-1,-1,-1,76.75,0.17,13.1,1.85,0.12,0.7,1.83,5.48,2,20,47,0.5,Natural,Natural,Natural,Natural,Natural,Nat,1.277386483,0.058972141,0.00305682,0.256975599,0.116402255,0.012449792,0.002185385,0.025723084,1.97,4.74,1.37,10.6213687
Al_518,Al,"Scheepers, R. & Poujol, M. 2002. U-Pb zircon age of Cape Granite Suite ignimbrites: characteristics of the last phases of the Saldanian magmatism. South African Journal of Geology, 105, 163–178, https://doi.org/10.2113/105.2.163.",Natural s-type granite,-1,-1,-1,-1,-1,-1,-1,-1,-1,75.21,0.18,13.46,1.74,0.19,0.76,2.62,5.83,2,20,47,0.5,Natural,Natural,Natural,Natural,Natural,Nat,1.251766195,0.084679426,0.00473972,0.264078042,0.123810829,0.013626279,0.002266012,0.024210689,1.93,6.21,1.19,16.37185865
A21_519,A21,"Scheepers, R. & Poujol, M. 2002. U-Pb zircon age of Cape Granite Suite ignimbrites: characteristics of the last phases of the Saldanian magmatism. South African Journal of Geology, 105, 163–178, https://doi.org/10.2113/105.2.163.",Natural s-type granite,-1,-1,-1,-1,-1,-1,-1,-1,-1,76.89,0.19,13.04,1.91,0.11,0.32,2.06,5.48,2,20,47,0.5,Natural,Natural,Natural,Natural,Natural,Nat,1.279841594,0.06633133,0.002819162,0.255705049,0.116453727,0.00571023,0.00232804,0.026598736,2.02,11.62,1.36,9.583151743
A5_520,A5,"Scheepers, R. & Poujol, M. 2002. U-Pb zircon age of Cape Granite Suite ignimbrites: characteristics of the last phases of the Saldanian magmatism. South African Journal of Geology, 105, 163–178, https://doi.org/10.2113/105.2.163.",Natural s-type granite,-1,-1,-1,-1,-1,-1,-1,-1,-1,76.79,0.18,12.46,1.79,0.18,0.78,2.55,5.26,2,20,47,0.5,Natural,Natural,Natural,Natural,Natural,Nat,1.278169668,0.082370847,0.004541863,0.244371311,0.111630687,0.013964224,0.002292052,0.024913579,1.97,5.9,1.18,15.41943508
A19_521,A19,"Scheepers, R. & Poujol, M. 2002. U-Pb zircon age of Cape Granite Suite ignimbrites: characteristics of the last phases of the Saldanian magmatism. South African Journal of Geology, 105, 163–178, https://doi.org/10.2113/105.2.163.",Natural s-type granite,-1,-1,-1,-1,-1,-1,-1,-1,-1,76.07,0.19,13.34,1.9,0.13,0.6,2.16,5.61,2,20,47,0.5,Natural,Natural,Natural,Natural,Natural,Nat,1.266166468,0.069803207,0.00332247,0.261661707,0.119191649,0.010653943,0.002321565,0.026381383,2.03,6.55,1.31,11.18531806
A15_522,A15,"Scheepers, R. & Poujol, M. 2002. U-Pb zircon age of Cape Granite Suite ignimbrites: characteristics of the last phases of the Saldanian magmatism. South African Journal of Geology, 105, 163–178, https://doi.org/10.2113/105.2.163.",Natural s-type granite,-1,-1,-1,-1,-1,-1,-1,-1,-1,76.67,0.18,13.13,1.94,0.12,0.59,1.7,5.67,2,20,47,0.5,Natural,Natural,Natural,Natural,Natural,Nat,1.276151092,0.054846307,0.003085649,0.257569525,0.120360536,0.010534276,0.002205996,0.026975456,2.06,5.21,1.39,10.26458847
A2_523,A2,"Scheepers, R. & Poujol, M. 2002. U-Pb zircon age of Cape Granite Suite ignimbrites: characteristics of the last phases of the Saldanian magmatism. South African Journal of Geology, 105, 163–178, https://doi.org/10.2113/105.2.163.",Natural s-type granite,-1,-1,-1,-1,-1,-1,-1,-1,-1,74.88,0.17,13.67,1.83,0.19,0.67,2.86,5.73,2,20,47,0.5,Natural,Natural,Natural,Natural,Natural,Nat,1.246289032,0.092308263,0.004731633,0.26815577,0.121681645,0.011992143,0.00213647,0.025426744,2.02,7.7,1.19,15.68928126
A36_524,A36,"Scheepers, R. & Poujol, M. 2002. U-Pb zircon age of Cape Granite Suite ignimbrites: characteristics of the last phases of the Saldanian magmatism. South African Journal of Geology, 105, 163–178, https://doi.org/10.2113/105.2.163.",Natural s-type granite,-1,-1,-1,-1,-1,-1,-1,-1,-1,76.98,0.18,12.65,1.97,0.13,0.74,1.96,5.39,2,20,47,0.5,Natural,Natural,Natural,Natural,Natural,Nat,1.281281316,0.06320737,0.003325211,0.248126413,0.114474577,0.013236492,0.002194397,0.027407608,2.1,4.78,1.3,10.81973863
A3_525,A3,"Scheepers, R. & Poujol, M. 2002. U-Pb zircon age of Cape Granite Suite ignimbrites: characteristics of the last phases of the Saldanian magmatism. South African Journal of Geology, 105, 163–178, https://doi.org/10.2113/105.2.163.",Natural s-type granite,-1,-1,-1,-1,-1,-1,-1,-1,-1,75.09,0.17,13.5,1.96,0.18,0.74,2.71,5.64,2,20,47,0.5,Natural,Natural,Natural,Natural,Natural,Nat,1.249878716,0.087327222,0.004476309,0.264830373,0.119808468,0.013226468,0.002133472,0.027344223,2.14,6.6,1.2,14.06736084
A17_526,A17,"Scheepers, R. & Poujol, M. 2002. U-Pb zircon age of Cape Granite Suite ignimbrites: characteristics of the last phases of the Saldanian magmatism. South African Journal of Geology, 105, 163–178, https://doi.org/10.2113/105.2.163.",Natural s-type granite,-1,-1,-1,-1,-1,-1,-1,-1,-1,76.07,0.2,13.19,1.98,0.17,0.71,2.08,5.6,2,20,47,0.5,Natural,Natural,Natural,Natural,Natural,Nat,1.266129809,0.067005995,0.004335837,0.258704071,0.1189466,0.01264846,0.002445502,0.027614885,2.16,5.3,1.3,13.57038677
A35_527,A35,"Scheepers, R. & Poujol, M. 2002. U-Pb zircon age of Cape Granite Suite ignimbrites: characteristics of the last phases of the Saldanian magmatism. South African Journal of Geology, 105, 163–178, https://doi.org/10.2113/105.2.163.",Natural s-type granite,-1,-1,-1,-1,-1,-1,-1,-1,-1,74.13,0.26,14.19,2.19,0.23,1.13,1.99,5.88,2,20,47,0.5,Natural,Natural,Natural,Natural,Natural,Nat,1.233890644,0.064283463,0.005627784,0.278370371,0.124792188,0.020224231,0.003210506,0.030473653,2.42,3.18,1.33,15.58880892
A33_528,A33,"Scheepers, R. & Poujol, M. 2002. U-Pb zircon age of Cape Granite Suite ignimbrites: characteristics of the last phases of the Saldanian magmatism. South African Journal of Geology, 105, 163–178, https://doi.org/10.2113/105.2.163.",Natural s-type granite,-1,-1,-1,-1,-1,-1,-1,-1,-1,71.83,0.4,14.87,3.08,0.41,1.63,2.2,5.55,2,20,47,0.5,Natural,Natural,Natural,Natural,Natural,Nat,1.195654449,0.071093323,0.010265282,0.291757758,0.117927947,0.029142887,0.005050868,0.042903144,3.5,2.44,1.34,19.30710175
A34_529,A34,"Scheepers, R. & Poujol, M. 2002. U-Pb zircon age of Cape Granite Suite ignimbrites: characteristics of the last phases of the Saldanian magmatism. South African Journal of Geology, 105, 163–178, https://doi.org/10.2113/105.2.163.",Natural s-type granite,-1,-1,-1,-1,-1,-1,-1,-1,-1,69.81,0.48,15.59,3.71,0.52,2.02,2.38,5.48,2,20,47,0.5,Natural,Natural,Natural,Natural,Natural,Nat,1.162017888,0.076917846,0.013000827,0.305730683,0.116267833,0.036093719,0.006046293,0.051626178,4.23,2.13,1.33,20.11671022
B26_530,B26,"Scheepers, R. & Poujol, M. 2002. U-Pb zircon age of Cape Granite Suite ignimbrites: characteristics of the last phases of the Saldanian magmatism. South African Journal of Geology, 105, 163–178, https://doi.org/10.2113/105.2.163.",Natural s-type granite,-1,-1,-1,-1,-1,-1,-1,-1,-1,75.22,0.22,13.42,1.89,0.25,0.7,2.63,5.67,2,20,47,0.5,Natural,Natural,Natural,Natural,Natural,Nat,1.251993866,0.084779591,0.00608739,0.263291741,0.120460432,0.012396337,0.002816003,0.026324102,2.14,6.84,1.21,18.78157892
B14_531,B14,"Scheepers, R. & Poujol, M. 2002. U-Pb zircon age of Cape Granite Suite ignimbrites: characteristics of the last phases of the Saldanian magmatism. South African Journal of Geology, 105, 163–178, https://doi.org/10.2113/105.2.163.",Natural s-type granite,-1,-1,-1,-1,-1,-1,-1,-1,-1,74.91,0.21,13.38,2,0.21,0.97,2.76,5.55,2,20,47,0.5,Natural,Natural,Natural,Natural,Natural,Nat,1.246821195,0.089056247,0.005267235,0.262545178,0.117833107,0.017306102,0.002658112,0.027860607,2.21,5.15,1.17,15.8997235
B15_532,B15,"Scheepers, R. & Poujol, M. 2002. U-Pb zircon age of Cape Granite Suite ignimbrites: characteristics of the last phases of the Saldanian magmatism. South African Journal of Geology, 105, 163–178, https://doi.org/10.2113/105.2.163.",Natural s-type granite,-1,-1,-1,-1,-1,-1,-1,-1,-1,74.46,0.22,13.54,2.02,0.22,1.07,2.74,5.72,2,20,47,0.5,Natural,Natural,Natural,Natural,Natural,Nat,1.239428473,0.088296708,0.00551137,0.265594034,0.121549036,0.019085668,0.002781315,0.02810793,2.24,4.63,1.16,16.39347119
B16_533,B16,"Scheepers, R. & Poujol, M. 2002. U-Pb zircon age of Cape Granite Suite ignimbrites: characteristics of the last phases of the Saldanian magmatism. South African Journal of Geology, 105, 163–178, https://doi.org/10.2113/105.2.163.",Natural s-type granite,-1,-1,-1,-1,-1,-1,-1,-1,-1,74.66,0.23,13.5,2.02,0.23,1.07,2.74,5.56,2,20,47,0.5,Natural,Natural,Natural,Natural,Natural,Nat,1.242714721,0.08849876,0.005585818,0.264765568,0.117976488,0.019160991,0.002818885,0.028060297,2.24,4.62,1.17,16.60167242
B25_534,B25,"Scheepers, R. & Poujol, M. 2002. U-Pb zircon age of Cape Granite Suite ignimbrites: characteristics of the last phases of the Saldanian magmatism. South African Journal of Geology, 105, 163–178, https://doi.org/10.2113/105.2.163.",Natural s-type granite,-1,-1,-1,-1,-1,-1,-1,-1,-1,75.08,0.23,13.48,1.96,0.27,0.73,2.6,5.66,2,20,47,0.5,Natural,Natural,Natural,Natural,Natural,Nat,1.249608066,0.08387973,0.00657585,0.264339836,0.120116611,0.01308807,0.0029356,0.027242171,2.22,6.41,1.22,19.44480948
B1_535,B1,"Scheepers, R. & Poujol, M. 2002. U-Pb zircon age of Cape Granite Suite ignimbrites: characteristics of the last phases of the Saldanian magmatism. South African Journal of Geology, 105, 163–178, https://doi.org/10.2113/105.2.163.",Natural s-type granite,-1,-1,-1,-1,-1,-1,-1,-1,-1,75.08,0.24,13.67,2.08,0.2,0.98,2.1,5.66,2,20,47,0.5,Natural,Natural,Natural,Natural,Natural,Nat,1.249622231,0.067850765,0.004858921,0.268091116,0.120140702,0.017461215,0.002968278,0.028980081,2.28,3.89,1.3,14.35893798
B24_536,B24,"Scheepers, R. & Poujol, M. 2002. U-Pb zircon age of Cape Granite Suite ignimbrites: characteristics of the last phases of the Saldanian magmatism. South African Journal of Geology, 105, 163–178, https://doi.org/10.2113/105.2.163.",Natural s-type granite,-1,-1,-1,-1,-1,-1,-1,-1,-1,74.33,0.22,13.62,2.03,0.25,0.95,2.77,5.82,2,20,47,0.5,Natural,Natural,Natural,Natural,Natural,Nat,1.237189699,0.089381534,0.006293422,0.267086533,0.123648909,0.017007453,0.00279486,0.028244819,2.28,5.26,1.16,18.2216054
B2_537,B2,"Scheepers, R. & Poujol, M. 2002. U-Pb zircon age of Cape Granite Suite ignimbrites: characteristics of the last phases of the Saldanian magmatism. South African Journal of Geology, 105, 163–178, https://doi.org/10.2113/105.2.163.",Natural s-type granite,-1,-1,-1,-1,-1,-1,-1,-1,-1,74.43,0.26,13.9,2.22,0.21,1.18,2.03,5.77,2,20,47,0.5,Natural,Natural,Natural,Natural,Natural,Nat,1.238863721,0.065403388,0.005157715,0.272590905,0.122476245,0.021129867,0.003253553,0.03096015,2.43,3.1,1.3,14.28023172
B3_538,B3,"Scheepers, R. & Poujol, M. 2002. U-Pb zircon age of Cape Granite Suite ignimbrites: characteristics of the last phases of the Saldanian magmatism. South African Journal of Geology, 105, 163–178, https://doi.org/10.2113/105.2.163.",Natural s-type granite,-1,-1,-1,-1,-1,-1,-1,-1,-1,74.22,0.27,13.97,2.34,0.22,1.26,2.01,5.71,2,20,47,0.5,Natural,Natural,Natural,Natural,Natural,Nat,1.235317288,0.064971192,0.005379813,0.274030145,0.121228463,0.022463237,0.003361335,0.032623889,2.56,2.89,1.31,14.15602444
B13_539,B13,"Scheepers, R. & Poujol, M. 2002. U-Pb zircon age of Cape Granite Suite ignimbrites: characteristics of the last phases of the Saldanian magmatism. South African Journal of Geology, 105, 163–178, https://doi.org/10.2113/105.2.163.",Natural s-type granite,-1,-1,-1,-1,-1,-1,-1,-1,-1,73.7,0.27,13.83,2.3,0.24,1.19,2.79,5.67,2,20,47,0.5,Natural,Natural,Natural,Natural,Natural,Nat,1.226629385,0.090187873,0.006008157,0.271343953,0.120392084,0.021231304,0.003411021,0.032020408,2.54,4.25,1.17,15.79906398
B12_540,B12,"Scheepers, R. & Poujol, M. 2002. U-Pb zircon age of Cape Granite Suite ignimbrites: characteristics of the last phases of the Saldanian magmatism. South African Journal of Geology, 105, 163–178, https://doi.org/10.2113/105.2.163.",Natural s-type granite,-1,-1,-1,-1,-1,-1,-1,-1,-1,73.71,0.27,13.83,2.29,0.25,1.17,2.79,5.69,2,20,47,0.5,Natural,Natural,Natural,Natural,Natural,Nat,1.226871649,0.089955367,0.00631071,0.271212868,0.12074845,0.020864147,0.003439478,0.031862708,2.54,4.31,1.17,16.53168688
B10_541,B10,"Scheepers, R. & Poujol, M. 2002. U-Pb zircon age of Cape Granite Suite ignimbrites: characteristics of the last phases of the Saldanian magmatism. South African Journal of Geology, 105, 163–178, https://doi.org/10.2113/105.2.163.",Natural s-type granite,-1,-1,-1,-1,-1,-1,-1,-1,-1,73.6,0.27,13.88,2.28,0.27,1.2,2.83,5.66,2,20,47,0.5,Natural,Natural,Natural,Natural,Natural,Nat,1.225103449,0.091225637,0.006787943,0.272299966,0.120259045,0.021321659,0.003425537,0.031733565,2.55,4.28,1.17,17.62117563
B11_542,B11,"Scheepers, R. & Poujol, M. 2002. U-Pb zircon age of Cape Granite Suite ignimbrites: characteristics of the last phases of the Saldanian magmatism. South African Journal of Geology, 105, 163–178, https://doi.org/10.2113/105.2.163.",Natural s-type granite,-1,-1,-1,-1,-1,-1,-1,-1,-1,73.62,0.26,13.87,2.29,0.28,1.16,2.81,5.7,2,20,47,0.5,Natural,Natural,Natural,Natural,Natural,Nat,1.225335242,0.090815844,0.007032934,0.272051869,0.121009221,0.02076065,0.00329566,0.031845562,2.57,4.37,1.17,18.08952218
B30_543,B30,"Scheepers, R. & Poujol, M. 2002. U-Pb zircon age of Cape Granite Suite ignimbrites: characteristics of the last phases of the Saldanian magmatism. South African Journal of Geology, 105, 163–178, https://doi.org/10.2113/105.2.163.",Natural s-type granite,-1,-1,-1,-1,-1,-1,-1,-1,-1,72.94,0.33,13.97,2.72,0.38,1.36,2.89,5.4,2,20,47,0.5,Natural,Natural,Natural,Natural,Natural,Nat,1.214097172,0.093174572,0.009518678,0.274082798,0.114677547,0.024304765,0.004171551,0.037801349,3.1,3.83,1.18,20.11553884
B4_544,B4,"Scheepers, R. & Poujol, M. 2002. U-Pb zircon age of Cape Granite Suite ignimbrites: characteristics of the last phases of the Saldanian magmatism. South African Journal of Geology, 105, 163–178, https://doi.org/10.2113/105.2.163.",Natural s-type granite,-1,-1,-1,-1,-1,-1,-1,-1,-1,72.68,0.35,14.58,2.84,0.33,1.51,2.06,5.66,2,20,47,0.5,Natural,Natural,Natural,Natural,Natural,Nat,1.209680353,0.066540933,0.008185978,0.285971412,0.120177863,0.026843431,0.004389247,0.039465284,3.17,2.48,1.34,17.17893181
B5_545,B5,"Scheepers, R. & Poujol, M. 2002. U-Pb zircon age of Cape Granite Suite ignimbrites: characteristics of the last phases of the Saldanian magmatism. South African Journal of Geology, 105, 163–178, https://doi.org/10.2113/105.2.163.",Natural s-type granite,-1,-1,-1,-1,-1,-1,-1,-1,-1,72.67,0.35,14.57,2.86,0.35,1.54,2.12,5.55,2,20,47,0.5,Natural,Natural,Natural,Natural,Natural,Nat,1.209476691,0.06826076,0.008704781,0.285802664,0.117867148,0.027417623,0.00439287,0.03978512,3.21,2.49,1.34,17.9517406
B23_546,B23,"Scheepers, R. & Poujol, M. 2002. U-Pb zircon age of Cape Granite Suite ignimbrites: characteristics of the last phases of the Saldanian magmatism. South African Journal of Geology, 105, 163–178, https://doi.org/10.2113/105.2.163.",Natural s-type granite,-1,-1,-1,-1,-1,-1,-1,-1,-1,71.77,0.38,14.52,2.95,0.4,1.52,2.94,5.53,2,20,47,0.5,Natural,Natural,Natural,Natural,Natural,Nat,1.194601357,0.094899241,0.009846711,0.284841449,0.117316194,0.027038179,0.004714318,0.041075848,3.35,3.51,1.19,19.33663819
B22_547,B22,"Scheepers, R. & Poujol, M. 2002. U-Pb zircon age of Cape Granite Suite ignimbrites: characteristics of the last phases of the Saldanian magmatism. South African Journal of Geology, 105, 163–178, https://doi.org/10.2113/105.2.163.",Natural s-type granite,-1,-1,-1,-1,-1,-1,-1,-1,-1,71.86,0.38,14.41,2.96,0.39,1.47,2.89,5.63,2,20,47,0.5,Natural,Natural,Natural,Natural,Natural,Nat,1.196116771,0.093174572,0.00976917,0.282598376,0.11960761,0.026285153,0.004803604,0.04117396,3.35,3.54,1.18,19.17661916
B21_548,B21,"Scheepers, R. & Poujol, M. 2002. U-Pb zircon age of Cape Granite Suite ignimbrites: characteristics of the last phases of the Saldanian magmatism. South African Journal of Geology, 105, 163–178, https://doi.org/10.2113/105.2.163.",Natural s-type granite,-1,-1,-1,-1,-1,-1,-1,-1,-1,71.69,0.38,14.49,3,0.38,1.46,2.92,5.67,2,20,47,0.5,Natural,Natural,Natural,Natural,Natural,Nat,1.193190224,0.094199479,0.009523486,0.284326196,0.120311394,0.026118302,0.00480603,0.04175714,3.38,3.61,1.18,18.57131347
Melt_es_19_23,NA,NA,Modelled melt extract,19,23,0,0,2,0,0,7,684,74.81223419,0,15.39453443,0.171930142,0.063342684,0.347253642,5.812822369,3.397882545,2,1,7,1,20,20,Excess,Isobaric,1->1,Low,1.245210289,0.187574114,0.001571607,0.301972037,0.07214188,0.006192399,0,0.002393104,0.24,30.29,1.14,39.63989357
Melt_es_20_23,NA,NA,Modelled melt extract,20,23,0,0,2,0,1,7,684,74.81223419,0,15.39453443,0.171930142,0.063342684,0.347253642,5.812822369,3.397882545,2,1,14,1,20,20,Excess,Isobaric,7->1,Low,1.245210289,0.187574114,0.001571607,0.301972037,0.07214188,0.006192399,0,0.002393104,0.24,30.29,1.14,39.63989357
Melt_es_22_23,NA,NA,Modelled melt extract,22,23,0,0,2,1,0,7.392857146,684,74.57619421,0,15.55563125,0.174858921,0.06472051,0.354259631,6.19954355,3.074791929,2,1,28,1,20,20,Excess,Gentle,1->1,Low,1.241281528,0.200053229,0.001605793,0.305132037,0.065282207,0.006317333,0,0.00243387,0.24,31.67,1.12,39.75066709
Melt_es_23_23,NA,NA,Modelled melt extract,23,23,0,0,2,1,1,7.392857146,684,74.57619421,0,15.55563125,0.174858921,0.06472051,0.354259631,6.19954355,3.074791929,2,1,35,1,20,20,Excess,Gentle,7->1,Low,1.241281528,0.200053229,0.001605793,0.305132037,0.065282207,0.006317333,0,0.00243387,0.24,31.67,1.12,39.75066709
Melt_es_25_23,NA,NA,Modelled melt extract,25,23,0,0,2,2,0,7.785714292,684,74.33343234,0,15.67319336,0.181635404,0.067399301,0.36555553,6.406360666,2.972423405,2,1,43,1,20,20,Excess,Steep,1->1,Low,1.237240884,0.206727016,0.001672257,0.307438081,0.063108777,0.006518767,0,0.002528192,0.25,31.71,1.11,39.8113847
Melt_es_100_23,NA,NA,Modelled melt extract,100,23,1,0,2,0,0,7,684,74.81223419,0,15.39453443,0.171930142,0.063342684,0.347253642,5.812822369,3.397882545,2,1,7,1,42,20,Excess,Isobaric,1->1,Low,1.245210289,0.187574114,0.001571607,0.301972037,0.07214188,0.006192399,0,0.002393104,0.24,30.29,1.14,39.63989357
Melt_es_181_23,NA,NA,Modelled melt extract,181,23,2,0,2,0,0,7,684,74.85747896,0,15.40584562,0.113111936,0.063342684,0.347253642,5.813953488,3.399013664,1533,1,7,1,60,20,Excess,Isobaric,1->1,Low,1.245963365,0.187610614,0.001571607,0.302193912,0.072165895,0.006192399,0,0.00157441,0.18,30.3,1.14,49.95544907
Melt_es_19_24,NA,NA,Modelled melt extract,19,24,0,0,2,0,0,7,686,74.76445239,0,15.38270125,0.171924308,0.063340535,0.346110778,5.681419733,3.590051012,2,1,7,1,20,20,Excess,Isobaric,1->1,Low,1.244414986,0.183333879,0.001571554,0.301739922,0.07622189,0.006172019,0,0.002393022,0.24,29.7,1.14,39.63989357
Melt_es_20_24,NA,NA,Modelled melt extract,20,24,0,0,2,0,1,7,686,74.76445239,0,15.38270125,0.171924308,0.063340535,0.346110778,5.681419733,3.590051012,2,1,14,1,20,20,Excess,Isobaric,7->1,Low,1.244414986,0.183333879,0.001571554,0.301739922,0.07622189,0.006172019,0,0.002393022,0.24,29.7,1.14,39.63989357
Melt_es_21_24,NA,NA,Modelled melt extract,21,24,0,0,2,0,2,7,686,74.76445239,0,15.38270125,0.171924308,0.063340535,0.346110778,5.681419733,3.590051012,2,1,21,1,20,20,Excess,Isobaric,10->1,Low,1.244414986,0.183333879,0.001571554,0.301739922,0.07622189,0.006172019,0,0.002393022,0.24,29.7,1.14,39.63989357
Melt_es_22_24,NA,NA,Modelled melt extract,22,24,0,0,2,1,0,7.410714289,686,74.64503504,0,15.50696277,0.177482479,0.065987076,0.358378083,6.136798034,3.109356512,2,1,28,1,20,20,Excess,Gentle,1->1,Low,1.242427348,0.198028493,0.001637218,0.304177379,0.066016062,0.006390776,0,0.002470387,0.24,30.99,1.12,39.85820989
Melt_es_23_24,NA,NA,Modelled melt extract,23,24,0,0,2,1,1,7.410714289,686,74.64503504,0,15.50696277,0.177482479,0.065987076,0.358378083,6.136798034,3.109356512,2,1,35,1,20,20,Excess,Gentle,7->1,Low,1.242427348,0.198028493,0.001637218,0.304177379,0.066016062,0.006390776,0,0.002470387,0.24,30.99,1.12,39.85820989
Melt_es_24_24,NA,NA,Modelled melt extract,24,24,0,0,2,1,2,7.410714289,686,74.64503504,0,15.50696277,0.177482479,0.065987076,0.358378083,6.136798034,3.109356512,2,1,42,1,20,20,Excess,Gentle,10->1,Low,1.242427348,0.198028493,0.001637218,0.304177379,0.066016062,0.006390776,0,0.002470387,0.24,30.99,1.12,39.85820989
Melt_es_25_24,NA,NA,Modelled melt extract,25,24,0,0,2,2,0,7.821428578,686,74.33343234,0,15.67319336,0.181635404,0.067399301,0.36555553,6.406360666,2.972423405,2,1,43,1,20,20,Excess,Steep,1->1,Low,1.237240884,0.206727016,0.001672257,0.307438081,0.063108777,0.006518767,0,0.002528192,0.25,31.71,1.11,39.8113847
Melt_es_26_24,NA,NA,Modelled melt extract,26,24,0,0,2,2,1,7.821428578,686,74.33343234,0,15.67319336,0.181635404,0.067399301,0.36555553,6.406360666,2.972423405,2,1,36,1,20,20,Excess,Steep,7->1,Low,1.237240884,0.206727016,0.001672257,0.307438081,0.063108777,0.006518767,0,0.002528192,0.25,31.71,1.11,39.8113847
Melt_es_27_24,NA,NA,Modelled melt extract,27,24,0,0,2,2,2,7.821428578,686,74.33343234,0,15.67319336,0.181635404,0.067399301,0.36555553,6.406360666,2.972423405,2,1,29,1,20,20,Excess,Steep,10->1,Low,1.237240884,0.206727016,0.001672257,0.307438081,0.063108777,0.006518767,0,0.002528192,0.25,31.71,1.11,39.8113847
Melt_es_100_24,NA,NA,Modelled melt extract,100,24,1,0,2,0,0,7,686,74.76445239,0,15.38270125,0.171924308,0.063340535,0.346110778,5.681419733,3.590051012,2,1,7,1,42,20,Excess,Isobaric,1->1,Low,1.244414986,0.183333879,0.001571554,0.301739922,0.07622189,0.006172019,0,0.002393022,0.24,29.7,1.14,39.63989357
Melt_es_101_24,NA,NA,Modelled melt extract,101,24,1,0,2,0,1,7,686,74.76445239,0,15.38270125,0.171924308,0.063340535,0.346110778,5.681419733,3.590051012,2,1,14,1,42,20,Excess,Isobaric,7->1,Low,1.244414986,0.183333879,0.001571554,0.301739922,0.07622189,0.006172019,0,0.002393022,0.24,29.7,1.14,39.63989357
Melt_es_102_24,NA,NA,Modelled melt extract,102,24,1,0,2,0,2,7,686,74.76445239,0,15.38270125,0.171924308,0.063340535,0.346110778,5.681419733,3.590051012,2,1,21,1,42,20,Excess,Isobaric,10->1,Low,1.244414986,0.183333879,0.001571554,0.301739922,0.07622189,0.006172019,0,0.002393022,0.24,29.7,1.14,39.63989357
Melt_es_103_24,NA,NA,Modelled melt extract,103,24,1,0,2,1,0,7.410714289,686,74.64503504,0,15.50696277,0.177482479,0.065987076,0.358378083,6.136798034,3.109356512,2,1,28,1,42,20,Excess,Gentle,1->1,Low,1.242427348,0.198028493,0.001637218,0.304177379,0.066016062,0.006390776,0,0.002470387,0.24,30.99,1.12,39.85820989
Melt_es_104_24,NA,NA,Modelled melt extract,104,24,1,0,2,1,1,7.410714289,686,74.64503504,0,15.50696277,0.177482479,0.065987076,0.358378083,6.136798034,3.109356512,2,1,35,1,42,20,Excess,Gentle,7->1,Low,1.242427348,0.198028493,0.001637218,0.304177379,0.066016062,0.006390776,0,0.002470387,0.24,30.99,1.12,39.85820989
Melt_es_106_24,NA,NA,Modelled melt extract,106,24,1,0,2,2,0,7.821428578,686,74.38337541,0,15.68551289,0.181645779,0.067403151,0.366718837,6.546102613,2.769241315,2,1,43,1,42,20,Excess,Steep,1->1,Low,1.238072161,0.211236353,0.001672352,0.307679735,0.058794932,0.006539512,0,0.002528336,0.25,32.3,1.11,39.8113847
Melt_es_181_24,NA,NA,Modelled melt extract,181,24,2,0,2,0,0,7,686,74.85747896,0,15.40584562,0.113111936,0.063342684,0.347253642,5.813953488,3.399013664,1534,1,7,1,60,20,Excess,Isobaric,1->1,Low,1.245963365,0.187610614,0.001571607,0.302193912,0.072165895,0.006192399,0,0.00157441,0.18,30.3,1.14,49.95544907
Melt_es_182_24,NA,NA,Modelled melt extract,182,24,2,0,2,0,1,7,686,74.85747896,0,15.40584562,0.113111936,0.063342684,0.347253642,5.813953488,3.399013664,1634,1,14,1,60,20,Excess,Isobaric,7->1,Low,1.245963365,0.187610614,0.001571607,0.302193912,0.072165895,0.006192399,0,0.00157441,0.18,30.3,1.14,49.95544907
Melt_es_183_24,NA,NA,Modelled melt extract,183,24,2,0,2,0,2,7,686,74.85747896,0,15.40584562,0.113111936,0.063342684,0.347253642,5.813953488,3.399013664,1646,1,21,1,60,20,Excess,Isobaric,10->1,Low,1.245963365,0.187610614,0.001571607,0.302193912,0.072165895,0.006192399,0,0.00157441,0.18,30.3,1.14,49.95544907
Melt_es_184_24,NA,NA,Modelled melt extract,184,24,2,0,2,1,0,7.410714289,686,74.69054337,0,15.51833986,0.117183945,0.065987076,0.358378083,6.13907345,3.11049422,1656,1,28,1,60,20,Excess,Gentle,1->1,Low,1.24318481,0.198101918,0.001637218,0.304400546,0.066040217,0.006390776,0,0.001631089,0.18,31,1.13,50.09376189
Melt_es_187_24,NA,NA,Modelled melt extract,187,24,2,0,2,2,0,7.821428578,686,74.4307731,0,15.69729582,0.119957501,0.067404691,0.366727217,6.547394637,2.770447042,1783,1,43,1,60,20,Excess,Steep,1->1,Low,1.23886107,0.211278045,0.00167239,0.307910863,0.058820532,0.006539662,0,0.001669694,0.19,32.31,1.11,50.04033877
Melt_es_19_25,NA,NA,Modelled melt extract,19,25,0,0,2,0,0,7,688,74.95710286,0,15.2284837,0.169330805,0.063216834,0.343177097,5.495349047,3.743339655,2,1,7,1,20,20,Excess,Isobaric,1->1,Low,1.247621552,0.177329559,0.001568485,0.298714863,0.079476426,0.006119704,0,0.002356923,0.23,28.98,1.14,39.95723873
Melt_es_20_25,NA,NA,Modelled melt extract,20,25,0,0,2,0,1,7,688,74.95710286,0,15.2284837,0.169330805,0.063216834,0.343177097,5.495349047,3.743339655,2,1,14,1,20,20,Excess,Isobaric,7->1,Low,1.247621552,0.177329559,0.001568485,0.298714863,0.079476426,0.006119704,0,0.002356923,0.23,28.98,1.14,39.95723873
Melt_es_22_25,NA,NA,Modelled melt extract,22,25,0,0,2,1,0,7.428571432,688,74.67329723,0,15.52051046,0.174847009,0.064716101,0.354235498,5.939121451,3.27327225,2,1,28,1,20,20,Excess,Gentle,1->1,Low,1.242897757,0.191649662,0.001605683,0.304443124,0.069496226,0.006316903,0,0.002433704,0.24,30.34,1.14,39.75066709
Melt_es_23_25,NA,NA,Modelled melt extract,23,25,0,0,2,1,1,7.428571432,688,74.67329723,0,15.52051046,0.174847009,0.064716101,0.354235498,5.939121451,3.27327225,2,1,35,1,20,20,Excess,Gentle,7->1,Low,1.242897757,0.191649662,0.001605683,0.304443124,0.069496226,0.006316903,0,0.002433704,0.24,30.34,1.14,39.75066709
Melt_es_24_25,NA,NA,Modelled melt extract,24,25,0,0,2,1,2,7.428571432,688,74.67329723,0,15.52051046,0.174847009,0.064716101,0.354235498,5.939121451,3.27327225,2,1,42,1,20,20,Excess,Gentle,10->1,Low,1.242897757,0.191649662,0.001605683,0.304443124,0.069496226,0.006316903,0,0.002433704,0.24,30.34,1.14,39.75066709
Melt_es_25_25,NA,NA,Modelled melt extract,25,25,0,0,2,2,0,7.857142864,688,74.66267552,0,15.46951226,0.181658231,0.067407771,0.366743976,6.276920265,2.975081975,2,1,43,1,20,20,Excess,Steep,1->1,Low,1.242720964,0.202550101,0.001672467,0.303442767,0.063165222,0.00653996,0,0.002528509,0.25,30.97,1.11,39.8113847
Melt_es_26_25,NA,NA,Modelled melt extract,26,25,0,0,2,2,1,7.857142864,688,74.66267552,0,15.46951226,0.181658231,0.067407771,0.366743976,6.276920265,2.975081975,2,1,36,1,20,20,Excess,Steep,7->1,Low,1.242720964,0.202550101,0.001672467,0.303442767,0.063165222,0.00653996,0,0.002528509,0.25,30.97,1.11,39.8113847
Melt_es_100_25,NA,NA,Modelled melt extract,100,25,1,0,2,0,0,7,688,74.95710286,0,15.2284837,0.169330805,0.063216834,0.343177097,5.495349047,3.743339655,2,1,7,1,42,20,Excess,Isobaric,1->1,Low,1.247621552,0.177329559,0.001568485,0.298714863,0.079476426,0.006119704,0,0.002356923,0.23,28.98,1.14,39.95723873
Melt_es_101_25,NA,NA,Modelled melt extract,101,25,1,0,2,0,1,7,688,74.95710286,0,15.2284837,0.169330805,0.063216834,0.343177097,5.495349047,3.743339655,2,1,14,1,42,20,Excess,Isobaric,7->1,Low,1.247621552,0.177329559,0.001568485,0.298714863,0.079476426,0.006119704,0,0.002356923,0.23,28.98,1.14,39.95723873
Melt_es_103_25,NA,NA,Modelled melt extract,103,25,1,0,2,1,0,7.428571432,688,74.67329723,0,15.52051046,0.174847009,0.064716101,0.354235498,5.939121451,3.27327225,2,1,28,1,42,20,Excess,Gentle,1->1,Low,1.242897757,0.191649662,0.001605683,0.304443124,0.069496226,0.006316903,0,0.002433704,0.24,30.34,1.14,39.75066709
Melt_es_105_25,NA,NA,Modelled melt extract,105,25,1,0,2,1,2,7.428571432,688,74.67329723,0,15.52051046,0.174847009,0.064716101,0.354235498,5.939121451,3.27327225,2,1,42,1,42,20,Excess,Gentle,10->1,Low,1.242897757,0.191649662,0.001605683,0.304443124,0.069496226,0.006316903,0,0.002433704,0.24,30.34,1.14,39.75066709
Melt_es_106_25,NA,NA,Modelled melt extract,106,25,1,0,2,2,0,7.857142864,688,74.49506489,0,15.63927984,0.181639554,0.067400841,0.366706269,6.276274904,2.973633705,2,1,43,1,42,20,Excess,Steep,1->1,Low,1.239931173,0.202529275,0.001672295,0.306772849,0.063134474,0.006539288,0,0.002528249,0.25,30.97,1.13,39.8113847
Melt_es_107_25,NA,NA,Modelled melt extract,107,25,1,0,2,2,1,7.857142864,688,74.49506489,0,15.63927984,0.181639554,0.067400841,0.366706269,6.276274904,2.973633705,2,1,36,1,42,20,Excess,Steep,7->1,Low,1.239931173,0.202529275,0.001672295,0.306772849,0.063134474,0.006539288,0,0.002528249,0.25,30.97,1.13,39.8113847
Melt_es_181_25,NA,NA,Modelled melt extract,181,25,2,0,2,0,0,7,688,75.01778074,0,15.2293433,0.112893575,0.063220402,0.343196469,5.51485115,3.718714368,1535,1,7,1,60,20,Excess,Isobaric,1->1,Low,1.248631504,0.177958873,0.001568573,0.298731724,0.078953596,0.00612005,0,0.001571371,0.18,29.08,1.14,49.95544907
Melt_es_182_25,NA,NA,Modelled melt extract,182,25,2,0,2,0,1,7,688,75.01693385,0,15.22917137,0.112892301,0.063219688,0.343192594,5.512531045,3.722059156,1635,1,14,1,60,20,Excess,Isobaric,7->1,Low,1.248617408,0.177884005,0.001568556,0.298728352,0.079024611,0.00611998,0,0.001571353,0.18,29.07,1.14,49.95544907
Melt_es_184_25,NA,NA,Modelled melt extract,184,25,2,0,2,1,0,7.428571432,688,74.72719634,0,15.52227282,0.115820909,0.064723449,0.354275722,5.940931336,3.274779429,1657,1,28,1,60,20,Excess,Gentle,1->1,Low,1.243794879,0.191708065,0.001605866,0.304477694,0.069528226,0.00631762,0,0.001612117,0.18,30.34,1.14,49.90287293
Melt_es_185_25,NA,NA,Modelled melt extract,185,25,2,0,2,1,1,7.428571432,688,74.72719634,0,15.52227282,0.115820909,0.064723449,0.354275722,5.940931336,3.274779429,1758,1,35,1,60,20,Excess,Gentle,7->1,Low,1.243794879,0.191708065,0.001605866,0.304477694,0.069528226,0.00631762,0,0.001612117,0.18,30.34,1.14,49.90287293
Melt_es_186_25,NA,NA,Modelled melt extract,186,25,2,0,2,1,2,7.428571432,688,74.72719634,0,15.52227282,0.115820909,0.064723449,0.354275722,5.940931336,3.274779429,1772,1,42,1,60,20,Excess,Gentle,10->1,Low,1.243794879,0.191708065,0.001605866,0.304477694,0.069528226,0.00631762,0,0.001612117,0.18,30.34,1.14,49.90287293
Melt_es_187_25,NA,NA,Modelled melt extract,187,25,2,0,2,2,0,7.857142864,688,74.5509803,0,15.64142407,0.119967095,0.067410082,0.366756547,6.278277958,2.97518395,1784,1,43,1,60,20,Excess,Steep,1->1,Low,1.240861856,0.202593912,0.001672524,0.306814909,0.063167387,0.006540185,0,0.001669828,0.19,30.98,1.13,50.04033877
Melt_es_188_25,NA,NA,Modelled melt extract,188,25,2,0,2,2,1,7.857142864,688,74.5509803,0,15.64142407,0.119967095,0.067410082,0.366756547,6.278277958,2.97518395,1874,1,36,1,60,20,Excess,Steep,7->1,Low,1.240861856,0.202593912,0.001672524,0.306814909,0.063167387,0.006540185,0,0.001669828,0.19,30.98,1.13,50.04033877
Melt_es_19_26,NA,NA,Modelled melt extract,19,26,0,0,2,0,0,7,690,74.67067017,0,15.41952161,0.169321248,0.063213266,0.571177008,5.365225931,3.740870763,2,1,7,1,20,20,Excess,Isobaric,1->1,Low,1.242854031,0.173130613,0.001568396,0.302462174,0.079424008,0.010185512,0,0.00235679,0.23,17,1.15,39.95723873
Melt_es_20_26,NA,NA,Modelled melt extract,20,26,0,0,2,0,1,7,690,74.67067017,0,15.41952161,0.169321248,0.063213266,0.571177008,5.365225931,3.740870763,2,1,14,1,20,20,Excess,Isobaric,7->1,Low,1.242854031,0.173130613,0.001568396,0.302462174,0.079424008,0.010185512,0,0.00235679,0.23,17,1.15,39.95723873
Melt_es_21_26,NA,NA,Modelled melt extract,21,26,0,0,2,0,2,7,690,74.67067017,0,15.41952161,0.169321248,0.063213266,0.571177008,5.365225931,3.740870763,2,1,21,1,20,20,Excess,Isobaric,10->1,Low,1.242854031,0.173130613,0.001568396,0.302462174,0.079424008,0.010185512,0,0.00235679,0.23,17,1.15,39.95723873
Melt_es_22_26,NA,NA,Modelled melt extract,22,26,0,0,2,1,0,7.446428575,690,74.36843599,0,15.72523418,0.174850979,0.06471757,0.590405904,5.805279591,3.271075788,2,1,28,1,20,20,Excess,Gentle,1->1,Low,1.237823502,0.187330716,0.00160572,0.308458889,0.069449592,0.010528411,0,0.002433759,0.24,17.79,1.15,39.75066709
Melt_es_25_26,NA,NA,Modelled melt extract,25,26,0,0,2,2,0,7.89285715,690,74.24083531,0,15.7076418,0.178962247,0.066113442,0.603000182,6.064198432,3.139248587,2,1,43,1,20,20,Excess,Steep,1->1,Low,1.235699656,0.195685774,0.001640353,0.308113805,0.066650713,0.010752998,0,0.002490984,0.25,18.2,1.13,39.70513694
Melt_es_27_26,NA,NA,Modelled melt extract,27,26,0,0,2,2,2,7.89285715,690,74.24083531,0,15.7076418,0.178962247,0.066113442,0.603000182,6.064198432,3.139248587,2,1,29,1,20,20,Excess,Steep,10->1,Low,1.235699656,0.195685774,0.001640353,0.308113805,0.066650713,0.010752998,0,0.002490984,0.25,18.2,1.13,39.70513694
Melt_es_52_26,NA,NA,Modelled melt extract,52,26,0,1,2,2,0,7.89285715,690,74.18171043,0,15.70477753,0.178929613,0.066101386,0.602890226,5.926331145,3.339259664,2,19,43,1,20,32,Excess,Steep,1->1,Low,1.234715553,0.191236931,0.001640054,0.308057621,0.070897233,0.010751037,0,0.00249053,0.25,17.79,1.13,39.70513694
Melt_es_100_26,NA,NA,Modelled melt extract,100,26,1,0,2,0,0,7,690,74.67067017,0,15.41952161,0.169321248,0.063213266,0.571177008,5.365225931,3.740870763,2,1,7,1,42,20,Excess,Isobaric,1->1,Low,1.242854031,0.173130613,0.001568396,0.302462174,0.079424008,0.010185512,0,0.00235679,0.23,17,1.15,39.95723873
Melt_es_101_26,NA,NA,Modelled melt extract,101,26,1,0,2,0,1,7,690,74.67067017,0,15.41952161,0.169321248,0.063213266,0.571177008,5.365225931,3.740870763,2,1,14,1,42,20,Excess,Isobaric,7->1,Low,1.242854031,0.173130613,0.001568396,0.302462174,0.079424008,0.010185512,0,0.00235679,0.23,17,1.15,39.95723873
Melt_es_102_26,NA,NA,Modelled melt extract,102,26,1,0,2,0,2,7,690,74.67067017,0,15.41952161,0.169321248,0.063213266,0.571177008,5.365225931,3.740870763,2,1,21,1,42,20,Excess,Isobaric,10->1,Low,1.242854031,0.173130613,0.001568396,0.302462174,0.079424008,0.010185512,0,0.00235679,0.23,17,1.15,39.95723873
Melt_es_103_26,NA,NA,Modelled melt extract,103,26,1,0,2,1,0,7.446428575,690,74.36843599,0,15.72523418,0.174850979,0.06471757,0.590405904,5.805279591,3.271075788,2,1,28,1,42,20,Excess,Gentle,1->1,Low,1.237823502,0.187330716,0.00160572,0.308458889,0.069449592,0.010528411,0,0.002433759,0.24,17.79,1.15,39.75066709
Melt_es_104_26,NA,NA,Modelled melt extract,104,26,1,0,2,1,1,7.446428575,690,74.36843599,0,15.72523418,0.174850979,0.06471757,0.590405904,5.805279591,3.271075788,2,1,35,1,42,20,Excess,Gentle,7->1,Low,1.237823502,0.187330716,0.00160572,0.308458889,0.069449592,0.010528411,0,0.002433759,0.24,17.79,1.15,39.75066709
Melt_es_106_26,NA,NA,Modelled melt extract,106,26,1,0,2,2,0,7.89285715,690,74.49506489,0,15.63927984,0.181639554,0.067400841,0.366706269,6.276274904,2.973633705,2,1,43,1,42,20,Excess,Steep,1->1,Low,1.239931173,0.202529275,0.001672295,0.306772849,0.063134474,0.006539288,0,0.002528249,0.25,30.97,1.13,39.8113847
Melt_es_108_26,NA,NA,Modelled melt extract,108,26,1,0,2,2,2,7.89285715,690,74.49506489,0,15.63927984,0.181639554,0.067400841,0.366706269,6.276274904,2.973633705,2,1,29,1,42,20,Excess,Steep,10->1,Low,1.239931173,0.202529275,0.001672295,0.306772849,0.063134474,0.006539288,0,0.002528249,0.25,30.97,1.13,39.8113847
Melt_es_181_26,NA,NA,Modelled melt extract,181,26,2,0,2,0,0,7,690,75.05673286,0,15.24166507,0.112901223,0.063224685,0.343219717,5.62699694,3.555259503,1536,1,7,1,60,20,Excess,Isobaric,1->1,Low,1.249279841,0.181577708,0.001568679,0.298973422,0.075483217,0.006120464,0,0.001571477,0.18,29.67,1.14,49.95544907
Melt_es_183_26,NA,NA,Modelled melt extract,183,26,2,0,2,0,2,7,690,75.05673286,0,15.24166507,0.112901223,0.063224685,0.343219717,5.62699694,3.555259503,1647,1,21,1,60,20,Excess,Isobaric,10->1,Low,1.249279841,0.181577708,0.001568679,0.298973422,0.075483217,0.006120464,0,0.001571477,0.18,29.67,1.14,49.95544907
Melt_es_184_26,NA,NA,Modelled melt extract,184,26,2,0,2,1,0,7.446428575,690,74.72719634,0,15.52227282,0.115820909,0.064723449,0.354275722,5.940931336,3.274779429,1658,1,28,1,60,20,Excess,Gentle,1->1,Low,1.243794879,0.191708065,0.001605866,0.304477694,0.069528226,0.00631762,0,0.001612117,0.18,30.34,1.14,49.90287293
Melt_es_185_26,NA,NA,Modelled melt extract,185,26,2,0,2,1,1,7.446428575,690,74.72719634,0,15.52227282,0.115820909,0.064723449,0.354275722,5.940931336,3.274779429,1759,1,35,1,60,20,Excess,Gentle,7->1,Low,1.243794879,0.191708065,0.001605866,0.304477694,0.069528226,0.00631762,0,0.001612117,0.18,30.34,1.14,49.90287293
Melt_es_187_26,NA,NA,Modelled melt extract,187,26,2,0,2,2,0,7.89285715,690,74.5509803,0,15.64142407,0.119967095,0.067410082,0.366756547,6.278277958,2.97518395,1785,1,43,1,60,20,Excess,Steep,1->1,Low,1.240861856,0.202593912,0.001672524,0.306814909,0.063167387,0.006540185,0,0.001669828,0.19,30.98,1.13,50.04033877
Melt_es_189_26,NA,NA,Modelled melt extract,189,26,2,0,2,2,2,7.89285715,690,74.5509803,0,15.64142407,0.119967095,0.067410082,0.366756547,6.278277958,2.97518395,1888,1,29,1,60,20,Excess,Steep,10->1,Low,1.240861856,0.202593912,0.001672524,0.306814909,0.063167387,0.006540185,0,0.001669828,0.19,30.98,1.13,50.04033877
Melt_es_19_27,NA,NA,Modelled melt extract,19,27,0,0,2,0,0,7,692,74.74462441,0,15.40719002,0.16930978,0.063208985,0.571138326,5.112026638,3.932501834,2,1,7,1,20,20,Excess,Isobaric,1->1,Low,1.24408496,0.164960118,0.00156829,0.302220283,0.083492608,0.010184822,0,0.002356631,0.23,16.2,1.17,39.95723873
Melt_es_22_27,NA,NA,Modelled melt extract,22,27,0,0,2,1,0,7.464285718,692,74.32256014,0,15.71138281,0.17482319,0.064707285,0.589176855,5.670401526,3.4669482,2,1,28,1,20,20,Excess,Gentle,1->1,Low,1.237059922,0.182978332,0.001605465,0.308187187,0.073608242,0.010506494,0,0.002433372,0.24,17.42,1.15,39.75066709
Melt_es_23_27,NA,NA,Modelled melt extract,23,27,0,0,2,1,1,7.464285718,692,74.32256014,0,15.71138281,0.17482319,0.064707285,0.589176855,5.670401526,3.4669482,2,1,35,1,20,20,Excess,Gentle,7->1,Low,1.237059922,0.182978332,0.001605465,0.308187187,0.073608242,0.010506494,0,0.002433372,0.24,17.42,1.15,39.75066709
Melt_es_24_27,NA,NA,Modelled melt extract,24,27,0,0,2,1,2,7.464285718,692,74.32256014,0,15.71138281,0.17482319,0.064707285,0.589176855,5.670401526,3.4669482,2,1,42,1,20,20,Excess,Gentle,10->1,Low,1.237059922,0.182978332,0.001605465,0.308187187,0.073608242,0.010506494,0,0.002433372,0.24,17.42,1.15,39.75066709
Melt_es_25_27,NA,NA,Modelled melt extract,25,27,0,0,2,2,0,7.928571436,692,74.39834924,0,15.6754107,0.178984689,0.066121732,0.603075801,5.936135527,3.141922318,2,1,43,1,20,20,Excess,Steep,1->1,Low,1.238321392,0.191553309,0.001640559,0.307481575,0.06670748,0.010754347,0,0.002491296,0.25,17.81,1.14,39.70513694
Melt_es_26_27,NA,NA,Modelled melt extract,26,27,0,0,2,2,1,7.928571436,692,74.39834924,0,15.6754107,0.178984689,0.066121732,0.603075801,5.936135527,3.141922318,2,1,36,1,20,20,Excess,Steep,7->1,Low,1.238321392,0.191553309,0.001640559,0.307481575,0.06670748,0.010754347,0,0.002491296,0.25,17.81,1.14,39.70513694
Melt_es_46_27,NA,NA,Modelled melt extract,46,27,0,1,2,0,0,7,692,74.74462441,0,15.40719002,0.16930978,0.063208985,0.571138326,5.112026638,3.932501834,2,1,7,1,20,32,Excess,Isobaric,1->1,Low,1.24408496,0.164960118,0.00156829,0.302220283,0.083492608,0.010184822,0,0.002356631,0.23,16.2,1.17,39.95723873
Melt_es_49_27,NA,NA,Modelled melt extract,49,27,0,1,2,1,0,7.464285718,692,74.32256014,0,15.71138281,0.17482319,0.064707285,0.589176855,5.670401526,3.4669482,2,10,28,1,20,32,Excess,Gentle,1->1,Low,1.237059922,0.182978332,0.001605465,0.308187187,0.073608242,0.010506494,0,0.002433372,0.24,17.42,1.15,39.75066709
Melt_es_52_27,NA,NA,Modelled melt extract,52,27,0,1,2,2,0,7.928571436,692,74.50846299,0,15.50122528,0.178947968,0.066108167,0.602952072,5.799281929,3.343021599,2,19,43,1,20,32,Excess,Steep,1->1,Low,1.240154178,0.187137177,0.001640222,0.304064835,0.070977104,0.01075214,0,0.002490785,0.25,17.4,1.13,39.70513694
Melt_es_100_27,NA,NA,Modelled melt extract,100,27,1,0,2,0,0,7,692,74.74462441,0,15.40719002,0.16930978,0.063208985,0.571138326,5.112026638,3.932501834,2,1,7,1,42,20,Excess,Isobaric,1->1,Low,1.24408496,0.164960118,0.00156829,0.302220283,0.083492608,0.010184822,0,0.002356631,0.23,16.2,1.17,39.95723873
Melt_es_101_27,NA,NA,Modelled melt extract,101,27,1,0,2,0,1,7,692,74.74462441,0,15.40719002,0.16930978,0.063208985,0.571138326,5.112026638,3.932501834,2,1,14,1,42,20,Excess,Isobaric,7->1,Low,1.24408496,0.164960118,0.00156829,0.302220283,0.083492608,0.010184822,0,0.002356631,0.23,16.2,1.17,39.95723873
Melt_es_103_27,NA,NA,Modelled melt extract,103,27,1,0,2,1,0,7.464285718,692,74.32256014,0,15.71138281,0.17482319,0.064707285,0.589176855,5.670401526,3.4669482,2,1,28,1,42,20,Excess,Gentle,1->1,Low,1.237059922,0.182978332,0.001605465,0.308187187,0.073608242,0.010506494,0,0.002433372,0.24,17.42,1.15,39.75066709
Melt_es_104_27,NA,NA,Modelled melt extract,104,27,1,0,2,1,1,7.464285718,692,74.32256014,0,15.71138281,0.17482319,0.064707285,0.589176855,5.670401526,3.4669482,2,1,35,1,42,20,Excess,Gentle,7->1,Low,1.237059922,0.182978332,0.001605465,0.308187187,0.073608242,0.010506494,0,0.002433372,0.24,17.42,1.15,39.75066709
Melt_es_106_27,NA,NA,Modelled melt extract,106,27,1,0,2,2,0,7.928571436,692,74.39834924,0,15.6754107,0.178984689,0.066121732,0.603075801,5.936135527,3.141922318,2,1,43,1,42,20,Excess,Steep,1->1,Low,1.238321392,0.191553309,0.001640559,0.307481575,0.06670748,0.010754347,0,0.002491296,0.25,17.81,1.14,39.70513694
Melt_es_107_27,NA,NA,Modelled melt extract,107,27,1,0,2,2,1,7.928571436,692,74.39834924,0,15.6754107,0.178984689,0.066121732,0.603075801,5.936135527,3.141922318,2,1,36,1,42,20,Excess,Steep,7->1,Low,1.238321392,0.191553309,0.001640559,0.307481575,0.06670748,0.010754347,0,0.002491296,0.25,17.81,1.14,39.70513694
Melt_es_127_27,NA,NA,Modelled melt extract,127,27,1,1,2,0,0,7,692,74.74462441,0,15.40719002,0.16930978,0.063208985,0.571138326,5.112026638,3.932501834,2,1,7,1,42,32,Excess,Isobaric,1->1,Low,1.24408496,0.164960118,0.00156829,0.302220283,0.083492608,0.010184822,0,0.002356631,0.23,16.2,1.17,39.95723873
Melt_es_181_27,NA,NA,Modelled melt extract,181,27,2,0,2,0,0,7,692,74.92548099,0,15.43446843,0.112907596,0.063228254,0.343239093,5.756029266,3.364646373,1537,1,7,1,60,20,Excess,Isobaric,1->1,Low,1.247095223,0.185741456,0.001568768,0.302755363,0.071436229,0.00612081,0,0.001571566,0.18,30.35,1.15,49.95544907
Melt_es_184_27,NA,NA,Modelled melt extract,184,27,2,0,2,1,0,7.464285718,692,74.42520579,0,15.72523418,0.115810389,0.06471757,0.590405904,5.806414987,3.272211184,1659,1,28,1,60,20,Excess,Gentle,1->1,Low,1.238768405,0.187367354,0.00160572,0.308458889,0.069473698,0.010528411,0,0.00161197,0.18,17.8,1.15,49.90287293
Melt_es_186_27,NA,NA,Modelled melt extract,186,27,2,0,2,1,2,7.464285718,692,74.37556767,0,15.71298819,0.115803815,0.064713896,0.590372389,5.672116258,3.468437784,1773,1,42,1,60,20,Excess,Gentle,10->1,Low,1.237942205,0.183033665,0.001605629,0.308218678,0.073639868,0.010527813,0,0.001611879,0.18,17.39,1.15,49.90287293
Melt_es_187_27,NA,NA,Modelled melt extract,187,27,2,0,2,2,0,7.928571436,692,74.11924274,0,15.88839372,0.118536079,0.06610666,0.602938327,6.06471614,3.140066335,1786,1,43,1,60,20,Excess,Steep,1->1,Low,1.233675811,0.19570248,0.001640185,0.311659351,0.066668075,0.010751895,0,0.001649909,0.18,18.2,1.14,49.85221466
Melt_es_188_27,NA,NA,Modelled melt extract,188,27,2,0,2,2,1,7.928571436,692,74.11924274,0,15.88839372,0.118536079,0.06610666,0.602938327,6.06471614,3.140066335,1875,1,36,1,60,20,Excess,Steep,7->1,Low,1.233675811,0.19570248,0.001640185,0.311659351,0.066668075,0.010751895,0,0.001649909,0.18,18.2,1.14,49.85221466
Melt_es_208_27,NA,NA,Modelled melt extract,208,27,2,1,2,0,0,7,692,74.66645597,0,15.41865138,0.111745716,0.063209698,0.571144773,5.237374992,3.931417477,2498,1,7,1,60,32,Excess,Isobaric,1->1,Low,1.242783888,0.169004988,0.001568308,0.302445103,0.083469586,0.010184937,0,0.001555394,0.17,16.59,1.15,50.20670628
Melt_es_19_28,NA,NA,Modelled melt extract,19,28,0,0,2,0,0,7,694,74.69610266,0,15.39520762,0.169302137,0.063206131,0.571112541,4.98312622,4.121942686,2,1,7,1,20,20,Excess,Isobaric,1->1,Low,1.243277341,0.160800627,0.001568219,0.301985242,0.087514707,0.010184362,0,0.002356524,0.23,15.79,1.17,39.95723873
Melt_es_20_28,NA,NA,Modelled melt extract,20,28,0,0,2,0,1,7,694,74.69610266,0,15.39520762,0.169302137,0.063206131,0.571112541,4.98312622,4.121942686,2,1,14,1,20,20,Excess,Isobaric,7->1,Low,1.243277341,0.160800627,0.001568219,0.301985242,0.087514707,0.010184362,0,0.002356524,0.23,15.79,1.17,39.95723873
Melt_es_21_28,NA,NA,Modelled melt extract,21,28,0,0,2,0,2,7,694,74.69610266,0,15.39520762,0.169302137,0.063206131,0.571112541,4.98312622,4.121942686,2,1,21,1,20,20,Excess,Isobaric,10->1,Low,1.243277341,0.160800627,0.001568219,0.301985242,0.087514707,0.010184362,0,0.002356524,0.23,15.79,1.17,39.95723873
Melt_es_22_28,NA,NA,Modelled melt extract,22,28,0,0,2,1,0,7.482142861,694,74.52810949,0,15.54462849,0.173347533,0.064580454,0.583490064,5.480274637,3.625569328,2,1,28,1,20,20,Excess,Gentle,1->1,Low,1.240481183,0.176843122,0.001602318,0.304916212,0.076975994,0.010405084,0,0.002412832,0.24,17,1.15,39.90679422
Melt_es_23_28,NA,NA,Modelled melt extract,23,28,0,0,2,1,1,7.482142861,694,74.52810949,0,15.54462849,0.173347533,0.064580454,0.583490064,5.480274637,3.625569328,2,1,35,1,20,20,Excess,Gentle,7->1,Low,1.240481183,0.176843122,0.001602318,0.304916212,0.076975994,0.010405084,0,0.002412832,0.24,17,1.15,39.90679422
Melt_es_25_28,NA,NA,Modelled melt extract,25,28,0,0,2,2,0,7.964285722,694,74.34766253,0,15.66293902,0.178972447,0.06611721,0.603034552,5.798935285,3.342338953,2,1,43,1,20,20,Excess,Steep,1->1,Low,1.237477738,0.187125991,0.001640446,0.307236937,0.07096261,0.010753611,0,0.002491126,0.25,17.4,1.14,39.70513694
Melt_es_27_28,NA,NA,Modelled melt extract,27,28,0,0,2,2,2,7.964285722,694,74.34766253,0,15.66293902,0.178972447,0.06611721,0.603034552,5.798935285,3.342338953,2,1,29,1,20,20,Excess,Steep,10->1,Low,1.237477738,0.187125991,0.001640446,0.307236937,0.07096261,0.010753611,0,0.002491126,0.25,17.4,1.14,39.70513694
Melt_es_46_28,NA,NA,Modelled melt extract,46,28,0,1,2,0,0,7,694,74.69610266,0,15.39520762,0.169302137,0.063206131,0.571112541,4.98312622,4.121942686,2,1,7,1,20,32,Excess,Isobaric,1->1,Low,1.243277341,0.160800627,0.001568219,0.301985242,0.087514707,0.010184362,0,0.002356524,0.23,15.79,1.17,39.95723873
Melt_es_47_28,NA,NA,Modelled melt extract,47,28,0,1,2,0,1,7,694,74.69610266,0,15.39520762,0.169302137,0.063206131,0.571112541,4.98312622,4.121942686,2,1,14,1,20,32,Excess,Isobaric,7->1,Low,1.243277341,0.160800627,0.001568219,0.301985242,0.087514707,0.010184362,0,0.002356524,0.23,15.79,1.17,39.95723873
Melt_es_49_28,NA,NA,Modelled melt extract,49,28,0,1,2,1,0,7.482142861,694,74.52810949,0,15.54462849,0.173347533,0.064580454,0.583490064,5.480274637,3.625569328,2,10,28,1,20,32,Excess,Gentle,1->1,Low,1.240481183,0.176843122,0.001602318,0.304916212,0.076975994,0.010405084,0,0.002412832,0.24,17,1.15,39.90679422
Melt_es_50_28,NA,NA,Modelled melt extract,50,28,0,1,2,1,1,7.482142861,694,74.52810949,0,15.54462849,0.173347533,0.064580454,0.583490064,5.480274637,3.625569328,2,10,35,1,20,32,Excess,Gentle,7->1,Low,1.240481183,0.176843122,0.001602318,0.304916212,0.076975994,0.010405084,0,0.002412832,0.24,17,1.15,39.90679422
Melt_es_52_28,NA,NA,Modelled melt extract,52,28,0,1,2,2,0,7.964285722,694,74.50846299,0,15.50122528,0.178947968,0.066108167,0.602952072,5.799281929,3.343021599,2,19,43,1,20,32,Excess,Steep,1->1,Low,1.240154178,0.187137177,0.001640222,0.304064835,0.070977104,0.01075214,0,0.002490785,0.25,17.4,1.13,39.70513694
Melt_es_53_28,NA,NA,Modelled melt extract,53,28,0,1,2,2,1,7.964285722,694,74.50846299,0,15.50122528,0.178947968,0.066108167,0.602952072,5.799281929,3.343021599,2,19,36,1,20,32,Excess,Steep,7->1,Low,1.240154178,0.187137177,0.001640222,0.304064835,0.070977104,0.01075214,0,0.002490785,0.25,17.4,1.13,39.70513694
Melt_es_100_28,NA,NA,Modelled melt extract,100,28,1,0,2,0,0,7,694,74.69610266,0,15.39520762,0.169302137,0.063206131,0.571112541,4.98312622,4.121942686,2,1,7,1,42,20,Excess,Isobaric,1->1,Low,1.243277341,0.160800627,0.001568219,0.301985242,0.087514707,0.010184362,0,0.002356524,0.23,15.79,1.17,39.95723873
Melt_es_103_28,NA,NA,Modelled melt extract,103,28,1,0,2,1,0,7.482142861,694,74.52810949,0,15.54462849,0.173347533,0.064580454,0.583490064,5.480274637,3.625569328,2,1,28,1,42,20,Excess,Gentle,1->1,Low,1.240481183,0.176843122,0.001602318,0.304916212,0.076975994,0.010405084,0,0.002412832,0.24,17,1.15,39.90679422
Melt_es_104_28,NA,NA,Modelled melt extract,104,28,1,0,2,1,1,7.482142861,694,74.52810949,0,15.54462849,0.173347533,0.064580454,0.583490064,5.480274637,3.625569328,2,1,35,1,42,20,Excess,Gentle,7->1,Low,1.240481183,0.176843122,0.001602318,0.304916212,0.076975994,0.010405084,0,0.002412832,0.24,17,1.15,39.90679422
Melt_es_105_28,NA,NA,Modelled melt extract,105,28,1,0,2,1,2,7.482142861,694,74.52810949,0,15.54462849,0.173347533,0.064580454,0.583490064,5.480274637,3.625569328,2,1,42,1,42,20,Excess,Gentle,10->1,Low,1.240481183,0.176843122,0.001602318,0.304916212,0.076975994,0.010405084,0,0.002412832,0.24,17,1.15,39.90679422
Melt_es_106_28,NA,NA,Modelled melt extract,106,28,1,0,2,2,0,7.964285722,694,74.39834924,0,15.6754107,0.178984689,0.066121732,0.603075801,5.936135527,3.141922318,2,1,43,1,42,20,Excess,Steep,1->1,Low,1.238321392,0.191553309,0.001640559,0.307481575,0.06670748,0.010754347,0,0.002491296,0.25,17.81,1.14,39.70513694
Melt_es_107_28,NA,NA,Modelled melt extract,107,28,1,0,2,2,1,7.964285722,694,74.39834924,0,15.6754107,0.178984689,0.066121732,0.603075801,5.936135527,3.141922318,2,1,36,1,42,20,Excess,Steep,7->1,Low,1.238321392,0.191553309,0.001640559,0.307481575,0.06670748,0.010754347,0,0.002491296,0.25,17.81,1.14,39.70513694
Melt_es_127_28,NA,NA,Modelled melt extract,127,28,1,1,2,0,0,7,694,74.69610266,0,15.39520762,0.169302137,0.063206131,0.571112541,4.98312622,4.121942686,2,1,7,1,42,32,Excess,Isobaric,1->1,Low,1.243277341,0.160800627,0.001568219,0.301985242,0.087514707,0.010184362,0,0.002356524,0.23,15.79,1.17,39.95723873
Melt_es_128_28,NA,NA,Modelled melt extract,128,28,1,1,2,0,1,7,694,74.69610266,0,15.39520762,0.169302137,0.063206131,0.571112541,4.98312622,4.121942686,2,1,14,1,42,32,Excess,Isobaric,7->1,Low,1.243277341,0.160800627,0.001568219,0.301985242,0.087514707,0.010184362,0,0.002356524,0.23,15.79,1.17,39.95723873
Melt_es_130_28,NA,NA,Modelled melt extract,130,28,1,1,2,1,0,7.482142861,694,74.52810949,0,15.54462849,0.173347533,0.064580454,0.583490064,5.480274637,3.625569328,2,10,28,1,42,32,Excess,Gentle,1->1,Low,1.240481183,0.176843122,0.001602318,0.304916212,0.076975994,0.010405084,0,0.002412832,0.24,17,1.15,39.90679422
Melt_es_181_28,NA,NA,Modelled melt extract,181,28,2,0,2,0,0,7,694,74.67455488,0,15.64846282,0.112903772,0.063226112,0.572422125,5.755834302,3.172595996,1538,1,7,1,60,20,Excess,Isobaric,1->1,Low,1.24291869,0.185735164,0.001568715,0.306952978,0.067358726,0.010207715,0,0.001571513,0.18,18.2,1.17,49.95544907
Melt_es_184_28,NA,NA,Modelled melt extract,184,28,2,0,2,1,0,7.482142861,694,74.42520579,0,15.72523418,0.115810389,0.06471757,0.590405904,5.806414987,3.272211184,1660,1,28,1,60,20,Excess,Gentle,1->1,Low,1.238768405,0.187367354,0.00160572,0.308458889,0.069473698,0.010528411,0,0.00161197,0.18,17.8,1.15,49.90287293
Melt_es_187_28,NA,NA,Modelled melt extract,187,28,2,0,2,2,0,7.964285722,694,74.45619955,0,15.6755894,0.118564458,0.066122486,0.603082676,5.937343244,3.14309818,1787,1,43,1,60,20,Excess,Steep,1->1,Low,1.23928428,0.191592281,0.001640577,0.30748508,0.066732445,0.010754469,0,0.001650304,0.18,17.82,1.14,49.85221466
Melt_es_208_28,NA,NA,Modelled melt extract,208,28,2,1,2,0,0,7,694,74.74884298,0,15.39677164,0.111750762,0.063212552,0.571170561,4.98476126,4.123490236,2499,1,7,1,60,32,Excess,Isobaric,1->1,Low,1.244155176,0.160853389,0.001568378,0.302015921,0.087547563,0.010185397,0,0.001555464,0.17,15.79,1.17,50.20670628
Melt_es_209_28,NA,NA,Modelled melt extract,209,28,2,1,2,0,1,7,694,74.74884298,0,15.39677164,0.111750762,0.063212552,0.571170561,4.98476126,4.123490236,2588,1,14,1,60,32,Excess,Isobaric,7->1,Low,1.244155176,0.160853389,0.001568378,0.302015921,0.087547563,0.010185397,0,0.001555464,0.17,15.79,1.17,50.20670628
Melt_es_211_28,NA,NA,Modelled melt extract,211,28,2,1,2,1,0,7.482142861,694,74.58103407,0,15.54621373,0.114443702,0.06458704,0.583549568,5.483099725,3.627072168,2609,10,28,1,60,32,Excess,Gentle,1->1,Low,1.241362085,0.176934285,0.001602481,0.304947307,0.077007902,0.010406145,0,0.001592947,0.18,17,1.15,50.14917977
Melt_es_19_29,NA,NA,Modelled melt extract,19,29,0,0,2,0,0,7,696,74.84173294,0,15.22968437,0.167841936,0.061955077,0.564354428,4.678171537,4.456259716,2,1,7,1,20,20,Excess,Isobaric,1->1,Low,1.245701281,0.150960037,0.001537179,0.298738414,0.094612733,0.010063848,0,0.0023362,0.23,15,1.17,39.68573923
Melt_es_22_29,NA,NA,Modelled melt extract,22,29,0,0,2,1,0,7.500000004,696,74.4785707,0,15.53241868,0.173337714,0.064576795,0.583457011,5.348544756,3.819094339,2,1,28,1,20,20,Excess,Gentle,1->1,Low,1.239656636,0.172592328,0.001602227,0.30467671,0.081084805,0.010404495,0,0.002412696,0.24,16.59,1.15,39.90679422
Melt_es_24_29,NA,NA,Modelled melt extract,24,29,0,0,2,1,2,7.500000004,696,74.4785707,0,15.53241868,0.173337714,0.064576795,0.583457011,5.348544756,3.819094339,2,1,42,1,20,20,Excess,Gentle,10->1,Low,1.239656636,0.172592328,0.001602227,0.30467671,0.081084805,0.010404495,0,0.002412696,0.24,16.59,1.15,39.90679422
Melt_es_25_29,NA,NA,Modelled melt extract,25,29,0,0,2,2,0,8.000000008,696,74.34766253,0,15.66293902,0.178972447,0.06611721,0.603034552,5.798935285,3.342338953,2,1,43,1,20,20,Excess,Steep,1->1,Low,1.237477738,0.187125991,0.001640446,0.307236937,0.07096261,0.010753611,0,0.002491126,0.25,17.4,1.14,39.70513694
Melt_es_26_29,NA,NA,Modelled melt extract,26,29,0,0,2,2,1,8.000000008,696,74.34766253,0,15.66293902,0.178972447,0.06611721,0.603034552,5.798935285,3.342338953,2,1,36,1,20,20,Excess,Steep,7->1,Low,1.237477738,0.187125991,0.001640446,0.307236937,0.07096261,0.010753611,0,0.002491126,0.25,17.4,1.14,39.70513694
Melt_es_46_29,NA,NA,Modelled melt extract,46,29,0,1,2,0,0,7,696,74.84173294,0,15.22968437,0.167841936,0.061955077,0.564354428,4.678171537,4.456259716,2,1,7,1,20,32,Excess,Isobaric,1->1,Low,1.245701281,0.150960037,0.001537179,0.298738414,0.094612733,0.010063848,0,0.0023362,0.23,15,1.17,39.68573923
Melt_es_47_29,NA,NA,Modelled melt extract,47,29,0,1,2,0,1,7,696,74.84173294,0,15.22968437,0.167841936,0.061955077,0.564354428,4.678171537,4.456259716,2,1,14,1,20,32,Excess,Isobaric,7->1,Low,1.245701281,0.150960037,0.001537179,0.298738414,0.094612733,0.010063848,0,0.0023362,0.23,15,1.17,39.68573923
Melt_es_48_29,NA,NA,Modelled melt extract,48,29,0,1,2,0,2,7,696,74.84173294,0,15.22968437,0.167841936,0.061955077,0.564354428,4.678171537,4.456259716,2,1,21,1,20,32,Excess,Isobaric,10->1,Low,1.245701281,0.150960037,0.001537179,0.298738414,0.094612733,0.010063848,0,0.0023362,0.23,15,1.17,39.68573923
Melt_es_49_29,NA,NA,Modelled melt extract,49,29,0,1,2,1,0,7.500000004,696,74.4785707,0,15.53241868,0.173337714,0.064576795,0.583457011,5.348544756,3.819094339,2,10,28,1,20,32,Excess,Gentle,1->1,Low,1.239656636,0.172592328,0.001602227,0.30467671,0.081084805,0.010404495,0,0.002412696,0.24,16.59,1.15,39.90679422
Melt_es_51_29,NA,NA,Modelled melt extract,51,29,0,1,2,1,2,7.500000004,696,74.4785707,0,15.53241868,0.173337714,0.064576795,0.583457011,5.348544756,3.819094339,2,10,42,1,20,32,Excess,Gentle,10->1,Low,1.239656636,0.172592328,0.001602227,0.30467671,0.081084805,0.010404495,0,0.002412696,0.24,16.59,1.15,39.90679422
Melt_es_52_29,NA,NA,Modelled melt extract,52,29,0,1,2,2,0,8.000000008,696,74.29991224,0,15.64868531,0.17893981,0.066105153,0.602924583,5.661108515,3.542324394,2,19,43,1,20,32,Excess,Steep,1->1,Low,1.23668296,0.182678455,0.001640147,0.306957342,0.075208586,0.01075165,0,0.002490672,0.25,16.99,1.14,39.70513694
Melt_es_53_29,NA,NA,Modelled melt extract,53,29,0,1,2,2,1,8.000000008,696,74.34766253,0,15.66293902,0.178972447,0.06611721,0.603034552,5.798935285,3.342338953,2,19,36,1,20,32,Excess,Steep,7->1,Low,1.237477738,0.187125991,0.001640446,0.307236937,0.07096261,0.010753611,0,0.002491126,0.25,17.4,1.14,39.70513694
Melt_es_54_29,NA,NA,Modelled melt extract,54,29,0,1,2,2,2,8.000000008,696,74.34766253,0,15.66293902,0.178972447,0.06611721,0.603034552,5.798935285,3.342338953,2,19,29,1,20,32,Excess,Steep,10->1,Low,1.237477738,0.187125991,0.001640446,0.307236937,0.07096261,0.010753611,0,0.002491126,0.25,17.4,1.14,39.70513694
Melt_es_100_29,NA,NA,Modelled melt extract,100,29,1,0,2,0,0,7,696,74.94168948,0,15.2452422,0.167889216,0.061972529,0.565640176,4.935266876,4.082299519,2,1,7,1,42,20,Excess,Isobaric,1->1,Low,1.247365005,0.159256253,0.001537612,0.29904359,0.086673026,0.010086776,0,0.002336858,0.23,15.79,1.17,39.68573923
Melt_es_101_29,NA,NA,Modelled melt extract,101,29,1,0,2,0,1,7,696,74.89686887,0,15.28369514,0.167940308,0.061991389,0.566939429,4.973963617,4.048601249,2,1,14,1,42,20,Excess,Isobaric,7->1,Low,1.246618989,0.160504959,0.00153808,0.299797865,0.085957564,0.010109945,0,0.002337569,0.23,15.88,1.17,39.68573923
Melt_es_102_29,NA,NA,Modelled melt extract,102,29,1,0,2,0,2,7,696,74.89577465,0,15.23380282,0.167887324,0.061971831,0.564507042,4.806760563,4.269295775,2,1,21,1,42,20,Excess,Isobaric,10->1,Low,1.246600776,0.15510948,0.001537595,0.2988192,0.090643222,0.010066569,0,0.002336832,0.23,15.41,1.17,39.68573923
Melt_es_103_29,NA,NA,Modelled melt extract,103,29,1,0,2,1,0,7.500000004,696,74.59466824,0,15.49797902,0.174848994,0.064716835,0.590399201,5.411235751,3.66615196,2,1,28,1,42,20,Excess,Gentle,1->1,Low,1.241589019,0.174615305,0.001605701,0.304001158,0.077837621,0.010528291,0,0.002433731,0.24,16.59,1.16,39.75066709
Melt_es_106_29,NA,NA,Modelled melt extract,106,29,1,0,2,2,0,8.000000008,696,74.34766253,0,15.66293902,0.178972447,0.06611721,0.603034552,5.798935285,3.342338953,2,1,43,1,42,20,Excess,Steep,1->1,Low,1.237477738,0.187125991,0.001640446,0.307236937,0.07096261,0.010753611,0,0.002491126,0.25,17.4,1.14,39.70513694
Melt_es_108_29,NA,NA,Modelled melt extract,108,29,1,0,2,2,2,8.000000008,696,74.34766253,0,15.66293902,0.178972447,0.06611721,0.603034552,5.798935285,3.342338953,2,1,29,1,42,20,Excess,Steep,10->1,Low,1.237477738,0.187125991,0.001640446,0.307236937,0.07096261,0.010753611,0,0.002491126,0.25,17.4,1.14,39.70513694
Melt_es_127_29,NA,NA,Modelled melt extract,127,29,1,1,2,0,0,7,696,74.89577465,0,15.23380282,0.167887324,0.061971831,0.564507042,4.806760563,4.269295775,2,1,7,1,42,32,Excess,Isobaric,1->1,Low,1.246600776,0.15510948,0.001537595,0.2988192,0.090643222,0.010066569,0,0.002336832,0.23,15.41,1.17,39.68573923
Melt_es_129_29,NA,NA,Modelled melt extract,129,29,1,1,2,0,2,7,696,74.89577465,0,15.23380282,0.167887324,0.061971831,0.564507042,4.806760563,4.269295775,2,1,21,1,42,32,Excess,Isobaric,10->1,Low,1.246600776,0.15510948,0.001537595,0.2988192,0.090643222,0.010066569,0,0.002336832,0.23,15.41,1.17,39.68573923
Melt_es_130_29,NA,NA,Modelled melt extract,130,29,1,1,2,1,0,7.500000004,696,74.59466824,0,15.49797902,0.174848994,0.064716835,0.590399201,5.411235751,3.66615196,2,10,28,1,42,32,Excess,Gentle,1->1,Low,1.241589019,0.174615305,0.001605701,0.304001158,0.077837621,0.010528291,0,0.002433731,0.24,16.59,1.16,39.75066709
Melt_es_133_29,NA,NA,Modelled melt extract,133,29,1,1,2,2,0,8.000000008,696,74.34766253,0,15.66293902,0.178972447,0.06611721,0.603034552,5.798935285,3.342338953,2,19,43,1,42,32,Excess,Steep,1->1,Low,1.237477738,0.187125991,0.001640446,0.307236937,0.07096261,0.010753611,0,0.002491126,0.25,17.4,1.14,39.70513694
Melt_es_181_29,NA,NA,Modelled melt extract,181,29,2,0,2,0,0,7,696,75.09447625,0,15.41037768,0.114276663,0.063361318,0.347355796,5.95370098,3.016451314,1539,1,7,1,60,20,Excess,Isobaric,1->1,Low,1.24990806,0.192120129,0.001572069,0.30228281,0.064043552,0.006194221,0,0.001590622,0.18,31.02,1.15,49.70669415
Melt_es_184_29,NA,NA,Modelled melt extract,184,29,2,0,2,1,0,7.500000004,696,74.47484955,0,15.73748155,0.115816964,0.064721244,0.590439423,5.940728966,3.075962303,1661,1,28,1,60,20,Excess,Gentle,1->1,Low,1.2395947,0.191701535,0.001605811,0.308699128,0.065307055,0.010529009,0,0.001612062,0.18,18.21,1.15,49.90287293
Melt_es_185_29,NA,NA,Modelled melt extract,185,29,2,0,2,1,1,7.500000004,696,74.42520579,0,15.72523418,0.115810389,0.06471757,0.590405904,5.806414987,3.272211184,1760,1,35,1,60,20,Excess,Gentle,7->1,Low,1.238768405,0.187367354,0.00160572,0.308458889,0.069473698,0.010528411,0,0.00161197,0.18,17.8,1.15,49.90287293
Melt_es_187_29,NA,NA,Modelled melt extract,187,29,2,0,2,2,0,8.000000008,696,74.45619955,0,15.6755894,0.118564458,0.066122486,0.603082676,5.937343244,3.14309818,1788,1,43,1,60,20,Excess,Steep,1->1,Low,1.23928428,0.191592281,0.001640577,0.30748508,0.066732445,0.010754469,0,0.001650304,0.18,17.82,1.14,49.85221466
Melt_es_189_29,NA,NA,Modelled melt extract,189,29,2,0,2,2,2,8.000000008,696,74.39702731,0,15.67273059,0.118542835,0.066110427,0.60297269,5.799480235,3.343135914,1889,1,29,1,60,20,Excess,Steep,10->1,Low,1.238299389,0.187143576,0.001640278,0.307429003,0.070979531,0.010752508,0,0.001650003,0.18,17.4,1.14,49.85221466
Melt_es_208_29,NA,NA,Modelled melt extract,208,29,2,1,2,0,0,7,696,74.93746761,0,15.24438335,0.111544268,0.061969038,0.564481601,4.80879735,4.271356784,2500,1,7,1,60,32,Excess,Isobaric,1->1,Low,1.247294734,0.155175205,0.001537525,0.299026743,0.090686981,0.010066116,0,0.00155259,0.17,15.42,1.17,49.75624675
Melt_es_211_29,NA,NA,Modelled melt extract,211,29,2,1,2,1,0,7.500000004,696,74.63923612,0,15.50915676,0.115807759,0.064716101,0.590392497,5.413445054,3.667245705,2610,10,28,1,60,32,Excess,Gentle,1->1,Low,1.242330828,0.174686597,0.001605683,0.304220415,0.077860843,0.010528172,0,0.001611934,0.18,16.59,1.16,49.90287293
Melt_es_214_29,NA,NA,Modelled melt extract,214,29,2,1,2,2,0,8.000000008,696,74.39702731,0,15.67273059,0.118542835,0.066110427,0.60297269,5.799480235,3.343135914,2735,19,43,1,60,32,Excess,Steep,1->1,Low,1.238299389,0.187143576,0.001640278,0.307429003,0.070979531,0.010752508,0,0.001650003,0.18,17.4,1.14,49.85221466
Melt_es_19_30,NA,NA,Modelled melt extract,19,30,0,0,2,0,0,7,698,75.03992083,0,15.06870881,0.165305985,0.061849178,0.558891663,4.507118278,4.598205249,2,1,7,1,20,20,Excess,Isobaric,1->1,Low,1.249000014,0.145440315,0.001534552,0.295580793,0.097626438,0.009966433,0,0.002300902,0.23,14.59,1.17,40.00965233
Melt_es_20_30,NA,NA,Modelled melt extract,20,30,0,0,2,0,1,7,698,75.03992083,0,15.06870881,0.165305985,0.061849178,0.558891663,4.507118278,4.598205249,2,1,14,1,20,20,Excess,Isobaric,7->1,Low,1.249000014,0.145440315,0.001534552,0.295580793,0.097626438,0.009966433,0,0.002300902,0.23,14.59,1.17,40.00965233
Melt_es_22_30,NA,NA,Modelled melt extract,22,30,0,0,2,1,0,7.517857147,698,74.79039202,0,15.34103784,0.173351462,0.064581917,0.583503286,5.224337186,3.822796284,2,1,28,1,20,20,Excess,Gentle,1->1,Low,1.244846738,0.16858427,0.001602354,0.300922672,0.081163403,0.01040532,0,0.002412887,0.24,16.2,1.16,39.90679422
Melt_es_23_30,NA,NA,Modelled melt extract,23,30,0,0,2,1,1,7.517857147,698,74.79039202,0,15.34103784,0.173351462,0.064581917,0.583503286,5.224337186,3.822796284,2,1,35,1,20,20,Excess,Gentle,7->1,Low,1.244846738,0.16858427,0.001602354,0.300922672,0.081163403,0.01040532,0,0.002412887,0.24,16.2,1.16,39.90679422
Melt_es_25_30,NA,NA,Modelled melt extract,25,30,0,0,2,2,0,8.035714294,698,74.29991224,0,15.64868531,0.17893981,0.066105153,0.602924583,5.661108515,3.542324394,2,1,43,1,20,20,Excess,Steep,1->1,Low,1.23668296,0.182678455,0.001640147,0.306957342,0.075208586,0.01075165,0,0.002490672,0.25,16.99,1.14,39.70513694
Melt_es_27_30,NA,NA,Modelled melt extract,27,30,0,0,2,2,2,8.035714294,698,74.34766253,0,15.66293902,0.178972447,0.06611721,0.603034552,5.798935285,3.342338953,2,1,29,1,20,20,Excess,Steep,10->1,Low,1.237477738,0.187125991,0.001640446,0.307236937,0.07096261,0.010753611,0,0.002491126,0.25,17.4,1.14,39.70513694
Melt_es_46_30,NA,NA,Modelled melt extract,46,30,0,1,2,0,0,7,698,75.03992083,0,15.06870881,0.165305985,0.061849178,0.558891663,4.507118278,4.598205249,2,1,7,1,20,32,Excess,Isobaric,1->1,Low,1.249000014,0.145440315,0.001534552,0.295580793,0.097626438,0.009966433,0,0.002300902,0.23,14.59,1.17,40.00965233
Melt_es_49_30,NA,NA,Modelled melt extract,49,30,0,1,2,1,0,7.517857147,698,74.79039202,0,15.34103784,0.173351462,0.064581917,0.583503286,5.224337186,3.822796284,2,10,28,1,20,32,Excess,Gentle,1->1,Low,1.244846738,0.16858427,0.001602354,0.300922672,0.081163403,0.01040532,0,0.002412887,0.24,16.2,1.16,39.90679422
Melt_es_50_30,NA,NA,Modelled melt extract,50,30,0,1,2,1,1,7.517857147,698,74.79039202,0,15.34103784,0.173351462,0.064581917,0.583503286,5.224337186,3.822796284,2,10,35,1,20,32,Excess,Gentle,7->1,Low,1.244846738,0.16858427,0.001602354,0.300922672,0.081163403,0.01040532,0,0.002412887,0.24,16.2,1.16,39.90679422
Melt_es_52_30,NA,NA,Modelled melt extract,52,30,0,1,2,2,0,8.035714294,698,74.62754619,0,15.44529175,0.178960207,0.066112688,0.602993309,5.532948056,3.546147796,2,19,43,1,20,32,Excess,Steep,1->1,Low,1.242136255,0.178542842,0.001640334,0.302967669,0.075289762,0.010752876,0,0.002490956,0.25,16.6,1.15,39.70513694
Melt_es_73_30,NA,NA,Modelled melt extract,73,30,0,2,2,0,0,7,698,75.03992083,0,15.06870881,0.165305985,0.061849178,0.558891663,4.507118278,4.598205249,2,1,7,1,20,45,Excess,Isobaric,1->1,Low,1.249000014,0.145440315,0.001534552,0.295580793,0.097626438,0.009966433,0,0.002300902,0.23,14.59,1.17,40.00965233
Melt_es_76_30,NA,NA,Modelled melt extract,76,30,0,2,2,1,0,7.517857147,698,74.74168404,0,15.32901296,0.173343606,0.06457899,0.583476842,5.091543551,4.016360011,2,1,28,1,20,45,Excess,Gentle,1->1,Low,1.244036019,0.164299149,0.001602281,0.300686798,0.085273036,0.010404848,0,0.002412778,0.24,15.79,1.16,39.90679422
Melt_es_79_30,NA,NA,Modelled melt extract,79,30,0,2,2,2,0,8.035714294,698,74.68487156,0,15.26065054,0.178933692,0.066102893,0.602903968,5.25973878,3.946798569,2,1,43,1,20,45,Excess,Steep,1->1,Low,1.243090405,0.169726645,0.001640091,0.299345833,0.083796148,0.010751282,0,0.002490586,0.25,15.79,1.13,39.70513694
Melt_es_100_30,NA,NA,Modelled melt extract,100,30,1,0,2,0,0,7,698,74.98929529,0,15.25702567,0.167894891,0.061974624,0.565659297,5.062763392,3.895386834,2,1,7,1,42,20,Excess,Isobaric,1->1,Low,1.248157378,0.163370441,0.001537664,0.299274729,0.082704604,0.010087117,0,0.002336937,0.23,16.2,1.17,39.68573923
Melt_es_103_30,NA,NA,Modelled melt extract,103,30,1,0,2,1,0,7.517857147,698,74.79039202,0,15.34103784,0.173351462,0.064581917,0.583503286,5.224337186,3.822796284,2,1,28,1,42,20,Excess,Gentle,1->1,Low,1.244846738,0.16858427,0.001602354,0.300922672,0.081163403,0.01040532,0,0.002412887,0.24,16.2,1.16,39.90679422
Melt_es_106_30,NA,NA,Modelled melt extract,106,30,1,0,2,2,0,8.035714294,698,74.29991224,0,15.64868531,0.17893981,0.066105153,0.602924583,5.661108515,3.542324394,2,1,43,1,42,20,Excess,Steep,1->1,Low,1.23668296,0.182678455,0.001640147,0.306957342,0.075208586,0.01075165,0,0.002490672,0.25,16.99,1.14,39.70513694
Melt_es_127_30,NA,NA,Modelled melt extract,127,30,1,1,2,0,0,7,698,75.15492958,0,15.03098592,0.167887324,0.061971831,0.564507042,4.558873239,4.46084507,2,1,7,1,42,32,Excess,Isobaric,1->1,Low,1.250914274,0.147110397,0.001537595,0.294840838,0.094710086,0.010066569,0,0.002336832,0.23,14.61,1.17,39.68573923
Melt_es_128_30,NA,NA,Modelled melt extract,128,30,1,1,2,0,1,7,698,75.15492958,0,15.03098592,0.167887324,0.061971831,0.564507042,4.558873239,4.46084507,2,1,14,1,42,32,Excess,Isobaric,7->1,Low,1.250914274,0.147110397,0.001537595,0.294840838,0.094710086,0.010066569,0,0.002336832,0.23,14.61,1.17,39.68573923
Melt_es_130_30,NA,NA,Modelled melt extract,130,30,1,1,2,1,0,7.517857147,698,74.79039202,0,15.34103784,0.173351462,0.064581917,0.583503286,5.224337186,3.822796284,2,10,28,1,42,32,Excess,Gentle,1->1,Low,1.244846738,0.16858427,0.001602354,0.300922672,0.081163403,0.01040532,0,0.002412887,0.24,16.2,1.16,39.90679422
Melt_es_131_30,NA,NA,Modelled melt extract,131,30,1,1,2,1,1,7.517857147,698,74.79039202,0,15.34103784,0.173351462,0.064581917,0.583503286,5.224337186,3.822796284,2,10,35,1,42,32,Excess,Gentle,7->1,Low,1.244846738,0.16858427,0.001602354,0.300922672,0.081163403,0.01040532,0,0.002412887,0.24,16.2,1.16,39.90679422
Melt_es_133_30,NA,NA,Modelled melt extract,133,30,1,1,2,2,0,8.035714294,698,74.29991224,0,15.64868531,0.17893981,0.066105153,0.602924583,5.661108515,3.542324394,2,19,43,1,42,32,Excess,Steep,1->1,Low,1.23668296,0.182678455,0.001640147,0.306957342,0.075208586,0.01075165,0,0.002490672,0.25,16.99,1.14,39.70513694
Melt_es_154_30,NA,NA,Modelled melt extract,154,30,1,2,2,0,0,7,698,75.15492958,0,15.03098592,0.167887324,0.061971831,0.564507042,4.558873239,4.46084507,610,1,7,1,42,45,Excess,Isobaric,1->1,Low,1.250914274,0.147110397,0.001537595,0.294840838,0.094710086,0.010066569,0,0.002336832,0.23,14.61,1.17,39.68573923
Melt_es_181_30,NA,NA,Modelled melt extract,181,30,2,0,2,0,0,7,698,74.78007521,0,15.66293632,0.112926722,0.063238964,0.57253848,6.01673574,2.791548564,1540,1,7,1,60,20,Excess,Isobaric,1->1,Low,1.24467502,0.194154199,0.001569034,0.307236883,0.059268547,0.01020979,0,0.001571832,0.18,19.02,1.17,49.95544907
Melt_es_184_30,NA,NA,Modelled melt extract,184,30,2,0,2,1,0,7.517857147,698,74.52075952,0,15.75134006,0.115835377,0.064731534,0.591668938,6.075679113,2.879985464,1662,1,28,1,60,20,Excess,Gentle,1->1,Low,1.240358847,0.196056245,0.001606066,0.30897097,0.061146188,0.010550934,0,0.001612318,0.18,18.58,1.15,49.90287293
Melt_es_187_30,NA,NA,Modelled melt extract,187,30,2,0,2,2,0,8.035714294,698,74.45619955,0,15.6755894,0.118564458,0.066122486,0.603082676,5.937343244,3.14309818,1789,1,43,1,60,20,Excess,Steep,1->1,Low,1.23928428,0.191592281,0.001640577,0.30748508,0.066732445,0.010754469,0,0.001650304,0.18,17.82,1.14,49.85221466
Melt_es_188_30,NA,NA,Modelled melt extract,188,30,2,0,2,2,1,8.035714294,698,74.50519883,0,15.68770522,0.118569865,0.066125502,0.604250274,6.075565487,2.942584823,1876,1,36,1,60,20,Excess,Steep,7->1,Low,1.240099847,0.196052578,0.001640652,0.307722739,0.062475262,0.01077529,0,0.00165038,0.18,18.19,1.14,49.85221466
Melt_es_208_30,NA,NA,Modelled melt extract,208,30,2,1,2,0,0,7,698,74.89438405,0,15.23122852,0.110403875,0.061961359,0.564411649,4.679772433,4.457838112,2501,1,7,1,60,32,Excess,Isobaric,1->1,Low,1.246577631,0.151011696,0.001537335,0.298768704,0.094646244,0.010064868,0,0.001536717,0.17,15,1.17,50.0100541
Melt_es_209_30,NA,NA,Modelled melt extract,209,30,2,1,2,0,1,7,698,74.92704472,0,15.23328789,0.111545525,0.061969736,0.564487961,4.760402465,4.341261704,2589,1,14,1,60,32,Excess,Isobaric,7->1,Low,1.24712125,0.153613549,0.001537543,0.298809099,0.092171161,0.010066229,0,0.001552607,0.17,15.26,1.17,49.75624675
Melt_es_210_30,NA,NA,Modelled melt extract,210,30,2,1,2,0,2,7,698,74.89438405,0,15.23122852,0.110403875,0.061961359,0.564411649,4.679772433,4.457838112,2601,1,21,1,60,32,Excess,Isobaric,10->1,Low,1.246577631,0.151011696,0.001537335,0.298768704,0.094646244,0.010064868,0,0.001536717,0.17,15,1.17,50.0100541
Melt_es_211_30,NA,NA,Modelled melt extract,211,30,2,1,2,1,0,7.517857147,698,74.84419263,0,15.3427762,0.114447592,0.064589235,0.583569405,5.226062323,3.824362606,2611,10,28,1,60,32,Excess,Gentle,1->1,Low,1.245742221,0.168639939,0.001602536,0.300956771,0.081196658,0.010406499,0,0.001593001,0.18,16.21,1.16,50.14917977
Melt_es_214_30,NA,NA,Modelled melt extract,214,30,2,1,2,2,0,8.035714294,698,74.34634936,0,15.66026123,0.118534728,0.066105906,0.602931455,5.662312795,3.543504525,2736,19,43,1,60,32,Excess,Steep,1->1,Low,1.237455881,0.182717316,0.001640166,0.30718441,0.075233642,0.010751773,0,0.00164989,0.18,16.99,1.14,49.85221466
Melt_es_235_30,NA,NA,Modelled melt extract,235,30,2,2,2,0,0,7,698,74.89438405,0,15.23122852,0.110403875,0.061961359,0.564411649,4.679772433,4.457838112,3408,1,7,1,60,45,Excess,Isobaric,1->1,Low,1.246577631,0.151011696,0.001537335,0.298768704,0.094646244,0.010064868,0,0.001536717,0.17,15,1.17,50.0100541
Melt_es_19_31,NA,NA,Modelled melt extract,19,31,0,0,2,0,0,7,700,74.59246768,0,15.24451939,0.293423272,0.06183249,0.780213603,4.251826869,4.775716695,2,1,7,1,20,20,Excess,Isobaric,1->1,Low,1.241552391,0.13720231,0.001534137,0.299029411,0.101395259,0.013913156,0,0.004084172,0.36,9.86,1.18,27.3060323
Melt_es_20_31,NA,NA,Modelled melt extract,20,31,0,0,2,0,1,7,700,74.59246768,0,15.24451939,0.293423272,0.06183249,0.780213603,4.251826869,4.775716695,2,1,14,1,20,20,Excess,Isobaric,7->1,Low,1.241552391,0.13720231,0.001534137,0.299029411,0.101395259,0.013913156,0,0.004084172,0.36,9.86,1.18,27.3060323
Melt_es_22_31,NA,NA,Modelled melt extract,22,31,0,0,2,1,0,7.53571429,700,74.44120946,0,15.53171483,0.173329859,0.064573869,0.815669926,4.959726297,4.013775759,2,1,28,1,20,20,Excess,Gentle,1->1,Low,1.239034778,0.160045535,0.001602154,0.304662904,0.085218169,0.014545431,0,0.002412586,0.24,11,1.17,39.90679422
Melt_es_25_31,NA,NA,Modelled melt extract,25,31,0,0,2,2,0,8.07142858,700,74.62754619,0,15.44529175,0.178960207,0.066112688,0.602993309,5.532948056,3.546147796,2,1,43,1,20,20,Excess,Steep,1->1,Low,1.242136255,0.178542842,0.001640334,0.302967669,0.075289762,0.010752876,0,0.002490956,0.25,16.6,1.15,39.70513694
Melt_es_26_31,NA,NA,Modelled melt extract,26,31,0,0,2,2,1,8.07142858,700,74.62754619,0,15.44529175,0.178960207,0.066112688,0.602993309,5.532948056,3.546147796,2,1,36,1,20,20,Excess,Steep,7->1,Low,1.242136255,0.178542842,0.001640334,0.302967669,0.075289762,0.010752876,0,0.002490956,0.25,16.6,1.15,39.70513694
Melt_es_46_31,NA,NA,Modelled melt extract,46,31,0,1,2,0,0,7,700,74.59246768,0,15.24451939,0.293423272,0.06183249,0.780213603,4.251826869,4.775716695,2,1,7,1,20,32,Excess,Isobaric,1->1,Low,1.241552391,0.13720231,0.001534137,0.299029411,0.101395259,0.013913156,0,0.004084172,0.36,9.86,1.18,27.3060323
Melt_es_47_31,NA,NA,Modelled melt extract,47,31,0,1,2,0,1,7,700,74.59246768,0,15.24451939,0.293423272,0.06183249,0.780213603,4.251826869,4.775716695,2,1,14,1,20,32,Excess,Isobaric,7->1,Low,1.241552391,0.13720231,0.001534137,0.299029411,0.101395259,0.013913156,0,0.004084172,0.36,9.86,1.18,27.3060323
Melt_es_49_31,NA,NA,Modelled melt extract,49,31,0,1,2,1,0,7.53571429,700,74.44120946,0,15.53171483,0.173329859,0.064573869,0.815669926,4.959726297,4.013775759,2,10,28,1,20,32,Excess,Gentle,1->1,Low,1.239034778,0.160045535,0.001602154,0.304662904,0.085218169,0.014545431,0,0.002412586,0.24,11,1.17,39.90679422
Melt_es_52_31,NA,NA,Modelled melt extract,52,31,0,1,2,2,0,8.07142858,700,74.57770078,0,15.43301343,0.178950008,0.06610892,0.602958944,5.395855655,3.745412269,2,19,43,1,20,32,Excess,Steep,1->1,Low,1.241306604,0.174119004,0.001640241,0.302726823,0.07952043,0.010752263,0,0.002490814,0.25,16.19,1.14,39.70513694
Melt_es_73_31,NA,NA,Modelled melt extract,73,31,0,2,2,0,0,7,700,74.59246768,0,15.24451939,0.293423272,0.06183249,0.780213603,4.251826869,4.775716695,2,1,7,1,20,45,Excess,Isobaric,1->1,Low,1.241552391,0.13720231,0.001534137,0.299029411,0.101395259,0.013913156,0,0.004084172,0.36,9.86,1.18,27.3060323
Melt_es_74_31,NA,NA,Modelled melt extract,74,31,0,2,2,0,1,7,700,74.59246768,0,15.24451939,0.293423272,0.06183249,0.780213603,4.251826869,4.775716695,2,1,14,1,20,45,Excess,Isobaric,7->1,Low,1.241552391,0.13720231,0.001534137,0.299029411,0.101395259,0.013913156,0,0.004084172,0.36,9.86,1.18,27.3060323
Melt_es_75_31,NA,NA,Modelled melt extract,75,31,0,2,2,0,2,7,700,74.59246768,0,15.24451939,0.293423272,0.06183249,0.780213603,4.251826869,4.775716695,2,1,21,1,20,45,Excess,Isobaric,10->1,Low,1.241552391,0.13720231,0.001534137,0.299029411,0.101395259,0.013913156,0,0.004084172,0.36,9.86,1.18,27.3060323
Melt_es_76_31,NA,NA,Modelled melt extract,76,31,0,2,2,1,0,7.53571429,700,74.44120946,0,15.53171483,0.173329859,0.064573869,0.815669926,4.959726297,4.013775759,2,1,28,1,20,45,Excess,Gentle,1->1,Low,1.239034778,0.160045535,0.001602154,0.304662904,0.085218169,0.014545431,0,0.002412586,0.24,11,1.17,39.90679422
Melt_es_79_31,NA,NA,Modelled melt extract,79,31,0,2,2,2,0,8.07142858,700,74.26361879,0,15.50096668,0.176276584,0.06596156,0.832480382,5.06311839,4.097577619,2,1,43,1,20,45,Excess,Steep,1->1,Low,1.236078875,0.163381897,0.001636585,0.304059762,0.086997402,0.014845203,0,0.002453602,0.24,11.01,1.15,40.01246767
Melt_es_100_31,NA,NA,Modelled melt extract,100,31,1,0,2,0,0,7,700,74.98929529,0,15.25702567,0.167894891,0.061974624,0.565659297,5.062763392,3.895386834,2,1,7,1,42,20,Excess,Isobaric,1->1,Low,1.248157378,0.163370441,0.001537664,0.299274729,0.082704604,0.010087117,0,0.002336937,0.23,16.2,1.17,39.68573923
Melt_es_103_31,NA,NA,Modelled melt extract,103,31,1,0,2,1,0,7.53571429,700,74.74168404,0,15.32901296,0.173343606,0.06457899,0.583476842,5.091543551,4.016360011,2,1,28,1,42,20,Excess,Gentle,1->1,Low,1.244036019,0.164299149,0.001602281,0.300686798,0.085273036,0.010404848,0,0.002412778,0.24,15.79,1.16,39.90679422
Melt_es_104_31,NA,NA,Modelled melt extract,104,31,1,0,2,1,1,7.53571429,700,74.44120946,0,15.53171483,0.173329859,0.064573869,0.815669926,4.959726297,4.013775759,2,1,35,1,42,20,Excess,Gentle,7->1,Low,1.239034778,0.160045535,0.001602154,0.304662904,0.085218169,0.014545431,0,0.002412586,0.24,11,1.17,39.90679422
Melt_es_106_31,NA,NA,Modelled melt extract,106,31,1,0,2,2,0,8.07142858,700,74.62754619,0,15.44529175,0.178960207,0.066112688,0.602993309,5.532948056,3.546147796,2,1,43,1,42,20,Excess,Steep,1->1,Low,1.242136255,0.178542842,0.001640334,0.302967669,0.075289762,0.010752876,0,0.002490956,0.25,16.6,1.15,39.70513694
Melt_es_127_31,NA,NA,Modelled melt extract,127,31,1,1,2,0,0,7,700,74.74418082,0,15.27043742,0.165298549,0.061846396,0.78151355,4.3809738,4.595749466,2,1,7,1,42,32,Excess,Isobaric,1->1,Low,1.244077577,0.141369756,0.001534482,0.299537807,0.097574299,0.013936337,0,0.002300798,0.23,10.14,1.18,40.00965233
Melt_es_130_31,NA,NA,Modelled melt extract,130,31,1,1,2,1,0,7.53571429,700,74.74168404,0,15.32901296,0.173343606,0.06457899,0.583476842,5.091543551,4.016360011,2,10,28,1,42,32,Excess,Gentle,1->1,Low,1.244036019,0.164299149,0.001602281,0.300686798,0.085273036,0.010404848,0,0.002412778,0.24,15.79,1.16,39.90679422
Melt_es_132_31,NA,NA,Modelled melt extract,132,31,1,1,2,1,2,7.53571429,700,74.44120946,0,15.53171483,0.173329859,0.064573869,0.815669926,4.959726297,4.013775759,2,10,42,1,42,32,Excess,Gentle,10->1,Low,1.239034778,0.160045535,0.001602154,0.304662904,0.085218169,0.014545431,0,0.002412586,0.24,11,1.17,39.90679422
Melt_es_133_31,NA,NA,Modelled melt extract,133,31,1,1,2,2,0,8.07142858,700,74.62754619,0,15.44529175,0.178960207,0.066112688,0.602993309,5.532948056,3.546147796,2,19,43,1,42,32,Excess,Steep,1->1,Low,1.242136255,0.178542842,0.001640334,0.302967669,0.075289762,0.010752876,0,0.002490956,0.25,16.6,1.15,39.70513694
Melt_es_134_31,NA,NA,Modelled melt extract,134,31,1,1,2,2,1,8.07142858,700,74.62754619,0,15.44529175,0.178960207,0.066112688,0.602993309,5.532948056,3.546147796,31,19,36,1,42,32,Excess,Steep,7->1,Low,1.242136255,0.178542842,0.001640334,0.302967669,0.075289762,0.010752876,0,0.002490956,0.25,16.6,1.15,39.70513694
Melt_es_154_31,NA,NA,Modelled melt extract,154,31,1,2,2,0,0,7,700,74.74418082,0,15.27043742,0.165298549,0.061846396,0.78151355,4.3809738,4.595749466,611,1,7,1,42,45,Excess,Isobaric,1->1,Low,1.244077577,0.141369756,0.001534482,0.299537807,0.097574299,0.013936337,0,0.002300798,0.23,10.14,1.18,40.00965233
Melt_es_181_31,NA,NA,Modelled melt extract,181,31,2,0,2,0,0,7,700,74.74282101,0,15.67352101,0.170511648,0.095983378,0.573641835,6.144065404,2.599455718,1541,1,7,1,60,20,Excess,Isobaric,1->1,Low,1.244054944,0.198263004,0.002381462,0.307444508,0.055190143,0.010229466,0,0.00237336,0.27,19.38,1.17,50.08519685
Melt_es_184_31,NA,NA,Modelled melt extract,184,31,2,0,2,1,0,7.53571429,700,74.6409632,0,15.71568382,0.117213283,0.066003596,0.598584337,6.148576371,2.712975397,1663,1,28,1,60,20,Excess,Gentle,1->1,Low,1.242359574,0.198408568,0.001637628,0.308271554,0.057600327,0.010674253,0,0.001631497,0.18,18.59,1.16,50.09376189
Melt_es_187_31,NA,NA,Modelled melt extract,187,31,2,0,2,2,0,8.07142858,700,74.5236737,0,15.67598403,0.118653736,0.067313177,0.605818597,6.054763263,2.953793497,1790,1,43,1,60,20,Excess,Steep,1->1,Low,1.240407352,0.195381311,0.00167012,0.307492821,0.062713238,0.010803258,0,0.001651547,0.19,18.09,1.14,50.27957215
Melt_es_208_31,NA,NA,Modelled melt extract,208,31,2,1,2,0,0,7,700,74.93746761,0,15.24438335,0.111544268,0.061969038,0.564481601,4.80879735,4.271356784,2502,1,7,1,60,32,Excess,Isobaric,1->1,Low,1.247294734,0.155175205,0.001537525,0.299026743,0.090686981,0.010066116,0,0.00155259,0.17,15.42,1.17,49.75624675
Melt_es_211_31,NA,NA,Modelled melt extract,211,31,2,1,2,1,0,7.53571429,700,74.79547669,0,15.33074988,0.114442405,0.064586308,0.583542956,5.093253564,4.017948195,2612,10,28,1,60,32,Excess,Gentle,1->1,Low,1.24493137,0.16435433,0.001602463,0.300720869,0.085306756,0.010406027,0,0.001592929,0.18,15.79,1.16,50.14917977
Melt_es_212_31,NA,NA,Modelled melt extract,212,31,2,1,2,1,1,7.53571429,700,74.79547669,0,15.33074988,0.114442405,0.064586308,0.583542956,5.093253564,4.017948195,2711,10,35,1,60,32,Excess,Gentle,7->1,Low,1.24493137,0.16435433,0.001602463,0.300720869,0.085306756,0.010406027,0,0.001592929,0.18,15.79,1.16,50.14917977
Melt_es_213_31,NA,NA,Modelled melt extract,213,31,2,1,2,1,2,7.53571429,700,74.79547669,0,15.33074988,0.114442405,0.064586308,0.583542956,5.093253564,4.017948195,2725,10,42,1,60,32,Excess,Gentle,10->1,Low,1.24493137,0.16435433,0.001602463,0.300720869,0.085306756,0.010406027,0,0.001592929,0.18,15.79,1.16,50.14917977
Melt_es_214_31,NA,NA,Modelled melt extract,214,31,2,1,2,2,0,8.07142858,700,74.67399234,0,15.45686668,0.11854824,0.066113442,0.603000182,5.534151012,3.547328105,2737,19,43,1,60,32,Excess,Steep,1->1,Low,1.242909327,0.178581661,0.001640353,0.303194717,0.075314822,0.010752998,0,0.001650079,0.18,16.61,1.15,49.85221466
Melt_es_235_31,NA,NA,Modelled melt extract,235,31,2,2,2,0,0,7,700,74.79788155,0,15.2699223,0.110195316,0.06184431,0.781487187,4.381950457,4.596718878,3409,1,7,1,60,45,Excess,Isobaric,1->1,Low,1.244971397,0.141401271,0.001534431,0.299527703,0.097594881,0.013935867,0,0.001533814,0.17,10.15,1.18,50.0100541
Melt_es_236_31,NA,NA,Modelled melt extract,236,31,2,2,2,0,1,7,700,74.79788155,0,15.2699223,0.110195316,0.06184431,0.781487187,4.381950457,4.596718878,3499,1,14,1,60,45,Excess,Isobaric,7->1,Low,1.244971397,0.141401271,0.001534431,0.299527703,0.097594881,0.013935867,0,0.001533814,0.17,10.15,1.18,50.0100541
Melt_es_19_32,NA,NA,Modelled melt extract,19,32,0,0,2,0,0,7,702,74.83527708,0,15.09726229,0.290720515,0.060613544,0.773383919,4.211518818,4.731223832,2,1,7,1,20,20,Excess,Isobaric,1->1,Low,1.245593826,0.135901608,0.001503894,0.296140884,0.100450612,0.013791365,0,0.004046552,0.35,9.85,1.18,27.09500903
Melt_es_22_32,NA,NA,Modelled melt extract,22,32,0,0,2,1,0,7.553571433,702,74.46567907,0,15.54902183,0.170756531,0.063326925,0.807418297,4.778921181,4.164876173,2,1,28,1,20,20,Excess,Gentle,1->1,Low,1.239442062,0.15421113,0.001571216,0.30500239,0.088426246,0.014398283,0,0.002376768,0.23,10.71,1.19,39.79793354
Melt_es_24_32,NA,NA,Modelled melt extract,24,32,0,0,2,1,2,7.553571433,702,74.46567907,0,15.54902183,0.170756531,0.063326925,0.807418297,4.778921181,4.164876173,2,1,42,1,20,20,Excess,Gentle,10->1,Low,1.239442062,0.15421113,0.001571216,0.30500239,0.088426246,0.014398283,0,0.002376768,0.23,10.71,1.19,39.79793354
Melt_es_25_32,NA,NA,Modelled melt extract,25,32,0,0,2,2,0,8.107142866,702,74.04875047,0,15.62339749,0.394288514,0.100281472,0.842136451,5.252242089,3.738903513,2,1,43,1,20,20,Excess,Steep,1->1,Low,1.232502504,0.169484734,0.002488102,0.306461308,0.07938224,0.015017395,0,0.00548812,0.49,11.29,1.16,31.19399311
Melt_es_46_32,NA,NA,Modelled melt extract,46,32,0,1,2,0,0,7,702,74.83527708,0,15.09726229,0.290720515,0.060613544,0.773383919,4.211518818,4.731223832,2,1,7,1,20,32,Excess,Isobaric,1->1,Low,1.245593826,0.135901608,0.001503894,0.296140884,0.100450612,0.013791365,0,0.004046552,0.35,9.85,1.18,27.09500903
Melt_es_48_32,NA,NA,Modelled melt extract,48,32,0,1,2,0,2,7,702,74.83527708,0,15.09726229,0.290720515,0.060613544,0.773383919,4.211518818,4.731223832,2,1,21,1,20,32,Excess,Isobaric,10->1,Low,1.245593826,0.135901608,0.001503894,0.296140884,0.100450612,0.013791365,0,0.004046552,0.35,9.85,1.18,27.09500903
Melt_es_49_32,NA,NA,Modelled melt extract,49,32,0,1,2,1,0,7.553571433,702,74.46567907,0,15.54902183,0.170756531,0.063326925,0.807418297,4.778921181,4.164876173,2,10,28,1,20,32,Excess,Gentle,1->1,Low,1.239442062,0.15421113,0.001571216,0.30500239,0.088426246,0.014398283,0,0.002376768,0.23,10.71,1.19,39.79793354
Melt_es_50_32,NA,NA,Modelled melt extract,50,32,0,1,2,1,1,7.553571433,702,74.46567907,0,15.54902183,0.170756531,0.063326925,0.807418297,4.778921181,4.164876173,2,10,35,1,20,32,Excess,Gentle,7->1,Low,1.239442062,0.15421113,0.001571216,0.30500239,0.088426246,0.014398283,0,0.002376768,0.23,10.71,1.19,39.79793354
Melt_es_52_32,NA,NA,Modelled melt extract,52,32,0,1,2,2,0,8.107142866,702,74.04875047,0,15.62339749,0.394288514,0.100281472,0.842136451,5.252242089,3.738903513,2,19,43,1,20,32,Excess,Steep,1->1,Low,1.232502504,0.169484734,0.002488102,0.306461308,0.07938224,0.015017395,0,0.00548812,0.49,11.29,1.16,31.19399311
Melt_es_53_32,NA,NA,Modelled melt extract,53,32,0,1,2,2,1,8.107142866,702,74.04875047,0,15.62339749,0.394288514,0.100281472,0.842136451,5.252242089,3.738903513,2,19,36,1,20,32,Excess,Steep,7->1,Low,1.232502504,0.169484734,0.002488102,0.306461308,0.07938224,0.015017395,0,0.00548812,0.49,11.29,1.16,31.19399311
Melt_es_73_32,NA,NA,Modelled melt extract,73,32,0,2,2,0,0,7,702,74.83527708,0,15.09726229,0.290720515,0.060613544,0.773383919,4.211518818,4.731223832,2,1,7,1,20,45,Excess,Isobaric,1->1,Low,1.245593826,0.135901608,0.001503894,0.296140884,0.100450612,0.013791365,0,0.004046552,0.35,9.85,1.18,27.09500903
Melt_es_76_32,NA,NA,Modelled melt extract,76,32,0,2,2,1,0,7.553571433,702,74.46567907,0,15.54902183,0.170756531,0.063326925,0.807418297,4.778921181,4.164876173,2,1,28,1,20,45,Excess,Gentle,1->1,Low,1.239442062,0.15421113,0.001571216,0.30500239,0.088426246,0.014398283,0,0.002376768,0.23,10.71,1.19,39.79793354
Melt_es_79_32,NA,NA,Modelled melt extract,79,32,0,2,2,2,0,8.107142866,702,74.42283635,0,15.46684863,0.176276584,0.06596156,0.83361765,4.934607074,4.099852155,2,1,43,1,20,45,Excess,Steep,1->1,Low,1.238728967,0.159234962,0.001636585,0.303390518,0.087045693,0.014865483,0,0.002453602,0.24,10.71,1.16,40.01246767
Melt_es_100_32,NA,NA,Modelled melt extract,100,32,1,0,2,0,0,7,702,75.10894353,0,15.21822574,0.169342275,0.063221116,0.572376888,5.120910384,3.746980063,2,1,7,1,42,20,Excess,Isobaric,1->1,Low,1.25014886,0.165246788,0.001568591,0.298513647,0.079553717,0.010206908,0,0.002357083,0.23,16.19,1.17,39.95723873
Melt_es_103_32,NA,NA,Modelled melt extract,103,32,1,0,2,1,0,7.553571433,702,74.46567907,0,15.54902183,0.170756531,0.063326925,0.807418297,4.778921181,4.164876173,2,1,28,1,42,20,Excess,Gentle,1->1,Low,1.239442062,0.15421113,0.001571216,0.30500239,0.088426246,0.014398283,0,0.002376768,0.23,10.71,1.19,39.79793354
Melt_es_106_32,NA,NA,Modelled melt extract,106,32,1,0,2,2,0,8.107142866,702,74.20466566,0,15.68489178,0.176298639,0.065969813,0.833721949,5.332180757,3.702271409,2,1,43,1,42,20,Excess,Steep,1->1,Low,1.235097631,0.172064277,0.001636789,0.307667551,0.078604489,0.014867343,0,0.002453909,0.24,11.57,1.16,40.01246767
Melt_es_107_32,NA,NA,Modelled melt extract,107,32,1,0,2,2,1,8.107142866,702,73.97802498,0,15.91255488,0.177438067,0.065970563,0.833731432,5.729202211,3.303077868,2,1,36,1,42,20,Excess,Steep,7->1,Low,1.231325316,0.184875773,0.001636808,0.312133285,0.070129042,0.014867512,0,0.002469769,0.24,12.43,1.16,39.85820989
Melt_es_127_32,NA,NA,Modelled melt extract,127,32,1,1,2,0,0,7,702,74.70036653,0,15.25713386,0.165276247,0.061838052,0.781408109,4.254457961,4.779519237,2,1,7,1,42,32,Excess,Isobaric,1->1,Low,1.243348311,0.137287213,0.001534275,0.299276851,0.101475992,0.013934457,0,0.002300488,0.23,9.85,1.18,40.00965233
Melt_es_130_32,NA,NA,Modelled melt extract,130,32,1,1,2,1,0,7.553571433,702,74.46567907,0,15.54902183,0.170756531,0.063326925,0.807418297,4.778921181,4.164876173,2,10,28,1,42,32,Excess,Gentle,1->1,Low,1.239442062,0.15421113,0.001571216,0.30500239,0.088426246,0.014398283,0,0.002376768,0.23,10.71,1.19,39.79793354
Melt_es_131_32,NA,NA,Modelled melt extract,131,32,1,1,2,1,1,7.553571433,702,74.46567907,0,15.54902183,0.170756531,0.063326925,0.807418297,4.778921181,4.164876173,2,10,35,1,42,32,Excess,Gentle,7->1,Low,1.239442062,0.15421113,0.001571216,0.30500239,0.088426246,0.014398283,0,0.002376768,0.23,10.71,1.19,39.79793354
Melt_es_133_32,NA,NA,Modelled melt extract,133,32,1,1,2,2,0,8.107142866,702,74.20466566,0,15.68489178,0.176298639,0.065969813,0.833721949,5.332180757,3.702271409,2,19,43,1,42,32,Excess,Steep,1->1,Low,1.235097631,0.172064277,0.001636789,0.307667551,0.078604489,0.014867343,0,0.002453909,0.24,11.57,1.16,40.01246767
Melt_es_154_32,NA,NA,Modelled melt extract,154,32,1,2,2,0,0,7,702,74.70036653,0,15.25713386,0.165276247,0.061838052,0.781408109,4.254457961,4.779519237,612,1,7,1,42,45,Excess,Isobaric,1->1,Low,1.243348311,0.137287213,0.001534275,0.299276851,0.101475992,0.013934457,0,0.002300488,0.23,9.85,1.18,40.00965233
Melt_es_157_32,NA,NA,Modelled melt extract,157,32,1,2,2,1,0,7.553571433,702,74.46567907,0,15.54902183,0.170756531,0.063326925,0.807418297,4.778921181,4.164876173,717,1,28,1,42,45,Excess,Gentle,1->1,Low,1.239442062,0.15421113,0.001571216,0.30500239,0.088426246,0.014398283,0,0.002376768,0.23,10.71,1.19,39.79793354
Melt_es_181_32,NA,NA,Modelled melt extract,181,32,2,0,2,0,0,7,702,74.74282101,0,15.67352101,0.170511648,0.095983378,0.573641835,6.144065404,2.599455718,1542,1,7,1,60,20,Excess,Isobaric,1->1,Low,1.244054944,0.198263004,0.002381462,0.307444508,0.055190143,0.010229466,0,0.00237336,0.27,19.38,1.17,50.08519685
Melt_es_184_32,NA,NA,Modelled melt extract,184,32,2,0,2,1,0,7.553571433,702,74.60342748,0,15.72634789,0.177518833,0.100138829,0.598557091,6.281435627,2.512574251,1664,1,28,1,60,20,Excess,Gentle,1->1,Low,1.241734812,0.202695807,0.002484563,0.308480735,0.053345525,0.010673767,0,0.002470893,0.28,18.99,1.16,50.13793127
Melt_es_187_32,NA,NA,Modelled melt extract,187,32,2,0,2,2,0,8.107142866,702,74.62464864,0,15.65392262,0.119975319,0.067414703,0.611302818,6.149592084,2.77314381,1791,1,43,1,60,20,Excess,Steep,1->1,Low,1.242088027,0.198441344,0.001672639,0.307060075,0.058877788,0.010901055,0,0.001669942,0.19,18.2,1.14,50.04033877
Melt_es_208_32,NA,NA,Modelled melt extract,208,32,2,1,2,0,0,7,702,74.98507059,0,15.25616613,0.111548039,0.061971133,0.56562743,4.936282408,4.083334272,2503,1,7,1,60,32,Excess,Isobaric,1->1,Low,1.24808706,0.159289023,0.001537577,0.299257868,0.086694995,0.010086549,0,0.001552642,0.17,15.79,1.17,49.75624675
Melt_es_211_32,NA,NA,Modelled melt extract,211,32,2,1,2,1,0,7.553571433,702,74.51295214,0,15.55839486,0.11306973,0.063319049,0.807317873,4.779457491,4.165488857,2613,10,28,1,60,32,Excess,Gentle,1->1,Low,1.240228897,0.154228436,0.001571021,0.305186247,0.088439254,0.014396493,0,0.001573823,0.18,10.71,1.19,49.95544907
Melt_es_214_32,NA,NA,Modelled melt extract,214,32,2,1,2,2,0,8.107142866,702,74.25016208,0,15.69626588,0.117153289,0.065969813,0.833721949,5.333318168,3.703408819,2738,19,43,1,60,32,Excess,Steep,1->1,Low,1.235854895,0.17210098,0.001636789,0.307890661,0.078628637,0.014867343,0,0.001630662,0.18,11.58,1.16,50.09376189
Melt_es_215_32,NA,NA,Modelled melt extract,215,32,2,1,2,2,1,8.107142866,702,74.03110034,0,15.91418399,0.117166615,0.065977317,0.834954328,5.732063839,3.304553572,2824,19,36,1,60,32,Excess,Steep,7->1,Low,1.232208727,0.184968115,0.001636976,0.312165241,0.070160373,0.01488932,0,0.001630848,0.18,12.42,1.16,50.09376189
Melt_es_216_32,NA,NA,Modelled melt extract,216,32,2,1,2,2,2,8.107142866,702,74.03110034,0,15.91418399,0.117166615,0.065977317,0.834954328,5.732063839,3.304553572,2837,19,29,1,60,32,Excess,Steep,10->1,Low,1.232208727,0.184968115,0.001636976,0.312165241,0.070160373,0.01488932,0,0.001630848,0.18,12.42,1.16,50.09376189
Melt_es_235_32,NA,NA,Modelled melt extract,235,32,2,2,2,0,0,7,702,74.7503823,0,15.25816317,0.110191598,0.061842224,0.781460826,4.256993793,4.780966088,3410,1,7,1,60,45,Excess,Isobaric,1->1,Low,1.244180797,0.137369042,0.001534379,0.299297041,0.101506711,0.013935397,0,0.001533762,0.17,9.86,1.18,50.0100541
Melt_es_238_32,NA,NA,Modelled melt extract,238,32,2,2,2,1,0,7.553571433,702,74.51295214,0,15.55839486,0.11306973,0.063319049,0.807317873,4.779457491,4.165488857,3517,1,28,1,60,45,Excess,Gentle,1->1,Low,1.240228897,0.154228436,0.001571021,0.305186247,0.088439254,0.014396493,0,0.001573823,0.18,10.71,1.19,49.95544907
Melt_es_19_33,NA,NA,Modelled melt extract,19,33,0,0,2,0,0,7,704,74.55667789,0,15.27497194,0.28956229,0.060606061,0.882154882,3.840628507,5.095398429,2,1,7,1,20,20,Excess,Isobaric,1->1,Low,1.240956689,0.12393334,0.001503708,0.299626754,0.108182557,0.015731023,0,0.004030431,0.35,7.88,1.21,27.1714931
Melt_es_21_33,NA,NA,Modelled melt extract,21,33,0,0,2,0,2,7,704,74.59369669,0,15.28688157,0.163868187,0.060608782,0.772200772,4.208943162,4.913800844,2,1,21,1,20,20,Excess,Isobaric,10->1,Low,1.241572848,0.135818495,0.001503776,0.299860368,0.104326982,0.013770267,0,0.002280889,0.22,9.86,1.18,39.73339501
Melt_es_22_33,NA,NA,Modelled melt extract,22,33,0,0,2,1,0,7.571428576,704,74.42081341,0,15.5354296,0.170731432,0.063317617,0.806168945,4.648191491,4.355347512,2,1,28,1,20,20,Excess,Gentle,1->1,Low,1.238695296,0.14999261,0.001570985,0.304735771,0.092470223,0.014376004,0,0.002376419,0.23,10.43,1.19,39.79793354
Melt_es_23_33,NA,NA,Modelled melt extract,23,33,0,0,2,1,1,7.571428576,704,74.42081341,0,15.5354296,0.170731432,0.063317617,0.806168945,4.648191491,4.355347512,2,1,35,1,20,20,Excess,Gentle,7->1,Low,1.238695296,0.14999261,0.001570985,0.304735771,0.092470223,0.014376004,0,0.002376419,0.23,10.43,1.19,39.79793354
Melt_es_25_33,NA,NA,Modelled melt extract,25,33,0,0,2,2,0,8.142857152,704,74.08460314,0,15.63566068,0.390038663,0.098931089,0.832385718,5.061405504,3.89697521,2,1,43,1,20,20,Excess,Steep,1->1,Low,1.233099253,0.163326624,0.002454598,0.306701857,0.082738327,0.014843515,0,0.005428966,0.49,11,1.18,31.13563481
Melt_es_27_33,NA,NA,Modelled melt extract,27,33,0,0,2,2,2,8.142857152,704,74.08460314,0,15.63566068,0.390038663,0.098931089,0.832385718,5.061405504,3.89697521,2,1,29,1,20,20,Excess,Steep,10->1,Low,1.233099253,0.163326624,0.002454598,0.306701857,0.082738327,0.014843515,0,0.005428966,0.49,11,1.18,31.13563481
Melt_es_46_33,NA,NA,Modelled melt extract,46,33,0,1,2,0,0,7,704,74.55667789,0,15.27497194,0.28956229,0.060606061,0.882154882,3.840628507,5.095398429,2,1,7,1,20,32,Excess,Isobaric,1->1,Low,1.240956689,0.12393334,0.001503708,0.299626754,0.108182557,0.015731023,0,0.004030431,0.35,7.88,1.21,27.1714931
Melt_es_47_33,NA,NA,Modelled melt extract,47,33,0,1,2,0,1,7,704,74.59369669,0,15.28688157,0.163868187,0.060608782,0.772200772,4.208943162,4.913800844,2,1,14,1,20,32,Excess,Isobaric,7->1,Low,1.241572848,0.135818495,0.001503776,0.299860368,0.104326982,0.013770267,0,0.002280889,0.22,9.86,1.18,39.73339501
Melt_es_49_33,NA,NA,Modelled melt extract,49,33,0,1,2,1,0,7.571428576,704,74.42081341,0,15.5354296,0.170731432,0.063317617,0.806168945,4.648191491,4.355347512,2,10,28,1,20,32,Excess,Gentle,1->1,Low,1.238695296,0.14999261,0.001570985,0.304735771,0.092470223,0.014376004,0,0.002376419,0.23,10.43,1.19,39.79793354
Melt_es_51_33,NA,NA,Modelled melt extract,51,33,0,1,2,1,2,7.571428576,704,74.42081341,0,15.5354296,0.170731432,0.063317617,0.806168945,4.648191491,4.355347512,2,10,42,1,20,32,Excess,Gentle,10->1,Low,1.238695296,0.14999261,0.001570985,0.304735771,0.092470223,0.014376004,0,0.002376419,0.23,10.43,1.19,39.79793354
Melt_es_52_33,NA,NA,Modelled melt extract,52,33,0,1,2,2,0,8.142857152,704,74.08460314,0,15.63566068,0.390038663,0.098931089,0.832385718,5.061405504,3.89697521,2,19,43,1,20,32,Excess,Steep,1->1,Low,1.233099253,0.163326624,0.002454598,0.306701857,0.082738327,0.014843515,0,0.005428966,0.49,11,1.18,31.13563481
Melt_es_54_33,NA,NA,Modelled melt extract,54,33,0,1,2,2,2,8.142857152,704,74.08460314,0,15.63566068,0.390038663,0.098931089,0.832385718,5.061405504,3.89697521,2,19,29,1,20,32,Excess,Steep,10->1,Low,1.233099253,0.163326624,0.002454598,0.306701857,0.082738327,0.014843515,0,0.005428966,0.49,11,1.18,31.13563481
Melt_es_73_33,NA,NA,Modelled melt extract,73,33,0,2,2,0,0,7,704,74.55667789,0,15.27497194,0.28956229,0.060606061,0.882154882,3.840628507,5.095398429,2,1,7,1,20,45,Excess,Isobaric,1->1,Low,1.240956689,0.12393334,0.001503708,0.299626754,0.108182557,0.015731023,0,0.004030431,0.35,7.88,1.21,27.1714931
Melt_es_74_33,NA,NA,Modelled melt extract,74,33,0,2,2,0,1,7,704,74.55667789,0,15.27497194,0.28956229,0.060606061,0.882154882,3.840628507,5.095398429,2,1,14,1,20,45,Excess,Isobaric,7->1,Low,1.240956689,0.12393334,0.001503708,0.299626754,0.108182557,0.015731023,0,0.004030431,0.35,7.88,1.21,27.1714931
Melt_es_76_33,NA,NA,Modelled melt extract,76,33,0,2,2,1,0,7.571428576,704,74.42081341,0,15.5354296,0.170731432,0.063317617,0.806168945,4.648191491,4.355347512,2,1,28,1,20,45,Excess,Gentle,1->1,Low,1.238695296,0.14999261,0.001570985,0.304735771,0.092470223,0.014376004,0,0.002376419,0.23,10.43,1.19,39.79793354
Melt_es_77_33,NA,NA,Modelled melt extract,77,33,0,2,2,1,1,7.571428576,704,74.42081341,0,15.5354296,0.170731432,0.063317617,0.806168945,4.648191491,4.355347512,2,1,35,1,20,45,Excess,Gentle,7->1,Low,1.238695296,0.14999261,0.001570985,0.304735771,0.092470223,0.014376004,0,0.002376419,0.23,10.43,1.19,39.79793354
Melt_es_78_33,NA,NA,Modelled melt extract,78,33,0,2,2,1,2,7.571428576,704,74.42081341,0,15.5354296,0.170731432,0.063317617,0.806168945,4.648191491,4.355347512,2,1,42,1,20,45,Excess,Gentle,10->1,Low,1.238695296,0.14999261,0.001570985,0.304735771,0.092470223,0.014376004,0,0.002376419,0.23,10.43,1.19,39.79793354
Melt_es_79_33,NA,NA,Modelled melt extract,79,33,0,2,2,2,0,8.142857152,704,74.42283635,0,15.46684863,0.176276584,0.06596156,0.83361765,4.934607074,4.099852155,2,1,43,1,20,45,Excess,Steep,1->1,Low,1.238728967,0.159234962,0.001636585,0.303390518,0.087045693,0.014865483,0,0.002453602,0.24,10.71,1.16,40.01246767
Melt_es_80_33,NA,NA,Modelled melt extract,80,33,0,2,2,2,1,8.142857152,704,74.42283635,0,15.46684863,0.176276584,0.06596156,0.83361765,4.934607074,4.099852155,2,1,36,1,20,45,Excess,Steep,7->1,Low,1.238728967,0.159234962,0.001636585,0.303390518,0.087045693,0.014865483,0,0.002453602,0.24,10.71,1.16,40.01246767
Melt_es_100_33,NA,NA,Modelled melt extract,100,33,1,0,2,0,0,7,704,74.83690692,0,15.24455511,0.370691695,0.094644688,0.565614683,5.185176839,3.702410059,2,1,7,1,42,20,Excess,Isobaric,1->1,Low,1.245620954,0.167320604,0.002348247,0.299030112,0.078607432,0.010086321,0,0.005159675,0.47,16.59,1.17,31.27692336
Melt_es_103_33,NA,NA,Modelled melt extract,103,33,1,0,2,1,0,7.571428576,704,74.51512581,0,15.56121007,0.170766186,0.063330506,0.807463953,4.909245123,3.972858355,2,1,28,1,42,20,Excess,Gentle,1->1,Low,1.240265077,0.158416556,0.001571305,0.305241469,0.084349434,0.014399098,0,0.002376903,0.23,11,1.19,39.79793354
Melt_es_106_33,NA,NA,Modelled melt extract,106,33,1,0,2,2,0,8.142857152,704,74.08460314,0,15.63566068,0.390038663,0.098931089,0.832385718,5.061405504,3.89697521,2,1,43,1,42,20,Excess,Steep,1->1,Low,1.233099253,0.163326624,0.002454598,0.306701857,0.082738327,0.014843515,0,0.005428966,0.49,11,1.18,31.13563481
Melt_es_127_33,NA,NA,Modelled melt extract,127,33,1,1,2,0,0,7,704,74.70928927,0,15.29879226,0.163875544,0.060611503,0.88335653,3.967808557,4.916266331,2,1,7,1,42,32,Excess,Isobaric,1->1,Low,1.243496825,0.128037316,0.001503843,0.300094003,0.104379328,0.015752452,0,0.002280991,0.22,8.13,1.21,39.73339501
Melt_es_128_33,NA,NA,Modelled melt extract,128,33,1,1,2,0,1,7,704,74.59369669,0,15.28688157,0.163868187,0.060608782,0.772200772,4.208943162,4.913800844,2,1,14,1,42,32,Excess,Isobaric,7->1,Low,1.241572848,0.135818495,0.001503776,0.299860368,0.104326982,0.013770267,0,0.002280889,0.22,9.86,1.18,39.73339501
Melt_es_130_33,NA,NA,Modelled melt extract,130,33,1,1,2,1,0,7.571428576,704,74.42081341,0,15.5354296,0.170731432,0.063317617,0.806168945,4.648191491,4.355347512,2,10,28,1,42,32,Excess,Gentle,1->1,Low,1.238695296,0.14999261,0.001570985,0.304735771,0.092470223,0.014376004,0,0.002376419,0.23,10.43,1.19,39.79793354
Melt_es_132_33,NA,NA,Modelled melt extract,132,33,1,1,2,1,2,7.571428576,704,74.42081341,0,15.5354296,0.170731432,0.063317617,0.806168945,4.648191491,4.355347512,2,10,42,1,42,32,Excess,Gentle,10->1,Low,1.238695296,0.14999261,0.001570985,0.304735771,0.092470223,0.014376004,0,0.002376419,0.23,10.43,1.19,39.79793354
Melt_es_133_33,NA,NA,Modelled melt extract,133,33,1,1,2,2,0,8.142857152,704,74.08460314,0,15.63566068,0.390038663,0.098931089,0.832385718,5.061405504,3.89697521,2,19,43,1,42,32,Excess,Steep,1->1,Low,1.233099253,0.163326624,0.002454598,0.306701857,0.082738327,0.014843515,0,0.005428966,0.49,11,1.18,31.13563481
Melt_es_135_33,NA,NA,Modelled melt extract,135,33,1,1,2,2,2,8.142857152,704,74.08460314,0,15.63566068,0.390038663,0.098931089,0.832385718,5.061405504,3.89697521,50,19,29,1,42,32,Excess,Steep,10->1,Low,1.233099253,0.163326624,0.002454598,0.306701857,0.082738327,0.014843515,0,0.005428966,0.49,11,1.18,31.13563481
Melt_es_154_33,NA,NA,Modelled melt extract,154,33,1,2,2,0,0,7,704,74.66271578,0,15.28722473,0.163871866,0.060610142,0.883336701,3.843131973,5.099108806,613,1,7,1,42,45,Excess,Isobaric,1->1,Low,1.242721634,0.124014124,0.00150381,0.299867099,0.108261333,0.015752098,0,0.00228094,0.22,7.87,1.21,39.73339501
Melt_es_157_33,NA,NA,Modelled melt extract,157,33,1,2,2,1,0,7.571428576,704,74.42081341,0,15.5354296,0.170731432,0.063317617,0.806168945,4.648191491,4.355347512,718,1,28,1,42,45,Excess,Gentle,1->1,Low,1.238695296,0.14999261,0.001570985,0.304735771,0.092470223,0.014376004,0,0.002376419,0.23,10.43,1.19,39.79793354
Melt_es_160_33,NA,NA,Modelled melt extract,160,33,1,2,2,2,0,8.142857152,704,74.08460314,0,15.63566068,0.390038663,0.098931089,0.832385718,5.061405504,3.89697521,833,1,43,1,42,45,Excess,Steep,1->1,Low,1.233099253,0.163326624,0.002454598,0.306701857,0.082738327,0.014843515,0,0.005428966,0.49,11,1.18,31.13563481
Melt_es_181_33,NA,NA,Modelled melt extract,181,33,2,0,2,0,0,7,704,74.86364768,0,15.6380836,0.171996289,0.096182135,0.579355919,6.215629031,2.435105348,1543,1,7,1,60,20,Excess,Isobaric,1->1,Low,1.24606604,0.200572292,0.002386393,0.306749384,0.05170075,0.010331362,0,0.002394024,0.27,19.41,1.17,49.9201799
Melt_es_182_33,NA,NA,Modelled melt extract,182,33,2,0,2,0,1,7,704,74.86364768,0,15.6380836,0.171996289,0.096182135,0.579355919,6.215629031,2.435105348,1636,1,14,1,60,20,Excess,Isobaric,7->1,Low,1.24606604,0.200572292,0.002386393,0.306749384,0.05170075,0.010331362,0,0.002394024,0.27,19.41,1.17,49.9201799
Melt_es_184_33,NA,NA,Modelled melt extract,184,33,2,0,2,1,0,7.571428576,704,74.60683868,0,15.74919548,0.17739166,0.098929964,0.595854039,6.387236897,2.38455328,1665,1,28,1,60,20,Excess,Gentle,1->1,Low,1.241791589,0.206109911,0.00245457,0.308928903,0.050627458,0.010625565,0,0.002469123,0.28,19.4,1.16,49.85221466
Melt_es_187_33,NA,NA,Modelled melt extract,187,33,2,0,2,2,0,8.142857152,704,74.40585009,0,15.84780622,0.181672761,0.101691042,0.611288848,6.284277879,2.567413163,1792,1,43,1,60,20,Excess,Steep,1->1,Low,1.23844624,0.202787524,0.002523075,0.310863205,0.054509834,0.010900806,0,0.002528712,0.28,18.6,1.16,49.94421565
Melt_es_208_33,NA,NA,Modelled melt extract,208,33,2,1,2,0,0,7,704,75.14763558,0,15.27070279,0.111571924,0.061984402,0.565748546,4.94297435,3.89938241,2504,1,7,1,60,32,Excess,Isobaric,1->1,Low,1.250792869,0.159504966,0.001537907,0.299543013,0.082789435,0.010088709,0,0.001552975,0.17,15.81,1.19,49.75624675
Melt_es_211_33,NA,NA,Modelled melt extract,211,33,2,1,2,1,0,7.571428576,704,74.56710814,0,15.56261805,0.113100422,0.063336236,0.807537012,4.911951322,3.974348824,2614,10,28,1,60,32,Excess,Gentle,1->1,Low,1.241130295,0.158503883,0.001571447,0.305269087,0.084381079,0.0144004,0,0.00157425,0.18,11.01,1.19,49.95544907
Melt_es_212_33,NA,NA,Modelled melt extract,212,33,2,1,2,1,1,7.571428576,704,74.46435638,0,15.54638476,0.113064616,0.063316185,0.807281361,4.649217028,4.356379671,2712,10,35,1,60,32,Excess,Gentle,7->1,Low,1.239420046,0.150025703,0.00157095,0.304950662,0.092492137,0.014395841,0,0.001573752,0.18,10.42,1.19,49.95544907
Melt_es_214_33,NA,NA,Modelled melt extract,214,33,2,1,2,2,0,8.142857152,704,74.13781313,0,15.83050307,0.118529325,0.066102893,0.843381733,5.25973878,3.743931071,2739,19,43,1,60,32,Excess,Steep,1->1,Low,1.233984906,0.169726645,0.001640091,0.310523795,0.079488982,0.015039601,0,0.001649815,0.18,11.29,1.18,49.85221466
Melt_es_235_33,NA,NA,Modelled melt extract,235,33,2,2,2,0,0,7,704,75.04237621,0,15.10950462,0.108887218,0.060617626,0.663426243,4.09393487,4.921253213,3411,1,7,1,60,45,Excess,Isobaric,1->1,Low,1.249040882,0.132107289,0.001503995,0.296381024,0.104485206,0.011830546,0,0.001515606,0.17,11.17,1.19,49.80773909
Melt_es_238_33,NA,NA,Modelled melt extract,238,33,2,2,2,1,0,7.571428576,704,74.46435638,0,15.54638476,0.113064616,0.063316185,0.807281361,4.649217028,4.356379671,3518,1,28,1,60,45,Excess,Gentle,1->1,Low,1.239420046,0.150025703,0.00157095,0.304950662,0.092492137,0.014395841,0,0.001573752,0.18,10.42,1.19,49.95544907
Melt_es_239_33,NA,NA,Modelled melt extract,239,33,2,2,2,1,1,7.571428576,704,74.46435638,0,15.54638476,0.113064616,0.063316185,0.807281361,4.649217028,4.356379671,3605,1,35,1,60,45,Excess,Gentle,7->1,Low,1.239420046,0.150025703,0.00157095,0.304950662,0.092492137,0.014395841,0,0.001573752,0.18,10.42,1.19,49.95544907
Melt_es_241_33,NA,NA,Modelled melt extract,241,33,2,2,2,2,0,8.142857152,704,74.13781313,0,15.83050307,0.118529325,0.066102893,0.843381733,5.25973878,3.743931071,3627,1,43,1,60,45,Excess,Steep,1->1,Low,1.233984906,0.169726645,0.001640091,0.310523795,0.079488982,0.015039601,0,0.001649815,0.18,11.29,1.18,49.85221466
Melt_es_19_34,NA,NA,Modelled melt extract,19,34,0,0,2,0,0,7,706,74.7014407,0,15.11281396,0.286796173,0.060496068,0.872711792,3.558065022,5.407676279,2,1,7,1,20,20,Excess,Isobaric,1->1,Low,1.24336619,0.114815291,0.001500979,0.296445939,0.11481266,0.015562629,0,0.003991929,0.35,7.38,1.21,27.325764
Melt_es_20_34,NA,NA,Modelled melt extract,20,34,0,0,2,0,1,7,706,74.80645776,0,15.12486416,0.162452245,0.060499457,0.87388104,3.560505058,5.411340287,2,1,14,1,20,20,Excess,Isobaric,7->1,Low,1.245114144,0.114894029,0.001501063,0.29668231,0.114890452,0.01558348,0,0.00226118,0.22,7.37,1.21,39.89808832
Melt_es_22_34,NA,NA,Modelled melt extract,22,34,0,0,2,1,0,7.589285719,706,74.68255673,0,15.3322554,0.170735292,0.063319049,0.806187176,4.395020409,4.549925939,2,1,28,1,20,20,Excess,Gentle,1->1,Low,1.243051876,0.141823026,0.001571021,0.3007504,0.0966014,0.014376329,0,0.002376473,0.23,9.87,1.19,39.79793354
Melt_es_25_34,NA,NA,Modelled melt extract,25,34,0,0,2,2,0,8.178571438,706,74.14793122,0,15.58850006,0.394270543,0.100276901,0.842098066,4.986496804,3.940426405,2,1,43,1,20,20,Excess,Steep,1->1,Low,1.234153316,0.160909393,0.002487989,0.305776776,0.083660858,0.01501671,0,0.00548787,0.49,10.72,1.18,31.19399311
Melt_es_26_34,NA,NA,Modelled melt extract,26,34,0,0,2,2,1,8.178571438,706,74.14793122,0,15.58850006,0.394270543,0.100276901,0.842098066,4.986496804,3.940426405,2,1,36,1,20,20,Excess,Steep,7->1,Low,1.234153316,0.160909393,0.002487989,0.305776776,0.083660858,0.01501671,0,0.00548787,0.49,10.72,1.18,31.19399311
Melt_es_46_34,NA,NA,Modelled melt extract,46,34,0,1,2,0,0,7,706,74.7014407,0,15.11281396,0.286796173,0.060496068,0.872711792,3.558065022,5.407676279,2,1,7,1,20,32,Excess,Isobaric,1->1,Low,1.24336619,0.114815291,0.001500979,0.296445939,0.11481266,0.015562629,0,0.003991929,0.35,7.38,1.21,27.325764
Melt_es_47_34,NA,NA,Modelled melt extract,47,34,0,1,2,0,1,7,706,74.80645776,0,15.12486416,0.162452245,0.060499457,0.87388104,3.560505058,5.411340287,2,1,14,1,20,32,Excess,Isobaric,7->1,Low,1.245114144,0.114894029,0.001501063,0.29668231,0.114890452,0.01558348,0,0.00226118,0.22,7.37,1.21,39.89808832
Melt_es_48_34,NA,NA,Modelled melt extract,48,34,0,1,2,0,2,7,706,74.80645776,0,15.12486416,0.162452245,0.060499457,0.87388104,3.560505058,5.411340287,2,1,21,1,20,32,Excess,Isobaric,10->1,Low,1.245114144,0.114894029,0.001501063,0.29668231,0.114890452,0.01558348,0,0.00226118,0.22,7.37,1.21,39.89808832
Melt_es_49_34,NA,NA,Modelled melt extract,49,34,0,1,2,1,0,7.589285719,706,74.68255673,0,15.3322554,0.170735292,0.063319049,0.806187176,4.395020409,4.549925939,2,10,28,1,20,32,Excess,Gentle,1->1,Low,1.243051876,0.141823026,0.001571021,0.3007504,0.0966014,0.014376329,0,0.002376473,0.23,9.87,1.19,39.79793354
Melt_es_52_34,NA,NA,Modelled melt extract,52,34,0,1,2,2,0,8.178571438,706,74.14793122,0,15.58850006,0.394270543,0.100276901,0.842098066,4.986496804,3.940426405,2,19,43,1,20,32,Excess,Steep,1->1,Low,1.234153316,0.160909393,0.002487989,0.305776776,0.083660858,0.01501671,0,0.00548787,0.49,10.72,1.18,31.19399311
Melt_es_53_34,NA,NA,Modelled melt extract,53,34,0,1,2,2,1,8.178571438,706,74.14793122,0,15.58850006,0.394270543,0.100276901,0.842098066,4.986496804,3.940426405,2,19,36,1,20,32,Excess,Steep,7->1,Low,1.234153316,0.160909393,0.002487989,0.305776776,0.083660858,0.01501671,0,0.00548787,0.49,10.72,1.18,31.19399311
Melt_es_54_34,NA,NA,Modelled melt extract,54,34,0,1,2,2,2,8.178571438,706,74.14793122,0,15.58850006,0.394270543,0.100276901,0.842098066,4.986496804,3.940426405,2,19,29,1,20,32,Excess,Steep,10->1,Low,1.234153316,0.160909393,0.002487989,0.305776776,0.083660858,0.01501671,0,0.00548787,0.49,10.72,1.18,31.19399311
Melt_es_73_34,NA,NA,Modelled melt extract,73,34,0,2,2,0,0,7,706,74.7014407,0,15.11281396,0.286796173,0.060496068,0.872711792,3.558065022,5.407676279,2,1,7,1,20,45,Excess,Isobaric,1->1,Low,1.24336619,0.114815291,0.001500979,0.296445939,0.11481266,0.015562629,0,0.003991929,0.35,7.38,1.21,27.325764
Melt_es_75_34,NA,NA,Modelled melt extract,75,34,0,2,2,0,2,7,706,74.80645776,0,15.12486416,0.162452245,0.060499457,0.87388104,3.560505058,5.411340287,2,1,21,1,20,45,Excess,Isobaric,10->1,Low,1.245114144,0.114894029,0.001501063,0.29668231,0.114890452,0.01558348,0,0.00226118,0.22,7.37,1.21,39.89808832
Melt_es_76_34,NA,NA,Modelled melt extract,76,34,0,2,2,1,0,7.589285719,706,74.68255673,0,15.3322554,0.170735292,0.063319049,0.806187176,4.395020409,4.549925939,2,1,28,1,20,45,Excess,Gentle,1->1,Low,1.243051876,0.141823026,0.001571021,0.3007504,0.0966014,0.014376329,0,0.002376473,0.23,9.87,1.19,39.79793354
Melt_es_79_34,NA,NA,Modelled melt extract,79,34,0,2,2,2,0,8.178571438,706,74.21222011,0,15.44287388,0.390051969,0.098934464,0.832414115,4.928528378,4.094977086,2,1,43,1,20,45,Excess,Steep,1->1,Low,1.235223371,0.159038808,0.002454681,0.302920241,0.086942189,0.014844021,0,0.005429152,0.49,10.71,1.16,31.13563481
Melt_es_81_34,NA,NA,Modelled melt extract,81,34,0,2,2,2,2,8.178571438,706,74.42283635,0,15.46684863,0.176276584,0.06596156,0.83361765,4.934607074,4.099852155,2,1,29,1,20,45,Excess,Steep,10->1,Low,1.238728967,0.159234962,0.001636585,0.303390518,0.087045693,0.014865483,0,0.002453602,0.24,10.71,1.16,40.01246767
Melt_es_100_34,NA,NA,Modelled melt extract,100,34,1,0,2,0,0,7,706,74.99098531,0,15.26863788,0.371856125,0.094654286,0.565672045,5.191336879,3.516857478,2,1,7,1,42,20,Excess,Isobaric,1->1,Low,1.248185508,0.167519383,0.002348485,0.299502508,0.074667887,0.010087344,0,0.005175883,0.47,16.61,1.19,31.21172683
Melt_es_103_34,NA,NA,Modelled melt extract,103,34,1,0,2,1,0,7.589285719,706,74.62213057,0,15.53400258,0.17335539,0.064583381,0.816923112,4.966122051,3.822882911,2,1,28,1,42,20,Excess,Gentle,1->1,Low,1.242046115,0.160251919,0.00160239,0.304707779,0.081165242,0.014567778,0,0.002412942,0.24,11,1.19,39.90679422
Melt_es_106_34,NA,NA,Modelled melt extract,106,34,1,0,2,2,0,8.178571438,706,74.14793122,0,15.58850006,0.394270543,0.100276901,0.842098066,4.986496804,3.940426405,2,1,43,1,42,20,Excess,Steep,1->1,Low,1.234153316,0.160909393,0.002487989,0.305776776,0.083660858,0.01501671,0,0.00548787,0.49,10.72,1.18,31.19399311
Melt_es_127_34,NA,NA,Modelled melt extract,127,34,1,1,2,0,0,7,706,74.75418668,0,15.31001661,0.163875544,0.060611503,0.884478966,4.092398869,4.734431823,2,1,7,1,42,32,Excess,Isobaric,1->1,Low,1.244244119,0.132057724,0.001503843,0.300314174,0.100518722,0.015772467,0,0.002280991,0.22,8.37,1.21,39.73339501
Melt_es_128_34,NA,NA,Modelled melt extract,128,34,1,1,2,0,1,7,706,74.73960672,0,15.30932926,0.163868187,0.060608782,0.884439257,4.056298824,4.785848972,2,1,14,1,42,32,Excess,Isobaric,7->1,Low,1.244001443,0.13089281,0.001503776,0.300300692,0.101610382,0.015771759,0,0.002280889,0.22,8.3,1.21,39.73339501
Melt_es_130_34,NA,NA,Modelled melt extract,130,34,1,1,2,1,0,7.589285719,706,74.68255673,0,15.3322554,0.170735292,0.063319049,0.806187176,4.395020409,4.549925939,2,10,28,1,42,32,Excess,Gentle,1->1,Low,1.243051876,0.141823026,0.001571021,0.3007504,0.0966014,0.014376329,0,0.002376473,0.23,9.87,1.19,39.79793354
Melt_es_133_34,NA,NA,Modelled melt extract,133,34,1,1,2,2,0,8.178571438,706,74.14793122,0,15.58850006,0.394270543,0.100276901,0.842098066,4.986496804,3.940426405,2,19,43,1,42,32,Excess,Steep,1->1,Low,1.234153316,0.160909393,0.002487989,0.305776776,0.083660858,0.01501671,0,0.00548787,0.49,10.72,1.18,31.19399311
Melt_es_134_34,NA,NA,Modelled melt extract,134,34,1,1,2,2,1,8.178571438,706,74.14793122,0,15.58850006,0.394270543,0.100276901,0.842098066,4.986496804,3.940426405,32,19,36,1,42,32,Excess,Steep,7->1,Low,1.234153316,0.160909393,0.002487989,0.305776776,0.083660858,0.01501671,0,0.00548787,0.49,10.72,1.18,31.19399311
Melt_es_154_34,NA,NA,Modelled melt extract,154,34,1,2,2,0,0,7,706,74.85211078,0,15.13623734,0.162454065,0.060500134,0.873890831,3.683785964,5.231020884,614,1,7,1,42,45,Excess,Isobaric,1->1,Low,1.245874014,0.118872183,0.00150108,0.296905401,0.111062015,0.015583655,0,0.002261206,0.22,7.63,1.21,39.89808832
Melt_es_155_34,NA,NA,Modelled melt extract,155,34,1,2,2,0,1,7,706,74.85211078,0,15.13623734,0.162454065,0.060500134,0.873890831,3.683785964,5.231020884,692,1,14,1,42,45,Excess,Isobaric,7->1,Low,1.245874014,0.118872183,0.00150108,0.296905401,0.111062015,0.015583655,0,0.002261206,0.22,7.63,1.21,39.89808832
Melt_es_156_34,NA,NA,Modelled melt extract,156,34,1,2,2,0,2,7,706,74.85211078,0,15.13623734,0.162454065,0.060500134,0.873890831,3.683785964,5.231020884,706,1,21,1,42,45,Excess,Isobaric,10->1,Low,1.245874014,0.118872183,0.00150108,0.296905401,0.111062015,0.015583655,0,0.002261206,0.22,7.63,1.21,39.89808832
Melt_es_157_34,NA,NA,Modelled melt extract,157,34,1,2,2,1,0,7.589285719,706,74.68255673,0,15.3322554,0.170735292,0.063319049,0.806187176,4.395020409,4.549925939,719,1,28,1,42,45,Excess,Gentle,1->1,Low,1.243051876,0.141823026,0.001571021,0.3007504,0.0966014,0.014376329,0,0.002376473,0.23,9.87,1.19,39.79793354
Melt_es_160_34,NA,NA,Modelled melt extract,160,34,1,2,2,2,0,8.178571438,706,74.14793122,0,15.58850006,0.394270543,0.100276901,0.842098066,4.986496804,3.940426405,834,1,43,1,42,45,Excess,Steep,1->1,Low,1.234153316,0.160909393,0.002487989,0.305776776,0.083660858,0.01501671,0,0.00548787,0.49,10.72,1.18,31.19399311
Melt_es_181_34,NA,NA,Modelled melt extract,181,34,2,0,2,0,0,7,706,74.91145285,0,15.64993041,0.172002127,0.0961854,0.58050718,6.348236412,2.241685621,1544,1,7,1,60,20,Excess,Isobaric,1->1,Low,1.246861732,0.204851403,0.002386474,0.306981766,0.047594175,0.010351892,0,0.002394106,0.27,19.79,1.17,49.9201799
Melt_es_184_34,NA,NA,Modelled melt extract,184,34,2,0,2,1,0,7.589285719,706,74.72367689,0,15.76717293,0.176074337,0.098828822,0.59297293,6.35230771,2.288966387,1666,1,28,1,60,20,Excess,Gentle,1->1,Low,1.2437363,0.20498278,0.00245206,0.30928154,0.048598012,0.010574187,0,0.002450787,0.27,19.39,1.17,50.01298648
Melt_es_187_34,NA,NA,Modelled melt extract,187,34,2,0,2,2,0,8.178571438,706,74.4278516,0,15.84762514,0.181670685,0.10168988,0.611281864,6.329909393,2.499971435,1793,1,43,1,60,20,Excess,Steep,1->1,Low,1.238812443,0.204260008,0.002523047,0.310859654,0.05307795,0.010900681,0,0.002528683,0.28,18.74,1.16,49.94421565
Melt_es_208_34,NA,NA,Modelled melt extract,208,34,2,1,2,0,0,7,706,75.19441001,0,15.28231714,0.111574439,0.0619858,0.566888313,5.071565423,3.711258875,2505,1,7,1,60,32,Excess,Isobaric,1->1,Low,1.251571405,0.163654474,0.001537941,0.299770834,0.078795305,0.010109033,0,0.00155301,0.17,16.19,1.19,49.75624675
Melt_es_211_34,NA,NA,Modelled melt extract,211,34,2,1,2,1,0,7.589285719,706,74.67591334,0,15.53576285,0.114450186,0.064590699,0.817015683,4.967817968,3.824449279,2615,10,28,1,60,32,Excess,Gentle,1->1,Low,1.242941301,0.160306645,0.001602572,0.304742308,0.081198498,0.014569429,0,0.001593037,0.18,11,1.19,50.14917977
Melt_es_214_34,NA,NA,Modelled melt extract,214,34,2,1,2,2,0,8.178571438,706,74.34830081,0,15.6612529,0.117146627,0.065966062,0.833674537,5.070287976,3.903371093,2740,19,43,1,60,32,Excess,Steep,1->1,Low,1.237488362,0.163613252,0.001636696,0.307203862,0.082874121,0.014866498,0,0.001630569,0.18,11.01,1.18,50.09376189
Melt_es_235_34,NA,NA,Modelled melt extract,235,34,2,2,2,0,0,7,706,74.80496155,0,15.31121962,0.108884773,0.060616265,0.884548465,4.093842959,4.735926362,3412,1,7,1,60,45,Excess,Isobaric,1->1,Low,1.24508924,0.132104323,0.001503961,0.300337772,0.100550454,0.015773707,0,0.001515572,0.17,8.37,1.21,49.80773909
Melt_es_236_34,NA,NA,Modelled melt extract,236,34,2,2,2,0,1,7,706,74.71348233,0,15.28842592,0.108882329,0.060614905,0.883406109,3.844556445,5.100631967,3500,1,14,1,60,45,Excess,Isobaric,7->1,Low,1.243566617,0.12406009,0.001503928,0.299890661,0.108293672,0.015753336,0,0.001515538,0.17,7.88,1.21,49.80773909
Melt_es_237_34,NA,NA,Modelled melt extract,237,34,2,2,2,0,2,7,706,74.71348233,0,15.28842592,0.108882329,0.060614905,0.883406109,3.844556445,5.100631967,3510,1,21,1,60,45,Excess,Isobaric,10->1,Low,1.243566617,0.12406009,0.001503928,0.299890661,0.108293672,0.015753336,0,0.001515538,0.17,7.88,1.21,49.80773909
Melt_es_238_34,NA,NA,Modelled melt extract,238,34,2,2,2,1,0,7.589285719,706,74.72609477,0,15.3432154,0.113067173,0.063317617,0.807299617,4.396051694,4.550953722,3519,1,28,1,60,45,Excess,Gentle,1->1,Low,1.243776544,0.141856305,0.001570985,0.300965387,0.096623221,0.014396167,0,0.001573787,0.18,9.85,1.19,49.95544907
Melt_es_241_34,NA,NA,Modelled melt extract,241,34,2,2,2,2,0,8.178571438,706,74.34830081,0,15.6612529,0.117146627,0.065966062,0.833674537,5.070287976,3.903371093,3628,1,43,1,60,45,Excess,Steep,1->1,Low,1.237488362,0.163613252,0.001636696,0.307203862,0.082874121,0.014866498,0,0.001630569,0.18,11.01,1.18,50.09376189
Melt_es_19_35,NA,NA,Modelled melt extract,19,35,0,0,2,0,0,7,708,74.88843904,0,14.96426694,0.284075023,0.059275497,0.86452753,3.403308244,5.536107725,2,1,7,1,20,20,Excess,Isobaric,1->1,Low,1.246478679,0.109821441,0.001470695,0.293532109,0.117539442,0.015416684,0,0.003954054,0.34,7.12,1.21,27.11084765
Melt_es_21_35,NA,NA,Modelled melt extract,21,35,0,0,2,0,2,7,708,74.88843904,0,14.96426694,0.284075023,0.059275497,0.86452753,3.403308244,5.536107725,2,1,21,1,20,20,Excess,Isobaric,10->1,Low,1.246478679,0.109821441,0.001470695,0.293532109,0.117539442,0.015416684,0,0.003954054,0.34,7.12,1.21,27.11084765
Melt_es_22_35,NA,NA,Modelled melt extract,22,35,0,0,2,1,0,7.607142862,708,74.26882109,0,15.56011916,0.169254378,0.063188301,0.910588554,4.341938978,4.686089547,2,1,28,1,20,20,Excess,Gentle,1->1,Low,1.236165464,0.14011014,0.001567777,0.30522007,0.099492347,0.016238067,0,0.00235586,0.23,8.63,1.19,39.95723873
Melt_es_24_35,NA,NA,Modelled melt extract,24,35,0,0,2,1,2,7.607142862,708,74.26882109,0,15.56011916,0.169254378,0.063188301,0.910588554,4.341938978,4.686089547,2,1,42,1,20,20,Excess,Gentle,10->1,Low,1.236165464,0.14011014,0.001567777,0.30522007,0.099492347,0.016238067,0,0.00235586,0.23,8.63,1.19,39.95723873
Melt_es_25_35,NA,NA,Modelled melt extract,25,35,0,0,2,2,0,8.214285724,708,74.36089884,0,15.42030568,0.390056405,0.09893559,0.832423581,4.800081878,4.097298035,2,1,43,1,20,20,Excess,Steep,1->1,Low,1.23769805,0.154893965,0.002454709,0.302477553,0.086991466,0.01484419,0,0.005429213,0.49,10.43,1.18,31.13563481
Melt_es_46_35,NA,NA,Modelled melt extract,46,35,0,1,2,0,0,7,708,74.88843904,0,14.96426694,0.284075023,0.059275497,0.86452753,3.403308244,5.536107725,2,1,7,1,20,32,Excess,Isobaric,1->1,Low,1.246478679,0.109821441,0.001470695,0.293532109,0.117539442,0.015416684,0,0.003954054,0.34,7.12,1.21,27.11084765
Melt_es_49_35,NA,NA,Modelled melt extract,49,35,0,1,2,1,0,7.607142862,708,74.26882109,0,15.56011916,0.169254378,0.063188301,0.910588554,4.341938978,4.686089547,2,10,28,1,20,32,Excess,Gentle,1->1,Low,1.236165464,0.14011014,0.001567777,0.30522007,0.099492347,0.016238067,0,0.00235586,0.23,8.63,1.19,39.95723873
Melt_es_50_35,NA,NA,Modelled melt extract,50,35,0,1,2,1,1,7.607142862,708,74.26882109,0,15.56011916,0.169254378,0.063188301,0.910588554,4.341938978,4.686089547,2,10,35,1,20,32,Excess,Gentle,7->1,Low,1.236165464,0.14011014,0.001567777,0.30522007,0.099492347,0.016238067,0,0.00235586,0.23,8.63,1.19,39.95723873
Melt_es_73_35,NA,NA,Modelled melt extract,73,35,0,2,2,0,0,7,708,74.88843904,0,14.96426694,0.284075023,0.059275497,0.86452753,3.403308244,5.536107725,2,1,7,1,20,45,Excess,Isobaric,1->1,Low,1.246478679,0.109821441,0.001470695,0.293532109,0.117539442,0.015416684,0,0.003954054,0.34,7.12,1.21,27.11084765
Melt_es_74_35,NA,NA,Modelled melt extract,74,35,0,2,2,0,1,7,708,74.88843904,0,14.96426694,0.284075023,0.059275497,0.86452753,3.403308244,5.536107725,2,1,14,1,20,45,Excess,Isobaric,7->1,Low,1.246478679,0.109821441,0.001470695,0.293532109,0.117539442,0.015416684,0,0.003954054,0.34,7.12,1.21,27.11084765
Melt_es_76_35,NA,NA,Modelled melt extract,76,35,0,2,2,1,0,7.607142862,708,74.26882109,0,15.56011916,0.169254378,0.063188301,0.910588554,4.341938978,4.686089547,2,1,28,1,20,45,Excess,Gentle,1->1,Low,1.236165464,0.14011014,0.001567777,0.30522007,0.099492347,0.016238067,0,0.00235586,0.23,8.63,1.19,39.95723873
Melt_es_79_35,NA,NA,Modelled melt extract,79,35,0,2,2,2,0,8.214285724,708,74.25393504,0,15.6491675,0.176280593,0.065963061,0.951915203,4.802793194,4.09994541,2,1,43,1,20,45,Excess,Steep,1->1,Low,1.235917694,0.154981456,0.001636622,0.306966801,0.087047673,0.016975024,0,0.002453658,0.24,9.13,1.19,40.01246767
Melt_es_80_35,NA,NA,Modelled melt extract,80,35,0,2,2,2,1,8.214285724,708,74.36089884,0,15.42030568,0.390056405,0.09893559,0.832423581,4.800081878,4.097298035,2,1,36,1,20,45,Excess,Steep,7->1,Low,1.23769805,0.154893965,0.002454709,0.302477553,0.086991466,0.01484419,0,0.005429213,0.49,10.43,1.18,31.13563481
Melt_es_100_35,NA,NA,Modelled melt extract,100,35,1,0,2,0,0,7,708,74.99098531,0,15.26863788,0.371856125,0.094654286,0.565672045,5.191336879,3.516857478,2,1,7,1,42,20,Excess,Isobaric,1->1,Low,1.248185508,0.167519383,0.002348485,0.299502508,0.074667887,0.010087344,0,0.005175883,0.47,16.61,1.19,31.21172683
Melt_es_103_35,NA,NA,Modelled melt extract,103,35,1,0,2,1,0,7.607142862,708,74.4177089,0,15.50888164,0.382907377,0.097426137,0.815660685,4.959670111,3.817745151,2,1,28,1,42,20,Excess,Gentle,1->1,Low,1.238643623,0.160043722,0.002417258,0.304215018,0.08105616,0.014545266,0,0.005329706,0.48,11,1.19,31.20265125
Melt_es_104_35,NA,NA,Modelled melt extract,104,35,1,0,2,1,1,7.607142862,708,74.15254237,0,15.71422097,0.382942083,0.097434968,0.815734614,5.216169673,3.620955316,2,1,35,1,42,20,Excess,Gentle,7->1,Low,1.234230066,0.168320713,0.002417477,0.308242859,0.076878032,0.014546584,0,0.005330189,0.48,11.57,1.19,31.20265125
Melt_es_106_35,NA,NA,Modelled melt extract,106,35,1,0,2,2,0,8.214285724,708,74.25393504,0,15.6491675,0.176280593,0.065963061,0.951915203,4.802793194,4.09994541,2,1,43,1,42,20,Excess,Steep,1->1,Low,1.235917694,0.154981456,0.001636622,0.306966801,0.087047673,0.016975024,0,0.002453658,0.24,9.13,1.19,40.01246767
Melt_es_108_35,NA,NA,Modelled melt extract,108,35,1,0,2,2,2,8.214285724,708,74.14793122,0,15.58850006,0.394270543,0.100276901,0.842098066,4.986496804,3.940426405,2,1,29,1,42,20,Excess,Steep,10->1,Low,1.234153316,0.160909393,0.002487989,0.305776776,0.083660858,0.01501671,0,0.00548787,0.49,10.72,1.18,31.19399311
Melt_es_127_35,NA,NA,Modelled melt extract,127,35,1,1,2,0,0,7,708,74.75418668,0,15.31001661,0.163875544,0.060611503,0.884478966,4.092398869,4.734431823,2,1,7,1,42,32,Excess,Isobaric,1->1,Low,1.244244119,0.132057724,0.001503843,0.300314174,0.100518722,0.015772467,0,0.002280991,0.22,8.37,1.21,39.73339501
Melt_es_130_35,NA,NA,Modelled melt extract,130,35,1,1,2,1,0,7.607142862,708,74.57481746,0,15.37089912,0.16928303,0.063198998,0.911871255,4.21966166,4.690268483,2,10,28,1,42,32,Excess,Gentle,1->1,Low,1.241258613,0.13616437,0.001568042,0.301508417,0.099581072,0.01626094,0,0.002356258,0.23,8.37,1.2,39.95723873
Melt_es_131_35,NA,NA,Modelled melt extract,131,35,1,1,2,1,1,7.607142862,708,74.26882109,0,15.56011916,0.169254378,0.063188301,0.910588554,4.341938978,4.686089547,2,10,35,1,42,32,Excess,Gentle,7->1,Low,1.236165464,0.14011014,0.001567777,0.30522007,0.099492347,0.016238067,0,0.00235586,0.23,8.63,1.19,39.95723873
Melt_es_133_35,NA,NA,Modelled melt extract,133,35,1,1,2,2,0,8.214285724,708,74.25393504,0,15.6491675,0.176280593,0.065963061,0.951915203,4.802793194,4.09994541,2,19,43,1,42,32,Excess,Steep,1->1,Low,1.235917694,0.154981456,0.001636622,0.306966801,0.087047673,0.016975024,0,0.002453658,0.24,9.13,1.19,40.01246767
Melt_es_135_35,NA,NA,Modelled melt extract,135,35,1,1,2,2,2,8.214285724,708,74.36089884,0,15.42030568,0.390056405,0.09893559,0.832423581,4.800081878,4.097298035,51,19,29,1,42,32,Excess,Steep,10->1,Low,1.23769805,0.154893965,0.002454709,0.302477553,0.086991466,0.01484419,0,0.005429213,0.49,10.43,1.18,31.13563481
[truncated: 853,368 more chars]
